# Supplementary material for: Arterial endothelial methylome: differential DNA methylation in athero-susceptible disturbed flow regions in vivo
Source: PubMed Central journal article supplement (PMC4492093; doi:10.1186/s12864-015-1656-4), 2015-07-07
Supplement: 12864_2015_1656_MOESM2_ESM.pdf [file 12864_2015_1656_MOESM2_ESM.pdf]

Supplementary Table 1a. AA vs DT DMRs

| DMR                      | DMR size | Conc | Conc_ AA | Conc_ DT | Fold, log2 (AA/DT) | p-value | FDR     |
|--------------------------|----------|------|----------|----------|--------------------|---------|---------|
| chr1:10072648-10073607   | 960      | 4.2  | 3.8      | 4.5      | ↓ -0.7             | 1.1E-05 | 5.8E-03 |
| chr1:101194381-101195145 | 765      | 4.3  | 4.1      | 4.6      | ↓ -0.5             | 5.2E-04 | 9.0E-02 |
| chr1:101207924-101208329 | 406      | 2.9  | 2.3      | 3.3      | ↓ -1.0             | 7.8E-05 | 2.5E-02 |
| chr1:101209833-101211029 | 1197     | 4.9  | 4.6      | 5.2      | ↓ -0.7             | 4.8E-07 | 4.1E-04 |
| chr1:101211632-101214877 | 3246     | 6.8  | 6.2      | 7.2      | ↓ -1.0             | 4.7E-14 | 2.8E-10 |
| chr1:101214973-101215773 | 801      | 3.6  | 3.0      | 4.0      | ↓ -1.0             | 6.9E-07 | 5.6E-04 |
| chr1:101216313-101217304 | 992      | 5.0  | 4.4      | 5.5      | ↓ -1.1             | 1.2E-18 | 1.6E-14 |
| chr1:101218305-101220130 | 1826     | 5.0  | 4.7      | 5.3      | ↓ -0.6             | 1.2E-05 | 6.0E-03 |
| chr1:101220482-101221441 | 960      | 4.0  | 3.3      | 4.4      | ↓ -1.2             | 4.4E-09 | 8.1E-06 |
| chr1:101771454-101772635 | 1182     | 4.8  | 4.4      | 5.0      | ↓ -0.7             | 4.5E-04 | 8.2E-02 |
| chr1:10232708-10233241   | 534      | 3.9  | 3.5      | 4.2      | ↓ -0.7             | 5.8E-04 | 9.6E-02 |
| chr1:103707995-103708493 | 499      | 2.4  | 1.7      | 2.9      | ↓ -1.2             | 2.2E-05 | 8.9E-03 |
| chr1:103708825-103709398 | 574      | 4.1  | 3.5      | 4.5      | ↓ -1.0             | 5.4E-10 | 1.4E-06 |
| chr1:103710936-103711398 | 463      | 3.3  | 2.3      | 3.8      | ↓ -1.5             | 9.5E-10 | 2.3E-06 |
| chr1:106130999-106132248 | 1250     | 5.5  | 5.0      | 5.8      | ↓ -0.8             | 5.3E-09 | 9.5E-06 |
| chr1:106455466-106455916 | 451      | 2.4  | 2.9      | 1.7      | ↑ 1.3              | 6.6E-06 | 3.9E-03 |
| chr1:107242621-107243912 | 1292     | 5.0  | 4.7      | 5.3      | ↓ -0.6             | 9.6E-06 | 5.1E-03 |
| chr1:107642230-107642997 | 768      | 3.2  | 3.6      | 2.7      | ↑ 1.0              | 1.4E-05 | 6.5E-03 |
| chr1:107942815-107943461 | 647      | 3.2  | 2.6      | 3.7      | ↓ -1.1             | 5.4E-08 | 6.6E-05 |
| chr1:108696178-108697032 | 855      | 4.1  | 4.4      | 3.6      | ↑ 0.9              | 6.9E-06 | 4.0E-03 |
| chr1:10897515-10897806   | 292      | 2.1  | 1.2      | 2.7      | ↓ -1.5             | 2.2E-06 | 1.6E-03 |
| chr1:109034185-109035746 | 1562     | 5.6  | 5.3      | 5.8      | ↓ -0.5             | 5.5E-06 | 3.3E-03 |
| chr1:109093611-109094169 | 559      | 2.4  | 2.8      | 1.8      | ↑ 1.0              | 4.1E-04 | 7.7E-02 |
| chr1:110359417-110359731 | 315      | 1.7  | 2.3      | 0.6      | ↑ 1.7              | 1.7E-06 | 1.3E-03 |
| chr1:113737036-113738066 | 1031     | 3.5  | 3.1      | 3.9      | ↓ -0.8             | 1.9E-05 | 7.9E-03 |
| chr1:114972305-114972750 | 446      | 4.0  | 3.7      | 4.2      | ↓ -0.6             | 3.5E-04 | 7.0E-02 |
| chr1:115036868-115037313 | 446      | 2.4  | 1.8      | 2.8      | ↓ -1.1             | 7.2E-05 | 2.3E-02 |
| chr1:115390685-115391181 | 497      | 4.1  | 4.4      | 3.6      | ↑ 0.8              | 2.3E-05 | 9.3E-03 |
| chr1:11563699-11565760   | 2062     | 6.0  | 5.7      | 6.2      | ↓ -0.5             | 5.8E-07 | 4.8E-04 |
| chr1:117585981-117586344 | 364      | 2.4  | 1.8      | 2.8      | ↓ -1.1             | 5.4E-05 | 1.8E-02 |
| chr1:117807968-117808808 | 841      | 4.6  | 4.8      | 4.2      | ↑ 0.6              | 1.4E-05 | 6.5E-03 |
| chr1:118405608-118405990 | 383      | 2.4  | 1.8      | 2.8      | ↓ -1.0             | 4.2E-04 | 7.8E-02 |
| chr1:119725750-119726592 | 843      | 4.1  | 4.4      | 3.6      | ↑ 0.9              | 4.6E-06 | 2.9E-03 |
| chr1:121819342-121819953 | 612      | 2.8  | 1.9      | 3.3      | ↓ -1.5             | 2.5E-06 | 1.7E-03 |
| chr1:122467299-122468350 | 1052     | 3.3  | 3.6      | 2.9      | ↑ 0.7              | 2.0E-04 | 4.8E-02 |
| chr1:122518872-122519386 | 515      | 2.8  | 3.2      | 2.3      | ↑ 0.9              | 2.0E-04 | 4.8E-02 |
| chr1:122840654-122841213 | 560      | 4.4  | 4.0      | 4.7      | ↓ -0.7             | 1.4E-06 | 1.1E-03 |
| chr1:123082756-123083263 | 508      | 3.6  | 3.9      | 3.1      | ↑ 0.9              | 8.8E-05 | 2.8E-02 |
| chr1:123142113-123144469 | 2357     | 6.1  | 5.9      | 6.2      | ↓ -0.3             | 1.7E-04 | 4.4E-02 |
| chr1:123174530-123174793 | 264      | 1.8  | 0.8      | 2.3      | ↓ -1.6             | 1.3E-05 | 6.4E-03 |
| chr1:123355578-123355861 | 284      | 2.4  | 2.8      | 1.8      | ↑ 0.9              | 5.5E-04 | 9.3E-02 |
| chr1:126027396-126028275 | 880      | 3.7  | 4.0      | 3.4      | ↑ 0.6              | 6.3E-04 | 1.0E-01 |
| chr1:126466760-126467786 | 1027     | 4.1  | 3.8      | 4.4      | ↓ -0.6             | 8.9E-05 | 2.8E-02 |

|                          |      |     |     |     |   |      |         |         |
|--------------------------|------|-----|-----|-----|---|------|---------|---------|
| chr1:126520788-126521791 | 1004 | 4.9 | 4.6 | 5.0 | ↓ | -0.4 | 5.1E-04 | 8.9E-02 |
| chr1:126756689-126757301 | 613  | 4.2 | 3.9 | 4.5 | ↓ | -0.6 | 4.6E-04 | 8.3E-02 |
| chr1:126813988-126814826 | 839  | 3.6 | 3.9 | 3.2 | ↑ | 0.7  | 5.9E-04 | 9.7E-02 |
| chr1:126869640-126870431 | 792  | 3.2 | 3.6 | 2.8 | ↑ | 0.8  | 2.9E-04 | 6.4E-02 |
| chr1:127112334-127112634 | 301  | 2.3 | 2.7 | 1.6 | ↑ | 1.2  | 8.6E-05 | 2.7E-02 |
| chr1:127216864-127217563 | 700  | 4.9 | 4.6 | 5.2 | ↓ | -0.6 | 2.1E-06 | 1.5E-03 |
| chr1:127236225-127236529 | 305  | 2.5 | 2.9 | 1.9 | ↑ | 1.0  | 1.9E-04 | 4.6E-02 |
| chr1:127856483-127856840 | 358  | 2.8 | 1.6 | 3.5 | ↓ | -1.9 | 1.2E-12 | 6.2E-09 |
| chr1:127857586-127858223 | 638  | 3.6 | 3.1 | 4.0 | ↓ | -0.8 | 4.8E-05 | 1.6E-02 |
| chr1:127861770-127864198 | 2429 | 4.9 | 4.4 | 5.3 | ↓ | -1.0 | 2.9E-08 | 4.0E-05 |
| chr1:129111338-129111910 | 573  | 3.1 | 2.6 | 3.4 | ↓ | -0.9 | 3.4E-04 | 6.9E-02 |
| chr1:136551552-136552913 | 1362 | 4.1 | 3.8 | 4.4 | ↓ | -0.6 | 2.5E-04 | 5.6E-02 |
| chr1:136572442-136573135 | 694  | 4.7 | 4.5 | 4.9 | ↓ | -0.4 | 2.4E-04 | 5.6E-02 |
| chr1:140899891-140900294 | 404  | 2.6 | 3.0 | 2.0 | ↑ | 1.0  | 5.3E-04 | 9.1E-02 |
| chr1:14123234-14123490   | 257  | 2.1 | 2.5 | 1.5 | ↑ | 1.1  | 5.6E-04 | 9.4E-02 |
| chr1:142360174-142360396 | 223  | 1.8 | 1.1 | 2.3 | ↓ | -1.3 | 2.0E-04 | 4.8E-02 |
| chr1:14263639-14265502   | 1864 | 5.6 | 5.8 | 5.4 | ↑ | 0.4  | 1.9E-06 | 1.4E-03 |
| chr1:14291905-14293254   | 1350 | 4.8 | 4.6 | 5.0 | ↓ | -0.4 | 1.8E-04 | 4.5E-02 |
| chr1:14340675-14342198   | 1524 | 5.9 | 5.7 | 6.0 | ↓ | -0.4 | 3.7E-06 | 2.4E-03 |
| chr1:144122700-144123045 | 346  | 2.5 | 3.0 | 1.9 | ↑ | 1.0  | 2.8E-04 | 6.2E-02 |
| chr1:146289415-146290197 | 783  | 5.5 | 5.3 | 5.8 | ↓ | -0.5 | 1.2E-07 | 1.3E-04 |
| chr1:147127720-147128778 | 1059 | 3.9 | 3.4 | 4.2 | ↓ | -0.8 | 3.9E-05 | 1.4E-02 |
| chr1:148553442-148554842 | 1401 | 4.4 | 4.1 | 4.6 | ↓ | -0.5 | 1.6E-04 | 4.3E-02 |
| chr1:149725943-149727104 | 1162 | 4.5 | 3.9 | 4.9 | ↓ | -1.0 | 1.6E-07 | 1.7E-04 |
| chr1:149728920-149729779 | 860  | 4.3 | 3.5 | 4.8 | ↓ | -1.3 | 6.2E-09 | 1.1E-05 |
| chr1:149731032-149732241 | 1210 | 3.2 | 2.6 | 3.6 | ↓ | -1.0 | 2.9E-04 | 6.3E-02 |
| chr1:149732975-149733385 | 411  | 2.5 | 1.9 | 2.9 | ↓ | -1.0 | 1.1E-04 | 3.3E-02 |
| chr1:149816460-149816948 | 489  | 3.0 | 3.5 | 2.4 | ↑ | 1.1  | 1.4E-05 | 6.5E-03 |
| chr1:149819116-149819631 | 516  | 3.1 | 3.6 | 2.3 | ↑ | 1.3  | 4.8E-08 | 6.1E-05 |
| chr1:153861939-153862402 | 464  | 3.1 | 2.7 | 3.5 | ↓ | -0.7 | 5.6E-04 | 9.4E-02 |
| chr1:154101394-154102902 | 1509 | 5.4 | 5.7 | 5.1 | ↑ | 0.6  | 5.2E-08 | 6.4E-05 |
| chr1:154770011-154770694 | 684  | 3.7 | 3.2 | 4.0 | ↓ | -0.8 | 2.3E-05 | 9.4E-03 |
| chr1:155498582-155499623 | 1042 | 3.3 | 3.7 | 2.8 | ↑ | 0.9  | 6.8E-05 | 2.2E-02 |
| chr1:155500639-155504575 | 3937 | 6.9 | 7.1 | 6.8 | ↑ | 0.3  | 2.1E-04 | 4.9E-02 |
| chr1:155647870-155648500 | 631  | 3.6 | 3.9 | 3.2 | ↑ | 0.7  | 3.9E-04 | 7.5E-02 |
| chr1:155680758-155681374 | 617  | 3.3 | 2.8 | 3.7 | ↓ | -1.0 | 3.8E-04 | 7.4E-02 |
| chr1:155681593-155682566 | 974  | 3.4 | 2.9 | 3.8 | ↓ | -0.9 | 1.3E-05 | 6.5E-03 |
| chr1:155682789-155684082 | 1294 | 4.4 | 3.7 | 4.8 | ↓ | -1.1 | 2.4E-09 | 4.9E-06 |
| chr1:155739539-155740117 | 579  | 3.3 | 2.9 | 3.6 | ↓ | -0.8 | 1.6E-04 | 4.3E-02 |
| chr1:157469564-157470108 | 545  | 3.5 | 2.8 | 3.9 | ↓ | -1.1 | 4.7E-07 | 4.1E-04 |
| chr1:159379450-159379803 | 354  | 2.5 | 1.9 | 3.0 | ↓ | -1.0 | 2.1E-04 | 5.0E-02 |
| chr1:1613273-1616603     | 3331 | 5.8 | 5.4 | 6.2 | ↓ | -0.8 | 7.8E-09 | 1.3E-05 |
| chr1:161610854-161611473 | 620  | 4.4 | 4.7 | 4.2 | ↑ | 0.5  | 2.2E-04 | 5.2E-02 |
| chr1:162054177-162054769 | 593  | 3.8 | 3.3 | 4.1 | ↓ | -0.8 | 1.1E-04 | 3.4E-02 |
| chr1:162068109-162069708 | 1600 | 5.2 | 5.0 | 5.3 | ↓ | -0.4 | 3.6E-04 | 7.2E-02 |
| chr1:162075514-162076174 | 661  | 4.0 | 4.3 | 3.7 | ↑ | 0.7  | 3.0E-05 | 1.1E-02 |
| chr1:162322008-162322641 | 634  | 3.8 | 3.2 | 4.2 | ↓ | -1.0 | 7.8E-09 | 1.3E-05 |

|                          |      |     |     |     |   |      |         |         |
|--------------------------|------|-----|-----|-----|---|------|---------|---------|
| chr1:1626113-1628185     | 2073 | 6.7 | 6.6 | 6.9 | ↓ | -0.3 | 1.1E-05 | 5.7E-03 |
| chr1:163538636-163543809 | 5174 | 8.0 | 7.9 | 8.1 | ↓ | -0.2 | 1.5E-04 | 4.1E-02 |
| chr1:163546426-163548408 | 1983 | 6.7 | 6.5 | 6.8 | ↓ | -0.3 | 1.4E-06 | 1.1E-03 |
| chr1:163634046-163641667 | 7622 | 8.8 | 8.7 | 8.8 | ↓ | -0.2 | 4.1E-04 | 7.7E-02 |
| chr1:163805985-163806823 | 839  | 3.8 | 3.4 | 4.1 | ↓ | -0.7 | 2.7E-04 | 6.1E-02 |
| chr1:163828089-163828413 | 325  | 2.0 | 2.5 | 1.2 | ↑ | 1.3  | 4.7E-05 | 1.6E-02 |
| chr1:164419501-164420118 | 618  | 3.9 | 3.3 | 4.4 | ↓ | -1.0 | 4.2E-06 | 2.7E-03 |
| chr1:164499497-164499895 | 399  | 2.9 | 3.2 | 2.4 | ↑ | 0.9  | 6.0E-04 | 9.8E-02 |
| chr1:164742301-164742693 | 393  | 3.2 | 2.8 | 3.5 | ↓ | -0.7 | 4.6E-04 | 8.3E-02 |
| chr1:164777826-164778963 | 1138 | 5.1 | 4.6 | 5.5 | ↓ | -0.9 | 1.2E-11 | 5.4E-08 |
| chr1:164779262-164781377 | 2116 | 5.1 | 4.3 | 5.6 | ↓ | -1.3 | 4.2E-16 | 3.9E-12 |
| chr1:164782977-164783908 | 932  | 4.7 | 4.3 | 5.0 | ↓ | -0.6 | 3.7E-05 | 1.3E-02 |
| chr1:164867566-164868723 | 1158 | 4.5 | 4.1 | 4.8 | ↓ | -0.7 | 5.2E-08 | 6.4E-05 |
| chr1:165500766-165501244 | 479  | 2.5 | 1.8 | 2.9 | ↓ | -1.0 | 2.2E-04 | 5.1E-02 |
| chr1:16550690-16552228   | 1539 | 5.6 | 5.4 | 5.7 | ↓ | -0.4 | 1.3E-04 | 3.8E-02 |
| chr1:168269626-168269964 | 339  | 3.0 | 2.6 | 3.3 | ↓ | -0.8 | 2.8E-04 | 6.2E-02 |
| chr1:170050987-170051672 | 686  | 3.4 | 3.9 | 2.4 | ↑ | 1.5  | 1.3E-07 | 1.4E-04 |
| chr1:171961346-171961714 | 369  | 2.1 | 2.5 | 1.3 | ↑ | 1.2  | 1.3E-04 | 3.8E-02 |
| chr1:17258711-17259784   | 1074 | 4.5 | 4.7 | 4.2 | ↑ | 0.5  | 5.9E-04 | 9.7E-02 |
| chr1:174007112-174007421 | 310  | 2.5 | 1.9 | 2.9 | ↓ | -1.0 | 1.6E-04 | 4.2E-02 |
| chr1:176156089-176156491 | 403  | 3.1 | 3.5 | 2.6 | ↑ | 0.9  | 7.8E-05 | 2.5E-02 |
| chr1:176594382-176596724 | 2343 | 6.3 | 6.1 | 6.4 | ↓ | -0.4 | 1.2E-07 | 1.3E-04 |
| chr1:176608564-176609283 | 720  | 4.8 | 5.0 | 4.5 | ↑ | 0.5  | 1.4E-04 | 4.0E-02 |
| chr1:176619287-176620164 | 878  | 5.8 | 5.6 | 6.0 | ↓ | -0.5 | 9.8E-09 | 1.5E-05 |
| chr1:176899901-176900240 | 340  | 2.9 | 2.4 | 3.3 | ↓ | -1.0 | 8.9E-05 | 2.8E-02 |
| chr1:176923783-176924461 | 679  | 3.4 | 2.6 | 3.8 | ↓ | -1.2 | 4.3E-08 | 5.7E-05 |
| chr1:179586932-179588835 | 1904 | 4.9 | 5.1 | 4.7 | ↑ | 0.4  | 3.1E-04 | 6.7E-02 |
| chr1:179661302-179663608 | 2307 | 5.9 | 6.2 | 5.6 | ↑ | 0.6  | 7.5E-08 | 8.7E-05 |
| chr1:179663787-179664702 | 916  | 4.5 | 4.8 | 4.0 | ↑ | 0.7  | 4.0E-07 | 3.6E-04 |
| chr1:179667496-179667971 | 476  | 2.5 | 3.1 | 1.5 | ↑ | 1.7  | 8.8E-09 | 1.4E-05 |
| chr1:179668128-179670953 | 2826 | 6.1 | 6.5 | 5.6 | ↑ | 0.9  | 3.8E-15 | 3.1E-11 |
| chr1:179672958-179674187 | 1230 | 4.0 | 4.4 | 3.5 | ↑ | 0.9  | 1.7E-07 | 1.7E-04 |
| chr1:179675803-179676642 | 840  | 3.2 | 3.6 | 2.8 | ↑ | 0.8  | 2.4E-04 | 5.6E-02 |
| chr1:179680040-179680939 | 900  | 3.8 | 4.1 | 3.4 | ↑ | 0.8  | 9.6E-06 | 5.1E-03 |
| chr1:180577369-180578925 | 1557 | 5.4 | 5.7 | 5.1 | ↑ | 0.6  | 8.2E-09 | 1.3E-05 |
| chr1:180741836-180742257 | 422  | 2.9 | 2.4 | 3.2 | ↓ | -0.8 | 6.1E-04 | 9.9E-02 |
| chr1:181156308-181156676 | 369  | 2.3 | 2.7 | 1.7 | ↑ | 1.0  | 4.0E-04 | 7.6E-02 |
| chr1:181895050-181895447 | 398  | 2.3 | 2.8 | 1.8 | ↑ | 1.0  | 3.9E-04 | 7.4E-02 |
| chr1:182455370-182455856 | 487  | 3.1 | 2.6 | 3.5 | ↓ | -0.8 | 5.7E-04 | 9.6E-02 |
| chr1:182460105-182461248 | 1144 | 3.9 | 3.5 | 4.3 | ↓ | -0.7 | 3.9E-06 | 2.5E-03 |
| chr1:183195350-183195956 | 607  | 2.8 | 3.2 | 2.1 | ↑ | 1.1  | 1.9E-05 | 7.9E-03 |
| chr1:184688283-184688548 | 266  | 2.1 | 2.5 | 1.4 | ↑ | 1.1  | 5.9E-04 | 9.7E-02 |
| chr1:185315856-185316242 | 387  | 2.2 | 2.7 | 1.6 | ↑ | 1.1  | 2.0E-04 | 4.8E-02 |
| chr1:185399973-185400234 | 262  | 2.0 | 1.3 | 2.5 | ↓ | -1.2 | 1.5E-04 | 4.1E-02 |
| chr1:185408217-185408773 | 557  | 3.3 | 2.8 | 3.6 | ↓ | -0.8 | 1.5E-04 | 4.1E-02 |
| chr1:185684850-185685395 | 546  | 3.7 | 3.2 | 4.1 | ↓ | -0.8 | 7.0E-06 | 4.0E-03 |
| chr1:186585509-186586710 | 1202 | 4.5 | 4.2 | 4.7 | ↓ | -0.5 | 2.4E-05 | 9.5E-03 |

|                          |      |     |     |     |   |      |         |         |
|--------------------------|------|-----|-----|-----|---|------|---------|---------|
| chr1:186599010-186599394 | 385  | 2.5 | 1.8 | 3.0 | ↓ | -1.1 | 1.7E-05 | 7.4E-03 |
| chr1:186601301-186601935 | 635  | 2.5 | 1.9 | 2.9 | ↓ | -1.0 | 9.1E-05 | 2.8E-02 |
| chr1:186764097-186764400 | 304  | 2.3 | 1.7 | 2.7 | ↓ | -1.0 | 3.8E-04 | 7.4E-02 |
| chr1:187435626-187435883 | 258  | 2.2 | 1.6 | 2.7 | ↓ | -1.0 | 3.6E-04 | 7.2E-02 |
| chr1:187725341-187725593 | 253  | 1.6 | 2.1 | 0.9 | ↑ | 1.3  | 6.1E-04 | 9.9E-02 |
| chr1:187802796-187803849 | 1054 | 4.2 | 3.7 | 4.5 | ↓ | -0.7 | 4.1E-05 | 1.4E-02 |
| chr1:187913503-187914972 | 1470 | 5.4 | 5.7 | 5.1 | ↑ | 0.6  | 1.7E-07 | 1.7E-04 |
| chr1:189390134-189391172 | 1039 | 3.6 | 3.2 | 3.8 | ↓ | -0.6 | 4.9E-04 | 8.7E-02 |
| chr1:189404554-189404786 | 233  | 1.9 | 1.1 | 2.4 | ↓ | -1.2 | 1.5E-04 | 4.1E-02 |
| chr1:1923928-1924870     | 943  | 4.8 | 4.5 | 5.1 | ↓ | -0.6 | 1.4E-05 | 6.5E-03 |
| chr1:19261286-19263375   | 2090 | 6.0 | 5.8 | 6.2 | ↓ | -0.4 | 1.8E-04 | 4.5E-02 |
| chr1:19482230-19482804   | 575  | 3.2 | 2.5 | 3.7 | ↓ | -1.2 | 6.9E-08 | 8.2E-05 |
| chr1:1955707-1957311     | 1605 | 5.0 | 4.7 | 5.2 | ↓ | -0.5 | 3.1E-04 | 6.6E-02 |
| chr1:200857415-200858442 | 1028 | 4.1 | 4.3 | 3.8 | ↑ | 0.6  | 1.8E-04 | 4.5E-02 |
| chr1:201009449-201010318 | 870  | 4.1 | 3.5 | 4.5 | ↓ | -1.0 | 8.5E-06 | 4.7E-03 |
| chr1:201317973-201318431 | 459  | 3.6 | 3.2 | 3.9 | ↓ | -0.7 | 5.9E-04 | 9.7E-02 |
| chr1:201827298-201828000 | 703  | 3.0 | 3.5 | 2.4 | ↑ | 1.1  | 3.9E-05 | 1.4E-02 |
| chr1:201828182-201828821 | 640  | 4.1 | 4.5 | 3.6 | ↑ | 0.9  | 3.4E-05 | 1.3E-02 |
| chr1:201834826-201835190 | 365  | 2.3 | 2.8 | 1.6 | ↑ | 1.2  | 1.3E-04 | 3.7E-02 |
| chr1:201860888-201861407 | 520  | 3.2 | 3.6 | 2.5 | ↑ | 1.1  | 1.7E-06 | 1.3E-03 |
| chr1:204048481-204049229 | 749  | 3.9 | 3.5 | 4.2 | ↓ | -0.7 | 2.6E-05 | 1.0E-02 |
| chr1:204078354-204078937 | 584  | 2.9 | 2.5 | 3.3 | ↓ | -0.8 | 2.8E-04 | 6.2E-02 |
| chr1:204081861-204082144 | 284  | 2.1 | 1.2 | 2.6 | ↓ | -1.4 | 1.8E-05 | 7.9E-03 |
| chr1:204129526-204131032 | 1507 | 5.2 | 5.5 | 4.8 | ↑ | 0.7  | 3.8E-10 | 1.1E-06 |
| chr1:204443632-204444192 | 561  | 2.8 | 2.3 | 3.2 | ↓ | -0.9 | 2.0E-04 | 4.9E-02 |
| chr1:205868761-205869317 | 557  | 4.5 | 4.1 | 4.8 | ↓ | -0.7 | 2.4E-05 | 9.5E-03 |
| chr1:206514937-206515579 | 643  | 3.1 | 3.4 | 2.6 | ↑ | 0.8  | 1.6E-04 | 4.2E-02 |
| chr1:206555896-206556583 | 688  | 3.2 | 3.7 | 2.3 | ↑ | 1.5  | 2.3E-10 | 7.3E-07 |
| chr1:206572438-206573032 | 595  | 2.3 | 2.9 | 1.4 | ↑ | 1.5  | 5.5E-06 | 3.3E-03 |
| chr1:206576707-206577044 | 338  | 2.5 | 3.0 | 1.8 | ↑ | 1.2  | 7.0E-06 | 4.0E-03 |
| chr1:206640466-206641380 | 915  | 4.0 | 4.4 | 3.3 | ↑ | 1.1  | 3.2E-09 | 6.2E-06 |
| chr1:206802814-206803173 | 360  | 3.4 | 3.8 | 2.8 | ↑ | 1.0  | 4.4E-04 | 8.0E-02 |
| chr1:207160746-207161130 | 385  | 2.0 | 1.3 | 2.5 | ↓ | -1.2 | 3.2E-04 | 6.8E-02 |
| chr1:207566846-207567387 | 542  | 3.2 | 2.7 | 3.5 | ↓ | -0.7 | 3.5E-04 | 7.0E-02 |
| chr1:209441336-209441969 | 634  | 3.7 | 3.3 | 4.0 | ↓ | -0.7 | 1.5E-05 | 7.0E-03 |
| chr1:209537063-209537850 | 788  | 5.0 | 4.6 | 5.3 | ↓ | -0.7 | 1.5E-08 | 2.2E-05 |
| chr1:210233494-210233818 | 325  | 2.5 | 1.9 | 2.9 | ↓ | -0.9 | 4.1E-04 | 7.7E-02 |
| chr1:21065647-21066301   | 655  | 4.4 | 4.1 | 4.7 | ↓ | -0.6 | 2.2E-05 | 9.0E-03 |
| chr1:210724259-210724842 | 584  | 3.4 | 4.0 | 2.4 | ↑ | 1.6  | 2.3E-10 | 7.3E-07 |
| chr1:210725131-210727895 | 2765 | 5.7 | 6.3 | 4.7 | ↑ | 1.6  | 7.1E-20 | 1.2E-15 |
| chr1:210727930-210728367 | 438  | 2.4 | 2.9 | 1.7 | ↑ | 1.2  | 4.6E-05 | 1.6E-02 |
| chr1:210728371-210732351 | 3981 | 7.1 | 7.7 | 6.3 | ↑ | 1.3  | 2.3E-23 | 7.5E-19 |
| chr1:210736110-210737153 | 1044 | 3.1 | 3.6 | 2.3 | ↑ | 1.3  | 2.4E-07 | 2.4E-04 |
| chr1:210737190-210738562 | 1373 | 4.5 | 4.9 | 3.9 | ↑ | 0.9  | 5.6E-11 | 2.3E-07 |
| chr1:210739364-210741392 | 2029 | 6.1 | 6.4 | 5.8 | ↑ | 0.5  | 5.7E-14 | 3.1E-10 |
| chr1:210789295-210790211 | 917  | 3.3 | 2.7 | 3.7 | ↓ | -1.0 | 1.6E-07 | 1.7E-04 |
| chr1:21159419-21159773   | 355  | 2.6 | 2.0 | 3.0 | ↓ | -1.0 | 3.2E-04 | 6.8E-02 |

|                          |      |     |     |     |   |      |         |         |
|--------------------------|------|-----|-----|-----|---|------|---------|---------|
| chr1:212907961-212908500 | 540  | 3.6 | 3.2 | 3.9 | ↓ | -0.7 | 3.4E-04 | 7.0E-02 |
| chr1:213026915-213027638 | 724  | 3.9 | 3.4 | 4.2 | ↓ | -0.8 | 2.3E-06 | 1.6E-03 |
| chr1:213223140-213223685 | 546  | 3.5 | 3.1 | 3.8 | ↓ | -0.7 | 4.7E-04 | 8.4E-02 |
| chr1:213320819-213321097 | 279  | 1.9 | 1.2 | 2.4 | ↓ | -1.2 | 2.1E-04 | 5.0E-02 |
| chr1:215937393-215937819 | 427  | 2.4 | 2.9 | 1.6 | ↑ | 1.3  | 7.8E-05 | 2.5E-02 |
| chr1:216553322-216553979 | 658  | 3.0 | 3.4 | 2.5 | ↑ | 1.0  | 2.1E-04 | 4.9E-02 |
| chr1:216927156-216927590 | 435  | 2.4 | 1.8 | 2.8 | ↓ | -0.9 | 5.1E-04 | 8.9E-02 |
| chr1:216993405-216993820 | 416  | 2.3 | 1.5 | 2.8 | ↓ | -1.3 | 1.3E-05 | 6.2E-03 |
| chr1:217050593-217050890 | 298  | 2.5 | 1.9 | 3.0 | ↓ | -1.1 | 1.7E-04 | 4.4E-02 |
| chr1:22147163-22147869   | 707  | 3.5 | 2.9 | 3.9 | ↓ | -0.9 | 3.1E-06 | 2.1E-03 |
| chr1:221910767-221911047 | 281  | 2.0 | 1.3 | 2.5 | ↓ | -1.2 | 1.7E-04 | 4.4E-02 |
| chr1:222701331-222701831 | 501  | 2.5 | 1.8 | 3.0 | ↓ | -1.1 | 1.7E-04 | 4.4E-02 |
| chr1:22559439-22559643   | 205  | 1.5 | 0.7 | 2.0 | ↓ | -1.3 | 3.7E-04 | 7.2E-02 |
| chr1:22561633-22562370   | 738  | 3.1 | 1.8 | 3.8 | ↓ | -2.0 | 4.7E-17 | 5.1E-13 |
| chr1:22564131-22564393   | 263  | 1.7 | 0.6 | 2.2 | ↓ | -1.6 | 4.8E-05 | 1.6E-02 |
| chr1:225952553-225953788 | 1236 | 4.4 | 4.8 | 4.0 | ↑ | 0.8  | 3.0E-06 | 2.1E-03 |
| chr1:226322064-226324025 | 1962 | 5.8 | 5.3 | 6.2 | ↓ | -0.8 | 3.2E-09 | 6.2E-06 |
| chr1:226327024-226328526 | 1503 | 5.5 | 4.9 | 5.9 | ↓ | -1.0 | 1.8E-12 | 8.3E-09 |
| chr1:226440604-226441372 | 769  | 2.8 | 3.2 | 2.3 | ↑ | 0.9  | 2.4E-04 | 5.6E-02 |
| chr1:226475145-226475506 | 362  | 3.1 | 2.6 | 3.4 | ↓ | -0.9 | 1.4E-04 | 4.0E-02 |
| chr1:226525613-226526150 | 538  | 2.5 | 1.9 | 2.9 | ↓ | -1.0 | 5.7E-04 | 9.4E-02 |
| chr1:229744215-229745797 | 1583 | 4.5 | 4.0 | 4.9 | ↓ | -0.9 | 3.1E-07 | 3.0E-04 |
| chr1:229806731-229807746 | 1016 | 3.6 | 3.0 | 4.0 | ↓ | -1.0 | 2.4E-05 | 9.7E-03 |
| chr1:2298109-2298444     | 336  | 3.7 | 3.3 | 4.0 | ↓ | -0.6 | 3.6E-04 | 7.2E-02 |
| chr1:231181282-231181911 | 630  | 2.6 | 2.0 | 2.9 | ↓ | -0.9 | 5.5E-04 | 9.4E-02 |
| chr1:232397726-232398564 | 839  | 4.7 | 4.1 | 5.1 | ↓ | -1.0 | 1.6E-14 | 1.0E-10 |
| chr1:232778898-232779585 | 688  | 3.7 | 3.2 | 4.1 | ↓ | -0.8 | 1.7E-04 | 4.4E-02 |
| chr1:2359413-2359733     | 321  | 3.6 | 3.1 | 3.9 | ↓ | -0.8 | 3.1E-05 | 1.2E-02 |
| chr1:236487914-236488482 | 569  | 4.2 | 4.6 | 3.7 | ↑ | 0.8  | 8.9E-06 | 4.8E-03 |
| chr1:23718876-23719344   | 469  | 3.5 | 2.8 | 3.9 | ↓ | -1.0 | 1.0E-06 | 8.4E-04 |
| chr1:238946704-238947382 | 679  | 3.0 | 3.4 | 2.5 | ↑ | 0.8  | 2.5E-04 | 5.7E-02 |
| chr1:239988919-239989315 | 397  | 3.5 | 3.7 | 3.1 | ↑ | 0.7  | 3.5E-04 | 7.0E-02 |
| chr1:24212605-24213210   | 606  | 3.1 | 2.7 | 3.5 | ↓ | -0.8 | 1.3E-04 | 3.8E-02 |
| chr1:24344400-24345228   | 829  | 4.8 | 4.5 | 5.1 | ↓ | -0.6 | 7.3E-06 | 4.2E-03 |
| chr1:24430364-24432562   | 2199 | 5.5 | 5.7 | 5.3 | ↑ | 0.4  | 2.1E-05 | 8.7E-03 |
| chr1:2460230-2465847     | 5618 | 8.7 | 8.6 | 8.8 | ↓ | -0.1 | 4.6E-04 | 8.3E-02 |
| chr1:248236378-248236928 | 551  | 3.3 | 2.6 | 3.8 | ↓ | -1.2 | 7.6E-06 | 4.3E-03 |
| chr1:248239138-248239904 | 767  | 4.7 | 4.4 | 5.0 | ↓ | -0.6 | 5.8E-04 | 9.6E-02 |
| chr1:248240065-248240469 | 405  | 3.4 | 3.1 | 3.8 | ↓ | -0.7 | 2.9E-04 | 6.4E-02 |
| chr1:24825960-24827095   | 1136 | 4.6 | 4.2 | 4.9 | ↓ | -0.7 | 3.3E-04 | 6.9E-02 |
| chr1:248304883-248305174 | 292  | 2.5 | 2.9 | 1.9 | ↑ | 1.0  | 1.5E-04 | 4.1E-02 |
| chr1:24857406-24857638   | 233  | 1.2 | 0.2 | 1.7 | ↓ | -1.5 | 3.3E-04 | 6.9E-02 |
| chr1:248741996-248742682 | 687  | 2.7 | 3.1 | 2.2 | ↑ | 1.0  | 3.1E-04 | 6.6E-02 |
| chr1:25156941-25157353   | 413  | 2.3 | 1.5 | 2.9 | ↓ | -1.3 | 1.4E-05 | 6.5E-03 |
| chr1:2535551-2541607     | 6057 | 8.5 | 8.4 | 8.6 | ↓ | -0.2 | 1.2E-04 | 3.6E-02 |
| chr1:255090164-255090951 | 788  | 3.1 | 3.5 | 2.6 | ↑ | 0.9  | 1.6E-04 | 4.3E-02 |
| chr1:255531337-255532069 | 733  | 3.3 | 2.7 | 3.7 | ↓ | -1.1 | 4.7E-06 | 2.9E-03 |

|                          |      |     |     |     |   |      |         |         |
|--------------------------|------|-----|-----|-----|---|------|---------|---------|
| chr1:256665909-256668072 | 2164 | 5.0 | 4.6 | 5.3 | ↓ | -0.7 | 3.6E-06 | 2.3E-03 |
| chr1:257333896-257334781 | 886  | 4.0 | 3.7 | 4.3 | ↓ | -0.6 | 5.8E-04 | 9.7E-02 |
| chr1:257981105-257981355 | 251  | 1.8 | 0.1 | 2.5 | ↓ | -2.4 | 1.3E-09 | 2.8E-06 |
| chr1:258084833-258085976 | 1144 | 5.2 | 5.0 | 5.4 | ↓ | -0.4 | 6.3E-04 | 1.0E-01 |
| chr1:259387668-259389054 | 1387 | 4.2 | 3.9 | 4.5 | ↓ | -0.6 | 1.4E-04 | 3.9E-02 |
| chr1:259391988-259392473 | 486  | 2.8 | 2.3 | 3.2 | ↓ | -0.9 | 3.2E-04 | 6.8E-02 |
| chr1:259395967-259396389 | 423  | 2.1 | 1.3 | 2.7 | ↓ | -1.3 | 4.0E-05 | 1.4E-02 |
| chr1:261759312-261759889 | 578  | 2.8 | 3.2 | 2.3 | ↑ | 0.9  | 6.2E-04 | 9.9E-02 |
| chr1:261801510-261801790 | 281  | 1.9 | 1.2 | 2.4 | ↓ | -1.2 | 3.2E-04 | 6.8E-02 |
| chr1:261806567-261807230 | 664  | 4.1 | 3.7 | 4.5 | ↓ | -0.8 | 4.3E-07 | 3.8E-04 |
| chr1:261933618-261934580 | 963  | 3.8 | 3.5 | 4.1 | ↓ | -0.7 | 4.6E-05 | 1.6E-02 |
| chr1:261947715-261949010 | 1296 | 4.1 | 3.8 | 4.4 | ↓ | -0.6 | 1.7E-05 | 7.4E-03 |
| chr1:261949353-261950552 | 1200 | 3.8 | 3.5 | 4.1 | ↓ | -0.6 | 4.0E-04 | 7.6E-02 |
| chr1:263299759-263300175 | 417  | 2.2 | 1.5 | 2.7 | ↓ | -1.2 | 7.3E-05 | 2.4E-02 |
| chr1:265397394-265398806 | 1413 | 4.6 | 4.1 | 4.9 | ↓ | -0.8 | 3.6E-05 | 1.3E-02 |
| chr1:265433172-265433839 | 668  | 4.3 | 3.9 | 4.6 | ↓ | -0.6 | 2.3E-05 | 9.4E-03 |
| chr1:265474764-265475916 | 1153 | 5.1 | 4.7 | 5.5 | ↓ | -0.7 | 1.9E-05 | 8.0E-03 |
| chr1:266238243-266238719 | 477  | 2.6 | 3.0 | 2.1 | ↑ | 1.0  | 3.0E-04 | 6.5E-02 |
| chr1:266835475-266835984 | 510  | 2.8 | 2.3 | 3.2 | ↓ | -0.9 | 5.2E-04 | 9.0E-02 |
| chr1:266864477-266865119 | 643  | 3.5 | 3.1 | 3.8 | ↓ | -0.7 | 4.5E-04 | 8.2E-02 |
| chr1:268329155-268331199 | 2045 | 6.0 | 5.9 | 6.1 | ↓ | -0.3 | 5.3E-04 | 9.2E-02 |
| chr1:26837427-26837811   | 385  | 2.4 | 1.8 | 2.8 | ↓ | -1.0 | 4.3E-04 | 8.0E-02 |
| chr1:268953752-268954777 | 1026 | 4.7 | 4.3 | 5.0 | ↓ | -0.7 | 3.8E-07 | 3.5E-04 |
| chr1:269046677-269047747 | 1071 | 5.4 | 5.1 | 5.6 | ↓ | -0.4 | 2.9E-05 | 1.1E-02 |
| chr1:269285958-269286374 | 417  | 2.2 | 1.4 | 2.7 | ↓ | -1.4 | 4.6E-06 | 2.9E-03 |
| chr1:269286692-269287105 | 414  | 1.9 | 0.8 | 2.5 | ↓ | -1.7 | 5.4E-07 | 4.6E-04 |
| chr1:269408199-269408497 | 299  | 2.3 | 2.7 | 1.7 | ↑ | 1.1  | 1.6E-04 | 4.2E-02 |
| chr1:269461875-269462317 | 443  | 3.4 | 3.0 | 3.7 | ↓ | -0.7 | 5.3E-04 | 9.1E-02 |
| chr1:26960071-26960608   | 538  | 3.7 | 3.1 | 4.1 | ↓ | -0.9 | 2.5E-07 | 2.5E-04 |
| chr1:269917047-269918612 | 1566 | 5.8 | 5.5 | 6.1 | ↓ | -0.6 | 1.4E-05 | 6.5E-03 |
| chr1:269918634-269919043 | 410  | 2.9 | 2.4 | 3.3 | ↓ | -0.9 | 7.0E-05 | 2.3E-02 |
| chr1:269920467-269920809 | 343  | 3.0 | 2.6 | 3.4 | ↓ | -0.8 | 2.7E-04 | 6.0E-02 |
| chr1:269921323-269921724 | 402  | 2.1 | 1.4 | 2.6 | ↓ | -1.2 | 1.7E-04 | 4.4E-02 |
| chr1:27170683-27171055   | 373  | 2.3 | 1.6 | 2.7 | ↓ | -1.2 | 2.8E-04 | 6.2E-02 |
| chr1:278271775-278272711 | 937  | 4.4 | 4.0 | 4.7 | ↓ | -0.6 | 1.8E-05 | 7.9E-03 |
| chr1:278504313-278505023 | 711  | 3.3 | 2.2 | 3.9 | ↓ | -1.7 | 4.4E-15 | 3.2E-11 |
| chr1:279062208-279063677 | 1470 | 4.9 | 4.6 | 5.2 | ↓ | -0.6 | 2.0E-06 | 1.4E-03 |
| chr1:279303535-279304215 | 681  | 3.1 | 3.4 | 2.6 | ↑ | 0.8  | 1.6E-04 | 4.3E-02 |
| chr1:280051483-280052092 | 610  | 3.5 | 3.1 | 3.9 | ↓ | -0.7 | 1.8E-04 | 4.5E-02 |
| chr1:280778323-280778787 | 465  | 3.2 | 2.5 | 3.7 | ↓ | -1.2 | 4.8E-08 | 6.1E-05 |
| chr1:284870613-284871938 | 1326 | 4.5 | 4.2 | 4.8 | ↓ | -0.6 | 3.4E-04 | 6.9E-02 |
| chr1:284916867-284918525 | 1659 | 5.6 | 5.4 | 5.8 | ↓ | -0.4 | 3.9E-04 | 7.4E-02 |
| chr1:285025563-285026329 | 767  | 4.4 | 4.0 | 4.6 | ↓ | -0.6 | 6.5E-05 | 2.2E-02 |
| chr1:285938971-285940685 | 1715 | 4.6 | 4.2 | 4.9 | ↓ | -0.7 | 2.5E-05 | 9.8E-03 |
| chr1:285977194-285982495 | 5302 | 7.1 | 6.9 | 7.2 | ↓ | -0.2 | 2.5E-06 | 1.7E-03 |
| chr1:286014672-286016544 | 1873 | 4.9 | 5.1 | 4.7 | ↑ | 0.4  | 5.9E-04 | 9.7E-02 |
| chr1:286827631-286828592 | 962  | 5.5 | 5.1 | 5.9 | ↓ | -0.7 | 4.5E-10 | 1.3E-06 |

|                          |      |     |     |     |   |      |         |         |
|--------------------------|------|-----|-----|-----|---|------|---------|---------|
| chr1:286830470-286831128 | 659  | 4.1 | 3.6 | 4.5 | ↓ | -0.9 | 1.3E-06 | 1.1E-03 |
| chr1:286849609-286850437 | 829  | 4.9 | 4.7 | 5.1 | ↓ | -0.4 | 6.3E-05 | 2.1E-02 |
| chr1:287298292-287299083 | 792  | 3.8 | 3.5 | 4.1 | ↓ | -0.6 | 3.5E-04 | 7.1E-02 |
| chr1:287431166-287431831 | 666  | 2.9 | 3.3 | 2.5 | ↑ | 0.8  | 4.7E-04 | 8.4E-02 |
| chr1:288476950-288477679 | 730  | 3.0 | 3.4 | 2.5 | ↑ | 0.8  | 4.1E-04 | 7.7E-02 |
| chr1:288649691-288650178 | 488  | 3.6 | 3.2 | 3.9 | ↓ | -0.7 | 2.8E-04 | 6.2E-02 |
| chr1:288696853-288697513 | 661  | 3.2 | 3.5 | 2.6 | ↑ | 0.9  | 4.3E-05 | 1.5E-02 |
| chr1:289426963-289427284 | 322  | 1.9 | 1.2 | 2.4 | ↓ | -1.2 | 2.0E-04 | 4.8E-02 |
| chr1:291673335-291674008 | 674  | 4.2 | 3.8 | 4.4 | ↓ | -0.6 | 2.7E-04 | 5.9E-02 |
| chr1:291864494-291865323 | 830  | 3.6 | 3.2 | 3.8 | ↓ | -0.6 | 4.0E-04 | 7.6E-02 |
| chr1:293555624-293556094 | 471  | 2.4 | 1.9 | 2.8 | ↓ | -1.0 | 4.0E-04 | 7.6E-02 |
| chr1:297466605-297467043 | 439  | 3.4 | 3.7 | 3.0 | ↑ | 0.7  | 5.5E-04 | 9.3E-02 |
| chr1:2977960-2980512     | 2553 | 6.8 | 6.7 | 7.0 | ↓ | -0.2 | 9.9E-06 | 5.2E-03 |
| chr1:298127327-298128141 | 815  | 3.9 | 4.2 | 3.4 | ↑ | 0.7  | 7.3E-05 | 2.4E-02 |
| chr1:298695221-298695859 | 639  | 3.4 | 3.0 | 3.7 | ↓ | -0.7 | 1.4E-04 | 3.9E-02 |
| chr1:298723734-298725376 | 1643 | 5.2 | 5.5 | 5.0 | ↑ | 0.5  | 2.7E-05 | 1.0E-02 |
| chr1:299004447-299004772 | 326  | 2.5 | 2.9 | 1.9 | ↑ | 0.9  | 5.1E-04 | 8.9E-02 |
| chr1:299492273-299492679 | 407  | 2.4 | 2.8 | 1.9 | ↑ | 1.0  | 3.9E-04 | 7.4E-02 |
| chr1:299825335-299826031 | 697  | 4.2 | 3.8 | 4.5 | ↓ | -0.7 | 1.6E-05 | 7.2E-03 |
| chr1:300552080-300554197 | 2118 | 5.3 | 5.0 | 5.6 | ↓ | -0.6 | 3.3E-06 | 2.2E-03 |
| chr1:301051865-301052802 | 938  | 3.9 | 3.2 | 4.3 | ↓ | -1.1 | 2.6E-07 | 2.5E-04 |
| chr1:301104326-301105544 | 1219 | 5.1 | 4.8 | 5.3 | ↓ | -0.4 | 6.1E-04 | 9.9E-02 |
| chr1:301254378-301255156 | 779  | 4.3 | 4.0 | 4.5 | ↓ | -0.6 | 3.6E-04 | 7.1E-02 |
| chr1:301619694-301620386 | 693  | 5.4 | 5.0 | 5.6 | ↓ | -0.6 | 5.0E-10 | 1.4E-06 |
| chr1:301631911-301633368 | 1458 | 5.9 | 5.7 | 6.1 | ↓ | -0.3 | 3.0E-04 | 6.4E-02 |
| chr1:302065427-302066537 | 1111 | 4.0 | 3.3 | 4.4 | ↓ | -1.1 | 1.2E-09 | 2.8E-06 |
| chr1:302311986-302313808 | 1823 | 4.9 | 5.3 | 4.5 | ↑ | 0.7  | 1.0E-04 | 3.1E-02 |
| chr1:302548186-302551014 | 2829 | 6.1 | 5.7 | 6.4 | ↓ | -0.7 | 1.1E-09 | 2.5E-06 |
| chr1:303196529-303196898 | 370  | 2.3 | 1.7 | 2.7 | ↓ | -1.0 | 4.7E-04 | 8.5E-02 |
| chr1:303441794-303443706 | 1913 | 5.8 | 5.6 | 6.0 | ↓ | -0.4 | 9.6E-05 | 2.9E-02 |
| chr1:303493953-303495362 | 1410 | 5.8 | 6.1 | 5.5 | ↑ | 0.6  | 3.0E-08 | 4.1E-05 |
| chr1:303749710-303750047 | 338  | 1.7 | 0.8 | 2.3 | ↓ | -1.5 | 3.4E-05 | 1.3E-02 |
| chr1:304279687-304280493 | 807  | 5.0 | 4.8 | 5.2 | ↓ | -0.5 | 1.1E-05 | 5.7E-03 |
| chr1:304409020-304410741 | 1722 | 5.6 | 5.8 | 5.5 | ↑ | 0.3  | 1.4E-04 | 3.9E-02 |
| chr1:304533547-304534020 | 474  | 2.7 | 2.0 | 3.2 | ↓ | -1.2 | 3.4E-05 | 1.3E-02 |
| chr1:304540842-304541827 | 986  | 5.1 | 4.8 | 5.4 | ↓ | -0.5 | 1.5E-04 | 4.1E-02 |
| chr1:305256824-305257472 | 649  | 3.8 | 3.5 | 4.1 | ↓ | -0.6 | 4.6E-04 | 8.3E-02 |
| chr1:305465806-305466491 | 686  | 4.2 | 3.9 | 4.4 | ↓ | -0.6 | 1.1E-04 | 3.4E-02 |
| chr1:305589149-305590006 | 858  | 4.3 | 4.6 | 4.1 | ↑ | 0.5  | 2.2E-04 | 5.1E-02 |
| chr1:305669249-305669934 | 686  | 4.5 | 4.3 | 4.7 | ↓ | -0.4 | 4.9E-04 | 8.8E-02 |
| chr1:305956065-305956774 | 710  | 5.3 | 5.1 | 5.5 | ↓ | -0.5 | 9.3E-05 | 2.9E-02 |
| chr1:306111869-306112506 | 638  | 5.1 | 4.7 | 5.4 | ↓ | -0.7 | 1.6E-05 | 7.3E-03 |
| chr1:306374565-306379978 | 5414 | 7.6 | 7.5 | 7.7 | ↓ | -0.2 | 1.0E-05 | 5.2E-03 |
| chr1:306908919-306910314 | 1396 | 6.4 | 6.1 | 6.6 | ↓ | -0.5 | 1.8E-05 | 7.9E-03 |
| chr1:307135779-307143457 | 7679 | 7.9 | 7.9 | 8.0 | ↓ | -0.2 | 7.7E-06 | 4.3E-03 |
| chr1:307149662-307156580 | 6919 | 7.9 | 7.8 | 7.9 | ↓ | -0.1 | 5.4E-04 | 9.2E-02 |
| chr1:307498325-307499012 | 688  | 4.4 | 4.1 | 4.6 | ↓ | -0.5 | 2.3E-04 | 5.3E-02 |

|                          |      |     |     |     |   |      |         |         |
|--------------------------|------|-----|-----|-----|---|------|---------|---------|
| chr1:307636292-307644957 | 8666 | 8.9 | 8.8 | 8.9 | ↓ | -0.2 | 2.5E-08 | 3.5E-05 |
| chr1:307920059-307926578 | 6520 | 8.4 | 8.3 | 8.5 | ↓ | -0.2 | 1.0E-05 | 5.2E-03 |
| chr1:308377264-308379832 | 2569 | 7.1 | 6.9 | 7.2 | ↓ | -0.3 | 3.2E-04 | 6.7E-02 |
| chr1:308660765-308670086 | 9322 | 9.1 | 9.0 | 9.2 | ↓ | -0.2 | 2.0E-04 | 4.8E-02 |
| chr1:308700700-308707497 | 6798 | 8.5 | 8.4 | 8.7 | ↓ | -0.3 | 1.1E-07 | 1.3E-04 |
| chr1:309257578-309258438 | 861  | 4.1 | 4.4 | 3.8 | ↑ | 0.6  | 2.6E-04 | 5.9E-02 |
| chr1:310103777-310104476 | 700  | 2.2 | 2.7 | 1.5 | ↑ | 1.1  | 3.2E-04 | 6.8E-02 |
| chr1:311242718-311243578 | 861  | 3.8 | 4.1 | 3.4 | ↑ | 0.7  | 1.5E-04 | 4.1E-02 |
| chr1:311712723-311714686 | 1964 | 5.9 | 6.1 | 5.8 | ↑ | 0.3  | 5.0E-04 | 8.8E-02 |
| chr1:311922269-311922695 | 427  | 4.1 | 3.8 | 4.4 | ↓ | -0.6 | 2.5E-05 | 9.8E-03 |
| chr1:314085330-314088714 | 3385 | 7.2 | 7.1 | 7.4 | ↓ | -0.3 | 3.7E-07 | 3.4E-04 |
| chr1:3193261-3195620     | 2360 | 6.0 | 5.8 | 6.2 | ↓ | -0.4 | 3.0E-05 | 1.1E-02 |
| chr1:3346901-3350094     | 3194 | 7.2 | 7.1 | 7.3 | ↓ | -0.2 | 1.4E-05 | 6.5E-03 |
| chr1:33598147-33598729   | 583  | 4.1 | 3.8 | 4.4 | ↓ | -0.6 | 3.7E-05 | 1.3E-02 |
| chr1:3408899-3412949     | 4051 | 7.7 | 7.6 | 7.8 | ↓ | -0.2 | 1.1E-04 | 3.3E-02 |
| chr1:34177024-34177283   | 260  | 2.0 | 2.5 | 1.2 | ↑ | 1.4  | 2.5E-05 | 9.9E-03 |
| chr1:35233508-35233836   | 329  | 1.9 | 1.2 | 2.3 | ↓ | -1.2 | 3.5E-04 | 7.0E-02 |
| chr1:35708127-35708531   | 405  | 3.3 | 2.9 | 3.7 | ↓ | -0.8 | 2.1E-04 | 5.0E-02 |
| chr1:3664185-3665104     | 920  | 5.4 | 5.3 | 5.6 | ↓ | -0.3 | 3.8E-04 | 7.4E-02 |
| chr1:37117401-37118167   | 767  | 3.3 | 2.8 | 3.6 | ↓ | -0.8 | 1.6E-04 | 4.3E-02 |
| chr1:38618336-38619359   | 1024 | 3.3 | 2.8 | 3.6 | ↓ | -0.8 | 8.6E-05 | 2.7E-02 |
| chr1:38650707-38651204   | 498  | 3.5 | 3.0 | 3.8 | ↓ | -0.8 | 4.4E-05 | 1.5E-02 |
| chr1:38771211-38772509   | 1299 | 4.5 | 4.2 | 4.7 | ↓ | -0.5 | 3.8E-05 | 1.4E-02 |
| chr1:387923-388477       | 555  | 4.7 | 4.4 | 4.9 | ↓ | -0.5 | 1.3E-04 | 3.7E-02 |
| chr1:40569921-40570412   | 492  | 2.3 | 1.7 | 2.7 | ↓ | -1.0 | 6.2E-04 | 9.9E-02 |
| chr1:4177406-4178081     | 676  | 4.6 | 4.1 | 4.9 | ↓ | -0.8 | 1.7E-08 | 2.4E-05 |
| chr1:4184374-4185352     | 979  | 4.0 | 3.7 | 4.3 | ↓ | -0.5 | 4.1E-04 | 7.7E-02 |
| chr1:42074231-42074810   | 580  | 4.4 | 4.0 | 4.7 | ↓ | -0.7 | 1.8E-04 | 4.5E-02 |
| chr1:45249260-45249621   | 362  | 2.4 | 1.8 | 2.9 | ↓ | -1.1 | 5.4E-04 | 9.2E-02 |
| chr1:45426746-45427469   | 724  | 2.7 | 3.1 | 2.2 | ↑ | 0.9  | 3.7E-04 | 7.4E-02 |
| chr1:45947457-45947711   | 255  | 2.2 | 1.5 | 2.7 | ↓ | -1.1 | 1.5E-04 | 4.1E-02 |
| chr1:4670822-4672685     | 1864 | 6.5 | 6.3 | 6.7 | ↓ | -0.4 | 8.7E-09 | 1.4E-05 |
| chr1:47820983-47821591   | 609  | 2.9 | 2.3 | 3.3 | ↓ | -1.0 | 1.1E-04 | 3.3E-02 |
| chr1:4816140-4817223     | 1084 | 4.5 | 4.1 | 4.8 | ↓ | -0.7 | 1.2E-05 | 6.1E-03 |
| chr1:48513733-48514802   | 1070 | 4.2 | 3.9 | 4.5 | ↓ | -0.6 | 1.0E-04 | 3.0E-02 |
| chr1:49337284-49337510   | 227  | 2.0 | 1.0 | 2.5 | ↓ | -1.5 | 7.3E-06 | 4.2E-03 |
| chr1:502210-502653       | 444  | 4.3 | 3.7 | 4.6 | ↓ | -0.9 | 2.2E-09 | 4.7E-06 |
| chr1:507934-508534       | 601  | 4.9 | 4.6 | 5.1 | ↓ | -0.5 | 5.6E-05 | 1.9E-02 |
| chr1:52880133-52880524   | 392  | 2.0 | 2.4 | 1.4 | ↑ | 1.1  | 5.0E-04 | 8.8E-02 |
| chr1:560555-563468       | 2914 | 7.5 | 7.4 | 7.7 | ↓ | -0.3 | 5.7E-05 | 1.9E-02 |
| chr1:57849283-57849598   | 316  | 2.3 | 1.8 | 2.7 | ↓ | -1.0 | 5.5E-04 | 9.3E-02 |
| chr1:58923010-58923513   | 504  | 3.1 | 3.5 | 2.5 | ↑ | 1.0  | 4.4E-06 | 2.8E-03 |
| chr1:58988929-58990365   | 1437 | 5.1 | 5.4 | 4.7 | ↑ | 0.7  | 4.5E-07 | 4.0E-04 |
| chr1:6011974-6012905     | 932  | 5.3 | 5.1 | 5.5 | ↓ | -0.4 | 5.6E-04 | 9.4E-02 |
| chr1:60327316-60328977   | 1662 | 5.6 | 5.9 | 5.3 | ↑ | 0.6  | 8.9E-06 | 4.8E-03 |
| chr1:65051474-65052967   | 1494 | 4.3 | 4.5 | 4.0 | ↑ | 0.5  | 3.4E-04 | 7.0E-02 |
| chr1:6532769-6533153     | 385  | 2.2 | 2.6 | 1.6 | ↑ | 1.1  | 6.2E-04 | 9.9E-02 |



|                         |      |     |     |     |   |      |         |         |
|-------------------------|------|-----|-----|-----|---|------|---------|---------|
| chr1:6535966-6536391    | 426  | 2.2 | 2.7 | 1.6 | ↑ | 1.1  | 3.6E-04 | 7.2E-02 |
| chr1:65479342-65479713  | 372  | 2.7 | 3.1 | 2.1 | ↑ | 0.9  | 2.5E-04 | 5.8E-02 |
| chr1:7077449-7077943    | 495  | 2.6 | 3.0 | 2.0 | ↑ | 1.0  | 3.9E-04 | 7.4E-02 |
| chr1:7331450-7332017    | 568  | 4.1 | 3.7 | 4.4 | ↓ | -0.7 | 3.1E-04 | 6.6E-02 |
| chr1:73389807-73390785  | 979  | 4.6 | 4.2 | 4.9 | ↓ | -0.7 | 1.3E-06 | 1.0E-03 |
| chr1:75632639-75633137  | 499  | 2.4 | 1.6 | 3.0 | ↓ | -1.4 | 6.6E-07 | 5.4E-04 |
| chr1:760663-761127      | 465  | 2.1 | 1.5 | 2.6 | ↓ | -1.1 | 4.9E-04 | 8.7E-02 |
| chr1:76884335-76884889  | 555  | 3.4 | 3.9 | 2.7 | ↑ | 1.2  | 1.3E-05 | 6.5E-03 |
| chr1:83242899-83243416  | 518  | 3.1 | 2.6 | 3.4 | ↓ | -0.8 | 5.6E-04 | 9.4E-02 |
| chr1:8364257-8364665    | 409  | 3.0 | 2.3 | 3.5 | ↓ | -1.2 | 3.7E-07 | 3.4E-04 |
| chr1:83972591-83973167  | 577  | 2.8 | 2.3 | 3.3 | ↓ | -1.0 | 1.5E-04 | 4.1E-02 |
| chr1:84283679-84284484  | 806  | 3.9 | 3.2 | 4.4 | ↓ | -1.1 | 2.0E-10 | 6.8E-07 |
| chr1:84323207-84324622  | 1416 | 4.7 | 4.4 | 4.9 | ↓ | -0.5 | 1.5E-04 | 4.1E-02 |
| chr1:8619162-8619454    | 293  | 2.0 | 1.1 | 2.5 | ↓ | -1.4 | 1.9E-05 | 7.9E-03 |
| chr1:86703912-86704396  | 485  | 2.6 | 3.1 | 1.8 | ↑ | 1.3  | 1.9E-06 | 1.4E-03 |
| chr1:87167420-87170288  | 2869 | 6.1 | 5.9 | 6.3 | ↓ | -0.5 | 5.4E-04 | 9.3E-02 |
| chr1:87192325-87192965  | 641  | 3.3 | 3.7 | 2.9 | ↑ | 0.8  | 2.6E-04 | 5.9E-02 |
| chr1:87193-89842        | 2650 | 7.7 | 7.6 | 7.8 | ↓ | -0.2 | 1.3E-04 | 3.7E-02 |
| chr1:88080994-88081617  | 624  | 3.0 | 3.3 | 2.5 | ↑ | 0.8  | 2.3E-04 | 5.4E-02 |
| chr1:89102728-89103434  | 707  | 4.6 | 4.2 | 5.0 | ↓ | -0.9 | 6.5E-10 | 1.6E-06 |
| chr1:89536078-89536731  | 654  | 4.0 | 3.7 | 4.3 | ↓ | -0.6 | 6.2E-04 | 9.9E-02 |
| chr1:92164880-92165408  | 529  | 3.0 | 3.4 | 2.5 | ↑ | 0.8  | 4.1E-04 | 7.7E-02 |
| chr1:94007875-94008554  | 680  | 2.8 | 3.2 | 2.3 | ↑ | 0.8  | 6.3E-04 | 1.0E-01 |
| chr1:9469418-9469959    | 542  | 3.0 | 3.4 | 2.5 | ↑ | 0.8  | 1.8E-04 | 4.5E-02 |
| chr1:95089126-95092501  | 3376 | 6.3 | 6.6 | 6.0 | ↑ | 0.6  | 6.2E-11 | 2.4E-07 |
| chr1:95604322-95604626  | 305  | 2.4 | 1.7 | 2.9 | ↓ | -1.2 | 1.8E-05 | 7.9E-03 |
| chr1:96966738-96967050  | 313  | 1.8 | 1.1 | 2.3 | ↓ | -1.2 | 3.8E-04 | 7.4E-02 |
| chr1:97166218-97166744  | 527  | 2.7 | 3.1 | 2.2 | ↑ | 0.9  | 4.3E-04 | 7.9E-02 |
| chr1:97176947-97178807  | 1861 | 5.3 | 4.3 | 5.9 | ↓ | -1.6 | 2.8E-53 | 1.8E-48 |
| chr1:97179907-97180964  | 1058 | 4.0 | 2.6 | 4.7 | ↓ | -2.0 | 7.6E-20 | 1.2E-15 |
| chr1:97528117-97528918  | 802  | 3.3 | 2.8 | 3.6 | ↓ | -0.8 | 1.3E-04 | 3.7E-02 |
| chr1:97542772-97543559  | 788  | 3.1 | 2.5 | 3.5 | ↓ | -1.0 | 9.1E-06 | 4.9E-03 |
| chr1:97563730-97564016  | 287  | 2.0 | 1.3 | 2.5 | ↓ | -1.2 | 2.7E-04 | 5.9E-02 |
| chr1:97574440-97575281  | 842  | 3.4 | 2.6 | 3.9 | ↓ | -1.3 | 7.6E-11 | 2.8E-07 |
| chr1:97703748-97704039  | 292  | 2.3 | 1.4 | 2.8 | ↓ | -1.4 | 5.0E-06 | 3.0E-03 |
| chr1:98050120-98050380  | 261  | 1.8 | 2.3 | 1.1 | ↑ | 1.2  | 4.6E-04 | 8.3E-02 |
| chr1:9845900-9846487    | 588  | 3.4 | 3.7 | 3.0 | ↑ | 0.7  | 4.8E-04 | 8.5E-02 |
| chr1:99461207-99461582  | 376  | 2.3 | 1.6 | 2.8 | ↓ | -1.2 | 6.5E-05 | 2.2E-02 |
| chr10:10062911-10063227 | 317  | 3.5 | 3.1 | 3.8 | ↓ | -0.7 | 1.7E-04 | 4.4E-02 |
| chr10:10183468-10183752 | 285  | 2.1 | 2.5 | 1.5 | ↑ | 1.1  | 4.4E-04 | 8.1E-02 |
| chr10:10632071-10633089 | 1019 | 5.1 | 4.8 | 5.3 | ↓ | -0.5 | 4.1E-05 | 1.6E-02 |
| chr10:10733490-10733951 | 462  | 3.8 | 3.2 | 4.2 | ↓ | -1.0 | 3.9E-07 | 3.2E-04 |
| chr10:10734546-10735261 | 716  | 4.7 | 5.0 | 4.3 | ↑ | 0.7  | 1.4E-06 | 1.0E-03 |
| chr10:11017628-11017989 | 362  | 3.9 | 3.3 | 4.3 | ↓ | -1.0 | 2.7E-07 | 2.5E-04 |
| chr10:11322329-11322766 | 438  | 3.9 | 3.5 | 4.1 | ↓ | -0.6 | 2.7E-04 | 5.8E-02 |
| chr10:11363598-11364229 | 632  | 4.6 | 4.0 | 5.1 | ↓ | -1.1 | 3.5E-16 | 2.4E-12 |
| chr10:11862483-11864521 | 2039 | 6.8 | 6.6 | 6.9 | ↓ | -0.3 | 3.0E-06 | 2.0E-03 |

|                         |      |     |     |     |   |      |         |         |
|-------------------------|------|-----|-----|-----|---|------|---------|---------|
| chr10:12452836-12453407 | 572  | 3.3 | 3.7 | 2.9 | ↑ | 0.8  | 8.2E-05 | 2.8E-02 |
| chr10:12579047-12579497 | 451  | 4.1 | 3.4 | 4.5 | ↓ | -1.1 | 5.0E-11 | 1.4E-07 |
| chr10:12640738-12641343 | 606  | 5.5 | 5.2 | 5.7 | ↓ | -0.5 | 4.7E-04 | 8.5E-02 |
| chr10:12820762-12821563 | 802  | 4.2 | 3.7 | 4.6 | ↓ | -0.9 | 3.8E-07 | 3.2E-04 |
| chr10:12890359-12890676 | 318  | 3.2 | 2.8 | 3.5 | ↓ | -0.7 | 2.8E-04 | 6.1E-02 |
| chr10:13935735-13936189 | 455  | 2.9 | 2.4 | 3.2 | ↓ | -0.8 | 4.1E-04 | 7.9E-02 |
| chr10:13937017-13937473 | 457  | 4.3 | 4.5 | 4.0 | ↑ | 0.5  | 1.1E-04 | 3.4E-02 |
| chr10:14792830-14793427 | 598  | 4.5 | 4.0 | 4.9 | ↓ | -0.9 | 3.6E-08 | 4.3E-05 |
| chr10:15292279-15293196 | 918  | 4.8 | 4.5 | 5.1 | ↓ | -0.6 | 8.0E-06 | 4.4E-03 |
| chr10:15331814-15333183 | 1370 | 5.3 | 5.1 | 5.5 | ↓ | -0.4 | 8.2E-05 | 2.8E-02 |
| chr10:16084850-16085177 | 328  | 3.5 | 3.0 | 3.9 | ↓ | -0.9 | 1.7E-05 | 7.9E-03 |
| chr10:1635065-1635473   | 409  | 3.0 | 2.4 | 3.4 | ↓ | -1.0 | 1.9E-04 | 4.6E-02 |
| chr10:16659018-16659747 | 730  | 4.4 | 4.1 | 4.7 | ↓ | -0.6 | 2.8E-04 | 6.0E-02 |
| chr10:16739854-16740408 | 555  | 4.1 | 3.7 | 4.3 | ↓ | -0.6 | 3.4E-04 | 7.0E-02 |
| chr10:17191053-17191309 | 257  | 2.1 | 2.5 | 1.4 | ↑ | 1.1  | 3.4E-04 | 7.0E-02 |
| chr10:17877111-17877618 | 508  | 3.4 | 2.9 | 3.7 | ↓ | -0.8 | 9.4E-05 | 3.0E-02 |
| chr10:19056316-19056742 | 427  | 3.4 | 3.0 | 3.7 | ↓ | -0.7 | 5.6E-04 | 9.3E-02 |
| chr10:19093032-19094384 | 1353 | 6.4 | 6.3 | 6.5 | ↓ | -0.3 | 1.6E-04 | 4.2E-02 |
| chr10:19446896-19447137 | 242  | 1.9 | 2.4 | 1.2 | ↑ | 1.2  | 3.9E-04 | 7.8E-02 |
| chr10:20400980-20401480 | 501  | 4.1 | 3.7 | 4.4 | ↓ | -0.7 | 6.6E-05 | 2.4E-02 |
| chr10:21097558-21098605 | 1048 | 4.8 | 4.5 | 5.1 | ↓ | -0.6 | 1.0E-05 | 5.3E-03 |
| chr10:21099017-21100589 | 1573 | 5.8 | 5.6 | 6.1 | ↓ | -0.5 | 1.4E-05 | 6.5E-03 |
| chr10:21103872-21104283 | 412  | 3.4 | 2.9 | 3.7 | ↓ | -0.8 | 8.6E-05 | 2.8E-02 |
| chr10:2130956-2131422   | 467  | 4.1 | 3.8 | 4.4 | ↓ | -0.7 | 1.8E-05 | 7.9E-03 |
| chr10:21882139-21882439 | 301  | 2.2 | 2.8 | 1.1 | ↑ | 1.6  | 1.0E-07 | 1.1E-04 |
| chr10:21884472-21884953 | 482  | 3.4 | 3.8 | 3.0 | ↑ | 0.8  | 1.3E-05 | 6.2E-03 |
| chr10:22009477-22009911 | 435  | 3.6 | 3.1 | 3.9 | ↓ | -0.8 | 1.1E-05 | 5.7E-03 |
| chr10:22010284-22010598 | 315  | 2.9 | 2.2 | 3.4 | ↓ | -1.3 | 2.8E-07 | 2.5E-04 |
| chr10:22033416-22033741 | 326  | 2.4 | 2.8 | 1.8 | ↑ | 1.0  | 2.0E-04 | 4.8E-02 |
| chr10:22243639-22244634 | 996  | 3.3 | 3.6 | 2.8 | ↑ | 0.8  | 2.8E-04 | 6.0E-02 |
| chr10:22993630-22993848 | 219  | 2.2 | 1.5 | 2.7 | ↓ | -1.2 | 3.0E-04 | 6.3E-02 |
| chr10:23645531-23645794 | 264  | 3.1 | 2.6 | 3.4 | ↓ | -0.8 | 3.0E-04 | 6.3E-02 |
| chr10:23751898-23752530 | 633  | 5.1 | 4.4 | 5.5 | ↓ | -1.1 | 1.5E-10 | 3.4E-07 |
| chr10:24948217-24948500 | 284  | 3.1 | 2.4 | 3.6 | ↓ | -1.2 | 1.9E-06 | 1.3E-03 |
| chr10:24970673-24971206 | 534  | 4.8 | 4.5 | 5.0 | ↓ | -0.5 | 4.3E-04 | 8.0E-02 |
| chr10:25200326-25200700 | 375  | 3.4 | 3.7 | 3.0 | ↑ | 0.7  | 5.1E-04 | 8.8E-02 |
| chr10:25283919-25284454 | 536  | 5.0 | 4.8 | 5.2 | ↓ | -0.5 | 1.3E-04 | 3.7E-02 |
| chr10:25479984-25480841 | 858  | 4.7 | 4.4 | 5.0 | ↓ | -0.6 | 8.9E-06 | 4.6E-03 |
| chr10:26257638-26257948 | 311  | 3.2 | 2.7 | 3.5 | ↓ | -0.9 | 2.4E-04 | 5.5E-02 |
| chr10:26680940-26681298 | 359  | 4.3 | 3.8 | 4.6 | ↓ | -0.9 | 1.8E-06 | 1.2E-03 |
| chr10:26732255-26732740 | 486  | 4.3 | 3.9 | 4.5 | ↓ | -0.6 | 5.6E-04 | 9.4E-02 |
| chr10:26738239-26738624 | 386  | 4.3 | 3.8 | 4.6 | ↓ | -0.9 | 1.1E-07 | 1.1E-04 |
| chr10:27123819-27124336 | 518  | 4.6 | 4.4 | 4.8 | ↓ | -0.4 | 3.9E-04 | 7.7E-02 |
| chr10:27585612-27586556 | 945  | 5.1 | 4.6 | 5.5 | ↓ | -0.9 | 1.4E-12 | 4.7E-09 |
| chr10:27923582-27924071 | 490  | 3.7 | 3.1 | 4.1 | ↓ | -1.0 | 6.4E-07 | 5.0E-04 |
| chr10:28389173-28389444 | 272  | 3.1 | 2.5 | 3.5 | ↓ | -1.1 | 7.6E-05 | 2.6E-02 |
| chr10:28617022-28617595 | 574  | 4.3 | 4.5 | 4.0 | ↑ | 0.5  | 4.1E-04 | 7.9E-02 |

|                         |      |      |      |      |   |      |         |         |
|-------------------------|------|------|------|------|---|------|---------|---------|
| chr10:28666165-28667254 | 1090 | 5.1  | 4.7  | 5.4  | ↓ | -0.8 | 3.3E-08 | 4.1E-05 |
| chr10:28758667-28760344 | 1678 | 5.9  | 6.1  | 5.7  | ↑ | 0.3  | 1.5E-04 | 4.0E-02 |
| chr10:28840963-28841676 | 714  | 5.8  | 5.7  | 6.0  | ↓ | -0.3 | 8.9E-05 | 2.9E-02 |
| chr10:28842870-28843295 | 426  | 3.1  | 2.1  | 3.6  | ↓ | -1.5 | 1.4E-10 | 3.4E-07 |
| chr10:28843507-28843963 | 457  | 4.0  | 3.6  | 4.2  | ↓ | -0.6 | 1.7E-04 | 4.5E-02 |
| chr10:29275439-29275891 | 453  | 3.6  | 3.8  | 3.2  | ↑ | 0.6  | 5.0E-04 | 8.6E-02 |
| chr10:29445514-29448853 | 3340 | 11.3 | 11.2 | 11.4 | ↓ | -0.1 | 2.5E-05 | 1.1E-02 |
| chr10:29510029-29510357 | 329  | 2.9  | 3.3  | 2.5  | ↑ | 0.8  | 3.7E-04 | 7.4E-02 |
| chr10:30061866-30062223 | 358  | 2.7  | 2.1  | 3.1  | ↓ | -0.9 | 1.4E-04 | 3.9E-02 |
| chr10:30068432-30068852 | 421  | 2.7  | 2.1  | 3.1  | ↓ | -1.1 | 6.5E-05 | 2.4E-02 |
| chr10:30568923-30569341 | 419  | 2.6  | 3.0  | 2.0  | ↑ | 1.0  | 2.0E-04 | 4.8E-02 |
| chr10:30806044-30806450 | 407  | 2.3  | 2.7  | 1.7  | ↑ | 1.0  | 4.2E-04 | 7.9E-02 |
| chr10:31217655-31218599 | 945  | 4.8  | 4.4  | 5.1  | ↓ | -0.6 | 1.0E-04 | 3.2E-02 |
| chr10:31305405-31305949 | 545  | 3.6  | 3.2  | 3.9  | ↓ | -0.8 | 2.2E-04 | 5.1E-02 |
| chr10:31307468-31310241 | 2774 | 6.7  | 6.5  | 6.8  | ↓ | -0.2 | 4.1E-04 | 7.9E-02 |
| chr10:31734026-31734631 | 606  | 2.8  | 2.2  | 3.3  | ↓ | -1.1 | 2.1E-04 | 4.9E-02 |
| chr10:32181294-32181924 | 631  | 3.5  | 2.8  | 4.0  | ↓ | -1.2 | 4.5E-08 | 5.2E-05 |
| chr10:32189511-32190111 | 601  | 3.8  | 3.3  | 4.1  | ↓ | -0.8 | 1.7E-04 | 4.5E-02 |
| chr10:32634772-32634929 | 158  | 1.6  | 0.8  | 2.1  | ↓ | -1.3 | 3.0E-04 | 6.3E-02 |
| chr10:32809575-32811063 | 1489 | 6.6  | 6.3  | 6.9  | ↓ | -0.7 | 2.1E-13 | 9.1E-10 |
| chr10:33115024-33115457 | 434  | 3.4  | 2.7  | 3.9  | ↓ | -1.2 | 1.4E-07 | 1.3E-04 |
| chr10:3414912-3415819   | 908  | 6.7  | 6.6  | 6.9  | ↓ | -0.3 | 8.8E-06 | 4.6E-03 |
| chr10:34533641-34533872 | 232  | 2.9  | 2.4  | 3.3  | ↓ | -0.9 | 4.4E-04 | 8.1E-02 |
| chr10:3519463-3519962   | 500  | 3.7  | 4.0  | 3.3  | ↑ | 0.7  | 5.2E-04 | 8.8E-02 |
| chr10:36008118-36008572 | 455  | 4.9  | 4.7  | 5.1  | ↓ | -0.4 | 2.5E-04 | 5.7E-02 |
| chr10:36334934-36335585 | 652  | 3.3  | 3.6  | 2.8  | ↑ | 0.7  | 2.7E-04 | 5.8E-02 |
| chr10:36366633-36368534 | 1902 | 6.5  | 6.6  | 6.4  | ↑ | 0.2  | 3.4E-04 | 7.0E-02 |
| chr10:42247282-42247480 | 199  | 2.2  | 1.4  | 2.7  | ↓ | -1.3 | 7.0E-06 | 3.9E-03 |
| chr10:44364008-44364265 | 258  | 2.0  | 2.5  | 1.3  | ↑ | 1.2  | 1.3E-04 | 3.7E-02 |
| chr10:45254995-45255227 | 233  | 2.7  | 2.1  | 3.2  | ↓ | -1.1 | 5.1E-04 | 8.8E-02 |
| chr10:45387502-45387935 | 434  | 3.2  | 2.4  | 3.7  | ↓ | -1.3 | 1.6E-06 | 1.1E-03 |
| chr10:45390285-45390538 | 254  | 2.9  | 1.9  | 3.5  | ↓ | -1.6 | 3.0E-09 | 4.7E-06 |
| chr10:45404036-45406479 | 2444 | 6.2  | 5.6  | 6.6  | ↓ | -1.0 | 9.7E-23 | 1.7E-18 |
| chr10:45407390-45408962 | 1573 | 5.4  | 4.7  | 5.9  | ↓ | -1.3 | 7.2E-18 | 8.3E-14 |
| chr10:45414420-45414834 | 415  | 3.5  | 3.0  | 3.9  | ↓ | -0.9 | 5.2E-05 | 2.0E-02 |
| chr10:45416390-45417007 | 618  | 3.9  | 3.2  | 4.4  | ↓ | -1.3 | 8.0E-12 | 2.5E-08 |
| chr10:45418205-45419488 | 1284 | 6.1  | 5.9  | 6.4  | ↓ | -0.5 | 3.6E-06 | 2.2E-03 |
| chr10:45420106-45421593 | 1488 | 5.0  | 4.4  | 5.5  | ↓ | -1.1 | 7.7E-15 | 3.8E-11 |
| chr10:45421688-45422286 | 599  | 4.8  | 4.4  | 5.0  | ↓ | -0.6 | 1.0E-04 | 3.2E-02 |
| chr10:45422333-45422882 | 550  | 3.8  | 3.4  | 4.1  | ↓ | -0.8 | 1.3E-05 | 6.1E-03 |
| chr10:45895813-45896222 | 410  | 3.6  | 3.1  | 3.9  | ↓ | -0.9 | 1.1E-04 | 3.3E-02 |
| chr10:46636825-46637071 | 247  | 2.7  | 3.1  | 2.2  | ↑ | 0.9  | 2.8E-04 | 6.0E-02 |
| chr10:47007400-47007721 | 322  | 2.2  | 1.6  | 2.7  | ↓ | -1.1 | 1.1E-04 | 3.4E-02 |
| chr10:47432927-47433347 | 421  | 2.5  | 1.9  | 2.9  | ↓ | -1.0 | 2.5E-04 | 5.7E-02 |
| chr10:47902348-47902729 | 382  | 2.7  | 3.1  | 2.1  | ↑ | 1.0  | 2.6E-04 | 5.8E-02 |
| chr10:47913960-47914334 | 375  | 3.2  | 2.7  | 3.5  | ↓ | -0.8 | 1.5E-04 | 4.0E-02 |
| chr10:47914874-47915594 | 721  | 5.0  | 4.8  | 5.2  | ↓ | -0.4 | 1.8E-04 | 4.6E-02 |

|                         |      |     |     |     |   |      |         |         |
|-------------------------|------|-----|-----|-----|---|------|---------|---------|
| chr10:48730593-48730906 | 314  | 3.4 | 3.8 | 3.0 | ↑ | 0.8  | 8.3E-05 | 2.8E-02 |
| chr10:5079565-5079978   | 414  | 3.4 | 3.0 | 3.8 | ↓ | -0.7 | 1.8E-04 | 4.6E-02 |
| chr10:52155931-52156124 | 194  | 1.7 | 0.9 | 2.2 | ↓ | -1.4 | 1.2E-04 | 3.5E-02 |
| chr10:52276314-52276653 | 340  | 3.9 | 4.2 | 3.7 | ↑ | 0.5  | 5.2E-04 | 8.8E-02 |
| chr10:52468130-52468957 | 828  | 5.3 | 4.7 | 5.7 | ↓ | -1.0 | 4.4E-09 | 6.7E-06 |
| chr10:52642076-52642339 | 264  | 2.7 | 2.2 | 3.1 | ↓ | -0.9 | 4.2E-04 | 7.9E-02 |
| chr10:52723183-52723381 | 199  | 2.2 | 1.6 | 2.6 | ↓ | -1.0 | 4.8E-04 | 8.6E-02 |
| chr10:52767619-52767884 | 266  | 2.4 | 2.8 | 1.8 | ↑ | 1.1  | 1.9E-04 | 4.6E-02 |
| chr10:5283539-5283997   | 459  | 4.4 | 4.1 | 4.7 | ↓ | -0.5 | 3.2E-04 | 6.6E-02 |
| chr10:53743202-53744150 | 949  | 5.3 | 5.6 | 4.9 | ↑ | 0.7  | 9.9E-09 | 1.4E-05 |
| chr10:54071823-54072144 | 322  | 3.7 | 4.0 | 3.4 | ↑ | 0.7  | 5.1E-04 | 8.8E-02 |
| chr10:56142221-56142855 | 635  | 3.7 | 3.2 | 4.0 | ↓ | -0.8 | 1.7E-06 | 1.2E-03 |
| chr10:56238304-56238586 | 283  | 2.6 | 2.0 | 3.1 | ↓ | -1.1 | 6.9E-05 | 2.4E-02 |
| chr10:57882522-57883006 | 485  | 3.2 | 2.8 | 3.5 | ↓ | -0.8 | 2.4E-04 | 5.5E-02 |
| chr10:58394687-58394890 | 204  | 2.0 | 2.4 | 1.3 | ↑ | 1.1  | 4.2E-04 | 7.9E-02 |
| chr10:59231367-59232009 | 643  | 4.7 | 4.5 | 4.9 | ↓ | -0.4 | 5.0E-04 | 8.6E-02 |
| chr10:59566814-59567084 | 271  | 2.3 | 1.6 | 2.8 | ↓ | -1.2 | 2.5E-05 | 1.1E-02 |
| chr10:59603519-59603761 | 243  | 3.1 | 2.6 | 3.6 | ↓ | -1.0 | 8.1E-06 | 4.4E-03 |
| chr10:60756658-60757527 | 870  | 5.5 | 5.3 | 5.7 | ↓ | -0.4 | 4.7E-05 | 1.8E-02 |
| chr10:61592522-61592816 | 295  | 2.5 | 2.9 | 2.0 | ↑ | 0.9  | 5.7E-04 | 9.4E-02 |
| chr10:61787126-61787378 | 253  | 2.4 | 2.8 | 1.8 | ↑ | 1.0  | 4.3E-04 | 7.9E-02 |
| chr10:61932447-61932759 | 313  | 2.6 | 3.0 | 1.9 | ↑ | 1.2  | 4.2E-06 | 2.5E-03 |
| chr10:62270854-62271209 | 356  | 3.6 | 3.3 | 3.9 | ↓ | -0.6 | 4.9E-04 | 8.6E-02 |
| chr10:62284828-62285764 | 937  | 5.7 | 5.0 | 6.2 | ↓ | -1.2 | 1.4E-16 | 1.2E-12 |
| chr10:62442946-62443534 | 589  | 4.2 | 3.5 | 4.6 | ↓ | -1.1 | 7.5E-08 | 8.3E-05 |
| chr10:62514792-62515949 | 1158 | 5.5 | 5.3 | 5.7 | ↓ | -0.3 | 1.3E-04 | 3.7E-02 |
| chr10:62684861-62685269 | 409  | 3.5 | 2.6 | 4.0 | ↓ | -1.4 | 1.7E-11 | 4.8E-08 |
| chr10:62770257-62772040 | 1784 | 5.7 | 5.3 | 5.9 | ↓ | -0.6 | 2.1E-09 | 3.7E-06 |
| chr10:62822977-62823190 | 214  | 1.7 | 0.8 | 2.3 | ↓ | -1.4 | 6.3E-05 | 2.3E-02 |
| chr10:62824442-62825726 | 1285 | 4.9 | 4.7 | 5.1 | ↓ | -0.4 | 3.4E-04 | 6.9E-02 |
| chr10:62878598-62879163 | 566  | 3.9 | 3.6 | 4.2 | ↓ | -0.6 | 5.2E-04 | 8.8E-02 |
| chr10:62927490-62927910 | 421  | 2.6 | 2.0 | 3.1 | ↓ | -1.1 | 1.7E-04 | 4.4E-02 |
| chr10:63090723-63091658 | 936  | 4.4 | 4.0 | 4.8 | ↓ | -0.8 | 2.0E-09 | 3.7E-06 |
| chr10:63091768-63092478 | 711  | 3.7 | 3.3 | 4.0 | ↓ | -0.7 | 5.0E-05 | 2.0E-02 |
| chr10:63123899-63124718 | 820  | 4.3 | 3.9 | 4.5 | ↓ | -0.6 | 1.4E-05 | 6.7E-03 |
| chr10:63175445-63176231 | 787  | 5.0 | 4.7 | 5.2 | ↓ | -0.5 | 4.0E-05 | 1.6E-02 |
| chr10:64242463-64242739 | 277  | 3.0 | 2.5 | 3.4 | ↓ | -0.9 | 1.2E-04 | 3.5E-02 |
| chr10:64636522-64636872 | 351  | 2.5 | 3.0 | 1.7 | ↑ | 1.3  | 2.6E-05 | 1.1E-02 |
| chr10:64901254-64902155 | 902  | 3.9 | 4.1 | 3.5 | ↑ | 0.7  | 1.3E-04 | 3.7E-02 |
| chr10:65121660-65122157 | 498  | 3.7 | 3.3 | 4.0 | ↓ | -0.7 | 1.2E-04 | 3.5E-02 |
| chr10:65424268-65425109 | 842  | 5.0 | 5.2 | 4.8 | ↑ | 0.4  | 2.1E-04 | 5.0E-02 |
| chr10:65425918-65426504 | 587  | 4.6 | 4.2 | 4.9 | ↓ | -0.7 | 3.3E-06 | 2.1E-03 |
| chr10:6576629-6577099   | 471  | 3.6 | 3.1 | 3.9 | ↓ | -0.8 | 1.9E-04 | 4.6E-02 |
| chr10:6577159-6577535   | 377  | 2.7 | 2.2 | 3.1 | ↓ | -0.9 | 3.7E-04 | 7.5E-02 |
| chr10:6580671-6580996   | 326  | 3.9 | 3.4 | 4.3 | ↓ | -0.9 | 3.4E-06 | 2.2E-03 |
| chr10:65816023-65816865 | 843  | 5.6 | 5.4 | 5.7 | ↓ | -0.3 | 4.1E-04 | 7.9E-02 |
| chr10:65861950-65863323 | 1374 | 6.0 | 5.8 | 6.2 | ↓ | -0.4 | 4.0E-05 | 1.6E-02 |

|                         |      |     |     |     |   |      |         |         |
|-------------------------|------|-----|-----|-----|---|------|---------|---------|
| chr10:65863783-65865821 | 2039 | 6.5 | 6.3 | 6.7 | ↓ | -0.5 | 2.9E-07 | 2.5E-04 |
| chr10:65880257-65881895 | 1639 | 6.3 | 6.1 | 6.5 | ↓ | -0.4 | 6.0E-06 | 3.5E-03 |
| chr10:65884409-65885267 | 859  | 6.1 | 5.9 | 6.3 | ↓ | -0.5 | 1.8E-04 | 4.5E-02 |
| chr10:65887578-65888094 | 517  | 3.9 | 3.1 | 4.4 | ↓ | -1.3 | 4.3E-13 | 1.7E-09 |
| chr10:66721560-66721707 | 148  | 1.5 | 0.7 | 2.0 | ↓ | -1.3 | 4.1E-04 | 7.9E-02 |
| chr10:67999011-67999588 | 578  | 4.2 | 3.7 | 4.6 | ↓ | -0.9 | 3.3E-08 | 4.1E-05 |
| chr10:68225059-68225430 | 372  | 2.8 | 2.0 | 3.3 | ↓ | -1.3 | 5.2E-07 | 4.2E-04 |
| chr10:68231343-68231595 | 253  | 1.7 | 0.8 | 2.2 | ↓ | -1.5 | 6.0E-05 | 2.3E-02 |
| chr10:68323663-68324012 | 350  | 2.7 | 3.1 | 2.0 | ↑ | 1.1  | 6.4E-05 | 2.3E-02 |
| chr10:69125868-69126375 | 508  | 4.0 | 3.5 | 4.4 | ↓ | -1.0 | 3.6E-06 | 2.2E-03 |
| chr10:69143428-69143851 | 424  | 3.2 | 2.4 | 3.6 | ↓ | -1.2 | 1.2E-08 | 1.6E-05 |
| chr10:69156751-69157132 | 382  | 2.7 | 2.1 | 3.1 | ↓ | -1.0 | 1.2E-04 | 3.5E-02 |
| chr10:69354455-69354862 | 408  | 4.2 | 3.7 | 4.6 | ↓ | -0.9 | 2.7E-09 | 4.4E-06 |
| chr10:69472857-69473380 | 524  | 3.7 | 3.4 | 4.0 | ↓ | -0.7 | 4.9E-04 | 8.6E-02 |
| chr10:69544440-69545914 | 1475 | 5.5 | 5.3 | 5.7 | ↓ | -0.4 | 8.4E-05 | 2.8E-02 |
| chr10:69653554-69654036 | 483  | 3.1 | 2.4 | 3.5 | ↓ | -1.1 | 1.6E-05 | 7.5E-03 |
| chr10:69815586-69816074 | 489  | 3.0 | 2.1 | 3.5 | ↓ | -1.4 | 9.6E-08 | 1.0E-04 |
| chr10:69842949-69844048 | 1100 | 4.7 | 4.1 | 5.1 | ↓ | -1.0 | 4.9E-15 | 2.8E-11 |
| chr10:69856203-69858094 | 1892 | 5.9 | 5.8 | 6.1 | ↓ | -0.3 | 1.1E-04 | 3.4E-02 |
| chr10:69858136-69858968 | 833  | 4.4 | 4.0 | 4.7 | ↓ | -0.7 | 1.5E-04 | 4.1E-02 |
| chr10:69898433-69898760 | 328  | 2.6 | 2.0 | 3.0 | ↓ | -1.0 | 1.7E-04 | 4.4E-02 |
| chr10:70220088-70220871 | 784  | 5.9 | 5.7 | 6.1 | ↓ | -0.4 | 6.1E-06 | 3.5E-03 |
| chr10:70340693-70341152 | 460  | 3.5 | 3.0 | 3.9 | ↓ | -0.9 | 7.4E-07 | 5.7E-04 |
| chr10:70405254-70405843 | 590  | 5.2 | 5.0 | 5.4 | ↓ | -0.4 | 2.4E-04 | 5.4E-02 |
| chr10:70551793-70552704 | 912  | 4.2 | 3.9 | 4.5 | ↓ | -0.6 | 5.2E-05 | 2.0E-02 |
| chr10:70874259-70876329 | 2071 | 6.6 | 6.4 | 6.7 | ↓ | -0.3 | 4.4E-06 | 2.6E-03 |
| chr10:71074500-71074804 | 305  | 2.3 | 1.5 | 2.8 | ↓ | -1.3 | 1.2E-05 | 5.9E-03 |
| chr10:71430323-71432217 | 1895 | 7.7 | 7.6 | 7.8 | ↓ | -0.2 | 1.8E-04 | 4.6E-02 |
| chr10:71434998-71436244 | 1247 | 4.7 | 4.5 | 5.0 | ↓ | -0.5 | 1.1E-04 | 3.4E-02 |
| chr10:71489243-71490860 | 1618 | 5.9 | 5.7 | 6.1 | ↓ | -0.4 | 4.6E-05 | 1.8E-02 |
| chr10:7235610-7235977   | 368  | 2.0 | 2.5 | 1.3 | ↑ | 1.2  | 2.6E-04 | 5.8E-02 |
| chr10:72546225-72546761 | 537  | 3.7 | 3.3 | 4.0 | ↓ | -0.7 | 2.0E-04 | 4.8E-02 |
| chr10:72910283-72911250 | 968  | 4.2 | 3.7 | 4.6 | ↓ | -0.9 | 1.9E-09 | 3.7E-06 |
| chr10:72911350-72911724 | 375  | 4.2 | 3.8 | 4.5 | ↓ | -0.7 | 3.7E-05 | 1.6E-02 |
| chr10:73180279-73180774 | 496  | 2.6 | 2.0 | 3.0 | ↓ | -1.0 | 1.9E-04 | 4.6E-02 |
| chr10:73231694-73232223 | 530  | 4.9 | 4.4 | 5.2 | ↓ | -0.8 | 6.3E-09 | 9.2E-06 |
| chr10:7349397-7349683   | 287  | 3.0 | 2.5 | 3.4 | ↓ | -0.9 | 4.2E-04 | 7.9E-02 |
| chr10:73714593-73714970 | 378  | 3.5 | 3.1 | 3.8 | ↓ | -0.7 | 1.2E-04 | 3.5E-02 |
| chr10:73786723-73787159 | 437  | 4.0 | 3.6 | 4.3 | ↓ | -0.7 | 2.6E-06 | 1.7E-03 |
| chr10:73798440-73799125 | 686  | 4.7 | 4.4 | 4.9 | ↓ | -0.5 | 5.8E-04 | 9.5E-02 |
| chr10:73869504-73870596 | 1093 | 5.0 | 4.8 | 5.2 | ↓ | -0.4 | 5.8E-04 | 9.5E-02 |
| chr10:73876630-73877039 | 410  | 4.3 | 3.9 | 4.6 | ↓ | -0.8 | 8.4E-06 | 4.5E-03 |
| chr10:73879812-73880521 | 710  | 5.6 | 5.2 | 6.0 | ↓ | -0.8 | 5.8E-10 | 1.3E-06 |
| chr10:73880979-73881511 | 533  | 4.6 | 4.2 | 4.9 | ↓ | -0.7 | 7.8E-07 | 5.9E-04 |
| chr10:74062504-74062983 | 480  | 3.0 | 2.5 | 3.3 | ↓ | -0.8 | 4.9E-04 | 8.6E-02 |
| chr10:74260443-74261975 | 1533 | 5.6 | 5.4 | 5.8 | ↓ | -0.4 | 4.7E-04 | 8.5E-02 |
| chr10:74637093-74637635 | 543  | 3.1 | 2.4 | 3.5 | ↓ | -1.1 | 2.0E-07 | 1.9E-04 |

|                         |      |     |     |     |   |      |         |         |
|-------------------------|------|-----|-----|-----|---|------|---------|---------|
| chr10:74781106-74783070 | 1965 | 6.7 | 6.6 | 6.8 | ↓ | -0.2 | 4.7E-04 | 8.5E-02 |
| chr10:74784834-74785122 | 289  | 2.5 | 1.7 | 3.0 | ↓ | -1.2 | 1.6E-05 | 7.4E-03 |
| chr10:74940948-74941713 | 766  | 5.4 | 5.3 | 5.6 | ↓ | -0.4 | 1.2E-04 | 3.5E-02 |
| chr10:75056819-75057271 | 453  | 3.3 | 2.8 | 3.7 | ↓ | -0.9 | 2.6E-05 | 1.1E-02 |
| chr10:76436309-76436979 | 671  | 5.3 | 5.0 | 5.6 | ↓ | -0.6 | 4.4E-04 | 8.1E-02 |
| chr10:8056775-8057498   | 724  | 5.3 | 5.1 | 5.6 | ↓ | -0.5 | 1.1E-07 | 1.1E-04 |
| chr10:8079895-8080178   | 284  | 2.9 | 2.4 | 3.3 | ↓ | -0.8 | 2.2E-04 | 5.2E-02 |
| chr10:8644797-8645156   | 360  | 4.7 | 3.9 | 5.2 | ↓ | -1.3 | 1.1E-23 | 3.6E-19 |
| chr10:8665951-8666552   | 602  | 3.6 | 3.2 | 4.0 | ↓ | -0.7 | 1.1E-04 | 3.4E-02 |
| chr10:8672911-8673218   | 308  | 3.2 | 2.3 | 3.8 | ↓ | -1.5 | 8.0E-10 | 1.6E-06 |
| chr10:8841845-8842451   | 607  | 4.0 | 3.6 | 4.3 | ↓ | -0.7 | 7.6E-05 | 2.6E-02 |
| chr10:8938311-8938880   | 570  | 4.0 | 3.7 | 4.3 | ↓ | -0.6 | 5.7E-05 | 2.1E-02 |
| chr10:9377962-9378219   | 258  | 2.4 | 1.8 | 2.8 | ↓ | -0.9 | 4.9E-04 | 8.6E-02 |
| chr10:9430682-9431034   | 353  | 2.0 | 2.5 | 1.4 | ↑ | 1.1  | 3.9E-04 | 7.7E-02 |
| chr11:10182940-10183292 | 353  | 2.5 | 2.9 | 2.0 | ↑ | 1.0  | 3.7E-04 | 5.8E-02 |
| chr11:10189766-10190100 | 335  | 3.8 | 4.1 | 3.3 | ↑ | 0.9  | 2.5E-06 | 1.6E-03 |
| chr11:10190337-10191342 | 1006 | 5.2 | 5.0 | 5.4 | ↓ | -0.4 | 2.9E-04 | 5.0E-02 |
| chr11:10326962-10327375 | 414  | 3.9 | 3.3 | 4.2 | ↓ | -0.9 | 3.0E-07 | 3.2E-04 |
| chr11:1065092-1066149   | 1058 | 5.4 | 5.1 | 5.6 | ↓ | -0.4 | 4.9E-06 | 2.5E-03 |
| chr11:10791415-10792265 | 851  | 4.8 | 4.5 | 5.1 | ↓ | -0.5 | 1.4E-05 | 5.4E-03 |
| chr11:1128228-1132028   | 3801 | 8.2 | 8.2 | 8.3 | ↓ | -0.1 | 2.2E-04 | 4.2E-02 |
| chr11:11606657-11607624 | 968  | 4.6 | 4.4 | 4.8 | ↓ | -0.4 | 5.8E-04 | 7.7E-02 |
| chr11:11609078-11609517 | 440  | 2.3 | 2.7 | 1.6 | ↑ | 1.1  | 3.0E-04 | 5.0E-02 |
| chr11:12030227-12030570 | 344  | 2.8 | 3.2 | 2.2 | ↑ | 0.9  | 3.3E-04 | 5.3E-02 |
| chr11:12336194-12336416 | 223  | 2.5 | 1.8 | 3.0 | ↓ | -1.2 | 8.4E-06 | 3.6E-03 |
| chr11:1289199-1290054   | 856  | 5.1 | 4.8 | 5.3 | ↓ | -0.5 | 3.2E-05 | 1.0E-02 |
| chr11:13803605-13804044 | 440  | 4.0 | 3.5 | 4.3 | ↓ | -0.9 | 1.5E-07 | 1.9E-04 |
| chr11:14107961-14108547 | 587  | 4.4 | 4.2 | 4.7 | ↓ | -0.5 | 6.5E-04 | 8.4E-02 |
| chr11:14204067-14204305 | 239  | 1.9 | 1.1 | 2.4 | ↓ | -1.2 | 1.4E-04 | 2.8E-02 |
| chr11:14636475-14637063 | 589  | 4.8 | 4.5 | 5.0 | ↓ | -0.6 | 6.2E-05 | 1.7E-02 |
| chr11:15253998-15254317 | 320  | 2.9 | 3.2 | 2.4 | ↑ | 0.8  | 6.7E-04 | 8.6E-02 |
| chr11:15304561-15307335 | 2775 | 7.1 | 7.0 | 7.2 | ↓ | -0.2 | 4.7E-04 | 6.7E-02 |
| chr11:15553130-15553772 | 643  | 4.2 | 3.9 | 4.5 | ↓ | -0.6 | 3.5E-05 | 1.1E-02 |
| chr11:16561457-16562481 | 1025 | 4.6 | 4.9 | 4.4 | ↑ | 0.5  | 6.2E-05 | 1.7E-02 |
| chr11:16675009-16675421 | 413  | 2.5 | 2.9 | 1.9 | ↑ | 1.0  | 3.2E-04 | 5.3E-02 |
| chr11:18000308-18000736 | 429  | 3.6 | 3.9 | 3.2 | ↑ | 0.7  | 2.0E-04 | 3.9E-02 |
| chr11:18193564-18193922 | 359  | 3.0 | 3.4 | 2.5 | ↑ | 0.9  | 6.9E-05 | 1.8E-02 |
| chr11:19105926-19106318 | 393  | 2.5 | 1.8 | 3.0 | ↓ | -1.3 | 2.2E-06 | 1.4E-03 |
| chr11:19353702-19354008 | 307  | 3.0 | 2.5 | 3.4 | ↓ | -0.8 | 2.2E-04 | 4.1E-02 |
| chr11:1941605-1942227   | 623  | 3.8 | 3.4 | 4.2 | ↓ | -0.8 | 6.2E-06 | 2.9E-03 |
| chr11:19447885-19449181 | 1297 | 5.1 | 4.9 | 5.3 | ↓ | -0.4 | 1.3E-04 | 2.7E-02 |
| chr11:19747851-19748324 | 474  | 3.8 | 3.4 | 4.1 | ↓ | -0.7 | 1.3E-04 | 2.7E-02 |
| chr11:20055690-20056083 | 394  | 3.8 | 3.0 | 4.3 | ↓ | -1.3 | 3.6E-12 | 2.4E-08 |
| chr11:20223526-20223817 | 292  | 3.5 | 3.0 | 3.9 | ↓ | -0.9 | 2.6E-06 | 1.6E-03 |
| chr11:20389626-20390520 | 895  | 4.3 | 4.0 | 4.6 | ↓ | -0.7 | 2.2E-06 | 1.4E-03 |
| chr11:20981271-20981766 | 496  | 2.9 | 2.4 | 3.3 | ↓ | -0.9 | 1.1E-04 | 2.5E-02 |
| chr11:21055942-21058214 | 2273 | 5.7 | 6.0 | 5.5 | ↑ | 0.4  | 1.2E-06 | 9.0E-04 |

|                         |      |     |     |     |   |      |         |         |
|-------------------------|------|-----|-----|-----|---|------|---------|---------|
| chr11:21066561-21066909 | 349  | 3.7 | 4.1 | 3.2 | ↑ | 0.9  | 7.3E-07 | 6.1E-04 |
| chr11:21069934-21071423 | 1490 | 5.2 | 5.5 | 5.0 | ↑ | 0.5  | 4.9E-06 | 2.5E-03 |
| chr11:21079348-21079761 | 414  | 2.8 | 3.1 | 2.3 | ↑ | 0.8  | 7.4E-04 | 9.3E-02 |
| chr11:21143478-21143697 | 220  | 2.2 | 2.6 | 1.5 | ↑ | 1.1  | 4.6E-04 | 6.6E-02 |
| chr11:21972074-21972637 | 564  | 3.9 | 3.4 | 4.2 | ↓ | -0.8 | 6.2E-05 | 1.7E-02 |
| chr11:22072253-22072705 | 453  | 2.5 | 2.0 | 2.9 | ↓ | -1.0 | 2.7E-04 | 4.8E-02 |
| chr11:2210460-2212110   | 1651 | 5.4 | 5.1 | 5.7 | ↓ | -0.5 | 2.1E-06 | 1.4E-03 |
| chr11:22110750-22111330 | 581  | 2.9 | 3.3 | 2.4 | ↑ | 0.9  | 2.0E-04 | 3.8E-02 |
| chr11:2276228-2276425   | 198  | 2.0 | 2.5 | 1.1 | ↑ | 1.4  | 7.7E-06 | 3.4E-03 |
| chr11:236787-237092     | 306  | 2.1 | 2.5 | 1.4 | ↑ | 1.1  | 5.6E-04 | 7.7E-02 |
| chr11:23815302-23815829 | 528  | 4.8 | 4.6 | 5.0 | ↓ | -0.4 | 5.7E-04 | 7.7E-02 |
| chr11:23862440-23863525 | 1086 | 5.9 | 5.5 | 6.1 | ↓ | -0.6 | 5.4E-09 | 1.1E-05 |
| chr11:23870994-23871691 | 698  | 4.5 | 4.2 | 4.7 | ↓ | -0.5 | 1.3E-04 | 2.8E-02 |
| chr11:24014073-24014381 | 309  | 3.9 | 3.5 | 4.2 | ↓ | -0.8 | 4.9E-06 | 2.5E-03 |
| chr11:24102098-24103100 | 1003 | 4.4 | 4.0 | 4.6 | ↓ | -0.6 | 5.4E-05 | 1.5E-02 |
| chr11:2413598-2415419   | 1822 | 6.4 | 6.2 | 6.5 | ↓ | -0.3 | 3.6E-06 | 2.1E-03 |
| chr11:24143698-24144608 | 911  | 4.9 | 4.5 | 5.2 | ↓ | -0.8 | 2.6E-11 | 9.7E-08 |
| chr11:25106335-25106774 | 440  | 2.9 | 3.3 | 2.4 | ↑ | 0.9  | 2.0E-04 | 3.9E-02 |
| chr11:25250853-25251394 | 542  | 2.8 | 3.2 | 2.3 | ↑ | 0.9  | 2.9E-04 | 5.0E-02 |
| chr11:25345307-25346652 | 1346 | 5.7 | 5.5 | 5.9 | ↓ | -0.3 | 3.0E-04 | 5.0E-02 |
| chr11:26006711-26006998 | 288  | 2.7 | 2.2 | 3.1 | ↓ | -0.9 | 3.9E-04 | 6.1E-02 |
| chr11:26023842-26024719 | 878  | 3.8 | 3.5 | 4.1 | ↓ | -0.6 | 1.6E-04 | 3.2E-02 |
| chr11:2661663-2663081   | 1419 | 6.0 | 5.8 | 6.2 | ↓ | -0.3 | 1.8E-04 | 3.5E-02 |
| chr11:26759919-26760591 | 673  | 3.5 | 3.1 | 3.8 | ↓ | -0.7 | 3.1E-04 | 5.1E-02 |
| chr11:27324552-27324915 | 364  | 2.6 | 2.1 | 3.0 | ↓ | -0.9 | 6.6E-04 | 8.6E-02 |
| chr11:2810808-2811920   | 1113 | 5.1 | 4.8 | 5.3 | ↓ | -0.5 | 2.8E-06 | 1.6E-03 |
| chr11:28153562-28154449 | 888  | 5.3 | 5.1 | 5.5 | ↓ | -0.4 | 5.2E-04 | 7.2E-02 |
| chr11:2845891-2847442   | 1552 | 5.7 | 5.5 | 5.9 | ↓ | -0.4 | 1.8E-06 | 1.3E-03 |
| chr11:29017852-29018161 | 310  | 2.3 | 1.7 | 2.7 | ↓ | -1.0 | 3.9E-04 | 6.1E-02 |
| chr11:2908956-2909288   | 333  | 3.0 | 2.4 | 3.4 | ↓ | -1.0 | 1.1E-05 | 4.5E-03 |
| chr11:2966217-2966971   | 755  | 3.3 | 2.9 | 3.6 | ↓ | -0.7 | 3.5E-04 | 5.6E-02 |
| chr11:298627-299139     | 513  | 3.7 | 3.1 | 4.1 | ↓ | -1.0 | 1.6E-07 | 2.0E-04 |
| chr11:299499-301047     | 1549 | 7.4 | 7.2 | 7.6 | ↓ | -0.4 | 2.8E-06 | 1.6E-03 |
| chr11:3089567-3091499   | 1933 | 6.5 | 6.2 | 6.7 | ↓ | -0.5 | 2.2E-08 | 3.7E-05 |
| chr11:3098627-3098994   | 368  | 2.4 | 1.9 | 2.8 | ↓ | -0.9 | 7.0E-04 | 9.0E-02 |
| chr11:32001130-32001709 | 580  | 2.6 | 2.0 | 3.1 | ↓ | -1.0 | 5.8E-04 | 7.7E-02 |
| chr11:32002392-32003328 | 937  | 3.7 | 3.1 | 4.1 | ↓ | -1.0 | 8.0E-07 | 6.4E-04 |
| chr11:32513536-32513801 | 266  | 2.7 | 2.2 | 3.1 | ↓ | -1.0 | 1.3E-04 | 2.7E-02 |
| chr11:3337847-3338244   | 398  | 3.2 | 2.7 | 3.5 | ↓ | -0.8 | 7.4E-04 | 9.3E-02 |
| chr11:3354140-3354527   | 388  | 3.0 | 2.5 | 3.4 | ↓ | -0.9 | 7.4E-04 | 9.3E-02 |
| chr11:33808229-33808595 | 367  | 2.3 | 1.5 | 2.8 | ↓ | -1.3 | 3.9E-06 | 2.2E-03 |
| chr11:33858954-33860520 | 1567 | 5.4 | 5.1 | 5.7 | ↓ | -0.6 | 1.3E-05 | 5.1E-03 |
| chr11:33862865-33863863 | 999  | 5.0 | 4.6 | 5.3 | ↓ | -0.6 | 2.2E-05 | 7.5E-03 |
| chr11:33881630-33882040 | 411  | 3.3 | 2.9 | 3.6 | ↓ | -0.8 | 2.3E-04 | 4.3E-02 |
| chr11:3909501-3910088   | 588  | 3.6 | 3.2 | 3.9 | ↓ | -0.8 | 4.7E-05 | 1.4E-02 |
| chr11:4007746-4008461   | 716  | 4.4 | 4.2 | 4.6 | ↓ | -0.5 | 4.9E-04 | 6.9E-02 |
| chr11:417715-418457     | 743  | 3.9 | 3.5 | 4.2 | ↓ | -0.7 | 2.8E-04 | 4.9E-02 |

|                         |      |     |     |     |   |      |         |         |
|-------------------------|------|-----|-----|-----|---|------|---------|---------|
| chr11:4236076-4236465   | 390  | 3.7 | 3.3 | 4.0 | ↓ | -0.7 | 4.4E-04 | 6.5E-02 |
| chr11:43015353-43015695 | 343  | 2.5 | 1.9 | 2.9 | ↓ | -1.0 | 1.1E-04 | 2.5E-02 |
| chr11:430757-431523     | 767  | 5.4 | 5.3 | 5.6 | ↓ | -0.3 | 5.7E-04 | 7.7E-02 |
| chr11:48445169-48445526 | 358  | 2.4 | 1.6 | 2.9 | ↓ | -1.3 | 1.2E-06 | 9.0E-04 |
| chr11:49236516-49236902 | 387  | 4.4 | 4.1 | 4.6 | ↓ | -0.5 | 1.2E-04 | 2.6E-02 |
| chr11:50717791-50718333 | 543  | 4.9 | 4.5 | 5.1 | ↓ | -0.6 | 1.2E-05 | 4.9E-03 |
| chr11:52066690-52067796 | 1107 | 4.1 | 4.5 | 3.5 | ↑ | 1.0  | 5.8E-06 | 2.8E-03 |
| chr11:53150025-53150387 | 363  | 2.3 | 2.7 | 1.6 | ↑ | 1.1  | 2.9E-04 | 5.0E-02 |
| chr11:5332936-5333426   | 491  | 3.8 | 4.2 | 3.2 | ↑ | 1.0  | 9.7E-09 | 1.7E-05 |
| chr11:5341859-5343590   | 1732 | 6.1 | 6.2 | 6.0 | ↑ | 0.3  | 5.8E-04 | 7.7E-02 |
| chr11:53522999-53523325 | 327  | 3.4 | 2.9 | 3.8 | ↓ | -0.8 | 1.4E-04 | 2.9E-02 |
| chr11:53596937-53597487 | 551  | 2.6 | 2.1 | 3.0 | ↓ | -0.9 | 5.7E-04 | 7.7E-02 |
| chr11:54086172-54086435 | 264  | 1.8 | 0.9 | 2.4 | ↓ | -1.4 | 6.9E-05 | 1.8E-02 |
| chr11:55560872-55561284 | 413  | 5.1 | 4.8 | 5.4 | ↓ | -0.6 | 1.6E-05 | 5.9E-03 |
| chr11:55831796-55832335 | 540  | 3.3 | 2.8 | 3.7 | ↓ | -0.9 | 8.4E-05 | 2.0E-02 |
| chr11:56495017-56495661 | 645  | 4.5 | 4.1 | 4.7 | ↓ | -0.6 | 5.1E-06 | 2.6E-03 |
| chr11:5661169-5661894   | 726  | 4.7 | 4.3 | 5.0 | ↓ | -0.8 | 9.3E-07 | 7.2E-04 |
| chr11:5737912-5738554   | 643  | 5.3 | 5.0 | 5.5 | ↓ | -0.5 | 1.1E-04 | 2.5E-02 |
| chr11:57509289-57509694 | 406  | 3.4 | 3.0 | 3.7 | ↓ | -0.7 | 2.3E-04 | 4.3E-02 |
| chr11:57529098-57529285 | 188  | 1.7 | 0.5 | 2.3 | ↓ | -1.9 | 3.3E-07 | 3.4E-04 |
| chr11:5784199-5785238   | 1040 | 5.3 | 4.8 | 5.6 | ↓ | -0.8 | 2.0E-12 | 1.8E-08 |
| chr11:5886174-5887454   | 1281 | 6.0 | 5.8 | 6.1 | ↓ | -0.3 | 5.3E-04 | 7.4E-02 |
| chr11:597493-598397     | 905  | 5.2 | 5.4 | 5.0 | ↑ | 0.4  | 3.3E-04 | 5.3E-02 |
| chr11:6003105-6003541   | 437  | 4.5 | 4.2 | 4.8 | ↓ | -0.6 | 7.4E-06 | 3.4E-03 |
| chr11:60393474-60393753 | 280  | 2.1 | 2.6 | 1.4 | ↑ | 1.2  | 5.6E-05 | 1.6E-02 |
| chr11:6073489-6073878   | 390  | 2.5 | 1.9 | 2.9 | ↓ | -0.9 | 3.3E-04 | 5.3E-02 |
| chr11:6105830-6107855   | 2026 | 6.2 | 5.9 | 6.5 | ↓ | -0.5 | 4.6E-11 | 1.3E-07 |
| chr11:61676729-61677001 | 273  | 2.2 | 2.7 | 1.7 | ↑ | 1.0  | 4.7E-04 | 6.7E-02 |
| chr11:643365-644658     | 1294 | 6.2 | 5.9 | 6.5 | ↓ | -0.6 | 3.8E-07 | 3.8E-04 |
| chr11:65488118-65489107 | 990  | 5.2 | 5.0 | 5.4 | ↓ | -0.4 | 6.4E-04 | 8.4E-02 |
| chr11:65630688-65630902 | 215  | 1.8 | 0.8 | 2.3 | ↓ | -1.5 | 2.0E-05 | 7.4E-03 |
| chr11:6575599-6575900   | 302  | 2.5 | 1.8 | 3.0 | ↓ | -1.2 | 1.5E-05 | 5.8E-03 |
| chr11:66216846-66217057 | 212  | 2.1 | 1.5 | 2.6 | ↓ | -1.0 | 7.5E-04 | 9.4E-02 |
| chr11:6635636-6637193   | 1558 | 6.5 | 6.3 | 6.6 | ↓ | -0.3 | 7.6E-05 | 1.9E-02 |
| chr11:66578852-66579158 | 307  | 2.9 | 2.3 | 3.2 | ↓ | -0.9 | 2.4E-04 | 4.4E-02 |
| chr11:6836833-6837405   | 573  | 4.8 | 4.3 | 5.1 | ↓ | -0.8 | 7.4E-07 | 6.1E-04 |
| chr11:69087957-69088280 | 324  | 3.1 | 2.5 | 3.5 | ↓ | -1.0 | 7.4E-06 | 3.4E-03 |
| chr11:69088418-69088812 | 395  | 3.0 | 2.5 | 3.4 | ↓ | -0.9 | 4.8E-05 | 1.4E-02 |
| chr11:6920955-6921286   | 332  | 3.1 | 2.3 | 3.6 | ↓ | -1.3 | 3.6E-08 | 5.5E-05 |
| chr11:6922462-6923323   | 862  | 5.2 | 4.9 | 5.4 | ↓ | -0.5 | 4.4E-04 | 6.5E-02 |
| chr11:69397621-69398090 | 470  | 2.4 | 2.9 | 1.8 | ↑ | 1.1  | 9.4E-05 | 2.2E-02 |
| chr11:69958098-69958942 | 845  | 4.5 | 4.2 | 4.8 | ↓ | -0.5 | 2.4E-04 | 4.4E-02 |
| chr11:70457442-70457809 | 368  | 2.6 | 2.1 | 3.0 | ↓ | -0.9 | 3.2E-04 | 5.3E-02 |
| chr11:72413155-72413469 | 315  | 2.4 | 1.8 | 2.8 | ↓ | -0.9 | 5.7E-04 | 7.7E-02 |
| chr11:73194409-73195095 | 687  | 4.3 | 3.9 | 4.6 | ↓ | -0.7 | 3.7E-06 | 2.1E-03 |
| chr11:7323442-7324317   | 876  | 5.2 | 4.9 | 5.4 | ↓ | -0.5 | 2.1E-05 | 7.4E-03 |
| chr11:7364250-7364498   | 249  | 2.3 | 1.8 | 2.7 | ↓ | -1.0 | 7.8E-04 | 9.6E-02 |



|                         |      |     |     |     |   |      |         |         |
|-------------------------|------|-----|-----|-----|---|------|---------|---------|
| chr11:73907227-73907597 | 371  | 2.3 | 2.7 | 1.8 | ↑ | 0.9  | 6.3E-04 | 8.2E-02 |
| chr11:7391431-7391902   | 472  | 5.4 | 5.2 | 5.7 | ↓ | -0.5 | 4.8E-07 | 4.5E-04 |
| chr11:73940194-73941102 | 909  | 4.5 | 4.2 | 4.8 | ↓ | -0.6 | 2.6E-05 | 8.7E-03 |
| chr11:7431879-7432146   | 268  | 2.1 | 2.5 | 1.4 | ↑ | 1.1  | 4.4E-04 | 6.5E-02 |
| chr11:74900541-74900929 | 389  | 3.6 | 3.2 | 3.9 | ↓ | -0.7 | 1.1E-04 | 2.5E-02 |
| chr11:75621908-75622499 | 592  | 5.2 | 5.0 | 5.5 | ↓ | -0.5 | 2.8E-04 | 4.9E-02 |
| chr11:75891520-75892101 | 582  | 4.5 | 4.1 | 4.8 | ↓ | -0.6 | 1.3E-05 | 5.1E-03 |
| chr11:75985174-75985794 | 621  | 3.7 | 3.9 | 3.3 | ↑ | 0.6  | 4.2E-04 | 6.3E-02 |
| chr11:76031817-76032349 | 533  | 3.7 | 3.3 | 3.9 | ↓ | -0.7 | 3.7E-04 | 5.8E-02 |
| chr11:76372793-76373270 | 478  | 3.4 | 2.7 | 3.9 | ↓ | -1.2 | 6.1E-09 | 1.2E-05 |
| chr11:76490273-76490615 | 343  | 1.9 | 0.9 | 2.5 | ↓ | -1.5 | 8.0E-06 | 3.5E-03 |
| chr11:76541875-76544594 | 2720 | 7.6 | 7.7 | 7.5 | ↑ | 0.2  | 5.0E-05 | 1.4E-02 |
| chr11:76722019-76722487 | 469  | 3.5 | 3.1 | 3.8 | ↓ | -0.7 | 1.1E-04 | 2.5E-02 |
| chr11:76752191-76752917 | 727  | 4.9 | 4.6 | 5.1 | ↓ | -0.6 | 4.9E-06 | 2.5E-03 |
| chr11:76831709-76832371 | 663  | 5.5 | 5.3 | 5.7 | ↓ | -0.4 | 3.4E-05 | 1.1E-02 |
| chr11:77021483-77022000 | 518  | 6.0 | 5.8 | 6.1 | ↓ | -0.3 | 3.7E-04 | 5.8E-02 |
| chr11:771615-773418     | 1804 | 7.1 | 7.0 | 7.2 | ↓ | -0.2 | 6.7E-05 | 1.8E-02 |
| chr11:78172767-78173124 | 358  | 2.6 | 2.0 | 3.0 | ↓ | -1.1 | 3.5E-05 | 1.1E-02 |
| chr11:78912542-78912967 | 426  | 3.6 | 3.0 | 4.0 | ↓ | -1.0 | 3.7E-08 | 5.5E-05 |
| chr11:78934470-78934697 | 228  | 1.5 | 0.7 | 2.1 | ↓ | -1.3 | 5.1E-04 | 7.1E-02 |
| chr11:7899772-7901198   | 1427 | 5.2 | 5.5 | 4.9 | ↑ | 0.6  | 2.8E-05 | 9.1E-03 |
| chr11:79399019-79399922 | 904  | 5.3 | 4.9 | 5.6 | ↓ | -0.7 | 1.9E-11 | 8.4E-08 |
| chr11:79700849-79701161 | 313  | 2.2 | 1.5 | 2.7 | ↓ | -1.2 | 2.6E-05 | 8.7E-03 |
| chr11:8017630-8018635   | 1006 | 4.5 | 4.7 | 4.3 | ↑ | 0.5  | 1.8E-04 | 3.5E-02 |
| chr11:80632132-80632784 | 653  | 3.7 | 3.4 | 4.0 | ↓ | -0.7 | 2.8E-04 | 4.9E-02 |
| chr11:80673845-80674408 | 564  | 4.7 | 4.4 | 5.0 | ↓ | -0.6 | 5.4E-06 | 2.6E-03 |
| chr11:8111200-8111491   | 292  | 3.0 | 2.5 | 3.4 | ↓ | -1.0 | 8.5E-05 | 2.0E-02 |
| chr11:81358646-81358910 | 265  | 1.7 | 2.2 | 1.0 | ↑ | 1.2  | 7.3E-04 | 9.3E-02 |
| chr11:81411081-81411853 | 773  | 4.5 | 4.2 | 4.7 | ↓ | -0.5 | 6.8E-04 | 8.8E-02 |
| chr11:81500192-81501172 | 981  | 5.1 | 5.3 | 4.8 | ↑ | 0.4  | 2.8E-05 | 9.1E-03 |
| chr11:81504876-81505802 | 927  | 4.7 | 4.5 | 5.0 | ↓ | -0.5 | 4.2E-04 | 6.4E-02 |
| chr11:81507469-81508219 | 751  | 4.2 | 3.9 | 4.5 | ↓ | -0.6 | 4.6E-04 | 6.7E-02 |
| chr11:81508291-81508764 | 474  | 2.6 | 1.8 | 3.1 | ↓ | -1.3 | 6.6E-07 | 5.9E-04 |
| chr11:82008162-82009648 | 1487 | 5.4 | 5.1 | 5.6 | ↓ | -0.5 | 1.4E-04 | 2.8E-02 |
| chr11:82165581-82165934 | 354  | 2.7 | 2.2 | 3.1 | ↓ | -0.9 | 1.2E-04 | 2.6E-02 |
| chr11:82192448-82192955 | 508  | 3.6 | 3.9 | 3.2 | ↑ | 0.7  | 2.1E-04 | 4.0E-02 |
| chr11:82193576-82194221 | 646  | 4.3 | 3.7 | 4.7 | ↓ | -1.0 | 6.9E-11 | 1.8E-07 |
| chr11:82205811-82206717 | 907  | 5.1 | 5.3 | 4.9 | ↑ | 0.4  | 7.8E-04 | 9.6E-02 |
| chr11:82315549-82316096 | 548  | 2.9 | 2.4 | 3.2 | ↓ | -0.8 | 4.2E-04 | 6.3E-02 |
| chr11:82354487-82355092 | 606  | 4.0 | 3.6 | 4.4 | ↓ | -0.8 | 1.0E-05 | 4.2E-03 |
| chr11:82468407-82468703 | 297  | 3.1 | 2.5 | 3.4 | ↓ | -0.9 | 6.4E-05 | 1.7E-02 |
| chr11:82490829-82491546 | 718  | 4.1 | 3.8 | 4.4 | ↓ | -0.6 | 5.0E-04 | 7.0E-02 |
| chr11:829193-830991     | 1799 | 7.5 | 7.3 | 7.6 | ↓ | -0.4 | 3.8E-11 | 1.3E-07 |
| chr11:83000153-83000608 | 456  | 5.1 | 4.4 | 5.6 | ↓ | -1.2 | 1.2E-22 | 3.3E-18 |
| chr11:83095147-83095489 | 343  | 2.4 | 1.9 | 2.8 | ↓ | -0.9 | 7.2E-04 | 9.1E-02 |
| chr11:83595062-83595497 | 436  | 3.2 | 2.8 | 3.5 | ↓ | -0.7 | 4.7E-04 | 6.7E-02 |
| chr11:83731442-83732498 | 1057 | 4.7 | 4.4 | 5.0 | ↓ | -0.6 | 2.1E-06 | 1.4E-03 |

|                         |      |     |     |     |   |      |         |         |
|-------------------------|------|-----|-----|-----|---|------|---------|---------|
| chr11:83822327-83823014 | 688  | 4.8 | 4.4 | 5.1 | ↓ | -0.7 | 1.9E-07 | 2.2E-04 |
| chr11:83824875-83825524 | 650  | 4.6 | 3.9 | 5.0 | ↓ | -1.1 | 5.9E-12 | 3.1E-08 |
| chr11:83836261-83838404 | 2144 | 6.4 | 6.1 | 6.6 | ↓ | -0.5 | 1.5E-12 | 1.8E-08 |
| chr11:83963320-83964658 | 1339 | 5.3 | 5.1 | 5.5 | ↓ | -0.4 | 3.3E-04 | 5.3E-02 |
| chr11:83980135-83980840 | 706  | 4.6 | 4.3 | 4.8 | ↓ | -0.5 | 1.9E-04 | 3.7E-02 |
| chr11:83985669-83986732 | 1064 | 5.6 | 5.4 | 5.7 | ↓ | -0.3 | 1.5E-04 | 3.0E-02 |
| chr11:83986882-83987244 | 363  | 3.2 | 2.7 | 3.6 | ↓ | -1.0 | 6.9E-05 | 1.8E-02 |
| chr11:84078191-84078664 | 474  | 4.8 | 4.5 | 5.0 | ↓ | -0.5 | 2.1E-04 | 4.0E-02 |
| chr11:84089901-84091163 | 1263 | 4.5 | 4.7 | 4.1 | ↑ | 0.6  | 2.6E-05 | 8.7E-03 |
| chr11:84100054-84100361 | 308  | 2.7 | 3.2 | 2.1 | ↑ | 1.0  | 4.0E-05 | 1.2E-02 |
| chr11:84106955-84107522 | 568  | 3.9 | 3.5 | 4.2 | ↓ | -0.7 | 3.0E-04 | 5.0E-02 |
| chr11:84147476-84148248 | 773  | 5.2 | 4.8 | 5.4 | ↓ | -0.6 | 4.4E-08 | 6.2E-05 |
| chr11:84370773-84371754 | 982  | 5.5 | 5.2 | 5.7 | ↓ | -0.5 | 1.0E-04 | 2.3E-02 |
| chr11:84605177-84606203 | 1027 | 5.3 | 5.0 | 5.6 | ↓ | -0.6 | 6.7E-07 | 5.9E-04 |
| chr11:84606347-84608141 | 1795 | 6.6 | 6.5 | 6.7 | ↓ | -0.3 | 7.9E-04 | 9.7E-02 |
| chr11:84869167-84869995 | 829  | 6.0 | 5.8 | 6.1 | ↓ | -0.3 | 8.0E-05 | 2.0E-02 |
| chr11:85028649-85031814 | 3166 | 7.5 | 7.3 | 7.6 | ↓ | -0.3 | 5.5E-08 | 7.3E-05 |
| chr11:85069823-85073335 | 3513 | 7.7 | 7.6 | 7.8 | ↓ | -0.2 | 1.8E-05 | 6.8E-03 |
| chr11:85164114-85168323 | 4210 | 8.1 | 8.0 | 8.2 | ↓ | -0.2 | 1.3E-05 | 5.1E-03 |
| chr11:85302691-85303659 | 969  | 5.9 | 5.6 | 6.1 | ↓ | -0.4 | 4.2E-05 | 1.2E-02 |
| chr11:85956922-85957565 | 644  | 4.5 | 4.1 | 4.9 | ↓ | -0.8 | 2.3E-10 | 5.5E-07 |
| chr11:86029607-86036027 | 6421 | 9.0 | 8.9 | 9.1 | ↓ | -0.1 | 4.7E-04 | 6.7E-02 |
| chr11:86037229-86038274 | 1046 | 5.5 | 5.2 | 5.7 | ↓ | -0.5 | 2.9E-05 | 9.1E-03 |
| chr11:86257853-86263224 | 5372 | 8.7 | 8.6 | 8.8 | ↓ | -0.2 | 1.0E-04 | 2.4E-02 |
| chr11:86432630-86434705 | 2076 | 7.2 | 7.1 | 7.3 | ↓ | -0.2 | 2.1E-05 | 7.4E-03 |
| chr11:86541930-86545080 | 3151 | 7.0 | 7.1 | 6.9 | ↑ | 0.2  | 2.3E-04 | 4.2E-02 |
| chr11:86643596-86644229 | 634  | 4.5 | 4.2 | 4.7 | ↓ | -0.5 | 1.0E-04 | 2.3E-02 |
| chr11:86644960-86645790 | 831  | 4.7 | 5.0 | 4.4 | ↑ | 0.6  | 2.4E-05 | 8.1E-03 |
| chr11:86755504-86755889 | 386  | 2.1 | 2.6 | 1.5 | ↑ | 1.1  | 2.9E-04 | 5.0E-02 |
| chr11:87539518-87540628 | 1111 | 5.9 | 5.8 | 6.1 | ↓ | -0.3 | 4.1E-04 | 6.3E-02 |
| chr11:87624601-87626454 | 1854 | 5.4 | 5.2 | 5.6 | ↓ | -0.3 | 5.7E-04 | 7.7E-02 |
| chr11:880504-880872     | 369  | 3.0 | 2.4 | 3.3 | ↓ | -0.9 | 4.4E-05 | 1.3E-02 |
| chr11:9617092-9617368   | 277  | 2.1 | 1.5 | 2.6 | ↓ | -1.1 | 2.5E-04 | 4.5E-02 |
| chr11:9665632-9666359   | 728  | 4.3 | 3.7 | 4.6 | ↓ | -0.9 | 2.5E-09 | 5.4E-06 |
| chr11:9776771-9777173   | 403  | 2.5 | 1.9 | 2.9 | ↓ | -0.9 | 3.9E-04 | 6.1E-02 |
| chr11:9779595-9780120   | 526  | 4.5 | 4.1 | 4.9 | ↓ | -0.7 | 8.3E-06 | 3.6E-03 |
| chr11:9791302-9791543   | 242  | 1.9 | 1.2 | 2.4 | ↓ | -1.3 | 8.2E-05 | 2.0E-02 |
| chr11:9797319-9797852   | 534  | 3.5 | 2.9 | 3.9 | ↓ | -1.0 | 2.8E-07 | 3.1E-04 |
| chr11:9828482-9829243   | 762  | 4.3 | 4.0 | 4.6 | ↓ | -0.6 | 8.9E-05 | 2.1E-02 |
| chr11:9833596-9833818   | 223  | 2.1 | 1.5 | 2.5 | ↓ | -1.1 | 4.3E-04 | 6.4E-02 |
| chr11:9850116-9850681   | 566  | 2.8 | 2.2 | 3.2 | ↓ | -1.0 | 6.5E-05 | 1.7E-02 |
| chr11:9968758-9969034   | 277  | 2.2 | 1.5 | 2.7 | ↓ | -1.2 | 7.3E-05 | 1.8E-02 |
| chr12:10256649-10256748 | 100  | 1.3 | 1.8 | 0.5 | ↑ | 1.3  | 1.1E-03 | 9.7E-02 |
| chr12:10520790-10520943 | 154  | 1.9 | 1.3 | 2.4 | ↓ | -1.1 | 6.3E-04 | 6.7E-02 |
| chr12:10610930-10611288 | 359  | 3.1 | 2.6 | 3.5 | ↓ | -0.9 | 4.8E-05 | 9.1E-03 |
| chr12:10611337-10611946 | 610  | 4.7 | 4.4 | 4.9 | ↓ | -0.5 | 4.8E-05 | 9.1E-03 |
| chr12:10623898-10624072 | 175  | 2.8 | 2.3 | 3.2 | ↓ | -0.9 | 6.6E-04 | 6.9E-02 |

|                         |      |     |     |     |   |      |         |         |
|-------------------------|------|-----|-----|-----|---|------|---------|---------|
| chr12:11005874-11006252 | 379  | 2.9 | 3.3 | 2.5 | ↑ | 0.8  | 9.1E-04 | 8.7E-02 |
| chr12:11038048-11038627 | 580  | 3.7 | 3.3 | 3.9 | ↓ | -0.6 | 1.1E-03 | 9.8E-02 |
| chr12:11320323-11320459 | 137  | 1.6 | 0.9 | 2.1 | ↓ | -1.3 | 5.1E-04 | 5.8E-02 |
| chr12:12031907-12032248 | 342  | 2.5 | 2.9 | 1.9 | ↑ | 0.9  | 7.4E-04 | 7.5E-02 |
| chr12:12112418-12112658 | 241  | 2.9 | 2.4 | 3.3 | ↓ | -0.8 | 6.2E-04 | 6.6E-02 |
| chr12:12164191-12164496 | 306  | 3.1 | 2.7 | 3.5 | ↓ | -0.8 | 6.3E-04 | 6.7E-02 |
| chr12:1225403-1226074   | 672  | 5.9 | 5.7 | 6.1 | ↓ | -0.4 | 3.9E-06 | 1.2E-03 |
| chr12:1227700-1228324   | 625  | 4.8 | 4.5 | 5.1 | ↓ | -0.6 | 1.4E-04 | 2.1E-02 |
| chr12:12309230-12309481 | 252  | 2.4 | 1.8 | 2.8 | ↓ | -1.0 | 1.3E-04 | 2.0E-02 |
| chr12:12309626-12310287 | 662  | 5.3 | 5.1 | 5.5 | ↓ | -0.3 | 5.2E-04 | 5.8E-02 |
| chr12:1232202-1232632   | 431  | 3.7 | 3.2 | 4.1 | ↓ | -0.8 | 9.6E-05 | 1.6E-02 |
| chr12:1232873-1233436   | 564  | 4.2 | 3.6 | 4.6 | ↓ | -1.0 | 2.4E-09 | 2.0E-06 |
| chr12:12343314-12343528 | 215  | 1.9 | 2.4 | 1.1 | ↑ | 1.3  | 3.8E-05 | 7.7E-03 |
| chr12:12357901-12358502 | 602  | 5.8 | 5.5 | 6.0 | ↓ | -0.5 | 8.6E-06 | 2.2E-03 |
| chr12:12670811-12670982 | 172  | 2.0 | 2.4 | 1.4 | ↑ | 1.0  | 7.1E-04 | 7.3E-02 |
| chr12:12680187-12680392 | 206  | 2.4 | 2.9 | 1.7 | ↑ | 1.2  | 4.5E-06 | 1.4E-03 |
| chr12:1276901-1277750   | 850  | 5.6 | 5.4 | 5.8 | ↓ | -0.3 | 1.1E-03 | 9.8E-02 |
| chr12:12781404-12781734 | 331  | 2.6 | 3.0 | 2.0 | ↑ | 1.0  | 2.7E-04 | 3.5E-02 |
| chr12:1290705-1291074   | 370  | 2.6 | 1.8 | 3.1 | ↓ | -1.3 | 2.1E-06 | 7.3E-04 |
| chr12:13139543-13139823 | 281  | 3.1 | 3.4 | 2.7 | ↑ | 0.8  | 3.1E-04 | 4.0E-02 |
| chr12:13264590-13264845 | 256  | 4.0 | 4.3 | 3.6 | ↑ | 0.6  | 5.5E-05 | 1.0E-02 |
| chr12:13387474-13387929 | 456  | 4.4 | 4.0 | 4.7 | ↓ | -0.7 | 4.4E-05 | 8.6E-03 |
| chr12:13401114-13401258 | 145  | 1.5 | 0.7 | 2.0 | ↓ | -1.3 | 5.7E-04 | 6.3E-02 |
| chr12:13457149-13457356 | 208  | 2.1 | 2.5 | 1.5 | ↑ | 1.1  | 3.8E-04 | 4.6E-02 |
| chr12:13578081-13578427 | 347  | 3.1 | 3.5 | 2.6 | ↑ | 0.8  | 1.0E-04 | 1.7E-02 |
| chr12:1456218-1457583   | 1366 | 6.0 | 6.2 | 5.9 | ↑ | 0.3  | 1.1E-03 | 1.0E-01 |
| chr12:1486054-1489495   | 3442 | 7.9 | 7.8 | 8.0 | ↓ | -0.2 | 8.8E-05 | 1.5E-02 |
| chr12:14903302-14903505 | 204  | 2.6 | 3.0 | 2.2 | ↑ | 0.8  | 9.5E-04 | 9.0E-02 |
| chr12:14910436-14910546 | 111  | 1.7 | 2.2 | 0.9 | ↑ | 1.3  | 1.6E-04 | 2.3E-02 |
| chr12:14950352-14951923 | 1572 | 6.5 | 6.3 | 6.7 | ↓ | -0.4 | 1.0E-03 | 9.6E-02 |
| chr12:14983011-14983718 | 708  | 4.6 | 4.2 | 4.9 | ↓ | -0.7 | 7.5E-06 | 2.0E-03 |
| chr12:15041820-15042028 | 209  | 2.2 | 2.6 | 1.6 | ↑ | 1.0  | 4.3E-04 | 5.1E-02 |
| chr12:15044518-15045400 | 883  | 4.3 | 4.6 | 3.9 | ↑ | 0.7  | 2.0E-06 | 7.1E-04 |
| chr12:1506850-1509065   | 2216 | 7.3 | 7.1 | 7.4 | ↓ | -0.3 | 2.5E-06 | 8.7E-04 |
| chr12:1511358-1511824   | 467  | 4.3 | 4.0 | 4.6 | ↓ | -0.6 | 1.3E-04 | 2.0E-02 |
| chr12:1562192-1562782   | 591  | 4.6 | 4.2 | 4.9 | ↓ | -0.7 | 1.0E-05 | 2.5E-03 |
| chr12:15923103-15923982 | 880  | 4.9 | 4.6 | 5.1 | ↓ | -0.5 | 7.4E-05 | 1.3E-02 |
| chr12:15979165-15979348 | 184  | 2.7 | 2.2 | 3.1 | ↓ | -0.9 | 3.3E-04 | 4.1E-02 |
| chr12:16760514-16760652 | 139  | 1.8 | 2.4 | 1.0 | ↑ | 1.4  | 4.3E-05 | 8.5E-03 |
| chr12:1694803-1695147   | 345  | 3.1 | 3.6 | 2.5 | ↑ | 1.0  | 5.9E-06 | 1.7E-03 |
| chr12:1699644-1703092   | 3449 | 8.3 | 8.4 | 8.2 | ↑ | 0.2  | 2.5E-07 | 1.3E-04 |
| chr12:1705682-1706274   | 593  | 3.9 | 3.4 | 4.4 | ↓ | -1.0 | 1.1E-06 | 4.3E-04 |
| chr12:1708359-1710304   | 1946 | 7.7 | 7.8 | 7.6 | ↑ | 0.2  | 6.0E-04 | 6.5E-02 |
| chr12:17152414-17152846 | 433  | 4.0 | 3.7 | 4.3 | ↓ | -0.6 | 1.1E-04 | 1.7E-02 |
| chr12:17220697-17221086 | 390  | 2.3 | 1.3 | 2.8 | ↓ | -1.5 | 2.2E-07 | 1.2E-04 |
| chr12:180040-180548     | 509  | 3.6 | 3.9 | 3.3 | ↑ | 0.6  | 6.8E-04 | 7.0E-02 |
| chr12:18358605-18359025 | 421  | 3.6 | 3.0 | 4.0 | ↓ | -1.0 | 8.4E-06 | 2.1E-03 |

|                         |      |     |     |     |   |      |         |         |
|-------------------------|------|-----|-----|-----|---|------|---------|---------|
| chr12:18600032-18600784 | 753  | 5.1 | 5.3 | 5.0 | ↑ | 0.3  | 9.3E-04 | 8.8E-02 |
| chr12:18691220-18691550 | 331  | 3.4 | 3.0 | 3.7 | ↓ | -0.7 | 7.7E-04 | 7.6E-02 |
| chr12:18741994-18742401 | 408  | 5.7 | 5.4 | 6.0 | ↓ | -0.6 | 5.5E-07 | 2.7E-04 |
| chr12:18802932-18803107 | 176  | 2.1 | 2.5 | 1.4 | ↑ | 1.1  | 2.7E-04 | 3.5E-02 |
| chr12:18954521-18954906 | 386  | 3.9 | 3.5 | 4.1 | ↓ | -0.6 | 7.1E-04 | 7.2E-02 |
| chr12:1895950-1896966   | 1017 | 5.2 | 5.0 | 5.4 | ↓ | -0.4 | 1.4E-04 | 2.1E-02 |
| chr12:19012577-19013176 | 600  | 3.9 | 3.5 | 4.2 | ↓ | -0.7 | 3.7E-05 | 7.6E-03 |
| chr12:19217341-19217545 | 205  | 1.9 | 1.0 | 2.4 | ↓ | -1.5 | 1.9E-05 | 4.4E-03 |
| chr12:19244898-19245350 | 453  | 3.7 | 3.4 | 4.0 | ↓ | -0.6 | 7.5E-04 | 7.5E-02 |
| chr12:19270923-19271167 | 245  | 2.7 | 3.1 | 2.1 | ↑ | 1.0  | 8.1E-04 | 7.9E-02 |
| chr12:19271616-19272072 | 457  | 4.2 | 4.5 | 3.8 | ↑ | 0.8  | 6.1E-06 | 1.7E-03 |
| chr12:19405275-19405479 | 205  | 2.5 | 2.0 | 2.9 | ↓ | -0.9 | 8.0E-04 | 7.8E-02 |
| chr12:19427976-19428388 | 413  | 3.9 | 3.2 | 4.3 | ↓ | -1.1 | 7.7E-12 | 1.1E-08 |
| chr12:19907170-19907618 | 449  | 4.5 | 4.1 | 4.7 | ↓ | -0.6 | 1.3E-04 | 2.0E-02 |
| chr12:20311469-20311803 | 335  | 4.6 | 4.9 | 4.2 | ↑ | 0.7  | 1.1E-07 | 6.8E-05 |
| chr12:20380255-20380724 | 470  | 3.7 | 3.2 | 4.1 | ↓ | -1.0 | 1.1E-07 | 7.0E-05 |
| chr12:20403189-20403391 | 203  | 3.0 | 2.6 | 3.4 | ↓ | -0.9 | 2.7E-04 | 3.5E-02 |
| chr12:20847729-20848004 | 276  | 3.3 | 3.6 | 3.0 | ↑ | 0.7  | 7.6E-04 | 7.6E-02 |
| chr12:21025956-21026202 | 247  | 3.2 | 3.6 | 2.6 | ↑ | 1.0  | 1.1E-06 | 4.3E-04 |
| chr12:21042349-21042544 | 196  | 2.5 | 2.9 | 1.8 | ↑ | 1.1  | 5.0E-05 | 9.4E-03 |
| chr12:21159421-21160152 | 732  | 6.0 | 6.1 | 5.9 | ↑ | 0.2  | 6.7E-04 | 7.0E-02 |
| chr12:21431907-21432199 | 293  | 3.7 | 3.4 | 4.0 | ↓ | -0.6 | 2.5E-04 | 3.4E-02 |
| chr12:21729234-21729578 | 345  | 4.7 | 4.5 | 4.9 | ↓ | -0.5 | 1.9E-04 | 2.7E-02 |
| chr12:21737041-21737788 | 748  | 5.4 | 5.6 | 5.2 | ↑ | 0.4  | 7.0E-04 | 7.2E-02 |
| chr12:22161953-22162449 | 497  | 4.7 | 4.5 | 4.9 | ↓ | -0.4 | 3.2E-04 | 4.0E-02 |
| chr12:22257127-22257466 | 340  | 3.0 | 2.5 | 3.4 | ↓ | -0.9 | 3.3E-05 | 6.9E-03 |
| chr12:22307585-22307808 | 224  | 2.0 | 2.4 | 1.4 | ↑ | 1.0  | 1.1E-03 | 9.9E-02 |
| chr12:2241591-2241934   | 344  | 3.7 | 4.1 | 3.1 | ↑ | 1.0  | 1.4E-07 | 8.1E-05 |
| chr12:22478765-22479235 | 471  | 3.8 | 3.4 | 4.1 | ↓ | -0.7 | 9.2E-05 | 1.6E-02 |
| chr12:227058-230433     | 3376 | 7.9 | 8.0 | 7.8 | ↑ | 0.1  | 1.1E-03 | 9.7E-02 |
| chr12:23119648-23120050 | 403  | 3.2 | 2.6 | 3.6 | ↓ | -1.0 | 1.9E-05 | 4.3E-03 |
| chr12:23499936-23500246 | 311  | 3.8 | 3.4 | 4.2 | ↓ | -0.8 | 7.8E-06 | 2.0E-03 |
| chr12:23527340-23527523 | 184  | 1.7 | 0.5 | 2.3 | ↓ | -1.8 | 1.2E-06 | 4.8E-04 |
| chr12:23532948-23533559 | 612  | 4.7 | 4.3 | 5.0 | ↓ | -0.7 | 9.7E-07 | 4.2E-04 |
| chr12:23533670-23533881 | 212  | 2.7 | 1.9 | 3.2 | ↓ | -1.2 | 3.5E-06 | 1.2E-03 |
| chr12:23543427-23543637 | 211  | 3.0 | 2.2 | 3.5 | ↓ | -1.3 | 1.5E-08 | 1.1E-05 |
| chr12:23571770-23572024 | 255  | 2.2 | 1.3 | 2.7 | ↓ | -1.4 | 3.1E-06 | 1.0E-03 |
| chr12:23660797-23660952 | 156  | 2.5 | 1.8 | 3.0 | ↓ | -1.2 | 4.1E-06 | 1.3E-03 |
| chr12:24000379-24000574 | 196  | 2.1 | 1.4 | 2.6 | ↓ | -1.2 | 1.0E-04 | 1.6E-02 |
| chr12:24027352-24027652 | 301  | 4.1 | 4.4 | 3.8 | ↑ | 0.5  | 6.2E-04 | 6.6E-02 |
| chr12:24036603-24036816 | 214  | 2.2 | 2.6 | 1.6 | ↑ | 1.0  | 7.7E-04 | 7.6E-02 |
| chr12:2406256-2408002   | 1747 | 7.0 | 6.9 | 7.1 | ↓ | -0.2 | 3.4E-04 | 4.3E-02 |
| chr12:24110029-24110243 | 215  | 3.8 | 3.5 | 4.1 | ↓ | -0.6 | 1.0E-04 | 1.7E-02 |
| chr12:24182148-24182302 | 155  | 2.2 | 1.5 | 2.6 | ↓ | -1.1 | 2.1E-04 | 2.9E-02 |
| chr12:24231851-24232106 | 256  | 2.8 | 2.3 | 3.1 | ↓ | -0.9 | 4.7E-04 | 5.4E-02 |
| chr12:24366863-24367062 | 200  | 3.0 | 2.5 | 3.3 | ↓ | -0.8 | 3.4E-04 | 4.2E-02 |
| chr12:24368711-24368884 | 174  | 1.8 | 0.9 | 2.4 | ↓ | -1.5 | 2.7E-05 | 5.8E-03 |

|                         |      |     |     |     |   |      |         |         |
|-------------------------|------|-----|-----|-----|---|------|---------|---------|
| chr12:24370356-24370551 | 196  | 3.0 | 2.4 | 3.5 | ↓ | -1.1 | 5.8E-06 | 1.7E-03 |
| chr12:24470836-24471130 | 295  | 2.5 | 1.9 | 3.0 | ↓ | -1.0 | 9.4E-05 | 1.6E-02 |
| chr12:24493273-24493450 | 178  | 2.4 | 0.5 | 3.2 | ↓ | -2.7 | 7.0E-18 | 2.2E-14 |
| chr12:24607662-24607980 | 319  | 2.4 | 1.6 | 3.0 | ↓ | -1.3 | 1.6E-06 | 6.3E-04 |
| chr12:24635588-24636164 | 577  | 5.0 | 4.6 | 5.3 | ↓ | -0.7 | 8.1E-08 | 5.3E-05 |
| chr12:24637268-24637698 | 431  | 3.9 | 3.0 | 4.5 | ↓ | -1.5 | 4.7E-18 | 1.6E-14 |
| chr12:24695358-24695666 | 309  | 2.4 | 1.5 | 3.0 | ↓ | -1.5 | 1.4E-07 | 8.0E-05 |
| chr12:24724276-24724522 | 247  | 2.5 | 1.5 | 3.0 | ↓ | -1.6 | 3.4E-08 | 2.4E-05 |
| chr12:24734273-24734678 | 406  | 3.4 | 2.8 | 3.8 | ↓ | -1.0 | 1.7E-06 | 6.4E-04 |
| chr12:24742161-24742670 | 510  | 4.8 | 4.5 | 5.1 | ↓ | -0.6 | 3.9E-04 | 4.7E-02 |
| chr12:24743463-24744094 | 632  | 5.0 | 4.5 | 5.4 | ↓ | -0.9 | 1.6E-11 | 2.1E-08 |
| chr12:24744283-24745147 | 865  | 5.0 | 4.4 | 5.4 | ↓ | -1.0 | 8.0E-15 | 1.8E-11 |
| chr12:24745462-24746030 | 569  | 4.7 | 4.3 | 5.0 | ↓ | -0.8 | 1.8E-10 | 1.8E-07 |
| chr12:24768346-24768832 | 487  | 3.8 | 4.2 | 3.3 | ↑ | 0.9  | 5.5E-07 | 2.7E-04 |
| chr12:24775294-24776610 | 1317 | 6.7 | 6.0 | 7.2 | ↓ | -1.2 | 4.6E-17 | 1.3E-13 |
| chr12:24776729-24777032 | 304  | 2.8 | 3.3 | 2.2 | ↑ | 1.1  | 6.7E-06 | 1.8E-03 |
| chr12:24777047-24777492 | 446  | 4.5 | 4.9 | 4.0 | ↑ | 0.8  | 8.7E-10 | 7.9E-07 |
| chr12:24779893-24780524 | 632  | 4.6 | 5.1 | 3.7 | ↑ | 1.4  | 1.6E-24 | 6.5E-21 |
| chr12:24782307-24783111 | 805  | 5.4 | 5.7 | 5.0 | ↑ | 0.8  | 1.7E-06 | 6.4E-04 |
| chr12:24787325-24787818 | 494  | 4.0 | 4.4 | 3.4 | ↑ | 1.1  | 2.4E-07 | 1.3E-04 |
| chr12:24791361-24791535 | 175  | 2.1 | 2.5 | 1.4 | ↑ | 1.0  | 6.5E-04 | 6.9E-02 |
| chr12:24823589-24823883 | 295  | 2.5 | 1.6 | 3.0 | ↓ | -1.4 | 7.3E-07 | 3.3E-04 |
| chr12:24827590-24827951 | 362  | 3.3 | 2.2 | 3.9 | ↓ | -1.7 | 5.8E-15 | 1.3E-11 |
| chr12:24831209-24831655 | 447  | 3.2 | 2.2 | 3.7 | ↓ | -1.5 | 5.0E-11 | 5.9E-08 |
| chr12:24834468-24834767 | 300  | 2.7 | 1.7 | 3.3 | ↓ | -1.7 | 7.7E-11 | 8.7E-08 |
| chr12:24835086-24835290 | 205  | 2.3 | 0.8 | 3.0 | ↓ | -2.2 | 2.7E-12 | 4.1E-09 |
| chr12:24835745-24836051 | 307  | 2.7 | 1.6 | 3.3 | ↓ | -1.7 | 1.3E-10 | 1.4E-07 |
| chr12:24838227-24838388 | 162  | 2.1 | 1.5 | 2.6 | ↓ | -1.1 | 2.0E-04 | 2.9E-02 |
| chr12:24838675-24838918 | 244  | 2.9 | 2.2 | 3.3 | ↓ | -1.1 | 5.3E-06 | 1.6E-03 |
| chr12:24840865-24841303 | 439  | 3.6 | 2.4 | 4.2 | ↓ | -1.8 | 4.7E-17 | 1.3E-13 |
| chr12:24841392-24842007 | 616  | 5.1 | 3.8 | 5.7 | ↓ | -1.9 | 2.0E-29 | 1.5E-25 |
| chr12:24842159-24842534 | 376  | 2.7 | 1.6 | 3.3 | ↓ | -1.7 | 3.2E-11 | 4.0E-08 |
| chr12:24846060-24846435 | 376  | 3.8 | 2.1 | 4.6 | ↓ | -2.5 | 3.3E-34 | 4.1E-30 |
| chr12:24847341-24848292 | 952  | 4.5 | 3.0 | 5.2 | ↓ | -2.1 | 5.0E-33 | 4.6E-29 |
| chr12:24848350-24848589 | 240  | 2.6 | 1.3 | 3.3 | ↓ | -2.1 | 2.6E-14 | 5.5E-11 |
| chr12:24848753-24849845 | 1093 | 5.6 | 3.8 | 6.4 | ↓ | -2.5 | 3.8E-49 | 1.4E-44 |
| chr12:24850919-24852307 | 1389 | 6.0 | 4.1 | 6.7 | ↓ | -2.6 | 8.6E-45 | 1.6E-40 |
| chr12:24853395-24853694 | 300  | 3.2 | 1.6 | 3.9 | ↓ | -2.3 | 5.9E-21 | 2.2E-17 |
| chr12:24853803-24854149 | 347  | 4.3 | 2.7 | 5.1 | ↓ | -2.4 | 3.5E-28 | 2.2E-24 |
| chr12:24861067-24861467 | 401  | 3.5 | 2.9 | 3.9 | ↓ | -1.0 | 6.0E-07 | 2.8E-04 |
| chr12:24872400-24872756 | 357  | 3.5 | 2.3 | 4.1 | ↓ | -1.8 | 1.6E-13 | 3.0E-10 |
| chr12:24876927-24877137 | 211  | 2.6 | 3.2 | 1.8 | ↑ | 1.4  | 8.1E-06 | 2.1E-03 |
| chr12:24877374-24878051 | 678  | 4.0 | 4.5 | 3.5 | ↑ | 1.0  | 1.2E-09 | 1.0E-06 |
| chr12:24878724-24879563 | 840  | 5.1 | 5.8 | 3.9 | ↑ | 1.9  | 5.3E-28 | 2.8E-24 |
| chr12:24881806-24882028 | 223  | 2.4 | 2.9 | 1.6 | ↑ | 1.3  | 7.8E-06 | 2.0E-03 |
| chr12:24882054-24882306 | 253  | 2.9 | 3.4 | 2.2 | ↑ | 1.1  | 1.1E-06 | 4.5E-04 |
| chr12:24882545-24882941 | 397  | 4.0 | 4.7 | 2.4 | ↑ | 2.3  | 7.0E-28 | 3.2E-24 |

|                         |      |     |     |     |   |      |         |         |
|-------------------------|------|-----|-----|-----|---|------|---------|---------|
| chr12:24886562-24886723 | 162  | 1.9 | 2.4 | 1.0 | ↑ | 1.4  | 4.1E-05 | 8.2E-03 |
| chr12:24997022-24997295 | 274  | 3.4 | 3.0 | 3.7 | ↓ | -0.8 | 1.2E-04 | 1.9E-02 |
| chr12:25130500-25130744 | 245  | 4.0 | 3.6 | 4.2 | ↓ | -0.6 | 3.6E-04 | 4.4E-02 |
| chr12:25177409-25178111 | 703  | 5.1 | 4.8 | 5.4 | ↓ | -0.6 | 2.5E-04 | 3.3E-02 |
| chr12:25353363-25353637 | 275  | 3.6 | 3.2 | 4.0 | ↓ | -0.8 | 3.0E-05 | 6.4E-03 |
| chr12:25363318-25363664 | 347  | 3.7 | 3.3 | 4.0 | ↓ | -0.7 | 6.4E-04 | 6.8E-02 |
| chr12:25440302-25440546 | 245  | 3.1 | 2.7 | 3.4 | ↓ | -0.7 | 1.1E-03 | 1.0E-01 |
| chr12:25535884-25536422 | 539  | 3.8 | 4.1 | 3.4 | ↑ | 0.8  | 9.2E-06 | 2.3E-03 |
| chr12:25689314-25689705 | 392  | 2.4 | 1.9 | 2.8 | ↓ | -0.9 | 1.1E-03 | 9.9E-02 |
| chr12:25701151-25701522 | 372  | 4.6 | 4.3 | 4.8 | ↓ | -0.5 | 9.5E-05 | 1.6E-02 |
| chr12:26022391-26022635 | 245  | 3.1 | 2.6 | 3.4 | ↓ | -0.8 | 1.5E-04 | 2.2E-02 |
| chr12:26165379-26166168 | 790  | 5.1 | 4.9 | 5.3 | ↓ | -0.4 | 9.2E-04 | 8.7E-02 |
| chr12:26418901-26419267 | 367  | 3.3 | 2.8 | 3.6 | ↓ | -0.8 | 2.0E-04 | 2.8E-02 |
| chr12:26490179-26490526 | 348  | 3.6 | 3.2 | 4.0 | ↓ | -0.7 | 4.1E-04 | 4.9E-02 |
| chr12:26492380-26492890 | 511  | 4.9 | 4.6 | 5.1 | ↓ | -0.5 | 1.7E-05 | 4.0E-03 |
| chr12:26503062-26503386 | 325  | 4.3 | 4.6 | 3.9 | ↑ | 0.6  | 4.8E-05 | 9.1E-03 |
| chr12:26531230-26531650 | 421  | 3.7 | 4.0 | 3.3 | ↑ | 0.7  | 2.6E-05 | 5.7E-03 |
| chr12:26927204-26927371 | 168  | 2.6 | 2.1 | 3.0 | ↓ | -1.0 | 1.2E-04 | 1.9E-02 |
| chr12:26994695-26995001 | 307  | 3.3 | 2.7 | 3.7 | ↓ | -1.1 | 1.2E-06 | 4.8E-04 |
| chr12:26999335-26999563 | 229  | 3.1 | 3.5 | 2.6 | ↑ | 0.8  | 1.3E-04 | 2.0E-02 |
| chr12:27281446-27282299 | 854  | 6.0 | 5.6 | 6.3 | ↓ | -0.6 | 3.5E-07 | 1.8E-04 |
| chr12:27430479-27430692 | 214  | 1.8 | 0.8 | 2.4 | ↓ | -1.6 | 3.6E-06 | 1.2E-03 |
| chr12:27599229-27599368 | 140  | 2.1 | 2.6 | 1.3 | ↑ | 1.3  | 4.2E-05 | 8.2E-03 |
| chr12:27674543-27674817 | 275  | 2.6 | 3.0 | 2.2 | ↑ | 0.9  | 4.6E-04 | 5.3E-02 |
| chr12:27981347-27981565 | 219  | 2.6 | 2.0 | 3.0 | ↓ | -1.0 | 6.4E-05 | 1.2E-02 |
| chr12:27981696-27981835 | 140  | 2.0 | 1.3 | 2.4 | ↓ | -1.2 | 3.5E-04 | 4.4E-02 |
| chr12:2978027-2978741   | 715  | 6.5 | 6.3 | 6.7 | ↓ | -0.4 | 1.2E-04 | 1.9E-02 |
| chr12:3012270-3013896   | 1627 | 7.0 | 6.9 | 7.1 | ↓ | -0.2 | 4.7E-05 | 9.0E-03 |
| chr12:3090219-3090677   | 459  | 4.5 | 4.1 | 4.7 | ↓ | -0.6 | 1.2E-04 | 1.8E-02 |
| chr12:3111315-3112446   | 1132 | 6.3 | 6.1 | 6.4 | ↓ | -0.3 | 2.7E-05 | 5.8E-03 |
| chr12:3142272-3143578   | 1307 | 5.9 | 5.7 | 6.0 | ↓ | -0.3 | 2.2E-04 | 3.0E-02 |
| chr12:31583718-31583939 | 222  | 3.1 | 2.5 | 3.6 | ↓ | -1.0 | 9.4E-05 | 1.6E-02 |
| chr12:32253320-32253472 | 153  | 1.9 | 2.4 | 1.2 | ↑ | 1.1  | 6.0E-04 | 6.5E-02 |
| chr12:32263553-32263820 | 268  | 2.1 | 1.3 | 2.6 | ↓ | -1.3 | 1.3E-05 | 3.1E-03 |
| chr12:32343514-32343701 | 188  | 2.4 | 2.8 | 1.8 | ↑ | 1.0  | 1.8E-04 | 2.6E-02 |
| chr12:329771-329932     | 162  | 1.8 | 2.3 | 1.1 | ↑ | 1.2  | 6.0E-04 | 6.5E-02 |
| chr12:3303826-3304491   | 666  | 4.5 | 4.2 | 4.8 | ↓ | -0.6 | 9.0E-05 | 1.5E-02 |
| chr12:33193618-33193899 | 282  | 3.7 | 2.8 | 4.2 | ↓ | -1.4 | 1.8E-13 | 3.3E-10 |
| chr12:3347815-3348034   | 220  | 2.1 | 2.6 | 1.4 | ↑ | 1.1  | 1.8E-04 | 2.6E-02 |
| chr12:33572460-33572712 | 253  | 3.4 | 2.9 | 3.7 | ↓ | -0.8 | 1.1E-04 | 1.7E-02 |
| chr12:34228223-34228343 | 121  | 1.3 | 1.9 | 0.5 | ↑ | 1.3  | 5.5E-04 | 6.1E-02 |
| chr12:34256594-34256818 | 225  | 2.8 | 2.3 | 3.2 | ↓ | -0.9 | 3.0E-04 | 3.9E-02 |
| chr12:34523573-34523826 | 254  | 2.2 | 1.6 | 2.6 | ↓ | -1.0 | 5.2E-04 | 5.8E-02 |
| chr12:34584452-34584825 | 374  | 4.1 | 3.5 | 4.5 | ↓ | -1.0 | 2.4E-10 | 2.4E-07 |
| chr12:34777188-34777674 | 487  | 3.8 | 3.2 | 4.2 | ↓ | -1.0 | 6.1E-07 | 2.8E-04 |
| chr12:35029153-35029300 | 148  | 2.2 | 1.7 | 2.6 | ↓ | -0.9 | 1.1E-03 | 1.0E-01 |
| chr12:3540132-3540783   | 652  | 5.6 | 5.2 | 5.9 | ↓ | -0.6 | 3.4E-13 | 5.8E-10 |

|                         |      |     |     |     |   |      |         |         |
|-------------------------|------|-----|-----|-----|---|------|---------|---------|
| chr12:3575442-3576053   | 612  | 4.5 | 3.9 | 4.9 | ↓ | -1.0 | 2.2E-07 | 1.2E-04 |
| chr12:3595965-3596357   | 393  | 5.2 | 4.9 | 5.4 | ↓ | -0.5 | 1.6E-04 | 2.3E-02 |
| chr12:36721480-36721715 | 236  | 3.3 | 2.8 | 3.6 | ↓ | -0.8 | 1.3E-04 | 2.0E-02 |
| chr12:3677349-3678019   | 671  | 4.6 | 4.8 | 4.2 | ↑ | 0.6  | 2.6E-05 | 5.7E-03 |
| chr12:37965685-37965808 | 124  | 1.5 | 0.4 | 2.1 | ↓ | -1.8 | 5.8E-06 | 1.7E-03 |
| chr12:38249716-38249990 | 275  | 4.1 | 3.7 | 4.4 | ↓ | -0.6 | 3.8E-05 | 7.7E-03 |
| chr12:38251650-38252734 | 1085 | 5.1 | 4.7 | 5.4 | ↓ | -0.6 | 2.2E-08 | 1.6E-05 |
| chr12:38259578-38260341 | 764  | 5.0 | 4.5 | 5.3 | ↓ | -0.8 | 1.5E-08 | 1.1E-05 |
| chr12:38332593-38332976 | 384  | 3.0 | 3.5 | 2.4 | ↑ | 1.1  | 7.5E-06 | 2.0E-03 |
| chr12:38333280-38333509 | 230  | 2.8 | 3.2 | 2.2 | ↑ | 1.0  | 1.4E-04 | 2.1E-02 |
| chr12:3843454-3843763   | 310  | 4.3 | 4.0 | 4.6 | ↓ | -0.5 | 3.2E-04 | 4.1E-02 |
| chr12:38516537-38516867 | 331  | 4.4 | 3.9 | 4.8 | ↓ | -1.0 | 4.8E-11 | 5.7E-08 |
| chr12:3856041-3856881   | 841  | 5.6 | 5.2 | 5.8 | ↓ | -0.6 | 8.3E-11 | 8.8E-08 |
| chr12:3884307-3885269   | 963  | 5.4 | 5.6 | 5.2 | ↑ | 0.4  | 2.6E-05 | 5.7E-03 |
| chr12:39161162-39161363 | 202  | 2.3 | 2.7 | 1.8 | ↑ | 1.0  | 5.3E-04 | 6.0E-02 |
| chr12:3938364-3940690   | 2327 | 7.3 | 7.4 | 7.1 | ↑ | 0.2  | 5.2E-06 | 1.5E-03 |
| chr12:3995395-3996151   | 757  | 4.9 | 4.7 | 5.1 | ↓ | -0.4 | 6.7E-04 | 7.0E-02 |
| chr12:39983675-39983933 | 259  | 3.4 | 2.9 | 3.7 | ↓ | -0.8 | 1.7E-05 | 4.1E-03 |
| chr12:40213391-40213554 | 164  | 1.9 | 2.4 | 0.9 | ↑ | 1.6  | 8.4E-06 | 2.1E-03 |
| chr12:4032515-4033047   | 533  | 3.4 | 3.7 | 3.0 | ↑ | 0.7  | 1.4E-04 | 2.1E-02 |
| chr12:40629033-40629177 | 145  | 2.2 | 1.4 | 2.8 | ↓ | -1.3 | 4.2E-06 | 1.3E-03 |
| chr12:40796901-40797139 | 239  | 2.7 | 2.1 | 3.2 | ↓ | -1.1 | 7.7E-06 | 2.0E-03 |
| chr12:4087316-4087575   | 260  | 3.9 | 3.5 | 4.2 | ↓ | -0.7 | 2.8E-05 | 5.9E-03 |
| chr12:41278388-41278593 | 206  | 1.9 | 2.4 | 1.2 | ↑ | 1.2  | 1.6E-04 | 2.4E-02 |
| chr12:4134737-4135251   | 515  | 3.6 | 3.9 | 3.2 | ↑ | 0.7  | 7.7E-05 | 1.3E-02 |
| chr12:41541773-41542639 | 867  | 5.4 | 5.1 | 5.6 | ↓ | -0.5 | 6.4E-07 | 2.9E-04 |
| chr12:41697042-41699144 | 2103 | 7.6 | 7.5 | 7.7 | ↓ | -0.2 | 2.5E-05 | 5.7E-03 |
| chr12:41774112-41774397 | 286  | 2.4 | 1.9 | 2.8 | ↓ | -0.9 | 6.5E-04 | 6.9E-02 |
| chr12:41895699-41896290 | 592  | 4.5 | 4.2 | 4.7 | ↓ | -0.4 | 8.7E-04 | 8.4E-02 |
| chr12:42410206-42410671 | 466  | 3.8 | 3.4 | 4.0 | ↓ | -0.6 | 7.7E-04 | 7.6E-02 |
| chr12:42466689-42467011 | 323  | 3.6 | 3.0 | 4.0 | ↓ | -1.0 | 1.3E-07 | 8.0E-05 |
| chr12:42530489-42530777 | 289  | 3.2 | 2.7 | 3.6 | ↓ | -1.0 | 5.9E-06 | 1.7E-03 |
| chr12:42549939-42550336 | 398  | 4.2 | 4.4 | 3.8 | ↑ | 0.6  | 5.2E-05 | 9.6E-03 |
| chr12:42573627-42573900 | 274  | 3.9 | 3.6 | 4.2 | ↓ | -0.7 | 7.4E-05 | 1.3E-02 |
| chr12:42630136-42630462 | 327  | 3.8 | 3.5 | 4.1 | ↓ | -0.6 | 4.8E-04 | 5.5E-02 |
| chr12:42673197-42673537 | 341  | 2.9 | 2.3 | 3.3 | ↓ | -1.0 | 7.5E-05 | 1.3E-02 |
| chr12:4286279-4286499   | 221  | 2.5 | 2.0 | 3.0 | ↓ | -1.0 | 3.5E-04 | 4.3E-02 |
| chr12:42876658-42876905 | 248  | 2.5 | 2.9 | 1.9 | ↑ | 1.0  | 9.3E-05 | 1.6E-02 |
| chr12:42990158-42990319 | 162  | 1.9 | 1.2 | 2.4 | ↓ | -1.2 | 1.0E-03 | 9.6E-02 |
| chr12:4301138-4301424   | 287  | 3.7 | 3.3 | 4.0 | ↓ | -0.7 | 1.5E-04 | 2.3E-02 |
| chr12:43187495-43187802 | 308  | 5.1 | 4.8 | 5.3 | ↓ | -0.5 | 2.1E-06 | 7.3E-04 |
| chr12:43284609-43285165 | 557  | 4.5 | 4.2 | 4.7 | ↓ | -0.6 | 6.7E-04 | 7.0E-02 |
| chr12:43348716-43349404 | 689  | 4.3 | 3.9 | 4.6 | ↓ | -0.7 | 7.1E-06 | 1.9E-03 |
| chr12:43722167-43722740 | 574  | 5.3 | 5.1 | 5.5 | ↓ | -0.4 | 3.2E-04 | 4.1E-02 |
| chr12:43806843-43807126 | 284  | 3.3 | 2.6 | 3.8 | ↓ | -1.2 | 1.1E-06 | 4.5E-04 |
| chr12:43807917-43808377 | 461  | 4.2 | 3.7 | 4.6 | ↓ | -0.9 | 6.7E-08 | 4.5E-05 |
| chr12:43809370-43809832 | 463  | 3.8 | 3.4 | 4.1 | ↓ | -0.6 | 3.8E-04 | 4.6E-02 |

|                         |      |     |     |     |   |      |         |         |
|-------------------------|------|-----|-----|-----|---|------|---------|---------|
| chr12:43810897-43811622 | 726  | 5.1 | 4.6 | 5.4 | ↓ | -0.9 | 2.4E-11 | 3.1E-08 |
| chr12:43839663-43840267 | 605  | 4.8 | 4.3 | 5.2 | ↓ | -0.9 | 8.2E-11 | 8.8E-08 |
| chr12:44534399-44534938 | 540  | 4.8 | 4.3 | 5.1 | ↓ | -0.8 | 3.6E-06 | 1.2E-03 |
| chr12:4474912-4475253   | 342  | 3.4 | 2.8 | 3.8 | ↓ | -0.9 | 5.9E-06 | 1.7E-03 |
| chr12:45211912-45212377 | 466  | 3.8 | 3.5 | 4.1 | ↓ | -0.6 | 6.6E-04 | 6.9E-02 |
| chr12:45282356-45282695 | 340  | 3.2 | 2.8 | 3.5 | ↓ | -0.7 | 9.0E-04 | 8.6E-02 |
| chr12:4529839-4530948   | 1110 | 5.6 | 5.3 | 5.8 | ↓ | -0.5 | 1.4E-07 | 8.0E-05 |
| chr12:45726052-45726204 | 153  | 2.3 | 1.8 | 2.7 | ↓ | -1.0 | 1.1E-03 | 9.9E-02 |
| chr12:45870808-45871063 | 256  | 3.7 | 3.2 | 4.1 | ↓ | -0.9 | 1.8E-06 | 6.4E-04 |
| chr12:45925390-45925916 | 527  | 5.1 | 4.8 | 5.3 | ↓ | -0.4 | 1.1E-04 | 1.7E-02 |
| chr12:45940724-45941239 | 516  | 5.3 | 4.9 | 5.5 | ↓ | -0.6 | 7.8E-05 | 1.4E-02 |
| chr12:46025406-46025613 | 208  | 2.4 | 1.9 | 2.8 | ↓ | -1.0 | 3.2E-04 | 4.1E-02 |
| chr12:46046773-46047130 | 358  | 3.4 | 3.8 | 2.9 | ↑ | 1.0  | 2.0E-06 | 7.1E-04 |
| chr12:46211935-46212423 | 489  | 3.1 | 2.7 | 3.4 | ↓ | -0.8 | 2.2E-04 | 3.0E-02 |
| chr12:46401674-46401956 | 283  | 2.0 | 2.5 | 1.3 | ↑ | 1.1  | 4.7E-04 | 5.4E-02 |
| chr12:47380334-47380631 | 298  | 2.7 | 3.1 | 2.2 | ↑ | 0.9  | 3.3E-04 | 4.1E-02 |
| chr12:4801416-4802525   | 1110 | 6.8 | 6.6 | 6.9 | ↓ | -0.3 | 5.9E-06 | 1.7E-03 |
| chr12:48080394-48080553 | 160  | 2.5 | 2.8 | 1.9 | ↑ | 0.9  | 1.1E-03 | 9.7E-02 |
| chr12:48098387-48098585 | 199  | 2.8 | 3.1 | 2.3 | ↑ | 0.8  | 8.7E-04 | 8.4E-02 |
| chr12:48137386-48137932 | 547  | 4.8 | 5.0 | 4.5 | ↑ | 0.5  | 1.3E-04 | 2.0E-02 |
| chr12:48184024-48184511 | 488  | 3.9 | 4.2 | 3.6 | ↑ | 0.6  | 9.6E-04 | 9.0E-02 |
| chr12:4821092-4822134   | 1043 | 6.3 | 6.4 | 6.1 | ↑ | 0.3  | 3.9E-04 | 4.6E-02 |
| chr12:4822291-4822796   | 506  | 3.1 | 2.6 | 3.4 | ↓ | -0.8 | 1.7E-04 | 2.5E-02 |
| chr12:48224937-48225114 | 178  | 1.4 | 2.0 | 0.5 | ↑ | 1.5  | 1.5E-04 | 2.3E-02 |
| chr12:48852697-48853114 | 418  | 3.9 | 3.4 | 4.2 | ↓ | -0.8 | 9.9E-07 | 4.2E-04 |
| chr12:48939012-48939370 | 359  | 5.8 | 5.6 | 6.0 | ↓ | -0.5 | 2.7E-04 | 3.6E-02 |
| chr12:48958892-48959171 | 280  | 2.7 | 2.2 | 3.1 | ↓ | -0.8 | 5.7E-04 | 6.3E-02 |
| chr12:48966444-48966761 | 318  | 3.3 | 2.8 | 3.7 | ↓ | -0.9 | 3.8E-06 | 1.2E-03 |
| chr12:49058645-49058807 | 163  | 2.4 | 1.7 | 2.8 | ↓ | -1.2 | 2.7E-05 | 5.8E-03 |
| chr12:49200092-49200303 | 212  | 2.7 | 2.2 | 3.1 | ↓ | -0.9 | 5.8E-04 | 6.3E-02 |
| chr12:49329277-49330346 | 1070 | 5.7 | 5.6 | 5.9 | ↓ | -0.3 | 1.0E-03 | 9.5E-02 |
| chr12:49357339-49357686 | 348  | 3.2 | 2.8 | 3.5 | ↓ | -0.7 | 3.2E-04 | 4.1E-02 |
| chr12:49484038-49484762 | 725  | 6.6 | 6.5 | 6.8 | ↓ | -0.3 | 2.6E-05 | 5.7E-03 |
| chr12:49644919-49645157 | 239  | 3.6 | 3.3 | 3.9 | ↓ | -0.6 | 1.1E-03 | 9.8E-02 |
| chr12:4994689-4995481   | 793  | 5.0 | 4.5 | 5.3 | ↓ | -0.7 | 3.1E-10 | 3.0E-07 |
| chr12:49947623-49948021 | 399  | 5.8 | 6.0 | 5.6 | ↑ | 0.4  | 8.6E-05 | 1.5E-02 |
| chr12:49972156-49972493 | 338  | 3.0 | 3.4 | 2.6 | ↑ | 0.7  | 1.1E-03 | 1.0E-01 |
| chr12:50021755-50024961 | 3207 | 8.9 | 9.1 | 8.7 | ↑ | 0.4  | 1.1E-04 | 1.8E-02 |
| chr12:50062376-50062550 | 175  | 1.8 | 1.1 | 2.3 | ↓ | -1.2 | 4.6E-04 | 5.3E-02 |
| chr12:50073144-50073452 | 309  | 2.7 | 3.1 | 2.0 | ↑ | 1.1  | 1.3E-05 | 3.1E-03 |
| chr12:5071929-5072056   | 128  | 1.5 | 0.7 | 1.9 | ↓ | -1.2 | 9.1E-04 | 8.7E-02 |
| chr12:51544305-51544707 | 403  | 4.6 | 4.2 | 4.9 | ↓ | -0.7 | 2.3E-04 | 3.1E-02 |
| chr12:51610546-51610872 | 327  | 3.1 | 2.7 | 3.4 | ↓ | -0.7 | 4.2E-04 | 4.9E-02 |
| chr12:52409957-52410153 | 197  | 2.2 | 2.7 | 1.6 | ↑ | 1.1  | 2.4E-04 | 3.3E-02 |
| chr12:52460480-52461602 | 1123 | 6.5 | 6.6 | 6.4 | ↑ | 0.2  | 4.4E-04 | 5.2E-02 |
| chr12:52822102-52822540 | 439  | 4.9 | 4.7 | 5.1 | ↓ | -0.5 | 5.4E-05 | 9.9E-03 |
| chr12:53017032-53017572 | 541  | 3.9 | 3.6 | 4.2 | ↓ | -0.6 | 6.9E-04 | 7.1E-02 |



|                         |      |     |     |     |   |      |         |         |
|-------------------------|------|-----|-----|-----|---|------|---------|---------|
| chr12:53532952-53533127 | 176  | 2.7 | 3.1 | 2.3 | ↑ | 0.8  | 1.1E-03 | 9.9E-02 |
| chr12:53540385-53540476 | 92   | 1.4 | 1.9 | 0.5 | ↑ | 1.3  | 7.0E-04 | 7.1E-02 |
| chr12:5382279-5382864   | 586  | 5.8 | 5.4 | 6.0 | ↓ | -0.6 | 2.7E-04 | 3.5E-02 |
| chr12:53994021-53994398 | 378  | 3.2 | 2.7 | 3.5 | ↓ | -0.9 | 2.6E-05 | 5.7E-03 |
| chr12:5455586-5455764   | 179  | 2.0 | 2.4 | 1.3 | ↑ | 1.2  | 2.2E-04 | 3.0E-02 |
| chr12:54654725-54654958 | 234  | 3.2 | 2.6 | 3.7 | ↓ | -1.1 | 2.7E-05 | 5.8E-03 |
| chr12:54655080-54655730 | 651  | 4.0 | 3.4 | 4.4 | ↓ | -1.0 | 5.7E-07 | 2.7E-04 |
| chr12:55457559-55457872 | 314  | 3.2 | 1.9 | 3.9 | ↓ | -2.0 | 3.0E-15 | 7.4E-12 |
| chr12:556656-557164     | 509  | 3.6 | 3.1 | 4.0 | ↓ | -0.9 | 9.8E-07 | 4.2E-04 |
| chr12:5575157-5575344   | 188  | 2.5 | 2.9 | 2.0 | ↑ | 0.9  | 1.1E-03 | 9.8E-02 |
| chr12:55999960-56000328 | 369  | 2.6 | 3.0 | 2.1 | ↑ | 0.9  | 5.8E-04 | 6.3E-02 |
| chr12:56340375-56340574 | 200  | 2.7 | 2.0 | 3.1 | ↓ | -1.1 | 4.2E-05 | 8.3E-03 |
| chr12:56572541-56572815 | 275  | 2.6 | 2.0 | 3.0 | ↓ | -1.0 | 3.8E-05 | 7.7E-03 |
| chr12:5661515-5662031   | 517  | 4.3 | 3.9 | 4.6 | ↓ | -0.6 | 3.9E-06 | 1.2E-03 |
| chr12:56676030-56676416 | 387  | 5.1 | 4.8 | 5.3 | ↓ | -0.5 | 6.9E-04 | 7.1E-02 |
| chr12:56724453-56724688 | 236  | 1.7 | 1.0 | 2.2 | ↓ | -1.2 | 9.0E-04 | 8.6E-02 |
| chr12:56786916-56787276 | 361  | 4.8 | 4.5 | 5.0 | ↓ | -0.4 | 2.6E-04 | 3.4E-02 |
| chr12:56824057-56824544 | 488  | 3.2 | 3.7 | 2.4 | ↑ | 1.3  | 2.8E-09 | 2.3E-06 |
| chr12:56824591-56824775 | 185  | 1.9 | 2.4 | 1.1 | ↑ | 1.3  | 5.7E-05 | 1.0E-02 |
| chr12:56824813-56825231 | 419  | 4.6 | 5.0 | 4.1 | ↑ | 0.9  | 2.2E-06 | 7.7E-04 |
| chr12:56866016-56866506 | 491  | 3.8 | 3.4 | 4.1 | ↓ | -0.8 | 6.4E-05 | 1.2E-02 |
| chr12:56869804-56870138 | 335  | 3.9 | 3.5 | 4.3 | ↓ | -0.8 | 4.9E-06 | 1.5E-03 |
| chr12:56978371-56978766 | 396  | 3.1 | 2.7 | 3.5 | ↓ | -0.8 | 2.3E-04 | 3.1E-02 |
| chr12:56983554-56983925 | 372  | 3.5 | 3.8 | 3.1 | ↑ | 0.7  | 4.2E-04 | 5.0E-02 |
| chr12:56983964-56984929 | 966  | 5.0 | 5.2 | 4.7 | ↑ | 0.5  | 4.4E-04 | 5.2E-02 |
| chr12:56994208-56994594 | 387  | 3.6 | 3.9 | 3.2 | ↑ | 0.7  | 8.3E-05 | 1.4E-02 |
| chr12:57019481-57019925 | 445  | 4.4 | 4.0 | 4.7 | ↓ | -0.7 | 3.8E-07 | 1.9E-04 |
| chr12:57127746-57128436 | 691  | 6.1 | 6.0 | 6.3 | ↓ | -0.2 | 5.1E-04 | 5.8E-02 |
| chr12:57408164-57408778 | 615  | 3.7 | 4.0 | 3.4 | ↑ | 0.6  | 9.1E-04 | 8.7E-02 |
| chr12:57473826-57475461 | 1636 | 6.7 | 6.4 | 6.9 | ↓ | -0.4 | 1.7E-08 | 1.2E-05 |
| chr12:57478119-57478348 | 230  | 2.6 | 2.0 | 3.0 | ↓ | -1.0 | 5.0E-05 | 9.4E-03 |
| chr12:57492531-57494716 | 2186 | 6.3 | 6.2 | 6.4 | ↓ | -0.2 | 4.4E-04 | 5.2E-02 |
| chr12:57508949-57510093 | 1145 | 5.9 | 5.7 | 6.1 | ↓ | -0.3 | 5.1E-04 | 5.8E-02 |
| chr12:57651481-57651756 | 276  | 3.8 | 4.1 | 3.4 | ↑ | 0.7  | 4.1E-05 | 8.1E-03 |
| chr12:57676742-57677390 | 649  | 5.7 | 6.0 | 5.4 | ↑ | 0.6  | 7.2E-05 | 1.3E-02 |
| chr12:57818208-57818753 | 546  | 5.7 | 5.4 | 5.9 | ↓ | -0.4 | 3.6E-05 | 7.5E-03 |
| chr12:57986797-57987011 | 215  | 2.1 | 1.5 | 2.5 | ↓ | -1.0 | 8.4E-04 | 8.2E-02 |
| chr12:58101772-58102028 | 257  | 3.6 | 3.2 | 4.0 | ↓ | -0.8 | 2.5E-05 | 5.6E-03 |
| chr12:58112847-58113687 | 841  | 5.7 | 5.5 | 5.9 | ↓ | -0.4 | 3.6E-06 | 1.2E-03 |
| chr12:58172734-58172986 | 253  | 3.8 | 3.2 | 4.3 | ↓ | -1.1 | 1.0E-09 | 9.1E-07 |
| chr12:58812810-58813176 | 367  | 3.7 | 3.2 | 4.1 | ↓ | -0.9 | 6.2E-06 | 1.7E-03 |
| chr12:59035246-59035552 | 307  | 3.1 | 2.6 | 3.5 | ↓ | -1.0 | 1.1E-05 | 2.6E-03 |
| chr12:59159527-59159762 | 236  | 3.3 | 2.9 | 3.7 | ↓ | -0.7 | 4.5E-04 | 5.2E-02 |
| chr12:59187160-59187661 | 502  | 4.3 | 4.0 | 4.5 | ↓ | -0.5 | 2.9E-04 | 3.8E-02 |
| chr12:59347087-59348383 | 1297 | 5.8 | 6.0 | 5.7 | ↑ | 0.3  | 1.0E-03 | 9.6E-02 |
| chr12:59440563-59442093 | 1531 | 7.1 | 6.9 | 7.2 | ↓ | -0.3 | 5.7E-04 | 6.3E-02 |
| chr12:59560489-59560973 | 485  | 5.6 | 5.5 | 5.8 | ↓ | -0.3 | 7.4E-04 | 7.5E-02 |

|                         |      |     |     |     |   |      |         |         |
|-------------------------|------|-----|-----|-----|---|------|---------|---------|
| chr12:59571840-59572078 | 239  | 2.5 | 2.0 | 2.9 | ↓ | -0.9 | 4.7E-04 | 5.4E-02 |
| chr12:59580262-59581121 | 860  | 4.9 | 4.6 | 5.1 | ↓ | -0.6 | 1.9E-06 | 6.9E-04 |
| chr12:59585995-59586131 | 137  | 1.6 | 0.8 | 2.1 | ↓ | -1.2 | 8.0E-04 | 7.8E-02 |
| chr12:59590200-59591858 | 1659 | 6.9 | 6.6 | 7.0 | ↓ | -0.4 | 7.1E-06 | 1.9E-03 |
| chr12:59626408-59626643 | 236  | 2.4 | 1.8 | 2.9 | ↓ | -1.1 | 5.7E-05 | 1.0E-02 |
| chr12:59637561-59637872 | 312  | 2.6 | 1.9 | 3.0 | ↓ | -1.1 | 3.4E-05 | 7.1E-03 |
| chr12:59655596-59656000 | 405  | 4.7 | 4.4 | 4.9 | ↓ | -0.5 | 2.4E-04 | 3.2E-02 |
| chr12:59660557-59661045 | 489  | 3.4 | 2.9 | 3.8 | ↓ | -1.0 | 7.9E-07 | 3.5E-04 |
| chr12:59697640-59698401 | 762  | 5.5 | 5.3 | 5.7 | ↓ | -0.4 | 9.0E-04 | 8.6E-02 |
| chr12:59708610-59708959 | 350  | 4.6 | 4.2 | 4.8 | ↓ | -0.6 | 1.8E-05 | 4.2E-03 |
| chr12:59753951-59754517 | 567  | 4.0 | 3.6 | 4.2 | ↓ | -0.6 | 1.1E-03 | 9.7E-02 |
| chr12:59760435-59761092 | 658  | 5.0 | 4.6 | 5.3 | ↓ | -0.6 | 1.4E-07 | 8.0E-05 |
| chr12:59879557-59879852 | 296  | 3.7 | 3.2 | 4.0 | ↓ | -0.8 | 2.2E-04 | 3.0E-02 |
| chr12:59884772-59885397 | 626  | 4.7 | 4.4 | 5.0 | ↓ | -0.6 | 2.0E-05 | 4.5E-03 |
| chr12:59885437-59886019 | 583  | 4.1 | 3.7 | 4.5 | ↓ | -0.8 | 8.1E-08 | 5.3E-05 |
| chr12:59913447-59913853 | 407  | 3.3 | 2.6 | 3.8 | ↓ | -1.2 | 9.9E-08 | 6.4E-05 |
| chr12:60019322-60019960 | 639  | 4.1 | 3.8 | 4.4 | ↓ | -0.6 | 5.8E-04 | 6.3E-02 |
| chr12:60047102-60048536 | 1435 | 6.3 | 6.0 | 6.6 | ↓ | -0.6 | 4.5E-10 | 4.2E-07 |
| chr12:60049492-60050063 | 572  | 5.2 | 4.8 | 5.4 | ↓ | -0.6 | 2.0E-07 | 1.1E-04 |
| chr12:60226972-60227213 | 242  | 3.4 | 2.9 | 3.8 | ↓ | -0.9 | 2.7E-04 | 3.5E-02 |
| chr12:60310701-60311064 | 364  | 2.8 | 3.3 | 2.1 | ↑ | 1.2  | 1.7E-06 | 6.3E-04 |
| chr12:60324468-60324819 | 352  | 4.4 | 4.2 | 4.6 | ↓ | -0.5 | 3.7E-04 | 4.5E-02 |
| chr12:60539527-60540189 | 663  | 5.5 | 5.3 | 5.7 | ↓ | -0.4 | 5.4E-04 | 6.0E-02 |
| chr12:60542061-60542314 | 254  | 2.8 | 3.1 | 2.3 | ↑ | 0.8  | 8.6E-04 | 8.4E-02 |
| chr12:60598295-60599035 | 741  | 4.9 | 4.5 | 5.2 | ↓ | -0.7 | 1.1E-08 | 8.7E-06 |
| chr12:60609413-60609957 | 545  | 4.3 | 3.6 | 4.7 | ↓ | -1.1 | 1.1E-11 | 1.6E-08 |
| chr12:60625567-60626534 | 968  | 5.9 | 5.8 | 6.1 | ↓ | -0.3 | 7.2E-04 | 7.3E-02 |
| chr12:60929343-60929748 | 406  | 3.0 | 2.5 | 3.4 | ↓ | -0.9 | 8.1E-05 | 1.4E-02 |
| chr12:60954263-60954441 | 179  | 2.8 | 2.3 | 3.2 | ↓ | -0.9 | 2.1E-04 | 2.9E-02 |
| chr12:61316506-61316885 | 380  | 5.6 | 5.4 | 5.8 | ↓ | -0.4 | 4.2E-06 | 1.3E-03 |
| chr12:61316968-61317499 | 532  | 4.2 | 3.4 | 4.6 | ↓ | -1.2 | 1.1E-13 | 2.1E-10 |
| chr12:61317505-61317705 | 201  | 3.2 | 2.3 | 3.8 | ↓ | -1.5 | 1.6E-08 | 1.2E-05 |
| chr12:61424105-61424683 | 579  | 5.2 | 4.8 | 5.5 | ↓ | -0.7 | 2.4E-07 | 1.3E-04 |
| chr12:61585515-61586033 | 519  | 3.6 | 3.1 | 4.0 | ↓ | -0.9 | 2.2E-06 | 7.7E-04 |
| chr12:61637469-61637918 | 450  | 4.0 | 3.6 | 4.3 | ↓ | -0.7 | 9.4E-06 | 2.3E-03 |
| chr12:61649477-61650112 | 636  | 4.4 | 4.0 | 4.7 | ↓ | -0.7 | 5.9E-05 | 1.1E-02 |
| chr12:61758255-61758460 | 206  | 2.5 | 1.7 | 3.0 | ↓ | -1.2 | 2.2E-05 | 5.1E-03 |
| chr12:61763957-61764154 | 198  | 2.7 | 3.1 | 2.1 | ↑ | 1.0  | 4.1E-05 | 8.2E-03 |
| chr12:61765771-61766236 | 466  | 4.0 | 3.6 | 4.3 | ↓ | -0.7 | 4.4E-06 | 1.3E-03 |
| chr12:61794974-61795508 | 535  | 3.5 | 2.9 | 3.9 | ↓ | -1.0 | 3.0E-06 | 1.0E-03 |
| chr12:61921689-61922074 | 386  | 2.5 | 1.5 | 3.1 | ↓ | -1.5 | 2.5E-08 | 1.8E-05 |
| chr12:61950065-61952628 | 2564 | 7.1 | 7.0 | 7.2 | ↓ | -0.2 | 1.1E-03 | 9.8E-02 |
| chr12:61973734-61974960 | 1227 | 5.2 | 4.9 | 5.4 | ↓ | -0.5 | 4.9E-05 | 9.3E-03 |
| chr12:61980769-61981156 | 388  | 4.6 | 4.3 | 4.8 | ↓ | -0.5 | 9.9E-04 | 9.3E-02 |
| chr12:62255788-62256579 | 792  | 4.9 | 5.1 | 4.7 | ↑ | 0.4  | 8.8E-04 | 8.5E-02 |
| chr12:62264035-62264555 | 521  | 5.2 | 5.0 | 5.3 | ↓ | -0.4 | 5.5E-04 | 6.1E-02 |
| chr12:62667034-62667610 | 577  | 5.2 | 5.3 | 5.0 | ↑ | 0.3  | 7.6E-04 | 7.6E-02 |

|                           |      |     |     |     |   |      |         |         |
|---------------------------|------|-----|-----|-----|---|------|---------|---------|
| chr12:62818005-62818149   | 145  | 1.8 | 2.3 | 1.1 | ↑ | 1.2  | 1.9E-04 | 2.7E-02 |
| chr12:62818679-62819715   | 1037 | 5.3 | 5.4 | 5.1 | ↑ | 0.4  | 1.2E-04 | 1.9E-02 |
| chr12:63095727-63097136   | 1410 | 6.4 | 6.1 | 6.6 | ↓ | -0.5 | 3.8E-05 | 7.7E-03 |
| chr12:63100075-63100334   | 260  | 2.9 | 2.4 | 3.2 | ↓ | -0.8 | 9.6E-04 | 9.0E-02 |
| chr12:63186301-63186783   | 483  | 3.6 | 3.0 | 4.0 | ↓ | -1.1 | 1.5E-06 | 5.9E-04 |
| chr12:63238703-63238989   | 287  | 3.1 | 2.5 | 3.6 | ↓ | -1.0 | 1.1E-06 | 4.3E-04 |
| chr12:63315328-63316348   | 1021 | 5.6 | 5.4 | 5.8 | ↓ | -0.4 | 2.3E-04 | 3.1E-02 |
| chr12:6348555-6348890     | 336  | 3.5 | 3.2 | 3.8 | ↓ | -0.7 | 8.4E-04 | 8.2E-02 |
| chr12:6459481-6459829     | 349  | 2.8 | 2.3 | 3.1 | ↓ | -0.8 | 5.7E-04 | 6.3E-02 |
| chr12:656188-657921       | 1734 | 6.4 | 6.5 | 6.2 | ↑ | 0.3  | 5.3E-04 | 6.0E-02 |
| chr12:6782458-6782827     | 370  | 4.1 | 3.6 | 4.5 | ↓ | -0.9 | 3.5E-06 | 1.2E-03 |
| chr12:7016926-7017593     | 668  | 4.2 | 3.8 | 4.5 | ↓ | -0.7 | 2.2E-05 | 5.1E-03 |
| chr12:7729339-7729742     | 404  | 5.1 | 4.5 | 5.6 | ↓ | -1.1 | 6.2E-13 | 1.0E-09 |
| chr12:7798128-7799143     | 1016 | 6.7 | 6.6 | 6.8 | ↓ | -0.3 | 7.8E-05 | 1.4E-02 |
| chr12:7812175-7812918     | 744  | 4.7 | 4.5 | 4.9 | ↓ | -0.5 | 2.7E-04 | 3.5E-02 |
| chr12:7921599-7921787     | 189  | 2.1 | 1.4 | 2.5 | ↓ | -1.1 | 3.7E-04 | 4.5E-02 |
| chr12:8060331-8060505     | 175  | 2.1 | 2.6 | 1.4 | ↑ | 1.2  | 1.0E-04 | 1.7E-02 |
| chr12:8115785-8116187     | 403  | 3.9 | 3.6 | 4.2 | ↓ | -0.6 | 7.1E-05 | 1.3E-02 |
| chr12:8264334-8264990     | 657  | 5.8 | 5.6 | 6.0 | ↓ | -0.4 | 5.3E-06 | 1.5E-03 |
| chr12:8556730-8556867     | 138  | 1.4 | 0.6 | 1.9 | ↓ | -1.3 | 5.1E-04 | 5.8E-02 |
| chr12:8655137-8655995     | 859  | 5.2 | 4.9 | 5.4 | ↓ | -0.4 | 3.8E-04 | 4.6E-02 |
| chr12:8665415-8665588     | 174  | 1.8 | 1.1 | 2.2 | ↓ | -1.1 | 1.0E-03 | 9.6E-02 |
| chr12:8677461-8677770     | 310  | 3.0 | 2.3 | 3.4 | ↓ | -1.2 | 1.8E-07 | 1.0E-04 |
| chr12:8677831-8678107     | 277  | 2.8 | 2.4 | 3.2 | ↓ | -0.8 | 7.4E-04 | 7.4E-02 |
| chr12:8787849-8788046     | 198  | 2.4 | 1.6 | 2.9 | ↓ | -1.2 | 1.8E-05 | 4.2E-03 |
| chr12:8790417-8790824     | 408  | 4.1 | 3.7 | 4.5 | ↓ | -0.8 | 3.4E-05 | 7.1E-03 |
| chr12:8801900-8802443     | 544  | 3.6 | 3.1 | 4.0 | ↓ | -0.9 | 9.0E-07 | 4.0E-04 |
| chr12:8879384-8880336     | 953  | 5.3 | 4.9 | 5.6 | ↓ | -0.7 | 7.7E-07 | 3.5E-04 |
| chr12:8914073-8915658     | 1586 | 6.1 | 5.9 | 6.2 | ↓ | -0.3 | 1.1E-03 | 9.8E-02 |
| chr12:8928890-8929220     | 331  | 2.8 | 3.2 | 2.3 | ↑ | 1.0  | 1.0E-04 | 1.7E-02 |
| chr12:9001678-9002631     | 954  | 4.6 | 4.2 | 4.9 | ↓ | -0.8 | 2.7E-09 | 2.3E-06 |
| chr12:9028491-9028806     | 316  | 3.0 | 3.4 | 2.4 | ↑ | 1.0  | 1.8E-04 | 2.5E-02 |
| chr12:9029392-9030909     | 1518 | 6.4 | 6.7 | 6.1 | ↑ | 0.6  | 2.8E-04 | 3.6E-02 |
| chr12:9036007-9036495     | 489  | 4.0 | 4.2 | 3.6 | ↑ | 0.6  | 2.0E-04 | 2.8E-02 |
| chr12:9268042-9268443     | 402  | 3.8 | 3.5 | 4.1 | ↓ | -0.7 | 6.1E-04 | 6.6E-02 |
| chr12:9403423-9403790     | 368  | 3.5 | 2.9 | 3.9 | ↓ | -1.0 | 4.2E-07 | 2.1E-04 |
| chr12:9457060-9457581     | 522  | 4.2 | 3.5 | 4.6 | ↓ | -1.1 | 7.0E-13 | 1.1E-09 |
| chr12:9469057-9469225     | 169  | 2.4 | 1.8 | 2.8 | ↓ | -1.0 | 3.6E-04 | 4.4E-02 |
| chr12:958455-958928       | 474  | 3.8 | 4.1 | 3.5 | ↑ | 0.6  | 3.5E-04 | 4.4E-02 |
| chr12:9599640-9599833     | 194  | 2.2 | 1.6 | 2.6 | ↓ | -1.0 | 7.9E-04 | 7.8E-02 |
| chr12:9631788-9632272     | 485  | 4.1 | 3.7 | 4.5 | ↓ | -0.7 | 1.8E-04 | 2.6E-02 |
| chr13:100920909-100921345 | 437  | 2.6 | 2.0 | 3.0 | ↓ | -1.0 | 2.8E-04 | 6.2E-02 |
| chr13:100923515-100924022 | 508  | 2.9 | 2.0 | 3.4 | ↓ | -1.4 | 3.8E-08 | 6.9E-05 |
| chr13:101333208-101333566 | 359  | 2.2 | 2.7 | 1.5 | ↑ | 1.1  | 8.9E-05 | 3.0E-02 |
| chr13:101651405-101651772 | 368  | 2.1 | 2.6 | 1.4 | ↑ | 1.2  | 1.6E-04 | 4.3E-02 |
| chr13:102205859-102206986 | 1128 | 5.3 | 5.7 | 4.6 | ↑ | 1.1  | 3.5E-14 | 2.7E-10 |
| chr13:102308453-102308823 | 371  | 2.5 | 2.9 | 1.9 | ↑ | 1.0  | 1.3E-04 | 3.7E-02 |

|                           |      |     |     |     |   |      |         |         |
|---------------------------|------|-----|-----|-----|---|------|---------|---------|
| chr13:105381184-105381641 | 458  | 3.3 | 3.7 | 2.9 | ↑ | 0.8  | 3.1E-04 | 6.7E-02 |
| chr13:108226363-108226734 | 372  | 2.9 | 2.4 | 3.2 | ↓ | -0.8 | 5.7E-04 | 9.6E-02 |
| chr13:108237970-108238262 | 293  | 1.7 | 0.8 | 2.2 | ↓ | -1.5 | 4.0E-05 | 1.7E-02 |
| chr13:109008866-109009245 | 380  | 2.6 | 1.9 | 3.0 | ↓ | -1.1 | 2.1E-04 | 5.1E-02 |
| chr13:11162249-11163790   | 1542 | 4.8 | 4.6 | 5.0 | ↓ | -0.4 | 5.6E-04 | 9.4E-02 |
| chr13:113432302-113432657 | 356  | 2.2 | 2.6 | 1.6 | ↑ | 1.0  | 4.5E-04 | 8.6E-02 |
| chr13:113445952-113446543 | 592  | 3.2 | 3.5 | 2.7 | ↑ | 0.9  | 2.8E-04 | 6.2E-02 |
| chr13:11369876-11370159   | 284  | 2.1 | 1.3 | 2.6 | ↓ | -1.3 | 2.9E-05 | 1.4E-02 |
| chr13:116927105-116927532 | 428  | 3.6 | 3.0 | 3.9 | ↓ | -0.9 | 1.0E-06 | 9.0E-04 |
| chr13:117042028-117042441 | 414  | 4.4 | 4.2 | 4.7 | ↓ | -0.5 | 5.3E-04 | 9.2E-02 |
| chr13:117142471-117142836 | 366  | 2.1 | 1.4 | 2.6 | ↓ | -1.2 | 6.3E-05 | 2.3E-02 |
| chr13:118846536-118847437 | 902  | 3.9 | 4.2 | 3.5 | ↑ | 0.6  | 1.2E-04 | 3.7E-02 |
| chr13:118850303-118851904 | 1602 | 4.2 | 4.6 | 3.7 | ↑ | 0.9  | 2.2E-07 | 2.6E-04 |
| chr13:119394519-119395142 | 624  | 3.3 | 2.9 | 3.6 | ↓ | -0.7 | 5.6E-04 | 9.4E-02 |
| chr13:119520977-119521689 | 713  | 3.4 | 2.9 | 3.8 | ↓ | -0.9 | 2.1E-04 | 5.1E-02 |
| chr13:12058359-12058972   | 614  | 3.3 | 2.9 | 3.6 | ↓ | -0.7 | 5.4E-04 | 9.3E-02 |
| chr13:120623196-120623726 | 531  | 2.3 | 2.8 | 1.6 | ↑ | 1.2  | 3.2E-05 | 1.5E-02 |
| chr13:120647750-120648494 | 745  | 2.9 | 3.3 | 2.4 | ↑ | 0.9  | 4.9E-04 | 9.0E-02 |
| chr13:121652332-121652873 | 542  | 2.3 | 1.6 | 2.8 | ↓ | -1.3 | 1.5E-05 | 7.9E-03 |
| chr13:122164240-122165514 | 1275 | 4.6 | 4.2 | 4.9 | ↓ | -0.6 | 4.0E-05 | 1.7E-02 |
| chr13:122226272-122226592 | 321  | 2.5 | 1.5 | 3.0 | ↓ | -1.5 | 5.2E-07 | 5.4E-04 |
| chr13:122229063-122229614 | 552  | 2.9 | 2.1 | 3.5 | ↓ | -1.4 | 7.7E-09 | 1.9E-05 |
| chr13:122229807-122230224 | 418  | 2.6 | 1.7 | 3.1 | ↓ | -1.5 | 3.0E-07 | 3.3E-04 |
| chr13:122230893-122231297 | 405  | 2.7 | 1.5 | 3.4 | ↓ | -1.9 | 7.8E-12 | 3.5E-08 |
| chr13:122422432-122423287 | 856  | 4.0 | 3.7 | 4.3 | ↓ | -0.6 | 3.7E-04 | 7.5E-02 |
| chr13:122741824-122742578 | 755  | 4.6 | 4.4 | 4.9 | ↓ | -0.5 | 1.3E-04 | 3.8E-02 |
| chr13:123000506-123001024 | 519  | 2.7 | 3.1 | 2.2 | ↑ | 0.9  | 4.5E-04 | 8.6E-02 |
| chr13:123957458-123958271 | 814  | 4.0 | 3.7 | 4.3 | ↓ | -0.7 | 1.7E-05 | 8.8E-03 |
| chr13:124053865-124054583 | 719  | 3.1 | 2.5 | 3.5 | ↓ | -1.0 | 2.0E-05 | 1.0E-02 |
| chr13:124715775-124717001 | 1227 | 4.5 | 4.1 | 4.8 | ↓ | -0.7 | 1.2E-06 | 1.1E-03 |
| chr13:124753759-124755276 | 1518 | 4.2 | 3.8 | 4.4 | ↓ | -0.6 | 9.6E-05 | 3.0E-02 |
| chr13:124890504-124891566 | 1063 | 3.3 | 2.9 | 3.7 | ↓ | -0.8 | 2.2E-04 | 5.3E-02 |
| chr13:12519742-12520219   | 478  | 2.6 | 2.0 | 3.0 | ↓ | -0.9 | 3.6E-04 | 7.3E-02 |
| chr13:125231847-125232615 | 769  | 3.0 | 2.3 | 3.5 | ↓ | -1.2 | 7.4E-07 | 7.0E-04 |
| chr13:125232652-125232976 | 325  | 2.9 | 2.2 | 3.4 | ↓ | -1.1 | 7.0E-07 | 6.8E-04 |
| chr13:125234080-125236117 | 2038 | 5.7 | 5.4 | 5.9 | ↓ | -0.5 | 3.3E-06 | 2.4E-03 |
| chr13:125675885-125676230 | 346  | 2.0 | 1.3 | 2.5 | ↓ | -1.3 | 8.7E-05 | 2.9E-02 |
| chr13:125677417-125678637 | 1221 | 4.8 | 4.4 | 5.1 | ↓ | -0.6 | 1.5E-05 | 7.9E-03 |
| chr13:125850397-125850865 | 469  | 4.9 | 4.5 | 5.1 | ↓ | -0.6 | 1.7E-05 | 8.8E-03 |
| chr13:126095094-126095500 | 407  | 2.5 | 1.9 | 2.9 | ↓ | -1.0 | 2.9E-04 | 6.5E-02 |
| chr13:126096801-126097384 | 584  | 2.9 | 2.3 | 3.4 | ↓ | -1.2 | 8.3E-06 | 5.2E-03 |
| chr13:129382494-129382900 | 407  | 4.1 | 3.6 | 4.4 | ↓ | -0.7 | 4.5E-06 | 3.2E-03 |
| chr13:129499847-129500128 | 282  | 1.8 | 1.1 | 2.3 | ↓ | -1.2 | 5.2E-04 | 9.2E-02 |
| chr13:129586215-129586821 | 607  | 3.1 | 2.2 | 3.7 | ↓ | -1.5 | 4.1E-11 | 1.7E-07 |
| chr13:129587170-129587559 | 390  | 1.9 | 1.0 | 2.4 | ↓ | -1.4 | 3.2E-05 | 1.5E-02 |
| chr13:129590203-129590875 | 673  | 4.0 | 3.4 | 4.4 | ↓ | -1.0 | 8.1E-08 | 1.2E-04 |
| chr13:130794706-130795293 | 588  | 4.2 | 3.8 | 4.4 | ↓ | -0.6 | 7.7E-05 | 2.7E-02 |

|                           |      |     |     |     |   |      |         |         |
|---------------------------|------|-----|-----|-----|---|------|---------|---------|
| chr13:131575714-131576530 | 817  | 4.9 | 4.6 | 5.1 | ↓ | -0.5 | 8.9E-06 | 5.4E-03 |
| chr13:131690032-131690935 | 904  | 4.0 | 3.7 | 4.3 | ↓ | -0.6 | 4.3E-04 | 8.4E-02 |
| chr13:131942513-131943287 | 775  | 3.0 | 3.4 | 2.5 | ↑ | 0.8  | 1.2E-04 | 3.6E-02 |
| chr13:132055722-132056400 | 679  | 3.2 | 3.5 | 2.8 | ↑ | 0.8  | 2.5E-04 | 5.7E-02 |
| chr13:132177530-132177959 | 430  | 3.1 | 2.6 | 3.4 | ↓ | -0.9 | 1.4E-04 | 4.0E-02 |
| chr13:133156834-133157804 | 971  | 3.2 | 3.6 | 2.7 | ↑ | 0.8  | 8.0E-05 | 2.7E-02 |
| chr13:134323664-134324214 | 551  | 3.0 | 2.5 | 3.3 | ↓ | -0.8 | 3.9E-04 | 7.7E-02 |
| chr13:134324218-134324917 | 700  | 2.9 | 2.2 | 3.3 | ↓ | -1.1 | 2.2E-05 | 1.1E-02 |
| chr13:135620323-135620647 | 325  | 3.2 | 2.7 | 3.6 | ↓ | -0.9 | 6.6E-05 | 2.4E-02 |
| chr13:135718019-135719353 | 1335 | 5.6 | 5.4 | 5.8 | ↓ | -0.4 | 2.0E-04 | 4.9E-02 |
| chr13:135867389-135867793 | 405  | 1.9 | 0.5 | 2.6 | ↓ | -2.1 | 3.9E-09 | 1.1E-05 |
| chr13:135869535-135870099 | 565  | 3.6 | 2.4 | 4.2 | ↓ | -1.8 | 3.6E-16 | 3.3E-12 |
| chr13:13725693-13726797   | 1105 | 4.6 | 4.0 | 5.0 | ↓ | -1.0 | 2.5E-10 | 8.8E-07 |
| chr13:13726877-13727743   | 867  | 3.1 | 2.6 | 3.5 | ↓ | -1.0 | 1.3E-04 | 3.8E-02 |
| chr13:13797634-13798026   | 393  | 2.3 | 2.8 | 1.7 | ↑ | 1.1  | 1.3E-04 | 3.8E-02 |
| chr13:139418046-139418722 | 677  | 3.8 | 3.4 | 4.1 | ↓ | -0.7 | 9.4E-05 | 3.0E-02 |
| chr13:139520547-139521203 | 657  | 2.5 | 1.9 | 3.0 | ↓ | -1.1 | 4.4E-05 | 1.8E-02 |
| chr13:139859323-139860087 | 765  | 5.5 | 5.0 | 5.9 | ↓ | -0.9 | 2.5E-12 | 1.3E-08 |
| chr13:140881190-140882619 | 1430 | 4.6 | 4.9 | 4.2 | ↑ | 0.7  | 1.2E-07 | 1.6E-04 |
| chr13:141109420-141110781 | 1362 | 4.5 | 4.8 | 4.3 | ↑ | 0.5  | 5.0E-05 | 2.0E-02 |
| chr13:141112711-141113952 | 1242 | 4.6 | 4.9 | 4.0 | ↑ | 0.9  | 1.8E-10 | 6.9E-07 |
| chr13:141158774-141159677 | 904  | 3.8 | 4.1 | 3.5 | ↑ | 0.6  | 4.8E-04 | 8.8E-02 |
| chr13:141167437-141169203 | 1767 | 5.2 | 5.5 | 4.9 | ↑ | 0.6  | 4.4E-06 | 3.2E-03 |
| chr13:141241671-141244033 | 2363 | 5.5 | 5.7 | 5.4 | ↑ | 0.3  | 2.0E-04 | 4.9E-02 |
| chr13:141737998-141741046 | 3049 | 7.0 | 7.2 | 6.8 | ↑ | 0.3  | 1.3E-04 | 3.8E-02 |
| chr13:14210513-14211550   | 1038 | 5.0 | 5.2 | 4.8 | ↑ | 0.4  | 1.6E-04 | 4.3E-02 |
| chr13:143326138-143326664 | 527  | 2.4 | 2.8 | 1.9 | ↑ | 1.0  | 4.0E-04 | 7.8E-02 |
| chr13:1452574-1452963     | 390  | 2.4 | 2.8 | 1.9 | ↑ | 0.9  | 5.9E-04 | 9.9E-02 |
| chr13:145949967-145950976 | 1010 | 3.9 | 3.5 | 4.2 | ↓ | -0.6 | 3.6E-04 | 7.3E-02 |
| chr13:146493533-146495330 | 1798 | 4.4 | 4.7 | 4.0 | ↑ | 0.7  | 9.5E-06 | 5.5E-03 |
| chr13:146913155-146914081 | 927  | 3.8 | 3.2 | 4.2 | ↓ | -0.9 | 1.3E-04 | 3.7E-02 |
| chr13:146914419-146919175 | 4757 | 7.7 | 7.4 | 7.9 | ↓ | -0.5 | 2.7E-07 | 3.0E-04 |
| chr13:146919527-146922052 | 2526 | 6.8 | 6.6 | 6.9 | ↓ | -0.4 | 7.7E-05 | 2.7E-02 |
| chr13:147307508-147308321 | 814  | 3.5 | 3.8 | 3.0 | ↑ | 0.8  | 3.5E-05 | 1.6E-02 |
| chr13:147422453-147423075 | 623  | 3.1 | 3.4 | 2.6 | ↑ | 0.8  | 5.0E-04 | 9.0E-02 |
| chr13:150065453-150065803 | 351  | 2.7 | 3.1 | 2.2 | ↑ | 0.9  | 2.8E-04 | 6.1E-02 |
| chr13:150144869-150145291 | 423  | 2.7 | 2.1 | 3.1 | ↓ | -1.0 | 5.2E-05 | 2.0E-02 |
| chr13:155162842-155163357 | 516  | 2.1 | 1.4 | 2.5 | ↓ | -1.1 | 2.4E-04 | 5.7E-02 |
| chr13:155228153-155228591 | 439  | 2.3 | 1.8 | 2.7 | ↓ | -1.0 | 4.7E-04 | 8.6E-02 |
| chr13:155918542-155919087 | 546  | 3.1 | 2.4 | 3.6 | ↓ | -1.2 | 7.8E-08 | 1.2E-04 |
| chr13:155981255-155982673 | 1419 | 5.1 | 5.3 | 4.9 | ↑ | 0.5  | 7.1E-05 | 2.5E-02 |
| chr13:156338152-156339042 | 891  | 4.7 | 4.3 | 4.9 | ↓ | -0.7 | 5.9E-08 | 9.5E-05 |
| chr13:156835983-156836259 | 277  | 2.1 | 1.4 | 2.6 | ↓ | -1.1 | 3.6E-04 | 7.3E-02 |
| chr13:157030771-157031140 | 370  | 2.5 | 1.5 | 3.1 | ↓ | -1.6 | 5.1E-08 | 8.6E-05 |
| chr13:157693362-157693810 | 449  | 3.9 | 3.4 | 4.3 | ↓ | -0.9 | 4.7E-06 | 3.4E-03 |
| chr13:160563922-160564648 | 727  | 3.9 | 3.5 | 4.2 | ↓ | -0.7 | 5.4E-06 | 3.6E-03 |
| chr13:161282457-161282893 | 437  | 3.8 | 3.3 | 4.2 | ↓ | -0.9 | 2.6E-06 | 2.0E-03 |

|                           |      |     |     |     |   |      |         |         |
|---------------------------|------|-----|-----|-----|---|------|---------|---------|
| chr13:163023166-163024013 | 848  | 3.5 | 2.9 | 4.0 | ↓ | -1.0 | 1.6E-07 | 2.0E-04 |
| chr13:163025494-163025860 | 367  | 2.6 | 2.0 | 3.0 | ↓ | -1.0 | 3.8E-04 | 7.6E-02 |
| chr13:163026245-163028881 | 2637 | 5.9 | 5.2 | 6.4 | ↓ | -1.2 | 9.1E-32 | 4.1E-27 |
| chr13:163031642-163031920 | 279  | 2.1 | 1.4 | 2.6 | ↓ | -1.2 | 2.6E-04 | 5.8E-02 |
| chr13:163113568-163114313 | 746  | 3.7 | 3.2 | 4.1 | ↓ | -0.9 | 6.4E-07 | 6.4E-04 |
| chr13:163417267-163417632 | 366  | 2.2 | 1.6 | 2.7 | ↓ | -1.1 | 1.0E-04 | 3.2E-02 |
| chr13:1644446-1645726     | 1281 | 4.2 | 3.7 | 4.5 | ↓ | -0.9 | 3.1E-06 | 2.4E-03 |
| chr13:166325806-166326556 | 751  | 4.3 | 3.9 | 4.6 | ↓ | -0.6 | 5.4E-05 | 2.0E-02 |
| chr13:168517303-168517677 | 375  | 2.0 | 2.5 | 1.4 | ↑ | 1.1  | 4.3E-04 | 8.4E-02 |
| chr13:169271250-169271774 | 525  | 2.6 | 3.0 | 2.1 | ↑ | 0.9  | 5.7E-04 | 9.6E-02 |
| chr13:169381816-169384970 | 3155 | 7.0 | 7.2 | 6.8 | ↑ | 0.3  | 4.5E-04 | 8.6E-02 |
| chr13:17772923-17773358   | 436  | 2.6 | 1.9 | 3.0 | ↓ | -1.2 | 1.4E-05 | 7.7E-03 |
| chr13:178525437-178527054 | 1618 | 5.0 | 4.3 | 5.5 | ↓ | -1.3 | 6.6E-14 | 4.3E-10 |
| chr13:185719915-185720210 | 296  | 1.6 | 2.1 | 0.9 | ↑ | 1.3  | 4.7E-04 | 8.6E-02 |
| chr13:18605380-18605791   | 412  | 3.3 | 2.8 | 3.6 | ↓ | -0.8 | 5.0E-04 | 9.0E-02 |
| chr13:186418410-186418757 | 348  | 1.9 | 1.2 | 2.4 | ↓ | -1.2 | 1.8E-04 | 4.6E-02 |
| chr13:190516323-190516708 | 386  | 3.6 | 3.2 | 3.9 | ↓ | -0.7 | 2.3E-04 | 5.5E-02 |
| chr13:191092883-191093441 | 559  | 2.6 | 1.8 | 3.1 | ↓ | -1.3 | 5.9E-05 | 2.2E-02 |
| chr13:191181993-191182684 | 692  | 3.5 | 3.1 | 3.8 | ↓ | -0.7 | 2.2E-04 | 5.4E-02 |
| chr13:19308727-19309577   | 851  | 4.6 | 4.1 | 4.9 | ↓ | -0.8 | 7.9E-09 | 1.9E-05 |
| chr13:19315050-19315650   | 601  | 2.6 | 2.1 | 3.0 | ↓ | -1.0 | 2.4E-04 | 5.7E-02 |
| chr13:19392455-19393069   | 615  | 3.4 | 3.7 | 3.0 | ↑ | 0.7  | 4.6E-04 | 8.6E-02 |
| chr13:199337554-199338164 | 611  | 2.9 | 3.3 | 2.3 | ↑ | 1.0  | 4.7E-05 | 1.9E-02 |
| chr13:199338189-199339452 | 1264 | 4.4 | 4.6 | 4.1 | ↑ | 0.6  | 5.3E-05 | 2.0E-02 |
| chr13:19970997-19971830   | 834  | 3.0 | 2.6 | 3.4 | ↓ | -0.8 | 2.5E-04 | 5.7E-02 |
| chr13:201049506-201049824 | 319  | 3.0 | 2.5 | 3.4 | ↓ | -0.9 | 1.8E-04 | 4.6E-02 |
| chr13:201888024-201888358 | 335  | 2.5 | 1.8 | 3.0 | ↓ | -1.2 | 5.1E-06 | 3.5E-03 |
| chr13:202362769-202363186 | 418  | 3.2 | 3.6 | 2.6 | ↑ | 1.0  | 5.6E-06 | 3.7E-03 |
| chr13:203108939-203109660 | 722  | 4.0 | 3.6 | 4.3 | ↓ | -0.7 | 3.0E-04 | 6.5E-02 |
| chr13:204621609-204622008 | 400  | 3.8 | 3.4 | 4.1 | ↓ | -0.6 | 2.3E-04 | 5.4E-02 |
| chr13:204863801-204864389 | 589  | 4.0 | 3.7 | 4.3 | ↓ | -0.6 | 5.2E-04 | 9.2E-02 |
| chr13:20539660-20540475   | 816  | 4.4 | 4.0 | 4.7 | ↓ | -0.7 | 2.3E-04 | 5.5E-02 |
| chr13:206172429-206173409 | 981  | 4.3 | 3.7 | 4.7 | ↓ | -0.9 | 3.7E-07 | 4.0E-04 |
| chr13:206531294-206531597 | 304  | 1.9 | 1.2 | 2.4 | ↓ | -1.2 | 4.7E-04 | 8.6E-02 |
| chr13:208168932-208170395 | 1464 | 5.4 | 5.2 | 5.6 | ↓ | -0.5 | 7.8E-06 | 4.9E-03 |
| chr13:208266134-208267302 | 1169 | 4.4 | 4.1 | 4.6 | ↓ | -0.5 | 1.6E-04 | 4.4E-02 |
| chr13:208272140-208273656 | 1517 | 5.8 | 5.6 | 5.9 | ↓ | -0.4 | 5.4E-04 | 9.3E-02 |
| chr13:208285308-208285926 | 619  | 3.6 | 3.1 | 4.0 | ↓ | -0.9 | 1.5E-06 | 1.2E-03 |
| chr13:208299003-208299849 | 847  | 3.7 | 3.1 | 4.1 | ↓ | -1.0 | 4.1E-08 | 7.2E-05 |
| chr13:208302585-208303066 | 482  | 2.6 | 2.0 | 3.0 | ↓ | -1.0 | 3.0E-04 | 6.6E-02 |
| chr13:208348150-208348559 | 410  | 2.8 | 2.2 | 3.2 | ↓ | -1.0 | 3.2E-05 | 1.5E-02 |
| chr13:208376337-208377366 | 1030 | 4.2 | 3.8 | 4.6 | ↓ | -0.7 | 6.7E-05 | 2.4E-02 |
| chr13:208477578-208478812 | 1235 | 5.2 | 4.9 | 5.4 | ↓ | -0.4 | 9.5E-05 | 3.0E-02 |
| chr13:208591413-208592083 | 671  | 3.3 | 2.9 | 3.7 | ↓ | -0.8 | 6.5E-05 | 2.3E-02 |
| chr13:208650748-208651587 | 840  | 4.5 | 4.1 | 4.8 | ↓ | -0.7 | 9.9E-06 | 5.6E-03 |
| chr13:208722894-208723506 | 613  | 2.9 | 2.3 | 3.3 | ↓ | -1.0 | 1.2E-05 | 6.4E-03 |
| chr13:208910100-208910825 | 726  | 4.1 | 3.1 | 4.7 | ↓ | -1.6 | 2.0E-16 | 2.3E-12 |

|                           |      |     |     |     |   |      |         |         |
|---------------------------|------|-----|-----|-----|---|------|---------|---------|
| chr13:209054732-209055260 | 529  | 2.9 | 2.4 | 3.2 | ↓ | -0.8 | 5.1E-04 | 9.1E-02 |
| chr13:209067884-209068317 | 434  | 2.0 | 1.2 | 2.5 | ↓ | -1.3 | 8.9E-05 | 3.0E-02 |
| chr13:209104024-209104501 | 478  | 3.1 | 2.1 | 3.7 | ↓ | -1.6 | 2.3E-09 | 6.6E-06 |
| chr13:209106073-209107968 | 1896 | 5.6 | 5.1 | 6.0 | ↓ | -0.9 | 2.4E-22 | 3.6E-18 |
| chr13:209111318-209112005 | 688  | 3.3 | 2.4 | 3.9 | ↓ | -1.4 | 1.8E-09 | 5.4E-06 |
| chr13:209114093-209115609 | 1517 | 5.2 | 4.4 | 5.7 | ↓ | -1.2 | 5.0E-28 | 1.1E-23 |
| chr13:209115679-209116243 | 565  | 2.7 | 1.8 | 3.3 | ↓ | -1.5 | 1.9E-08 | 3.7E-05 |
| chr13:209130940-209131801 | 862  | 4.0 | 3.4 | 4.4 | ↓ | -0.9 | 8.9E-07 | 8.1E-04 |
| chr13:209136127-209137211 | 1085 | 3.8 | 3.3 | 4.2 | ↓ | -0.9 | 3.4E-07 | 3.7E-04 |
| chr13:209137262-209137843 | 582  | 4.3 | 3.8 | 4.7 | ↓ | -0.9 | 1.8E-07 | 2.1E-04 |
| chr13:209149240-209149851 | 612  | 2.9 | 2.4 | 3.3 | ↓ | -0.9 | 1.7E-04 | 4.5E-02 |
| chr13:209175763-209176228 | 466  | 3.0 | 2.4 | 3.4 | ↓ | -1.0 | 9.0E-06 | 5.5E-03 |
| chr13:209195086-209195493 | 408  | 2.5 | 1.9 | 3.0 | ↓ | -1.1 | 1.8E-04 | 4.6E-02 |
| chr13:209197557-209198236 | 680  | 2.8 | 2.0 | 3.3 | ↓ | -1.3 | 9.8E-06 | 5.6E-03 |
| chr13:209221749-209222363 | 615  | 4.5 | 4.2 | 4.7 | ↓ | -0.5 | 4.1E-04 | 8.1E-02 |
| chr13:209234870-209235821 | 952  | 4.2 | 3.5 | 4.6 | ↓ | -1.2 | 1.8E-08 | 3.6E-05 |
| chr13:209249694-209250347 | 654  | 2.9 | 2.3 | 3.4 | ↓ | -1.1 | 6.7E-06 | 4.4E-03 |
| chr13:209250375-209251040 | 666  | 3.7 | 3.1 | 4.1 | ↓ | -1.1 | 7.7E-08 | 1.2E-04 |
| chr13:210559949-210560642 | 694  | 3.4 | 2.8 | 3.8 | ↓ | -0.9 | 1.7E-04 | 4.5E-02 |
| chr13:211292488-211293538 | 1051 | 3.8 | 3.5 | 4.1 | ↓ | -0.7 | 7.9E-05 | 2.7E-02 |
| chr13:212439227-212439643 | 417  | 2.8 | 2.0 | 3.3 | ↓ | -1.3 | 1.3E-06 | 1.1E-03 |
| chr13:212442703-212444212 | 1510 | 5.1 | 4.8 | 5.3 | ↓ | -0.5 | 9.2E-06 | 5.5E-03 |
| chr13:213033381-213033850 | 470  | 3.0 | 3.3 | 2.5 | ↑ | 0.9  | 9.3E-05 | 3.0E-02 |
| chr13:213091098-213091488 | 391  | 2.8 | 2.3 | 3.2 | ↓ | -0.9 | 2.0E-04 | 5.0E-02 |
| chr13:213440073-213441724 | 1652 | 5.4 | 5.6 | 5.2 | ↑ | 0.5  | 7.7E-07 | 7.2E-04 |
| chr13:213646437-213647277 | 841  | 3.8 | 3.4 | 4.2 | ↓ | -0.8 | 1.3E-04 | 3.8E-02 |
| chr13:214067477-214068026 | 550  | 4.5 | 4.2 | 4.8 | ↓ | -0.5 | 2.3E-04 | 5.5E-02 |
| chr13:214734044-214734656 | 613  | 2.4 | 1.6 | 2.9 | ↓ | -1.3 | 5.2E-05 | 2.0E-02 |
| chr13:215321413-215324772 | 3360 | 6.9 | 6.8 | 7.0 | ↓ | -0.2 | 5.8E-04 | 9.7E-02 |
| chr13:215719675-215721719 | 2045 | 8.2 | 8.1 | 8.3 | ↓ | -0.2 | 3.7E-04 | 7.5E-02 |
| chr13:216783215-216784681 | 1467 | 6.8 | 6.6 | 6.9 | ↓ | -0.2 | 5.1E-04 | 9.1E-02 |
| chr13:217472058-217473352 | 1295 | 4.8 | 5.0 | 4.6 | ↑ | 0.4  | 5.3E-04 | 9.2E-02 |
| chr13:218006320-218011510 | 5191 | 8.3 | 8.2 | 8.4 | ↓ | -0.2 | 1.5E-04 | 4.1E-02 |
| chr13:23871273-23871593   | 321  | 2.4 | 1.8 | 2.8 | ↓ | -1.1 | 3.5E-04 | 7.2E-02 |
| chr13:25002024-25002924   | 901  | 4.8 | 4.4 | 5.1 | ↓ | -0.7 | 1.8E-04 | 4.6E-02 |
| chr13:25621353-25621910   | 558  | 2.8 | 3.1 | 2.3 | ↑ | 0.9  | 2.4E-04 | 5.6E-02 |
| chr13:27828490-27829815   | 1326 | 4.4 | 4.0 | 4.7 | ↓ | -0.7 | 1.5E-05 | 7.9E-03 |
| chr13:27986016-27986311   | 296  | 2.4 | 2.8 | 1.8 | ↑ | 1.0  | 1.6E-04 | 4.4E-02 |
| chr13:29361420-29361778   | 359  | 2.4 | 2.9 | 1.9 | ↑ | 1.0  | 2.6E-04 | 5.9E-02 |
| chr13:30527257-30528115   | 859  | 3.6 | 3.9 | 3.3 | ↑ | 0.6  | 5.3E-04 | 9.2E-02 |
| chr13:34045521-34045793   | 273  | 1.9 | 2.3 | 1.2 | ↑ | 1.2  | 4.5E-04 | 8.6E-02 |
| chr13:36024916-36027454   | 2539 | 6.5 | 6.3 | 6.6 | ↓ | -0.3 | 5.4E-04 | 9.3E-02 |
| chr13:37327790-37328196   | 407  | 2.2 | 1.6 | 2.7 | ↓ | -1.0 | 5.3E-04 | 9.2E-02 |
| chr13:3827374-3827727     | 354  | 2.7 | 3.1 | 2.2 | ↑ | 0.9  | 3.7E-04 | 7.5E-02 |
| chr13:39183706-39184032   | 327  | 2.0 | 1.3 | 2.5 | ↓ | -1.1 | 5.2E-04 | 9.2E-02 |
| chr13:40610403-40611797   | 1395 | 4.8 | 4.5 | 5.0 | ↓ | -0.5 | 5.3E-05 | 2.0E-02 |
| chr13:40936288-40937045   | 758  | 3.1 | 2.3 | 3.6 | ↓ | -1.2 | 6.4E-07 | 6.4E-04 |

|                         |      |     |     |     |   |      |         |         |
|-------------------------|------|-----|-----|-----|---|------|---------|---------|
| chr13:41500774-41501081 | 308  | 1.8 | 1.0 | 2.3 | ↓ | -1.3 | 3.6E-04 | 7.3E-02 |
| chr13:41620617-41621189 | 573  | 2.7 | 1.6 | 3.2 | ↓ | -1.6 | 1.5E-08 | 3.2E-05 |
| chr13:44593273-44593534 | 262  | 1.7 | 2.2 | 0.9 | ↑ | 1.4  | 3.2E-04 | 6.8E-02 |
| chr13:45841928-45842499 | 572  | 3.7 | 3.4 | 4.0 | ↓ | -0.7 | 4.7E-04 | 8.6E-02 |
| chr13:47681982-47682598 | 617  | 4.0 | 3.6 | 4.2 | ↓ | -0.6 | 3.0E-04 | 6.5E-02 |
| chr13:47690534-47691645 | 1112 | 5.0 | 4.7 | 5.2 | ↓ | -0.5 | 9.5E-05 | 3.0E-02 |
| chr13:50699842-50701304 | 1463 | 4.8 | 5.1 | 4.5 | ↑ | 0.5  | 7.6E-06 | 4.9E-03 |
| chr13:52652748-52653927 | 1180 | 5.0 | 4.6 | 5.3 | ↓ | -0.7 | 3.6E-08 | 6.8E-05 |
| chr13:52676747-52677240 | 494  | 3.6 | 3.0 | 4.1 | ↓ | -1.1 | 1.6E-07 | 2.0E-04 |
| chr13:54166986-54167162 | 177  | 1.7 | 1.0 | 2.2 | ↓ | -1.2 | 6.0E-04 | 1.0E-01 |
| chr13:55150582-55151357 | 776  | 3.5 | 3.0 | 3.9 | ↓ | -0.8 | 9.4E-05 | 3.0E-02 |
| chr13:55818008-55818370 | 363  | 2.5 | 2.9 | 1.9 | ↑ | 1.0  | 4.4E-04 | 8.6E-02 |
| chr13:55936422-55937008 | 587  | 3.7 | 3.2 | 4.0 | ↓ | -0.8 | 3.3E-04 | 7.0E-02 |
| chr13:56111802-56112286 | 485  | 2.4 | 1.4 | 2.9 | ↓ | -1.5 | 1.1E-07 | 1.4E-04 |
| chr13:56516601-56517544 | 944  | 4.0 | 3.6 | 4.3 | ↓ | -0.6 | 1.7E-04 | 4.5E-02 |
| chr13:57434522-57435760 | 1239 | 4.0 | 3.6 | 4.3 | ↓ | -0.7 | 1.1E-05 | 6.0E-03 |
| chr13:57563664-57564582 | 919  | 3.5 | 3.8 | 3.1 | ↑ | 0.6  | 5.5E-04 | 9.4E-02 |
| chr13:57601647-57602174 | 528  | 3.4 | 3.0 | 3.8 | ↓ | -0.8 | 2.2E-05 | 1.1E-02 |
| chr13:58380789-58381321 | 533  | 3.1 | 2.4 | 3.6 | ↓ | -1.2 | 8.6E-08 | 1.2E-04 |
| chr13:58963630-58963946 | 317  | 2.5 | 2.9 | 1.8 | ↑ | 1.0  | 1.9E-04 | 4.8E-02 |
| chr13:59115591-59116462 | 872  | 3.5 | 3.8 | 3.1 | ↑ | 0.7  | 1.9E-04 | 4.9E-02 |
| chr13:59181215-59183484 | 2270 | 6.0 | 5.7 | 6.2 | ↓ | -0.5 | 3.7E-05 | 1.6E-02 |
| chr13:59611485-59611863 | 379  | 1.7 | 0.7 | 2.3 | ↓ | -1.5 | 2.2E-05 | 1.1E-02 |
| chr13:5966220-5966536   | 317  | 2.0 | 1.0 | 2.6 | ↓ | -1.6 | 1.7E-06 | 1.4E-03 |
| chr13:61293011-61293764 | 754  | 4.1 | 3.6 | 4.4 | ↓ | -0.8 | 2.0E-05 | 1.0E-02 |
| chr13:61551443-61551967 | 525  | 3.8 | 3.4 | 4.1 | ↓ | -0.7 | 2.9E-05 | 1.4E-02 |
| chr13:61626026-61626765 | 740  | 4.3 | 3.9 | 4.7 | ↓ | -0.8 | 8.0E-05 | 2.7E-02 |
| chr13:61671656-61672238 | 583  | 2.9 | 2.3 | 3.3 | ↓ | -1.0 | 1.2E-04 | 3.7E-02 |
| chr13:65793008-65793559 | 552  | 2.0 | 2.5 | 1.2 | ↑ | 1.3  | 1.1E-04 | 3.4E-02 |
| chr13:65797202-65797544 | 343  | 2.1 | 2.7 | 1.1 | ↑ | 1.5  | 5.1E-06 | 3.5E-03 |
| chr13:67300824-67301433 | 610  | 2.8 | 2.3 | 3.2 | ↓ | -0.9 | 2.6E-04 | 5.8E-02 |
| chr13:68820987-68821275 | 289  | 2.8 | 2.3 | 3.2 | ↓ | -0.9 | 2.2E-04 | 5.4E-02 |
| chr13:69529882-69530479 | 598  | 2.3 | 2.8 | 1.5 | ↑ | 1.3  | 6.2E-06 | 4.1E-03 |
| chr13:70999744-71000035 | 292  | 1.5 | 2.1 | 0.5 | ↑ | 1.6  | 3.7E-05 | 1.6E-02 |
| chr13:71679476-71679952 | 477  | 3.5 | 3.9 | 2.9 | ↑ | 1.0  | 1.4E-06 | 1.2E-03 |
| chr13:73834906-73835569 | 664  | 3.1 | 2.6 | 3.5 | ↓ | -0.9 | 1.4E-04 | 3.9E-02 |
| chr13:74216542-74217152 | 611  | 4.4 | 4.0 | 4.8 | ↓ | -0.8 | 2.9E-06 | 2.2E-03 |
| chr13:75191705-75191972 | 268  | 2.6 | 3.0 | 2.0 | ↑ | 0.9  | 4.6E-04 | 8.6E-02 |
| chr13:75630601-75631170 | 570  | 3.7 | 3.2 | 4.0 | ↓ | -0.9 | 1.7E-06 | 1.3E-03 |
| chr13:76004396-76004781 | 386  | 3.6 | 3.2 | 3.9 | ↓ | -0.7 | 3.8E-05 | 1.7E-02 |
| chr13:76345507-76345889 | 383  | 2.6 | 2.1 | 3.0 | ↓ | -0.9 | 3.3E-04 | 6.9E-02 |
| chr13:7689943-7690329   | 387  | 2.1 | 1.4 | 2.6 | ↓ | -1.2 | 1.4E-04 | 3.9E-02 |
| chr13:77534346-77534717 | 372  | 2.3 | 2.8 | 1.6 | ↑ | 1.1  | 1.0E-04 | 3.2E-02 |
| chr13:77590710-77591408 | 699  | 3.3 | 3.6 | 2.9 | ↑ | 0.7  | 3.3E-04 | 6.9E-02 |
| chr13:77664567-77665734 | 1168 | 4.3 | 4.7 | 3.9 | ↑ | 0.8  | 4.5E-04 | 8.6E-02 |
| chr13:77667299-77668209 | 911  | 4.0 | 4.2 | 3.7 | ↑ | 0.6  | 3.2E-04 | 6.8E-02 |
| chr13:78702985-78704016 | 1032 | 5.4 | 5.2 | 5.6 | ↓ | -0.4 | 1.2E-04 | 3.7E-02 |



|                           |      |     |     |     |   |      |         |         |
|---------------------------|------|-----|-----|-----|---|------|---------|---------|
| chr13:78836958-78837656   | 699  | 4.2 | 3.8 | 4.5 | ↓ | -0.7 | 2.9E-04 | 6.3E-02 |
| chr13:79103598-79105929   | 2332 | 6.4 | 6.2 | 6.5 | ↓ | -0.3 | 3.9E-05 | 1.7E-02 |
| chr13:79564563-79565311   | 749  | 4.5 | 4.2 | 4.8 | ↓ | -0.6 | 1.2E-04 | 3.7E-02 |
| chr13:79573287-79574593   | 1307 | 6.0 | 5.7 | 6.2 | ↓ | -0.5 | 4.5E-04 | 8.6E-02 |
| chr13:79913139-79913729   | 591  | 4.2 | 3.8 | 4.6 | ↓ | -0.8 | 1.8E-05 | 9.0E-03 |
| chr13:7991991-7993871     | 1881 | 5.6 | 5.8 | 5.3 | ↑ | 0.6  | 5.4E-05 | 2.0E-02 |
| chr13:7995932-7996794     | 863  | 4.0 | 4.4 | 3.4 | ↑ | 1.0  | 1.0E-08 | 2.3E-05 |
| chr13:8049226-8049624     | 399  | 1.9 | 2.4 | 1.1 | ↑ | 1.3  | 1.5E-04 | 4.0E-02 |
| chr13:81635055-81635575   | 521  | 2.7 | 2.1 | 3.1 | ↓ | -1.0 | 3.9E-04 | 7.7E-02 |
| chr13:82796371-82798104   | 1734 | 5.0 | 4.7 | 5.2 | ↓ | -0.5 | 1.9E-04 | 4.9E-02 |
| chr13:82831283-82831701   | 419  | 3.4 | 2.6 | 3.9 | ↓ | -1.3 | 6.6E-10 | 2.2E-06 |
| chr13:83261585-83262057   | 473  | 2.8 | 2.2 | 3.2 | ↓ | -1.0 | 5.1E-05 | 2.0E-02 |
| chr13:83269651-83270603   | 953  | 3.1 | 3.4 | 2.6 | ↑ | 0.8  | 5.4E-04 | 9.3E-02 |
| chr13:83679130-83679409   | 280  | 1.7 | 2.2 | 0.9 | ↑ | 1.3  | 1.4E-04 | 3.9E-02 |
| chr13:86949560-86951780   | 2221 | 5.9 | 5.7 | 6.0 | ↓ | -0.3 | 4.6E-05 | 1.8E-02 |
| chr13:87344439-87345648   | 1210 | 4.2 | 3.9 | 4.4 | ↓ | -0.6 | 9.6E-05 | 3.0E-02 |
| chr13:87348389-87350628   | 2240 | 5.8 | 5.6 | 6.0 | ↓ | -0.3 | 1.8E-04 | 4.7E-02 |
| chr13:88831926-88833265   | 1340 | 6.1 | 5.8 | 6.4 | ↓ | -0.6 | 1.8E-07 | 2.1E-04 |
| chr13:89275482-89275938   | 457  | 2.8 | 3.2 | 2.2 | ↑ | 1.0  | 1.2E-04 | 3.7E-02 |
| chr13:90114253-90114614   | 362  | 3.5 | 3.1 | 3.8 | ↓ | -0.6 | 4.6E-04 | 8.6E-02 |
| chr13:90308646-90309204   | 559  | 3.3 | 2.8 | 3.6 | ↓ | -0.8 | 5.9E-05 | 2.2E-02 |
| chr13:90325420-90325828   | 409  | 2.9 | 2.4 | 3.3 | ↓ | -0.9 | 5.0E-04 | 9.0E-02 |
| chr13:9105407-9105950     | 544  | 2.3 | 1.6 | 2.8 | ↓ | -1.2 | 3.9E-05 | 1.7E-02 |
| chr13:91734546-91735675   | 1130 | 5.1 | 4.9 | 5.2 | ↓ | -0.4 | 3.5E-04 | 7.3E-02 |
| chr13:91856353-91857320   | 968  | 3.8 | 4.1 | 3.3 | ↑ | 0.8  | 2.7E-04 | 6.1E-02 |
| chr13:91966360-91966843   | 484  | 3.0 | 3.4 | 2.5 | ↑ | 0.9  | 3.6E-05 | 1.6E-02 |
| chr13:91970332-91970717   | 386  | 2.0 | 2.5 | 1.2 | ↑ | 1.4  | 3.9E-05 | 1.7E-02 |
| chr13:93041703-93042006   | 304  | 1.8 | 2.3 | 1.1 | ↑ | 1.3  | 3.8E-04 | 7.6E-02 |
| chr13:97333050-97333645   | 596  | 3.1 | 1.9 | 3.7 | ↓ | -1.8 | 4.0E-13 | 2.3E-09 |
| chr13:97333761-97334049   | 289  | 2.1 | 1.3 | 2.7 | ↓ | -1.4 | 2.7E-05 | 1.3E-02 |
| chr13:97638294-97639312   | 1019 | 3.1 | 2.6 | 3.5 | ↓ | -0.9 | 2.6E-04 | 5.8E-02 |
| chr13:99136405-99136782   | 378  | 2.1 | 1.3 | 2.7 | ↓ | -1.4 | 9.5E-06 | 5.5E-03 |
| chr13:99297949-99298404   | 456  | 2.0 | 1.2 | 2.5 | ↓ | -1.3 | 7.1E-05 | 2.5E-02 |
| chr14:100352856-100353638 | 783  | 5.2 | 4.9 | 5.4 | ↓ | -0.5 | 8.6E-06 | 3.8E-03 |
| chr14:100353714-100354115 | 402  | 2.6 | 2.1 | 2.9 | ↓ | -0.9 | 6.0E-04 | 8.3E-02 |
| chr14:100355416-100355818 | 403  | 2.8 | 2.1 | 3.3 | ↓ | -1.1 | 3.1E-06 | 1.8E-03 |
| chr14:100376484-100376832 | 349  | 3.0 | 2.4 | 3.4 | ↓ | -0.9 | 3.4E-05 | 1.2E-02 |
| chr14:100394875-100395221 | 347  | 3.6 | 2.6 | 4.1 | ↓ | -1.5 | 7.0E-10 | 1.5E-06 |
| chr14:100425068-100426764 | 1697 | 6.8 | 6.6 | 6.9 | ↓ | -0.4 | 1.7E-04 | 3.9E-02 |
| chr14:103347649-103347986 | 338  | 2.2 | 2.6 | 1.5 | ↑ | 1.1  | 2.4E-04 | 4.9E-02 |
| chr14:106394604-106394983 | 380  | 2.8 | 2.2 | 3.3 | ↓ | -1.1 | 6.9E-06 | 3.4E-03 |
| chr14:106478842-106479473 | 632  | 2.7 | 1.9 | 3.2 | ↓ | -1.3 | 3.3E-07 | 2.9E-04 |
| chr14:106479515-106479899 | 385  | 2.4 | 1.8 | 2.8 | ↓ | -1.0 | 3.1E-04 | 5.6E-02 |
| chr14:107593739-107594013 | 275  | 3.0 | 2.5 | 3.3 | ↓ | -0.8 | 6.6E-04 | 8.8E-02 |
| chr14:107927738-107928083 | 346  | 2.7 | 3.1 | 2.1 | ↑ | 0.9  | 4.5E-04 | 7.1E-02 |
| chr14:108405171-108406066 | 896  | 4.2 | 3.8 | 4.5 | ↓ | -0.7 | 8.3E-05 | 2.3E-02 |
| chr14:109203563-109203885 | 323  | 1.9 | 2.4 | 1.0 | ↑ | 1.4  | 7.0E-05 | 2.0E-02 |

|                           |      |     |     |     |   |      |         |         |
|---------------------------|------|-----|-----|-----|---|------|---------|---------|
| chr14:109963652-109964369 | 718  | 3.3 | 3.7 | 2.9 | ↑ | 0.8  | 1.6E-04 | 3.8E-02 |
| chr14:11010537-11011893   | 1357 | 5.4 | 5.2 | 5.6 | ↓ | -0.5 | 1.3E-04 | 3.3E-02 |
| chr14:11064819-11065855   | 1037 | 4.5 | 4.0 | 4.9 | ↓ | -0.8 | 3.8E-08 | 5.0E-05 |
| chr14:11065912-11068154   | 2243 | 6.2 | 5.7 | 6.6 | ↓ | -0.8 | 3.2E-12 | 1.5E-08 |
| chr14:11068267-11068763   | 497  | 2.9 | 2.2 | 3.3 | ↓ | -1.1 | 3.2E-06 | 1.8E-03 |
| chr14:111759374-111759720 | 347  | 2.1 | 1.5 | 2.6 | ↓ | -1.1 | 2.5E-04 | 4.9E-02 |
| chr14:113931712-113932171 | 460  | 3.1 | 2.6 | 3.5 | ↓ | -0.9 | 5.1E-05 | 1.6E-02 |
| chr14:114202827-114203725 | 899  | 3.6 | 3.2 | 4.0 | ↓ | -0.8 | 8.6E-06 | 3.8E-03 |
| chr14:115017752-115018260 | 509  | 3.1 | 2.5 | 3.6 | ↓ | -1.2 | 6.9E-05 | 2.0E-02 |
| chr14:115123108-115123361 | 254  | 1.9 | 1.3 | 2.4 | ↓ | -1.2 | 2.8E-04 | 5.2E-02 |
| chr14:116625914-116626672 | 759  | 3.7 | 3.3 | 4.0 | ↓ | -0.7 | 4.8E-04 | 7.3E-02 |
| chr14:11671181-11671683   | 503  | 3.8 | 4.0 | 3.4 | ↑ | 0.6  | 6.2E-04 | 8.5E-02 |
| chr14:116852276-116852616 | 341  | 2.3 | 1.6 | 2.7 | ↓ | -1.1 | 4.7E-04 | 7.3E-02 |
| chr14:11689503-11690743   | 1241 | 5.6 | 5.4 | 5.7 | ↓ | -0.4 | 1.1E-04 | 2.7E-02 |
| chr14:117603895-117604458 | 564  | 4.0 | 3.6 | 4.2 | ↓ | -0.6 | 5.1E-04 | 7.7E-02 |
| chr14:117760267-117760606 | 340  | 3.1 | 2.7 | 3.5 | ↓ | -0.8 | 7.1E-04 | 9.2E-02 |
| chr14:117915822-117916020 | 199  | 1.5 | 0.5 | 2.1 | ↓ | -1.6 | 8.7E-05 | 2.4E-02 |
| chr14:117971909-117972160 | 252  | 1.6 | 2.1 | 0.8 | ↑ | 1.3  | 4.0E-04 | 6.6E-02 |
| chr14:118304269-118304755 | 487  | 3.0 | 3.4 | 2.6 | ↑ | 0.8  | 6.9E-04 | 9.1E-02 |
| chr14:118349987-118350369 | 383  | 2.4 | 2.9 | 1.8 | ↑ | 1.0  | 1.5E-04 | 3.6E-02 |
| chr14:120102148-120102419 | 272  | 1.9 | 1.2 | 2.4 | ↓ | -1.1 | 5.2E-04 | 7.7E-02 |
| chr14:120154656-120156793 | 2138 | 6.3 | 5.8 | 6.7 | ↓ | -0.9 | 8.8E-13 | 5.0E-09 |
| chr14:120170244-120171636 | 1393 | 4.6 | 3.7 | 5.2 | ↓ | -1.5 | 4.0E-12 | 1.5E-08 |
| chr14:120171958-120172427 | 470  | 2.5 | 1.5 | 3.1 | ↓ | -1.6 | 2.8E-08 | 3.9E-05 |
| chr14:120176737-120177274 | 538  | 2.6 | 1.9 | 3.0 | ↓ | -1.1 | 1.7E-05 | 6.9E-03 |
| chr14:120186281-120186644 | 364  | 2.2 | 1.5 | 2.6 | ↓ | -1.1 | 4.2E-04 | 6.8E-02 |
| chr14:120241427-120242557 | 1131 | 6.0 | 6.2 | 5.8 | ↑ | 0.4  | 7.9E-09 | 1.4E-05 |
| chr14:121931863-121933359 | 1497 | 5.2 | 5.6 | 4.8 | ↑ | 0.8  | 7.8E-07 | 5.7E-04 |
| chr14:121952010-121952363 | 354  | 2.3 | 1.3 | 2.9 | ↓ | -1.6 | 2.1E-07 | 2.0E-04 |
| chr14:121953176-121954614 | 1439 | 5.9 | 6.2 | 5.5 | ↑ | 0.8  | 8.6E-11 | 2.7E-07 |
| chr14:121954942-121956579 | 1638 | 5.3 | 5.5 | 5.0 | ↑ | 0.5  | 2.1E-05 | 8.2E-03 |
| chr14:121958335-121960363 | 2029 | 5.5 | 5.7 | 5.2 | ↑ | 0.5  | 1.4E-05 | 5.9E-03 |
| chr14:122174373-122174716 | 344  | 2.7 | 3.0 | 2.2 | ↑ | 0.9  | 6.4E-04 | 8.6E-02 |
| chr14:123038066-123038491 | 426  | 3.0 | 2.5 | 3.3 | ↓ | -0.8 | 2.8E-04 | 5.2E-02 |
| chr14:12326886-12327245   | 360  | 3.7 | 3.2 | 4.0 | ↓ | -0.8 | 7.1E-05 | 2.0E-02 |
| chr14:12388001-12388504   | 504  | 4.3 | 4.0 | 4.6 | ↓ | -0.6 | 2.9E-05 | 1.0E-02 |
| chr14:124456577-124457624 | 1048 | 4.9 | 4.5 | 5.3 | ↓ | -0.8 | 1.4E-08 | 2.4E-05 |
| chr14:124463130-124463718 | 589  | 4.1 | 3.7 | 4.4 | ↓ | -0.6 | 4.0E-04 | 6.6E-02 |
| chr14:124620113-124620561 | 449  | 2.9 | 2.4 | 3.3 | ↓ | -0.9 | 4.9E-04 | 7.5E-02 |
| chr14:125485486-125485926 | 441  | 2.5 | 1.8 | 3.0 | ↓ | -1.2 | 2.6E-05 | 9.4E-03 |
| chr14:126371633-126371991 | 359  | 3.6 | 3.1 | 4.0 | ↓ | -0.9 | 4.1E-05 | 1.3E-02 |
| chr14:12854366-12855083   | 718  | 4.8 | 4.4 | 5.1 | ↓ | -0.7 | 4.5E-07 | 3.7E-04 |
| chr14:12899234-12899671   | 438  | 3.5 | 3.2 | 3.9 | ↓ | -0.7 | 1.7E-04 | 3.8E-02 |
| chr14:130453329-130453593 | 265  | 3.7 | 3.4 | 4.0 | ↓ | -0.6 | 2.7E-04 | 5.2E-02 |
| chr14:130461079-130461483 | 405  | 2.4 | 1.8 | 2.9 | ↓ | -1.1 | 2.0E-04 | 4.2E-02 |
| chr14:130461644-130461848 | 205  | 1.8 | 0.8 | 2.4 | ↓ | -1.5 | 1.3E-05 | 5.4E-03 |
| chr14:130461936-130462389 | 454  | 2.9 | 1.8 | 3.5 | ↓ | -1.6 | 6.5E-10 | 1.5E-06 |

|                           |      |     |     |     |   |      |         |         |
|---------------------------|------|-----|-----|-----|---|------|---------|---------|
| chr14:130463743-130464488 | 746  | 2.8 | 2.1 | 3.3 | ↓ | -1.2 | 1.1E-06 | 7.6E-04 |
| chr14:130464538-130464879 | 342  | 3.3 | 2.2 | 3.9 | ↓ | -1.7 | 6.8E-13 | 4.3E-09 |
| chr14:131102571-131103264 | 694  | 4.0 | 3.5 | 4.3 | ↓ | -0.8 | 5.4E-06 | 2.8E-03 |
| chr14:132404047-132405639 | 1593 | 5.0 | 4.4 | 5.5 | ↓ | -1.1 | 5.8E-09 | 1.1E-05 |
| chr14:133027718-133028062 | 345  | 2.0 | 1.2 | 2.5 | ↓ | -1.3 | 2.1E-04 | 4.4E-02 |
| chr14:133131870-133132165 | 296  | 2.5 | 1.9 | 2.9 | ↓ | -0.9 | 5.0E-04 | 7.5E-02 |
| chr14:133281605-133281833 | 229  | 2.1 | 1.4 | 2.5 | ↓ | -1.1 | 5.7E-04 | 8.0E-02 |
| chr14:133284877-133285144 | 268  | 2.5 | 1.9 | 2.9 | ↓ | -0.9 | 3.7E-04 | 6.3E-02 |
| chr14:13334443-13335131   | 689  | 3.8 | 4.0 | 3.5 | ↑ | 0.6  | 8.1E-04 | 1.0E-01 |
| chr14:133489181-133489837 | 657  | 4.0 | 3.5 | 4.3 | ↓ | -0.8 | 2.3E-05 | 8.4E-03 |
| chr14:134374923-134375505 | 583  | 3.5 | 3.2 | 3.8 | ↓ | -0.6 | 8.0E-04 | 9.9E-02 |
| chr14:134383252-134383568 | 317  | 2.6 | 2.1 | 3.0 | ↓ | -0.9 | 4.0E-04 | 6.6E-02 |
| chr14:134391800-134393156 | 1357 | 5.1 | 4.9 | 5.3 | ↓ | -0.4 | 1.7E-04 | 3.9E-02 |
| chr14:134693012-134693223 | 212  | 1.8 | 1.0 | 2.3 | ↓ | -1.3 | 2.5E-04 | 4.9E-02 |
| chr14:134702274-134703911 | 1638 | 5.7 | 5.5 | 6.0 | ↓ | -0.5 | 1.3E-05 | 5.4E-03 |
| chr14:134730757-134731356 | 600  | 3.8 | 3.3 | 4.2 | ↓ | -0.9 | 5.0E-05 | 1.6E-02 |
| chr14:134766618-134767373 | 756  | 4.5 | 4.7 | 4.1 | ↑ | 0.6  | 7.0E-06 | 3.4E-03 |
| chr14:135045068-135045384 | 317  | 2.1 | 1.5 | 2.6 | ↓ | -1.0 | 7.4E-04 | 9.4E-02 |
| chr14:135567452-135568640 | 1189 | 5.5 | 5.3 | 5.7 | ↓ | -0.4 | 9.8E-05 | 2.6E-02 |
| chr14:135850390-135851126 | 737  | 4.5 | 4.7 | 4.3 | ↑ | 0.5  | 5.2E-04 | 7.7E-02 |
| chr14:135864234-135864831 | 598  | 3.2 | 2.8 | 3.6 | ↓ | -0.8 | 3.5E-05 | 1.2E-02 |
| chr14:13731573-13732084   | 512  | 3.5 | 3.1 | 3.8 | ↓ | -0.7 | 1.1E-04 | 2.9E-02 |
| chr14:137640751-137641491 | 741  | 4.2 | 4.5 | 4.0 | ↑ | 0.5  | 7.6E-04 | 9.6E-02 |
| chr14:138803119-138803609 | 491  | 2.3 | 2.7 | 1.6 | ↑ | 1.1  | 1.5E-04 | 3.5E-02 |
| chr14:138948958-138949855 | 898  | 4.8 | 4.6 | 5.0 | ↓ | -0.4 | 2.3E-04 | 4.6E-02 |
| chr14:139603437-139603772 | 336  | 3.6 | 3.1 | 4.0 | ↓ | -0.9 | 5.4E-06 | 2.8E-03 |
| chr14:139721011-139721457 | 447  | 2.6 | 3.0 | 2.1 | ↑ | 0.9  | 8.2E-04 | 1.0E-01 |
| chr14:140080739-140081147 | 409  | 3.4 | 2.6 | 3.9 | ↓ | -1.3 | 3.1E-10 | 8.1E-07 |
| chr14:140255071-140255403 | 333  | 2.6 | 3.0 | 2.0 | ↑ | 1.0  | 1.2E-04 | 2.9E-02 |
| chr14:140729408-140729904 | 497  | 3.9 | 3.5 | 4.1 | ↓ | -0.6 | 7.0E-04 | 9.1E-02 |
| chr14:140807472-140808136 | 665  | 5.7 | 5.5 | 5.9 | ↓ | -0.3 | 5.5E-04 | 7.9E-02 |
| chr14:140920900-140922122 | 1223 | 4.8 | 4.5 | 5.0 | ↓ | -0.5 | 1.3E-04 | 3.2E-02 |
| chr14:141014959-141015453 | 495  | 3.4 | 3.0 | 3.7 | ↓ | -0.8 | 2.8E-04 | 5.2E-02 |
| chr14:141705328-141705692 | 365  | 3.2 | 2.8 | 3.6 | ↓ | -0.8 | 3.9E-04 | 6.6E-02 |
| chr14:142181388-142181642 | 255  | 2.6 | 1.9 | 3.0 | ↓ | -1.1 | 4.4E-05 | 1.4E-02 |
| chr14:142415954-142416542 | 589  | 3.9 | 3.5 | 4.1 | ↓ | -0.6 | 3.2E-04 | 5.6E-02 |
| chr14:142417898-142418659 | 762  | 5.4 | 5.1 | 5.6 | ↓ | -0.5 | 7.8E-05 | 2.2E-02 |
| chr14:143013003-143014220 | 1218 | 4.8 | 5.1 | 4.4 | ↑ | 0.8  | 2.5E-06 | 1.5E-03 |
| chr14:143051410-143054247 | 2838 | 6.4 | 6.6 | 6.3 | ↑ | 0.3  | 2.9E-04 | 5.3E-02 |
| chr14:14320645-14320925   | 281  | 2.5 | 1.7 | 3.0 | ↓ | -1.3 | 1.7E-06 | 1.0E-03 |
| chr14:14321216-14321570   | 355  | 2.3 | 1.6 | 2.8 | ↓ | -1.1 | 1.7E-04 | 3.8E-02 |
| chr14:143551925-143552368 | 444  | 2.9 | 3.2 | 2.4 | ↑ | 0.8  | 2.9E-04 | 5.4E-02 |
| chr14:143718929-143719393 | 465  | 2.6 | 2.9 | 2.0 | ↑ | 0.9  | 5.3E-04 | 7.7E-02 |
| chr14:144651383-144651849 | 467  | 4.0 | 3.7 | 4.3 | ↓ | -0.6 | 1.2E-04 | 2.9E-02 |
| chr14:145022803-145024124 | 1322 | 5.2 | 5.0 | 5.4 | ↓ | -0.4 | 5.1E-04 | 7.7E-02 |
| chr14:1451329-1451757     | 429  | 3.2 | 2.7 | 3.5 | ↓ | -0.8 | 1.7E-04 | 3.9E-02 |
| chr14:145172866-145173297 | 432  | 3.2 | 3.7 | 2.4 | ↑ | 1.3  | 2.0E-09 | 4.0E-06 |

|                           |      |     |     |     |   |      |         |         |
|---------------------------|------|-----|-----|-----|---|------|---------|---------|
| chr14:145173343-145175661 | 2319 | 5.6 | 5.9 | 5.3 | ↑ | 0.6  | 8.9E-07 | 6.3E-04 |
| chr14:145186837-145189206 | 2370 | 6.2 | 6.4 | 6.0 | ↑ | 0.4  | 3.8E-06 | 2.1E-03 |
| chr14:145214197-145215479 | 1283 | 4.3 | 4.6 | 4.0 | ↑ | 0.6  | 4.2E-05 | 1.4E-02 |
| chr14:1456683-1457535     | 853  | 4.1 | 3.6 | 4.4 | ↓ | -0.8 | 4.5E-07 | 3.7E-04 |
| chr14:145973871-145975133 | 1263 | 5.5 | 5.2 | 5.7 | ↓ | -0.5 | 1.2E-04 | 2.9E-02 |
| chr14:146070923-146071359 | 437  | 2.7 | 3.1 | 2.1 | ↑ | 1.0  | 2.1E-04 | 4.4E-02 |
| chr14:146302031-146302996 | 966  | 5.4 | 5.2 | 5.6 | ↓ | -0.4 | 5.2E-04 | 7.7E-02 |
| chr14:146699522-146699763 | 242  | 2.3 | 1.8 | 2.7 | ↓ | -1.0 | 8.0E-04 | 9.9E-02 |
| chr14:146812286-146814190 | 1905 | 6.7 | 6.5 | 6.8 | ↓ | -0.3 | 1.8E-04 | 4.1E-02 |
| chr14:147238394-147238890 | 497  | 3.4 | 3.0 | 3.7 | ↓ | -0.7 | 6.4E-04 | 8.6E-02 |
| chr14:147250713-147251178 | 466  | 3.1 | 2.7 | 3.4 | ↓ | -0.7 | 4.9E-04 | 7.5E-02 |
| chr14:147631000-147632630 | 1631 | 6.4 | 6.2 | 6.6 | ↓ | -0.4 | 1.0E-05 | 4.4E-03 |
| chr14:147831186-147831963 | 778  | 4.8 | 5.0 | 4.5 | ↑ | 0.5  | 2.5E-04 | 4.9E-02 |
| chr14:149002153-149003009 | 857  | 4.9 | 4.7 | 5.1 | ↓ | -0.5 | 6.5E-04 | 8.7E-02 |
| chr14:149251437-149252018 | 582  | 4.0 | 3.4 | 4.4 | ↓ | -1.0 | 8.5E-10 | 1.8E-06 |
| chr14:149321661-149322499 | 839  | 4.6 | 4.8 | 4.3 | ↑ | 0.5  | 1.1E-04 | 2.8E-02 |
| chr14:149331196-149332932 | 1737 | 5.9 | 5.4 | 6.3 | ↓ | -0.8 | 9.2E-15 | 1.2E-10 |
| chr14:149419494-149419856 | 363  | 2.6 | 3.0 | 1.9 | ↑ | 1.1  | 1.9E-04 | 4.2E-02 |
| chr14:149578699-149579356 | 658  | 3.9 | 3.6 | 4.2 | ↓ | -0.6 | 6.8E-04 | 8.9E-02 |
| chr14:149866599-149867098 | 500  | 4.2 | 3.8 | 4.5 | ↓ | -0.7 | 2.3E-04 | 4.7E-02 |
| chr14:149872613-149873532 | 920  | 5.0 | 4.5 | 5.3 | ↓ | -0.8 | 7.3E-06 | 3.4E-03 |
| chr14:150101241-150101666 | 426  | 2.7 | 1.9 | 3.2 | ↓ | -1.3 | 1.6E-06 | 9.8E-04 |
| chr14:150240143-150240384 | 242  | 2.6 | 2.0 | 3.1 | ↓ | -1.1 | 6.7E-05 | 2.0E-02 |
| chr14:150558232-150560131 | 1900 | 6.7 | 6.4 | 6.9 | ↓ | -0.4 | 1.5E-08 | 2.5E-05 |
| chr14:150701844-150702191 | 348  | 3.1 | 2.6 | 3.4 | ↓ | -0.8 | 5.3E-04 | 7.7E-02 |
| chr14:150730227-150730718 | 492  | 3.8 | 3.4 | 4.1 | ↓ | -0.7 | 2.8E-04 | 5.2E-02 |
| chr14:150886921-150892824 | 5904 | 8.8 | 8.5 | 9.0 | ↓ | -0.5 | 5.7E-18 | 1.5E-13 |
| chr14:150902771-150905129 | 2359 | 7.9 | 7.7 | 8.0 | ↓ | -0.2 | 4.6E-04 | 7.2E-02 |
| chr14:150934252-150936431 | 2180 | 6.7 | 6.5 | 6.8 | ↓ | -0.3 | 3.2E-04 | 5.6E-02 |
| chr14:150968259-150969736 | 1478 | 5.6 | 5.4 | 5.8 | ↓ | -0.4 | 3.0E-04 | 5.4E-02 |
| chr14:150985958-150986363 | 406  | 3.4 | 2.9 | 3.8 | ↓ | -0.9 | 1.0E-04 | 2.6E-02 |
| chr14:151005007-151008055 | 3049 | 7.7 | 7.5 | 7.8 | ↓ | -0.3 | 2.5E-08 | 3.6E-05 |
| chr14:151269096-151272113 | 3018 | 7.4 | 7.3 | 7.5 | ↓ | -0.2 | 3.2E-04 | 5.6E-02 |
| chr14:151273541-151274333 | 793  | 4.8 | 4.3 | 5.1 | ↓ | -0.7 | 1.2E-07 | 1.2E-04 |
| chr14:151346207-151349996 | 3790 | 7.8 | 7.6 | 7.9 | ↓ | -0.4 | 1.5E-06 | 9.6E-04 |
| chr14:151361749-151362076 | 328  | 2.5 | 1.9 | 2.9 | ↓ | -0.9 | 6.2E-04 | 8.4E-02 |
| chr14:151365008-151365902 | 895  | 5.3 | 5.0 | 5.5 | ↓ | -0.4 | 7.1E-04 | 9.2E-02 |
| chr14:151385970-151387216 | 1247 | 5.5 | 5.2 | 5.7 | ↓ | -0.5 | 1.2E-06 | 8.2E-04 |
| chr14:151467796-151468972 | 1177 | 6.3 | 6.0 | 6.5 | ↓ | -0.5 | 8.3E-06 | 3.7E-03 |
| chr14:151556413-151557967 | 1555 | 6.7 | 6.4 | 6.8 | ↓ | -0.4 | 3.4E-06 | 1.9E-03 |
| chr14:151564742-151566396 | 1655 | 6.2 | 6.0 | 6.3 | ↓ | -0.3 | 1.9E-04 | 4.2E-02 |
| chr14:151603797-151605507 | 1711 | 6.5 | 6.4 | 6.6 | ↓ | -0.2 | 8.1E-04 | 1.0E-01 |
| chr14:151634068-151636487 | 2420 | 7.1 | 7.0 | 7.2 | ↓ | -0.2 | 5.0E-04 | 7.6E-02 |
| chr14:151700651-151702852 | 2202 | 6.2 | 6.0 | 6.4 | ↓ | -0.4 | 5.5E-04 | 7.9E-02 |
| chr14:151755008-151755379 | 372  | 3.0 | 2.5 | 3.4 | ↓ | -0.9 | 8.4E-05 | 2.3E-02 |
| chr14:151797692-151799018 | 1327 | 6.5 | 6.3 | 6.6 | ↓ | -0.3 | 1.7E-05 | 6.8E-03 |
| chr14:151810863-151813989 | 3127 | 7.2 | 7.1 | 7.3 | ↓ | -0.2 | 1.1E-04 | 2.8E-02 |

|                           |       |     |     |     |   |      |         |         |
|---------------------------|-------|-----|-----|-----|---|------|---------|---------|
| chr14:151902842-151904704 | 1863  | 6.5 | 6.3 | 6.6 | ↓ | -0.2 | 1.6E-04 | 3.7E-02 |
| chr14:151950450-151951449 | 1000  | 5.0 | 4.6 | 5.4 | ↓ | -0.8 | 2.2E-06 | 1.3E-03 |
| chr14:151986484-151998368 | 11885 | 9.3 | 9.2 | 9.3 | ↓ | -0.1 | 7.6E-04 | 9.6E-02 |
| chr14:152003738-152010365 | 6628  | 8.7 | 8.6 | 8.8 | ↓ | -0.2 | 3.4E-07 | 3.0E-04 |
| chr14:152021460-152023031 | 1572  | 6.1 | 5.9 | 6.3 | ↓ | -0.3 | 2.1E-04 | 4.4E-02 |
| chr14:152213140-152216623 | 3484  | 7.4 | 7.2 | 7.5 | ↓ | -0.3 | 7.3E-08 | 8.5E-05 |
| chr14:152216781-152221032 | 4252  | 8.3 | 8.2 | 8.5 | ↓ | -0.3 | 5.1E-06 | 2.7E-03 |
| chr14:152246914-152248276 | 1363  | 5.6 | 5.4 | 5.8 | ↓ | -0.4 | 2.6E-04 | 5.0E-02 |
| chr14:152268382-152276368 | 7987  | 9.1 | 9.0 | 9.1 | ↓ | -0.2 | 2.1E-04 | 4.4E-02 |
| chr14:152277415-152278807 | 1393  | 5.5 | 5.2 | 5.7 | ↓ | -0.5 | 2.8E-07 | 2.6E-04 |
| chr14:15287519-15289536   | 2018  | 5.7 | 5.9 | 5.5 | ↑ | 0.4  | 8.1E-04 | 9.9E-02 |
| chr14:152932107-152939378 | 7272  | 8.7 | 8.6 | 8.8 | ↓ | -0.1 | 3.7E-05 | 1.2E-02 |
| chr14:153795552-153799743 | 4192  | 7.7 | 7.6 | 7.8 | ↓ | -0.2 | 6.8E-05 | 2.0E-02 |
| chr14:15483332-15483747   | 416   | 3.1 | 2.6 | 3.4 | ↓ | -0.8 | 6.0E-04 | 8.3E-02 |
| chr14:15527044-15527433   | 390   | 3.9 | 4.2 | 3.6 | ↑ | 0.6  | 5.5E-04 | 7.9E-02 |
| chr14:1592393-1592973     | 581   | 4.0 | 4.2 | 3.6 | ↑ | 0.6  | 4.5E-04 | 7.1E-02 |
| chr14:15961079-15961449   | 371   | 3.2 | 2.8 | 3.6 | ↓ | -0.8 | 4.2E-04 | 6.8E-02 |
| chr14:16017516-16017861   | 346   | 2.1 | 2.5 | 1.4 | ↑ | 1.1  | 2.5E-04 | 4.9E-02 |
| chr14:16049621-16050256   | 636   | 2.3 | 3.0 | 1.2 | ↑ | 1.7  | 4.0E-07 | 3.4E-04 |
| chr14:16279463-16280541   | 1079  | 5.1 | 4.7 | 5.4 | ↓ | -0.7 | 4.2E-08 | 5.5E-05 |
| chr14:17320624-17321180   | 557   | 2.7 | 3.1 | 2.2 | ↑ | 0.9  | 8.2E-04 | 1.0E-01 |
| chr14:17510978-17512244   | 1267  | 4.8 | 5.2 | 4.4 | ↑ | 0.7  | 3.8E-08 | 5.0E-05 |
| chr14:17512993-17513404   | 412   | 3.5 | 4.1 | 2.5 | ↑ | 1.5  | 1.1E-12 | 5.5E-09 |
| chr14:17517541-17518166   | 626   | 3.0 | 3.5 | 2.3 | ↑ | 1.2  | 5.5E-07 | 4.3E-04 |
| chr14:17518670-17519234   | 565   | 2.5 | 3.0 | 1.7 | ↑ | 1.3  | 1.5E-04 | 3.6E-02 |
| chr14:17521264-17521750   | 487   | 2.2 | 2.7 | 1.4 | ↑ | 1.4  | 2.2E-05 | 8.3E-03 |
| chr14:17525206-17525625   | 420   | 2.6 | 3.1 | 2.0 | ↑ | 1.1  | 3.8E-05 | 1.3E-02 |
| chr14:17526386-17527856   | 1471  | 4.9 | 5.4 | 4.1 | ↑ | 1.2  | 2.5E-15 | 4.2E-11 |
| chr14:17532357-17533224   | 868   | 3.5 | 4.0 | 2.8 | ↑ | 1.3  | 9.2E-08 | 1.0E-04 |
| chr14:17537156-17537500   | 345   | 2.1 | 2.6 | 1.5 | ↑ | 1.1  | 2.9E-04 | 5.3E-02 |
| chr14:17538467-17539013   | 547   | 2.4 | 2.9 | 1.5 | ↑ | 1.4  | 1.3E-06 | 8.5E-04 |
| chr14:17605865-17606228   | 364   | 4.0 | 3.7 | 4.3 | ↓ | -0.6 | 3.7E-04 | 6.3E-02 |
| chr14:17936020-17936469   | 450   | 3.0 | 3.3 | 2.5 | ↑ | 0.9  | 2.0E-04 | 4.3E-02 |
| chr14:19268995-19269284   | 290   | 2.2 | 1.5 | 2.7 | ↓ | -1.2 | 5.0E-05 | 1.6E-02 |
| chr14:19576354-19578887   | 2534  | 6.3 | 6.0 | 6.5 | ↓ | -0.5 | 2.1E-08 | 3.1E-05 |
| chr14:20066438-20066667   | 230   | 1.7 | 2.2 | 0.9 | ↑ | 1.2  | 5.0E-04 | 7.5E-02 |
| chr14:21675541-21675999   | 459   | 3.3 | 2.3 | 3.9 | ↓ | -1.6 | 2.6E-10 | 7.4E-07 |
| chr14:21930628-21931808   | 1181  | 6.4 | 6.2 | 6.5 | ↓ | -0.3 | 1.9E-04 | 4.2E-02 |
| chr14:22021034-22021639   | 606   | 4.6 | 4.3 | 4.9 | ↓ | -0.6 | 5.2E-05 | 1.6E-02 |
| chr14:22045766-22046958   | 1193  | 5.5 | 5.2 | 5.7 | ↓ | -0.4 | 1.5E-04 | 3.6E-02 |
| chr14:22100641-22102424   | 1784  | 5.4 | 5.2 | 5.6 | ↓ | -0.4 | 2.9E-04 | 5.4E-02 |
| chr14:23445321-23445653   | 333   | 1.9 | 1.2 | 2.4 | ↓ | -1.2 | 4.3E-04 | 6.9E-02 |
| chr14:252506-252698       | 193   | 2.1 | 1.4 | 2.6 | ↓ | -1.3 | 2.4E-05 | 8.8E-03 |
| chr14:25771518-25771755   | 238   | 2.4 | 1.7 | 2.8 | ↓ | -1.2 | 3.8E-05 | 1.3E-02 |
| chr14:25841559-25841825   | 267   | 2.0 | 2.4 | 1.3 | ↑ | 1.1  | 7.6E-04 | 9.6E-02 |
| chr14:26102433-26103231   | 799   | 3.9 | 3.4 | 4.2 | ↓ | -0.8 | 8.4E-05 | 2.3E-02 |
| chr14:26546145-26546489   | 345   | 3.5 | 2.9 | 3.9 | ↓ | -1.0 | 6.2E-06 | 3.2E-03 |

|                         |      |     |     |     |   |      |         |         |
|-------------------------|------|-----|-----|-----|---|------|---------|---------|
| chr14:27815932-27816516 | 585  | 3.4 | 2.9 | 3.8 | ↓ | -0.8 | 5.3E-05 | 1.6E-02 |
| chr14:28179979-28180362 | 384  | 2.5 | 1.7 | 3.0 | ↓ | -1.4 | 7.0E-07 | 5.2E-04 |
| chr14:28522518-28523008 | 491  | 3.9 | 3.3 | 4.3 | ↓ | -1.1 | 1.8E-08 | 2.9E-05 |
| chr14:28527264-28527622 | 359  | 2.2 | 1.6 | 2.6 | ↓ | -1.0 | 4.7E-04 | 7.2E-02 |
| chr14:28679861-28680345 | 485  | 2.5 | 2.9 | 2.0 | ↑ | 0.9  | 3.3E-04 | 5.8E-02 |
| chr14:29343396-29343981 | 586  | 4.3 | 3.5 | 4.8 | ↓ | -1.3 | 4.5E-11 | 1.5E-07 |
| chr14:29643059-29643434 | 376  | 3.3 | 2.7 | 3.8 | ↓ | -1.1 | 1.4E-06 | 9.0E-04 |
| chr14:29992887-29993324 | 438  | 2.2 | 2.6 | 1.6 | ↑ | 1.1  | 2.6E-04 | 5.0E-02 |
| chr14:30233291-30233701 | 411  | 3.0 | 3.3 | 2.5 | ↑ | 0.8  | 5.9E-04 | 8.2E-02 |
| chr14:30337505-30338352 | 848  | 5.7 | 5.5 | 5.9 | ↓ | -0.5 | 1.7E-04 | 3.9E-02 |
| chr14:30556522-30557777 | 1256 | 6.8 | 6.6 | 7.0 | ↓ | -0.4 | 9.9E-07 | 6.9E-04 |
| chr14:30620099-30620589 | 491  | 4.6 | 4.4 | 4.8 | ↓ | -0.5 | 8.7E-05 | 2.4E-02 |
| chr14:30632325-30633143 | 819  | 3.8 | 3.4 | 4.1 | ↓ | -0.7 | 2.4E-05 | 8.8E-03 |
| chr14:31323331-31323952 | 622  | 3.6 | 3.2 | 3.9 | ↓ | -0.7 | 2.5E-04 | 4.9E-02 |
| chr14:31340861-31341984 | 1124 | 5.8 | 5.5 | 6.0 | ↓ | -0.5 | 8.2E-07 | 5.8E-04 |
| chr14:3263621-3264509   | 889  | 3.9 | 4.2 | 3.5 | ↑ | 0.8  | 5.9E-05 | 1.8E-02 |
| chr14:3264853-3266822   | 1970 | 6.6 | 6.7 | 6.5 | ↑ | 0.2  | 1.9E-04 | 4.2E-02 |
| chr14:35126700-35126937 | 238  | 1.4 | 1.9 | 0.6 | ↑ | 1.3  | 8.0E-04 | 9.9E-02 |
| chr14:35949466-35949785 | 320  | 2.8 | 2.2 | 3.2 | ↓ | -1.0 | 5.6E-04 | 7.9E-02 |
| chr14:36052231-36053302 | 1072 | 5.1 | 4.8 | 5.3 | ↓ | -0.5 | 6.6E-06 | 3.3E-03 |
| chr14:37067068-37067517 | 450  | 2.9 | 2.2 | 3.3 | ↓ | -1.1 | 7.1E-06 | 3.4E-03 |
| chr14:37067636-37068167 | 532  | 4.3 | 3.9 | 4.7 | ↓ | -0.8 | 3.0E-07 | 2.8E-04 |
| chr14:37105266-37105874 | 609  | 4.1 | 3.8 | 4.3 | ↓ | -0.6 | 4.5E-04 | 7.1E-02 |
| chr14:37143967-37144850 | 884  | 4.9 | 4.5 | 5.2 | ↓ | -0.8 | 5.1E-08 | 6.5E-05 |
| chr14:37207648-37208827 | 1180 | 5.0 | 4.7 | 5.2 | ↓ | -0.5 | 2.8E-04 | 5.2E-02 |
| chr14:37343273-37344840 | 1568 | 5.8 | 5.6 | 5.9 | ↓ | -0.3 | 7.9E-04 | 9.8E-02 |
| chr14:37652895-37653872 | 978  | 3.7 | 3.4 | 4.0 | ↓ | -0.6 | 1.4E-04 | 3.4E-02 |
| chr14:37692374-37692661 | 288  | 2.3 | 2.7 | 1.7 | ↑ | 1.0  | 5.3E-04 | 7.7E-02 |
| chr14:37715856-37716066 | 211  | 1.6 | 2.1 | 0.9 | ↑ | 1.2  | 6.3E-04 | 8.6E-02 |
| chr14:38233274-38233561 | 288  | 2.9 | 2.4 | 3.2 | ↓ | -0.8 | 5.6E-04 | 7.9E-02 |
| chr14:38588323-38590157 | 1835 | 5.1 | 4.8 | 5.3 | ↓ | -0.5 | 5.0E-06 | 2.6E-03 |
| chr14:38810625-38811000 | 376  | 4.0 | 3.7 | 4.3 | ↓ | -0.6 | 3.6E-04 | 6.2E-02 |
| chr14:39056387-39056831 | 445  | 3.6 | 3.3 | 3.9 | ↓ | -0.7 | 3.0E-04 | 5.4E-02 |
| chr14:39632141-39632413 | 273  | 2.7 | 2.1 | 3.1 | ↓ | -1.0 | 4.9E-05 | 1.6E-02 |
| chr14:39912155-39912954 | 800  | 4.0 | 3.6 | 4.3 | ↓ | -0.7 | 6.9E-05 | 2.0E-02 |
| chr14:40021871-40022802 | 932  | 5.6 | 5.3 | 5.9 | ↓ | -0.6 | 3.1E-07 | 2.8E-04 |
| chr14:40388754-40389305 | 552  | 3.4 | 2.8 | 3.8 | ↓ | -0.9 | 8.0E-07 | 5.8E-04 |
| chr14:40449502-40450014 | 513  | 3.6 | 3.1 | 4.0 | ↓ | -0.9 | 1.6E-06 | 9.9E-04 |
| chr14:40492621-40493164 | 544  | 3.1 | 2.4 | 3.5 | ↓ | -1.1 | 1.5E-06 | 9.6E-04 |
| chr14:40675673-40677014 | 1342 | 4.2 | 3.8 | 4.6 | ↓ | -0.8 | 6.8E-08 | 8.3E-05 |
| chr14:40894828-40895756 | 929  | 4.0 | 3.7 | 4.3 | ↓ | -0.6 | 2.7E-04 | 5.1E-02 |
| chr14:41105555-41106008 | 454  | 2.3 | 1.6 | 2.8 | ↓ | -1.2 | 2.4E-04 | 4.8E-02 |
| chr14:41583725-41584158 | 434  | 4.1 | 3.7 | 4.4 | ↓ | -0.7 | 8.0E-06 | 3.7E-03 |
| chr14:42686721-42687274 | 554  | 3.4 | 3.7 | 2.9 | ↑ | 0.8  | 5.0E-04 | 7.5E-02 |
| chr14:42736632-42737201 | 570  | 4.0 | 3.4 | 4.4 | ↓ | -1.0 | 1.9E-08 | 3.0E-05 |
| chr14:43019945-43020592 | 648  | 5.9 | 5.6 | 6.1 | ↓ | -0.5 | 1.5E-05 | 6.2E-03 |
| chr14:43022891-43023336 | 446  | 3.6 | 3.2 | 3.9 | ↓ | -0.7 | 4.6E-04 | 7.2E-02 |

|                         |      |     |     |     |   |      |         |         |
|-------------------------|------|-----|-----|-----|---|------|---------|---------|
| chr14:43049882-43050496 | 615  | 4.2 | 3.8 | 4.5 | ↓ | -0.6 | 4.1E-04 | 6.8E-02 |
| chr14:44336599-44337442 | 844  | 4.0 | 4.3 | 3.7 | ↑ | 0.6  | 4.8E-04 | 7.3E-02 |
| chr14:44414954-44415272 | 319  | 3.1 | 2.7 | 3.4 | ↓ | -0.7 | 6.4E-04 | 8.6E-02 |
| chr14:44785596-44785855 | 260  | 1.9 | 0.8 | 2.5 | ↓ | -1.7 | 4.9E-07 | 4.0E-04 |
| chr14:45786752-45787025 | 274  | 2.3 | 1.7 | 2.7 | ↓ | -1.0 | 5.1E-04 | 7.7E-02 |
| chr14:46390154-46390640 | 487  | 4.7 | 4.4 | 5.0 | ↓ | -0.6 | 3.1E-05 | 1.1E-02 |
| chr14:46484071-46484501 | 431  | 4.1 | 3.8 | 4.3 | ↓ | -0.5 | 7.0E-04 | 9.1E-02 |
| chr14:47476008-47478095 | 2088 | 5.9 | 5.6 | 6.1 | ↓ | -0.5 | 5.8E-08 | 7.2E-05 |
| chr14:475534-476177     | 644  | 3.6 | 3.3 | 3.9 | ↓ | -0.6 | 3.4E-04 | 5.9E-02 |
| chr14:47618664-47619048 | 385  | 2.8 | 2.3 | 3.2 | ↓ | -0.9 | 2.8E-04 | 5.2E-02 |
| chr14:47632448-47634290 | 1843 | 6.0 | 5.9 | 6.2 | ↓ | -0.3 | 7.1E-04 | 9.2E-02 |
| chr14:47635906-47636897 | 992  | 3.7 | 3.1 | 4.1 | ↓ | -1.0 | 5.4E-07 | 4.3E-04 |
| chr14:47637585-47639761 | 2177 | 6.0 | 5.6 | 6.3 | ↓ | -0.7 | 4.5E-10 | 1.1E-06 |
| chr14:47644670-47647381 | 2712 | 6.2 | 6.0 | 6.5 | ↓ | -0.5 | 2.7E-14 | 2.7E-10 |
| chr14:47986958-47989946 | 2989 | 8.0 | 7.7 | 8.3 | ↓ | -0.5 | 3.5E-12 | 1.5E-08 |
| chr14:47991496-47991937 | 442  | 3.6 | 2.8 | 4.1 | ↓ | -1.3 | 4.9E-12 | 1.8E-08 |
| chr14:49716863-49717697 | 835  | 5.8 | 6.0 | 5.6 | ↑ | 0.4  | 4.1E-06 | 2.3E-03 |
| chr14:50273300-50273819 | 520  | 3.1 | 2.6 | 3.5 | ↓ | -0.9 | 2.8E-05 | 1.0E-02 |
| chr14:50300587-50300811 | 225  | 1.7 | 2.2 | 1.0 | ↑ | 1.2  | 6.9E-04 | 9.1E-02 |
| chr14:50846765-50847982 | 1218 | 4.8 | 4.5 | 5.0 | ↓ | -0.5 | 6.5E-05 | 1.9E-02 |
| chr14:50884775-50885089 | 315  | 2.5 | 1.9 | 2.9 | ↓ | -1.0 | 2.3E-04 | 4.7E-02 |
| chr14:51176116-51176436 | 321  | 3.2 | 3.6 | 2.7 | ↑ | 0.9  | 2.0E-05 | 7.9E-03 |
| chr14:51188321-51189644 | 1324 | 5.6 | 5.3 | 5.9 | ↓ | -0.6 | 2.7E-07 | 2.6E-04 |
| chr14:52844565-52845457 | 893  | 4.3 | 4.0 | 4.5 | ↓ | -0.6 | 4.1E-05 | 1.3E-02 |
| chr14:52919221-52919602 | 382  | 2.5 | 1.9 | 2.9 | ↓ | -0.9 | 3.9E-04 | 6.5E-02 |
| chr14:53070613-53071540 | 928  | 4.9 | 5.1 | 4.6 | ↑ | 0.4  | 3.4E-04 | 5.9E-02 |
| chr14:53358528-53359204 | 677  | 4.2 | 3.9 | 4.5 | ↓ | -0.7 | 3.0E-05 | 1.0E-02 |
| chr14:5337972-5338394   | 423  | 3.3 | 2.9 | 3.6 | ↓ | -0.7 | 4.0E-04 | 6.6E-02 |
| chr14:53645436-53646475 | 1040 | 4.2 | 4.4 | 3.9 | ↑ | 0.5  | 7.6E-04 | 9.6E-02 |
| chr14:53844189-53845323 | 1135 | 5.1 | 5.2 | 4.9 | ↑ | 0.4  | 7.6E-04 | 9.6E-02 |
| chr14:54834145-54835000 | 856  | 5.3 | 5.0 | 5.6 | ↓ | -0.6 | 1.7E-07 | 1.7E-04 |
| chr14:54835497-54837667 | 2171 | 6.6 | 6.8 | 6.4 | ↑ | 0.5  | 6.5E-13 | 4.3E-09 |
| chr14:54883483-54884316 | 834  | 5.5 | 5.2 | 5.7 | ↓ | -0.6 | 9.8E-08 | 1.1E-04 |
| chr14:54925037-54927740 | 2704 | 6.7 | 6.9 | 6.5 | ↑ | 0.4  | 2.0E-04 | 4.3E-02 |
| chr14:54930601-54931169 | 569  | 2.8 | 2.1 | 3.3 | ↓ | -1.2 | 1.7E-06 | 1.0E-03 |
| chr14:54931194-54933446 | 2253 | 5.7 | 5.1 | 6.1 | ↓ | -1.0 | 7.5E-20 | 3.8E-15 |
| chr14:55151770-55153426 | 1657 | 6.6 | 6.4 | 6.8 | ↓ | -0.4 | 8.4E-08 | 9.7E-05 |
| chr14:55549453-55549749 | 297  | 2.9 | 3.2 | 2.4 | ↑ | 0.8  | 7.5E-04 | 9.6E-02 |
| chr14:55996217-55996924 | 708  | 3.5 | 3.8 | 3.0 | ↑ | 0.7  | 2.2E-04 | 4.5E-02 |
| chr14:56103250-56103419 | 170  | 1.6 | 2.1 | 0.8 | ↑ | 1.2  | 5.4E-04 | 7.9E-02 |
| chr14:56104321-56104576 | 256  | 1.9 | 2.5 | 1.0 | ↑ | 1.5  | 8.0E-06 | 3.7E-03 |
| chr14:57485673-57486463 | 791  | 4.7 | 4.2 | 5.1 | ↓ | -0.9 | 1.1E-07 | 1.1E-04 |
| chr14:58896323-58896726 | 404  | 2.2 | 2.7 | 1.6 | ↑ | 1.0  | 4.0E-04 | 6.6E-02 |
| chr14:59029347-59029573 | 227  | 1.5 | 2.0 | 0.7 | ↑ | 1.3  | 4.1E-04 | 6.8E-02 |
| chr14:59687658-59687911 | 254  | 2.2 | 2.7 | 1.3 | ↑ | 1.4  | 6.2E-06 | 3.2E-03 |
| chr14:60367916-60368203 | 288  | 2.2 | 1.6 | 2.7 | ↓ | -1.1 | 1.3E-04 | 3.3E-02 |
| chr14:60470166-60471292 | 1127 | 5.1 | 4.8 | 5.3 | ↓ | -0.5 | 4.3E-06 | 2.4E-03 |

|                         |      |     |     |     |   |      |         |         |
|-------------------------|------|-----|-----|-----|---|------|---------|---------|
| chr14:60648635-60648958 | 324  | 2.9 | 2.3 | 3.3 | ↓ | -1.0 | 1.2E-05 | 5.0E-03 |
| chr14:60698475-60698937 | 463  | 2.9 | 2.4 | 3.3 | ↓ | -0.9 | 2.6E-04 | 5.0E-02 |
| chr14:60725305-60725545 | 241  | 1.5 | 2.0 | 0.5 | ↑ | 1.5  | 9.8E-05 | 2.6E-02 |
| chr14:60910444-60911005 | 562  | 2.6 | 3.0 | 2.0 | ↑ | 0.9  | 4.9E-04 | 7.5E-02 |
| chr14:60932165-60932862 | 698  | 3.6 | 3.9 | 3.3 | ↑ | 0.6  | 2.0E-04 | 4.2E-02 |
| chr14:61545787-61546071 | 285  | 2.0 | 1.3 | 2.5 | ↓ | -1.2 | 1.2E-04 | 2.9E-02 |
| chr14:62480932-62481993 | 1062 | 4.9 | 5.1 | 4.7 | ↑ | 0.4  | 1.5E-04 | 3.6E-02 |
| chr14:63368264-63368721 | 458  | 2.7 | 3.1 | 2.2 | ↑ | 0.9  | 3.6E-04 | 6.2E-02 |
| chr14:63929346-63930156 | 811  | 5.9 | 5.6 | 6.2 | ↓ | -0.5 | 4.0E-04 | 6.6E-02 |
| chr14:63998999-63999665 | 667  | 3.8 | 4.1 | 3.4 | ↑ | 0.7  | 6.2E-04 | 8.5E-02 |
| chr14:64072444-64072747 | 304  | 2.1 | 2.6 | 1.5 | ↑ | 1.0  | 5.8E-04 | 8.2E-02 |
| chr14:6413382-6413955   | 574  | 3.1 | 2.6 | 3.5 | ↓ | -0.9 | 7.2E-04 | 9.3E-02 |
| chr14:64268627-64269225 | 599  | 3.0 | 2.5 | 3.3 | ↓ | -0.8 | 4.7E-04 | 7.2E-02 |
| chr14:64398057-64398498 | 442  | 2.1 | 2.5 | 1.5 | ↑ | 1.0  | 7.7E-04 | 9.6E-02 |
| chr14:64540039-64540711 | 673  | 3.9 | 3.5 | 4.2 | ↓ | -0.6 | 2.0E-04 | 4.3E-02 |
| chr14:64868343-64868856 | 514  | 2.6 | 3.0 | 2.1 | ↑ | 1.0  | 2.5E-04 | 4.9E-02 |
| chr14:65399574-65401331 | 1758 | 5.6 | 5.4 | 5.7 | ↓ | -0.3 | 8.1E-04 | 9.9E-02 |
| chr14:65728036-65728452 | 417  | 2.5 | 1.9 | 3.0 | ↓ | -1.1 | 9.0E-05 | 2.4E-02 |
| chr14:66051598-66053385 | 1788 | 5.4 | 5.2 | 5.5 | ↓ | -0.3 | 3.8E-04 | 6.4E-02 |
| chr14:66469392-66469716 | 325  | 1.9 | 1.1 | 2.4 | ↓ | -1.3 | 4.3E-04 | 6.9E-02 |
| chr14:66729226-66729644 | 419  | 2.4 | 1.9 | 2.8 | ↓ | -1.0 | 5.3E-04 | 7.7E-02 |
| chr14:67760093-67760535 | 443  | 2.4 | 1.8 | 2.8 | ↓ | -1.1 | 2.6E-04 | 5.0E-02 |
| chr14:67781094-67781709 | 616  | 3.7 | 3.3 | 4.0 | ↓ | -0.7 | 3.3E-04 | 5.7E-02 |
| chr14:68136302-68137295 | 994  | 4.3 | 4.0 | 4.5 | ↓ | -0.5 | 6.0E-04 | 8.3E-02 |
| chr14:6842235-6842902   | 668  | 5.7 | 5.5 | 5.9 | ↓ | -0.5 | 2.8E-05 | 1.0E-02 |
| chr14:68670700-68670997 | 298  | 2.4 | 1.6 | 2.8 | ↓ | -1.2 | 2.3E-05 | 8.5E-03 |
| chr14:68684928-68685716 | 789  | 3.3 | 2.8 | 3.6 | ↓ | -0.8 | 2.2E-04 | 4.5E-02 |
| chr14:70338573-70338989 | 417  | 2.5 | 2.0 | 2.9 | ↓ | -0.9 | 5.8E-04 | 8.2E-02 |
| chr14:70837150-70837394 | 245  | 1.6 | 2.1 | 0.8 | ↑ | 1.3  | 4.3E-04 | 6.9E-02 |
| chr14:72429543-72430198 | 656  | 3.2 | 3.7 | 2.7 | ↑ | 1.0  | 1.9E-05 | 7.3E-03 |
| chr14:7282955-7283843   | 889  | 4.4 | 4.1 | 4.6 | ↓ | -0.5 | 7.8E-04 | 9.7E-02 |
| chr14:73815347-73815575 | 229  | 2.3 | 2.7 | 1.7 | ↑ | 1.0  | 5.6E-04 | 8.0E-02 |
| chr14:7417299-7418309   | 1011 | 4.8 | 4.6 | 5.1 | ↓ | -0.5 | 7.8E-06 | 3.6E-03 |
| chr14:77677881-77678307 | 427  | 3.8 | 3.5 | 4.1 | ↓ | -0.6 | 7.3E-04 | 9.4E-02 |
| chr14:78643414-78644066 | 653  | 3.6 | 3.9 | 3.1 | ↑ | 0.8  | 3.1E-05 | 1.1E-02 |
| chr14:78696996-78697339 | 344  | 3.7 | 4.1 | 3.3 | ↑ | 0.8  | 2.2E-05 | 8.3E-03 |
| chr14:78775350-78776322 | 973  | 4.4 | 4.0 | 4.7 | ↓ | -0.8 | 6.5E-07 | 4.9E-04 |
| chr14:78790015-78790550 | 536  | 3.5 | 3.1 | 3.8 | ↓ | -0.7 | 6.1E-04 | 8.4E-02 |
| chr14:78816073-78817062 | 990  | 5.2 | 5.4 | 4.9 | ↑ | 0.5  | 3.2E-04 | 5.6E-02 |
| chr14:78984410-78984573 | 164  | 1.8 | 2.3 | 1.2 | ↑ | 1.1  | 7.4E-04 | 9.5E-02 |
| chr14:79166427-79167357 | 931  | 5.3 | 5.5 | 5.1 | ↑ | 0.4  | 1.3E-04 | 3.2E-02 |
| chr14:79420149-79420622 | 474  | 2.7 | 2.0 | 3.1 | ↓ | -1.1 | 3.2E-05 | 1.1E-02 |
| chr14:79755187-79755810 | 624  | 3.6 | 3.1 | 4.1 | ↓ | -1.0 | 1.4E-08 | 2.4E-05 |
| chr14:79767156-79767558 | 403  | 3.2 | 2.6 | 3.6 | ↓ | -0.9 | 1.2E-05 | 5.3E-03 |
| chr14:79794589-79795418 | 830  | 5.2 | 5.0 | 5.4 | ↓ | -0.4 | 7.5E-05 | 2.1E-02 |
| chr14:80323525-80324093 | 569  | 3.3 | 2.8 | 3.6 | ↓ | -0.8 | 1.9E-04 | 4.1E-02 |
| chr14:80478642-80479234 | 593  | 3.9 | 3.6 | 4.2 | ↓ | -0.6 | 2.6E-04 | 5.0E-02 |



|                         |      |     |     |     |   |      |         |         |
|-------------------------|------|-----|-----|-----|---|------|---------|---------|
| chr14:80595096-80596036 | 941  | 5.6 | 5.4 | 5.8 | ↓ | -0.4 | 1.6E-04 | 3.8E-02 |
| chr14:80640251-80640588 | 338  | 2.0 | 1.2 | 2.5 | ↓ | -1.3 | 3.1E-05 | 1.1E-02 |
| chr14:81358610-81358966 | 357  | 2.3 | 2.7 | 1.7 | ↑ | 1.0  | 7.4E-04 | 9.5E-02 |
| chr14:82622276-82624172 | 1897 | 5.9 | 6.0 | 5.7 | ↑ | 0.3  | 3.2E-04 | 5.7E-02 |
| chr14:83236895-83237923 | 1029 | 5.2 | 4.9 | 5.4 | ↓ | -0.5 | 2.1E-04 | 4.4E-02 |
| chr14:83256490-83256738 | 249  | 1.8 | 1.0 | 2.3 | ↓ | -1.3 | 1.6E-04 | 3.7E-02 |
| chr14:83716365-83716990 | 626  | 3.7 | 4.0 | 3.3 | ↑ | 0.7  | 6.4E-05 | 1.9E-02 |
| chr14:83736186-83736454 | 269  | 2.5 | 2.9 | 1.9 | ↑ | 1.0  | 6.0E-04 | 8.3E-02 |
| chr14:83877794-83878252 | 459  | 2.6 | 3.0 | 2.1 | ↑ | 0.9  | 1.4E-04 | 3.4E-02 |
| chr14:84021860-84022746 | 887  | 5.2 | 5.5 | 4.9 | ↑ | 0.7  | 2.2E-05 | 8.4E-03 |
| chr14:84023037-84023436 | 400  | 2.1 | 2.6 | 1.5 | ↑ | 1.1  | 2.5E-04 | 4.9E-02 |
| chr14:84381031-84381701 | 671  | 5.4 | 5.1 | 5.6 | ↓ | -0.5 | 1.0E-06 | 7.0E-04 |
| chr14:84552943-84553606 | 664  | 3.9 | 4.2 | 3.6 | ↑ | 0.6  | 7.0E-04 | 9.1E-02 |
| chr14:84571651-84575081 | 3431 | 6.9 | 7.1 | 6.7 | ↑ | 0.4  | 6.7E-06 | 3.3E-03 |
| chr14:84577233-84579394 | 2162 | 5.5 | 5.7 | 5.4 | ↑ | 0.3  | 5.3E-04 | 7.7E-02 |
| chr14:84790214-84790834 | 621  | 3.6 | 3.1 | 3.9 | ↓ | -0.8 | 5.0E-05 | 1.6E-02 |
| chr14:85729878-85730275 | 398  | 2.0 | 2.5 | 1.4 | ↑ | 1.1  | 6.4E-04 | 8.6E-02 |
| chr14:86070210-86070618 | 409  | 4.1 | 4.3 | 3.7 | ↑ | 0.6  | 3.9E-04 | 6.6E-02 |
| chr14:86235063-86236115 | 1053 | 6.2 | 5.9 | 6.4 | ↓ | -0.5 | 1.1E-07 | 1.1E-04 |
| chr14:86345656-86346217 | 562  | 2.6 | 3.1 | 1.7 | ↑ | 1.4  | 5.3E-07 | 4.3E-04 |
| chr14:8696266-8697458   | 1193 | 5.3 | 5.1 | 5.5 | ↓ | -0.3 | 5.6E-04 | 8.0E-02 |
| chr14:87578972-87579696 | 725  | 4.1 | 4.4 | 3.8 | ↑ | 0.6  | 4.0E-04 | 6.6E-02 |
| chr14:87587060-87587514 | 455  | 2.9 | 3.3 | 2.4 | ↑ | 1.0  | 1.0E-04 | 2.7E-02 |
| chr14:8767328-8767729   | 402  | 3.7 | 3.2 | 4.0 | ↓ | -0.7 | 6.6E-04 | 8.8E-02 |
| chr14:87767228-87767808 | 581  | 4.8 | 4.5 | 5.1 | ↓ | -0.6 | 7.3E-06 | 3.4E-03 |
| chr14:87945735-87946568 | 834  | 3.4 | 3.0 | 3.8 | ↓ | -0.8 | 4.8E-05 | 1.5E-02 |
| chr14:88119697-88120853 | 1157 | 4.8 | 4.6 | 5.1 | ↓ | -0.4 | 1.4E-04 | 3.5E-02 |
| chr14:88132000-88132728 | 729  | 3.7 | 4.0 | 3.3 | ↑ | 0.6  | 3.9E-04 | 6.6E-02 |
| chr14:881935-883082     | 1148 | 4.2 | 4.5 | 3.9 | ↑ | 0.6  | 6.6E-05 | 1.9E-02 |
| chr14:8821922-8822582   | 661  | 4.8 | 4.6 | 5.0 | ↓ | -0.4 | 7.2E-04 | 9.3E-02 |
| chr14:8958978-8959292   | 315  | 2.4 | 1.8 | 2.8 | ↓ | -1.0 | 5.9E-04 | 8.2E-02 |
| chr14:89863187-89863433 | 247  | 2.0 | 1.2 | 2.5 | ↓ | -1.3 | 2.4E-04 | 4.9E-02 |
| chr14:91280698-91281005 | 308  | 2.8 | 2.3 | 3.3 | ↓ | -1.0 | 3.9E-05 | 1.3E-02 |
| chr14:91705313-91705679 | 367  | 2.6 | 3.0 | 1.9 | ↑ | 1.1  | 5.6E-04 | 8.0E-02 |
| chr14:92401104-92401358 | 255  | 2.3 | 1.5 | 2.8 | ↓ | -1.2 | 1.5E-05 | 6.2E-03 |
| chr14:92592593-92593460 | 868  | 5.7 | 5.4 | 5.9 | ↓ | -0.5 | 1.1E-10 | 3.4E-07 |
| chr14:92765004-92765223 | 220  | 1.8 | 1.1 | 2.3 | ↓ | -1.3 | 1.6E-04 | 3.7E-02 |
| chr14:92874340-92874686 | 347  | 2.7 | 2.2 | 3.1 | ↓ | -0.9 | 6.0E-04 | 8.3E-02 |
| chr14:92920549-92920927 | 379  | 2.8 | 2.3 | 3.1 | ↓ | -0.8 | 6.7E-04 | 8.8E-02 |
| chr14:93025417-93026028 | 612  | 4.0 | 3.5 | 4.3 | ↓ | -0.8 | 6.4E-04 | 8.6E-02 |
| chr14:93158717-93159157 | 441  | 2.6 | 2.0 | 3.0 | ↓ | -1.0 | 3.0E-04 | 5.5E-02 |
| chr14:93323021-93323324 | 304  | 2.7 | 2.0 | 3.2 | ↓ | -1.2 | 4.8E-06 | 2.6E-03 |
| chr14:93500545-93501346 | 802  | 4.5 | 4.8 | 4.2 | ↑ | 0.6  | 1.5E-04 | 3.6E-02 |
| chr14:93501788-93502518 | 731  | 4.6 | 4.9 | 4.1 | ↑ | 0.8  | 3.2E-05 | 1.1E-02 |
| chr14:93516188-93516578 | 391  | 2.4 | 2.8 | 1.8 | ↑ | 1.0  | 2.5E-04 | 4.9E-02 |
| chr14:93542240-93542627 | 388  | 1.9 | 2.5 | 1.0 | ↑ | 1.5  | 1.1E-05 | 4.8E-03 |
| chr14:93545441-93545930 | 490  | 2.6 | 3.0 | 2.0 | ↑ | 1.0  | 7.6E-05 | 2.1E-02 |

|                           |      |     |     |     |   |      |         |         |
|---------------------------|------|-----|-----|-----|---|------|---------|---------|
| chr14:93560107-93561475   | 1369 | 4.9 | 5.2 | 4.6 | ↑ | 0.7  | 1.7E-07 | 1.7E-04 |
| chr14:93586008-93589044   | 3037 | 6.0 | 6.2 | 5.7 | ↑ | 0.5  | 6.6E-10 | 1.5E-06 |
| chr14:93818900-93819249   | 350  | 3.4 | 3.7 | 3.0 | ↑ | 0.8  | 8.9E-05 | 2.4E-02 |
| chr14:93859859-93860719   | 861  | 4.5 | 4.7 | 4.2 | ↑ | 0.5  | 2.3E-04 | 4.7E-02 |
| chr14:93900690-93901841   | 1152 | 4.8 | 5.1 | 4.5 | ↑ | 0.6  | 1.9E-04 | 4.2E-02 |
| chr14:93902129-93902875   | 747  | 3.9 | 4.2 | 3.5 | ↑ | 0.6  | 8.4E-05 | 2.3E-02 |
| chr14:94046456-94046897   | 442  | 2.4 | 2.8 | 1.9 | ↑ | 0.9  | 5.1E-04 | 7.7E-02 |
| chr14:94091685-94092027   | 343  | 2.3 | 1.6 | 2.8 | ↓ | -1.2 | 1.6E-05 | 6.6E-03 |
| chr14:94992801-94993488   | 688  | 2.9 | 2.3 | 3.2 | ↓ | -0.9 | 5.3E-04 | 7.7E-02 |
| chr14:9522401-9523018     | 618  | 4.6 | 4.8 | 4.2 | ↑ | 0.6  | 5.8E-05 | 1.7E-02 |
| chr14:95610331-95610836   | 506  | 3.0 | 3.4 | 2.6 | ↑ | 0.8  | 4.3E-04 | 6.9E-02 |
| chr14:96182163-96182656   | 494  | 3.9 | 4.5 | 2.9 | ↑ | 1.7  | 7.5E-14 | 6.4E-10 |
| chr14:96231126-96232189   | 1064 | 3.6 | 3.9 | 3.2 | ↑ | 0.7  | 1.9E-04 | 4.2E-02 |
| chr14:96258819-96259332   | 514  | 3.2 | 3.5 | 2.7 | ↑ | 0.9  | 4.3E-04 | 6.9E-02 |
| chr14:96359568-96360512   | 945  | 4.8 | 4.3 | 5.2 | ↓ | -0.9 | 3.0E-09 | 5.9E-06 |
| chr14:97421682-97422289   | 608  | 3.6 | 3.9 | 3.2 | ↑ | 0.7  | 4.5E-04 | 7.1E-02 |
| chr14:97430691-97432286   | 1596 | 5.5 | 5.7 | 5.3 | ↑ | 0.4  | 9.8E-05 | 2.6E-02 |
| chr14:97811994-97812279   | 286  | 2.0 | 1.4 | 2.5 | ↓ | -1.1 | 3.5E-04 | 6.1E-02 |
| chr14:98572577-98572862   | 286  | 2.4 | 1.7 | 2.9 | ↓ | -1.2 | 1.6E-05 | 6.6E-03 |
| chr14:98590778-98591197   | 420  | 2.5 | 1.8 | 2.9 | ↓ | -1.1 | 8.6E-05 | 2.4E-02 |
| chr14:98597665-98599887   | 2223 | 6.0 | 5.7 | 6.1 | ↓ | -0.4 | 5.6E-07 | 4.3E-04 |
| chr14:98601592-98601846   | 255  | 2.2 | 1.6 | 2.7 | ↓ | -1.0 | 3.2E-04 | 5.6E-02 |
| chr14:98662190-98662875   | 686  | 3.6 | 4.0 | 3.1 | ↑ | 0.9  | 6.8E-06 | 3.3E-03 |
| chr14:99764256-99764490   | 235  | 1.7 | 2.2 | 1.0 | ↑ | 1.2  | 5.2E-04 | 7.7E-02 |
| chr14:99874697-99875183   | 487  | 4.0 | 3.5 | 4.3 | ↓ | -0.9 | 1.6E-05 | 6.4E-03 |
| chr14:99877019-99878261   | 1243 | 4.1 | 4.5 | 3.6 | ↑ | 1.0  | 1.3E-06 | 8.5E-04 |
| chr15:10073710-10074274   | 565  | 3.7 | 3.2 | 4.1 | ↓ | -1.0 | 1.5E-07 | 1.1E-04 |
| chr15:102319165-102319661 | 497  | 3.8 | 3.4 | 4.0 | ↓ | -0.6 | 2.8E-04 | 5.4E-02 |
| chr15:102329736-102330274 | 539  | 3.2 | 2.8 | 3.5 | ↓ | -0.7 | 6.2E-04 | 9.1E-02 |
| chr15:103515052-103515579 | 528  | 4.3 | 4.0 | 4.5 | ↓ | -0.5 | 3.1E-04 | 5.7E-02 |
| chr15:103554249-103555259 | 1011 | 3.8 | 3.5 | 4.1 | ↓ | -0.7 | 6.7E-04 | 9.6E-02 |
| chr15:103705338-103706178 | 841  | 4.9 | 4.4 | 5.2 | ↓ | -0.8 | 1.3E-07 | 9.7E-05 |
| chr15:104105673-104105998 | 326  | 2.2 | 1.3 | 2.7 | ↓ | -1.4 | 3.5E-05 | 1.1E-02 |
| chr15:107094853-107095282 | 430  | 3.3 | 2.8 | 3.7 | ↓ | -0.8 | 2.5E-04 | 5.0E-02 |
| chr15:107152251-107152585 | 335  | 2.0 | 2.5 | 1.2 | ↑ | 1.4  | 2.4E-05 | 7.7E-03 |
| chr15:107648053-107648839 | 787  | 3.8 | 3.5 | 4.1 | ↓ | -0.7 | 5.1E-04 | 7.9E-02 |
| chr15:108387405-108387826 | 422  | 2.8 | 3.2 | 2.2 | ↑ | 1.1  | 2.3E-05 | 7.7E-03 |
| chr15:109000152-109000467 | 316  | 1.9 | 2.3 | 1.2 | ↑ | 1.2  | 3.6E-04 | 6.2E-02 |
| chr15:111113683-111114000 | 318  | 1.9 | 1.2 | 2.4 | ↓ | -1.2 | 2.8E-04 | 5.4E-02 |
| chr15:112092821-112093367 | 547  | 3.9 | 3.5 | 4.2 | ↓ | -0.7 | 1.2E-05 | 4.7E-03 |
| chr15:113149522-113150070 | 549  | 4.1 | 3.6 | 4.4 | ↓ | -0.8 | 1.2E-07 | 8.7E-05 |
| chr15:1133880-1134429     | 550  | 3.8 | 3.5 | 4.1 | ↓ | -0.7 | 8.1E-05 | 2.1E-02 |
| chr15:115184264-115187121 | 2858 | 6.2 | 5.9 | 6.4 | ↓ | -0.5 | 4.1E-09 | 4.5E-06 |
| chr15:117026233-117027307 | 1075 | 4.0 | 3.5 | 4.3 | ↓ | -0.8 | 6.0E-05 | 1.7E-02 |
| chr15:118303363-118303821 | 459  | 2.7 | 1.9 | 3.2 | ↓ | -1.2 | 1.2E-06 | 6.4E-04 |
| chr15:118384220-118387034 | 2815 | 6.2 | 5.7 | 6.5 | ↓ | -0.8 | 3.2E-09 | 3.8E-06 |
| chr15:118387193-118388236 | 1044 | 4.7 | 4.4 | 5.0 | ↓ | -0.6 | 3.9E-07 | 2.5E-04 |

|                           |      |     |     |     |   |      |         |         |
|---------------------------|------|-----|-----|-----|---|------|---------|---------|
| chr15:118388245-118388620 | 376  | 2.7 | 1.9 | 3.1 | ↓ | -1.2 | 1.5E-06 | 8.0E-04 |
| chr15:118389759-118390032 | 274  | 2.0 | 1.3 | 2.4 | ↓ | -1.1 | 5.7E-04 | 8.5E-02 |
| chr15:118391714-118393839 | 2126 | 5.3 | 5.0 | 5.6 | ↓ | -0.6 | 1.1E-05 | 4.4E-03 |
| chr15:118782096-118782839 | 744  | 2.5 | 3.0 | 2.0 | ↑ | 1.0  | 1.5E-04 | 3.5E-02 |
| chr15:118868108-118868704 | 597  | 3.4 | 2.9 | 3.8 | ↓ | -0.9 | 2.2E-04 | 4.6E-02 |
| chr15:121738759-121739423 | 665  | 3.3 | 2.9 | 3.6 | ↓ | -0.7 | 4.6E-04 | 7.5E-02 |
| chr15:122610923-122611792 | 870  | 3.8 | 3.4 | 4.1 | ↓ | -0.7 | 2.3E-05 | 7.7E-03 |
| chr15:122611808-122612210 | 403  | 2.6 | 1.6 | 3.1 | ↓ | -1.5 | 2.0E-08 | 1.9E-05 |
| chr15:122613299-122613919 | 621  | 2.8 | 2.1 | 3.2 | ↓ | -1.1 | 2.2E-05 | 7.6E-03 |
| chr15:122614992-122615351 | 360  | 2.4 | 1.8 | 2.8 | ↓ | -1.1 | 1.1E-04 | 2.7E-02 |
| chr15:122634927-122635480 | 554  | 3.2 | 2.6 | 3.5 | ↓ | -0.9 | 1.9E-04 | 4.1E-02 |
| chr15:123293758-123294173 | 416  | 3.3 | 2.4 | 3.8 | ↓ | -1.4 | 2.9E-10 | 3.8E-07 |
| chr15:123609452-123610160 | 709  | 3.1 | 2.7 | 3.4 | ↓ | -0.8 | 6.6E-04 | 9.5E-02 |
| chr15:124803435-124803987 | 553  | 3.1 | 2.6 | 3.4 | ↓ | -0.8 | 4.1E-04 | 6.9E-02 |
| chr15:126535854-126536104 | 251  | 2.1 | 2.6 | 1.4 | ↑ | 1.2  | 4.6E-04 | 7.5E-02 |
| chr15:130466581-130467017 | 437  | 3.1 | 2.6 | 3.4 | ↓ | -0.9 | 8.1E-05 | 2.1E-02 |
| chr15:134237288-134237662 | 375  | 2.2 | 1.5 | 2.6 | ↓ | -1.1 | 4.0E-04 | 6.8E-02 |
| chr15:134610521-134611933 | 1413 | 5.3 | 5.5 | 5.0 | ↑ | 0.6  | 4.2E-05 | 1.3E-02 |
| chr15:134615606-134620338 | 4733 | 7.6 | 7.7 | 7.5 | ↑ | 0.2  | 3.7E-06 | 1.7E-03 |
| chr15:134679075-134681675 | 2601 | 6.6 | 6.7 | 6.4 | ↑ | 0.3  | 1.4E-06 | 7.4E-04 |
| chr15:136028578-136029448 | 871  | 3.9 | 3.5 | 4.2 | ↓ | -0.6 | 9.5E-05 | 2.4E-02 |
| chr15:136404091-136405998 | 1908 | 4.8 | 4.6 | 5.1 | ↓ | -0.5 | 1.1E-04 | 2.7E-02 |
| chr15:136775738-136776178 | 441  | 3.4 | 3.6 | 3.0 | ↑ | 0.7  | 4.3E-04 | 7.1E-02 |
| chr15:138579349-138580616 | 1268 | 4.9 | 4.3 | 5.3 | ↓ | -1.0 | 2.4E-10 | 3.4E-07 |
| chr15:138588412-138588899 | 488  | 3.0 | 3.3 | 2.5 | ↑ | 0.8  | 4.8E-04 | 7.7E-02 |
| chr15:139152603-139152944 | 342  | 3.6 | 3.2 | 3.9 | ↓ | -0.8 | 3.1E-04 | 5.7E-02 |
| chr15:139407160-139407938 | 779  | 4.3 | 4.0 | 4.5 | ↓ | -0.5 | 3.7E-04 | 6.3E-02 |
| chr15:139804524-139804905 | 382  | 3.0 | 2.5 | 3.4 | ↓ | -0.9 | 1.2E-04 | 2.8E-02 |
| chr15:140342478-140342857 | 380  | 2.5 | 1.8 | 2.9 | ↓ | -1.0 | 8.4E-05 | 2.2E-02 |
| chr15:141655385-141655885 | 501  | 2.6 | 3.0 | 2.0 | ↑ | 1.0  | 5.8E-04 | 8.6E-02 |
| chr15:142092776-142093239 | 464  | 2.6 | 2.0 | 3.0 | ↓ | -1.0 | 2.2E-04 | 4.6E-02 |
| chr15:142122819-142123563 | 745  | 3.5 | 3.1 | 3.9 | ↓ | -0.8 | 3.3E-04 | 5.9E-02 |
| chr15:144875902-144876312 | 411  | 2.5 | 3.0 | 1.9 | ↑ | 1.2  | 1.7E-05 | 6.5E-03 |
| chr15:145631442-145632848 | 1407 | 5.3 | 4.9 | 5.6 | ↓ | -0.7 | 2.7E-08 | 2.4E-05 |
| chr15:146036871-146037953 | 1083 | 5.6 | 5.4 | 5.8 | ↓ | -0.4 | 5.1E-05 | 1.5E-02 |
| chr15:146527414-146529046 | 1633 | 6.0 | 5.6 | 6.2 | ↓ | -0.6 | 6.8E-07 | 4.0E-04 |
| chr15:147478414-147480885 | 2472 | 7.0 | 7.1 | 6.8 | ↑ | 0.2  | 5.0E-05 | 1.5E-02 |
| chr15:148869671-148870522 | 852  | 4.4 | 3.9 | 4.8 | ↓ | -0.9 | 1.8E-06 | 9.0E-04 |
| chr15:149822905-149824803 | 1899 | 5.6 | 5.4 | 5.8 | ↓ | -0.4 | 2.6E-04 | 5.2E-02 |
| chr15:149843013-149850197 | 7185 | 7.6 | 7.5 | 7.8 | ↓ | -0.3 | 2.3E-06 | 1.1E-03 |
| chr15:150420616-150420882 | 267  | 1.8 | 2.3 | 1.0 | ↑ | 1.3  | 2.1E-04 | 4.4E-02 |
| chr15:150497843-150499098 | 1256 | 4.8 | 4.5 | 5.1 | ↓ | -0.6 | 2.2E-04 | 4.6E-02 |
| chr15:150537341-150537693 | 353  | 2.8 | 2.3 | 3.1 | ↓ | -0.8 | 5.0E-04 | 7.9E-02 |
| chr15:150777023-150780066 | 3044 | 6.8 | 6.7 | 6.9 | ↓ | -0.2 | 6.0E-05 | 1.7E-02 |
| chr15:151021855-151022416 | 562  | 3.3 | 2.5 | 3.8 | ↓ | -1.3 | 7.4E-09 | 7.7E-06 |
| chr15:151362606-151363648 | 1043 | 3.9 | 4.2 | 3.6 | ↑ | 0.6  | 5.8E-04 | 8.7E-02 |
| chr15:151462986-151464294 | 1309 | 5.9 | 5.7 | 6.0 | ↓ | -0.4 | 1.1E-04 | 2.7E-02 |

|                           |      |     |     |     |   |      |         |         |
|---------------------------|------|-----|-----|-----|---|------|---------|---------|
| chr15:151520165-151521548 | 1384 | 4.6 | 4.4 | 4.9 | ↓ | -0.5 | 3.4E-05 | 1.0E-02 |
| chr15:151941672-151942652 | 981  | 4.3 | 4.5 | 4.0 | ↑ | 0.5  | 5.2E-04 | 8.1E-02 |
| chr15:152121112-152122355 | 1244 | 6.2 | 6.1 | 6.3 | ↓ | -0.3 | 4.4E-04 | 7.3E-02 |
| chr15:152577876-152578355 | 480  | 2.5 | 1.9 | 2.9 | ↓ | -1.0 | 6.3E-04 | 9.2E-02 |
| chr15:152584095-152585137 | 1043 | 4.5 | 4.7 | 4.2 | ↑ | 0.5  | 4.1E-04 | 6.9E-02 |
| chr15:152796415-152800997 | 4583 | 7.7 | 7.6 | 7.8 | ↓ | -0.2 | 2.6E-04 | 5.2E-02 |
| chr15:153364965-153365562 | 598  | 4.7 | 3.8 | 5.2 | ↓ | -1.4 | 5.9E-13 | 1.1E-09 |
| chr15:153719411-153719817 | 407  | 1.9 | 1.2 | 2.3 | ↓ | -1.2 | 4.7E-04 | 7.6E-02 |
| chr15:153721664-153723794 | 2131 | 5.4 | 5.2 | 5.6 | ↓ | -0.4 | 5.0E-04 | 7.9E-02 |
| chr15:154233948-154236860 | 2913 | 6.5 | 6.3 | 6.6 | ↓ | -0.3 | 1.6E-06 | 8.2E-04 |
| chr15:155205319-155212140 | 6822 | 9.0 | 8.9 | 9.0 | ↓ | -0.1 | 4.7E-04 | 7.5E-02 |
| chr15:155451202-155457529 | 6328 | 9.6 | 9.5 | 9.6 | ↓ | -0.1 | 1.7E-05 | 6.6E-03 |
| chr15:155588123-155591880 | 3758 | 7.3 | 7.2 | 7.4 | ↓ | -0.2 | 5.0E-04 | 7.9E-02 |
| chr15:156827771-156828405 | 635  | 3.1 | 2.3 | 3.6 | ↓ | -1.3 | 3.2E-07 | 2.1E-04 |
| chr15:17796990-17797276   | 287  | 2.4 | 1.8 | 2.8 | ↓ | -1.0 | 2.1E-04 | 4.4E-02 |
| chr15:1814859-1815206     | 348  | 2.1 | 1.4 | 2.5 | ↓ | -1.2 | 1.9E-04 | 4.1E-02 |
| chr15:18767141-18767578   | 438  | 2.6 | 2.0 | 3.1 | ↓ | -1.1 | 7.1E-05 | 1.9E-02 |
| chr15:20511318-20512204   | 887  | 3.7 | 3.2 | 4.1 | ↓ | -1.0 | 2.4E-06 | 1.1E-03 |
| chr15:20741638-20742100   | 463  | 3.8 | 2.8 | 4.4 | ↓ | -1.6 | 2.1E-12 | 3.5E-09 |
| chr15:20742248-20742888   | 641  | 3.4 | 2.6 | 3.8 | ↓ | -1.2 | 9.6E-09 | 9.4E-06 |
| chr15:20784550-20785164   | 615  | 3.2 | 2.8 | 3.5 | ↓ | -0.7 | 5.5E-04 | 8.4E-02 |
| chr15:20834415-20835366   | 952  | 4.3 | 3.9 | 4.6 | ↓ | -0.6 | 2.1E-05 | 7.5E-03 |
| chr15:21048949-21049364   | 416  | 2.3 | 1.6 | 2.7 | ↓ | -1.1 | 1.5E-04 | 3.5E-02 |
| chr15:22098868-22099776   | 909  | 2.9 | 3.5 | 1.9 | ↑ | 1.6  | 4.2E-07 | 2.6E-04 |
| chr15:22845724-22846136   | 413  | 2.6 | 2.1 | 3.0 | ↓ | -0.9 | 5.7E-04 | 8.6E-02 |
| chr15:2486040-2486386     | 347  | 2.5 | 2.9 | 1.9 | ↑ | 1.0  | 4.0E-04 | 6.8E-02 |
| chr15:25329562-25330039   | 478  | 3.0 | 3.4 | 2.6 | ↑ | 0.8  | 5.5E-04 | 8.4E-02 |
| chr15:2684875-2686095     | 1221 | 4.4 | 4.7 | 4.1 | ↑ | 0.6  | 5.2E-05 | 1.5E-02 |
| chr15:27035646-27036042   | 397  | 2.7 | 2.2 | 3.1 | ↓ | -0.9 | 3.5E-04 | 6.1E-02 |
| chr15:27036475-27036841   | 367  | 2.6 | 2.0 | 3.0 | ↓ | -1.0 | 9.9E-05 | 2.5E-02 |
| chr15:27312986-27313446   | 461  | 2.9 | 2.3 | 3.3 | ↓ | -1.0 | 2.3E-05 | 7.7E-03 |
| chr15:28279304-28279940   | 637  | 3.0 | 2.5 | 3.3 | ↓ | -0.8 | 5.5E-04 | 8.4E-02 |
| chr15:31213679-31214042   | 364  | 2.1 | 1.5 | 2.6 | ↓ | -1.1 | 3.3E-04 | 5.9E-02 |
| chr15:32034568-32035163   | 596  | 3.3 | 2.7 | 3.7 | ↓ | -1.0 | 1.3E-04 | 2.9E-02 |
| chr15:32035862-32037198   | 1337 | 4.9 | 4.5 | 5.2 | ↓ | -0.6 | 3.2E-07 | 2.1E-04 |
| chr15:32038242-32040721   | 2480 | 6.4 | 6.3 | 6.6 | ↓ | -0.3 | 5.2E-04 | 8.1E-02 |
| chr15:32041729-32042131   | 403  | 1.9 | 1.1 | 2.4 | ↓ | -1.3 | 6.3E-05 | 1.7E-02 |
| chr15:34399873-34400556   | 684  | 4.0 | 3.6 | 4.3 | ↓ | -0.6 | 1.2E-04 | 2.9E-02 |
| chr15:35610448-35610900   | 453  | 2.7 | 2.1 | 3.1 | ↓ | -1.0 | 1.6E-04 | 3.7E-02 |
| chr15:36892764-36895570   | 2807 | 6.6 | 6.4 | 6.7 | ↓ | -0.3 | 5.9E-05 | 1.7E-02 |
| chr15:37060197-37060855   | 659  | 4.4 | 3.9 | 4.7 | ↓ | -0.9 | 1.1E-05 | 4.4E-03 |
| chr15:37091745-37092801   | 1057 | 4.5 | 4.2 | 4.8 | ↓ | -0.7 | 2.6E-04 | 5.2E-02 |
| chr15:38047782-38048770   | 989  | 3.8 | 3.3 | 4.1 | ↓ | -0.9 | 2.2E-05 | 7.6E-03 |
| chr15:38049046-38051268   | 2223 | 7.1 | 7.3 | 7.0 | ↑ | 0.3  | 2.4E-05 | 7.7E-03 |
| chr15:39593265-39593692   | 428  | 2.6 | 2.1 | 3.0 | ↓ | -0.9 | 1.9E-04 | 4.1E-02 |
| chr15:42406741-42407263   | 523  | 5.1 | 4.8 | 5.3 | ↓ | -0.6 | 2.2E-05 | 7.6E-03 |
| chr15:42649637-42651685   | 2049 | 5.1 | 4.8 | 5.3 | ↓ | -0.5 | 7.1E-05 | 1.9E-02 |

|                         |      |     |     |     |   |      |         |         |
|-------------------------|------|-----|-----|-----|---|------|---------|---------|
| chr15:43355632-43356149 | 518  | 3.0 | 3.4 | 2.4 | ↑ | 1.0  | 7.4E-05 | 2.0E-02 |
| chr15:44061535-44062580 | 1046 | 4.5 | 4.8 | 4.2 | ↑ | 0.6  | 6.0E-04 | 8.9E-02 |
| chr15:44521651-44522033 | 383  | 2.1 | 2.7 | 1.2 | ↑ | 1.5  | 3.1E-06 | 1.4E-03 |
| chr15:489556-489870     | 315  | 2.5 | 1.8 | 3.0 | ↓ | -1.1 | 6.9E-05 | 1.9E-02 |
| chr15:49844932-49846060 | 1129 | 4.7 | 4.3 | 5.0 | ↓ | -0.7 | 4.7E-06 | 2.1E-03 |
| chr15:50389035-50389396 | 362  | 2.6 | 3.0 | 1.9 | ↑ | 1.1  | 2.2E-05 | 7.6E-03 |
| chr15:50389519-50389929 | 411  | 2.3 | 2.8 | 1.5 | ↑ | 1.3  | 6.5E-06 | 2.8E-03 |
| chr15:50518343-50519142 | 800  | 3.0 | 3.5 | 2.2 | ↑ | 1.3  | 5.9E-08 | 4.8E-05 |
| chr15:50519747-50521209 | 1463 | 5.0 | 5.4 | 4.4 | ↑ | 1.1  | 1.7E-08 | 1.6E-05 |
| chr15:50591952-50592913 | 962  | 3.7 | 3.3 | 4.0 | ↓ | -0.7 | 1.9E-04 | 4.1E-02 |
| chr15:51322055-51322638 | 584  | 2.8 | 3.1 | 2.3 | ↑ | 0.8  | 6.2E-04 | 9.1E-02 |
| chr15:51986323-51987027 | 705  | 2.8 | 3.2 | 2.4 | ↑ | 0.8  | 6.7E-04 | 9.6E-02 |
| chr15:52679046-52679306 | 261  | 2.7 | 2.2 | 3.1 | ↓ | -0.9 | 6.4E-04 | 9.3E-02 |
| chr15:52915254-52915760 | 507  | 2.9 | 3.3 | 2.4 | ↑ | 0.9  | 3.5E-04 | 6.1E-02 |
| chr15:53329672-53330640 | 969  | 3.3 | 2.8 | 3.6 | ↓ | -0.9 | 9.5E-05 | 2.4E-02 |
| chr15:53584078-53584818 | 741  | 3.5 | 2.8 | 4.0 | ↓ | -1.2 | 1.7E-10 | 2.5E-07 |
| chr15:54616661-54617776 | 1116 | 3.8 | 3.1 | 4.3 | ↓ | -1.2 | 3.8E-08 | 3.2E-05 |
| chr15:54618694-54619139 | 446  | 2.3 | 1.4 | 2.8 | ↓ | -1.4 | 6.9E-07 | 4.0E-04 |
| chr15:54621207-54621741 | 535  | 2.7 | 2.1 | 3.1 | ↓ | -0.9 | 2.6E-04 | 5.2E-02 |
| chr15:54626608-54627139 | 532  | 2.8 | 1.1 | 3.6 | ↓ | -2.5 | 5.4E-19 | 2.1E-15 |
| chr15:54630719-54632494 | 1776 | 5.1 | 4.7 | 5.4 | ↓ | -0.7 | 2.4E-07 | 1.7E-04 |
| chr15:54633339-54638033 | 4695 | 7.0 | 6.0 | 7.5 | ↓ | -1.5 | 1.7E-26 | 1.3E-22 |
| chr15:54642272-54642852 | 581  | 2.7 | 1.2 | 3.4 | ↓ | -2.2 | 5.4E-15 | 1.2E-11 |
| chr15:54672443-54672927 | 485  | 2.7 | 2.0 | 3.2 | ↓ | -1.3 | 2.3E-06 | 1.1E-03 |
| chr15:54855472-54856568 | 1097 | 4.3 | 4.0 | 4.6 | ↓ | -0.6 | 3.4E-04 | 6.1E-02 |
| chr15:54910903-54912239 | 1337 | 6.3 | 5.9 | 6.5 | ↓ | -0.6 | 3.2E-08 | 2.8E-05 |
| chr15:55482454-55483096 | 643  | 2.7 | 2.0 | 3.2 | ↓ | -1.2 | 9.2E-07 | 5.2E-04 |
| chr15:55736223-55736948 | 726  | 3.7 | 3.3 | 3.9 | ↓ | -0.6 | 3.1E-04 | 5.7E-02 |
| chr15:55809415-55811991 | 2577 | 6.9 | 6.6 | 7.1 | ↓ | -0.5 | 1.1E-09 | 1.4E-06 |
| chr15:55814330-55816217 | 1888 | 5.5 | 5.6 | 5.3 | ↑ | 0.3  | 1.3E-04 | 2.9E-02 |
| chr15:56055183-56055795 | 613  | 4.1 | 3.8 | 4.4 | ↓ | -0.6 | 3.1E-05 | 9.8E-03 |
| chr15:56193050-56193691 | 642  | 4.0 | 3.6 | 4.3 | ↓ | -0.7 | 2.1E-05 | 7.5E-03 |
| chr15:56228137-56228945 | 809  | 3.9 | 3.5 | 4.2 | ↓ | -0.7 | 2.5E-04 | 5.0E-02 |
| chr15:57706349-57707218 | 870  | 3.9 | 3.5 | 4.2 | ↓ | -0.6 | 2.9E-04 | 5.6E-02 |
| chr15:59415818-59416306 | 489  | 4.6 | 4.1 | 4.9 | ↓ | -0.8 | 5.2E-08 | 4.3E-05 |
| chr15:60012450-60013003 | 554  | 3.5 | 2.8 | 3.9 | ↓ | -1.1 | 2.7E-07 | 1.9E-04 |
| chr15:62521495-62522212 | 718  | 3.6 | 3.9 | 3.2 | ↑ | 0.7  | 8.6E-05 | 2.2E-02 |
| chr15:6515198-6517217   | 2020 | 5.4 | 5.2 | 5.6 | ↓ | -0.4 | 1.8E-04 | 4.0E-02 |
| chr15:65446418-65448698 | 2281 | 6.0 | 6.2 | 5.7 | ↑ | 0.4  | 3.6E-04 | 6.2E-02 |
| chr15:66896131-66896848 | 718  | 3.9 | 3.6 | 4.2 | ↓ | -0.6 | 4.0E-04 | 6.8E-02 |
| chr15:66900954-66901225 | 272  | 1.9 | 1.0 | 2.5 | ↓ | -1.4 | 2.0E-05 | 7.5E-03 |
| chr15:66904524-66904856 | 333  | 2.2 | 2.6 | 1.5 | ↑ | 1.1  | 3.5E-04 | 6.1E-02 |
| chr15:7072675-7073122   | 448  | 2.9 | 2.2 | 3.3 | ↓ | -1.1 | 1.6E-06 | 8.2E-04 |
| chr15:71693402-71694355 | 954  | 3.6 | 3.0 | 4.0 | ↓ | -1.0 | 1.0E-05 | 4.4E-03 |
| chr15:71694382-71695366 | 985  | 5.1 | 4.5 | 5.5 | ↓ | -1.1 | 3.0E-21 | 1.3E-17 |
| chr15:71695447-71696214 | 768  | 3.8 | 3.2 | 4.1 | ↓ | -0.9 | 1.7E-05 | 6.6E-03 |
| chr15:71698767-71700483 | 1717 | 4.6 | 4.0 | 5.0 | ↓ | -1.0 | 1.2E-12 | 2.1E-09 |

|                         |      |     |     |     |   |      |         |         |
|-------------------------|------|-----|-----|-----|---|------|---------|---------|
| chr15:71700879-71701753 | 875  | 4.5 | 3.7 | 5.0 | ↓ | -1.3 | 3.9E-11 | 5.9E-08 |
| chr15:71749231-71750632 | 1402 | 5.5 | 5.2 | 5.7 | ↓ | -0.5 | 2.1E-04 | 4.4E-02 |
| chr15:71769767-71770284 | 518  | 3.6 | 2.9 | 4.1 | ↓ | -1.2 | 1.8E-05 | 6.6E-03 |
| chr15:71784865-71785391 | 527  | 3.3 | 2.9 | 3.7 | ↓ | -0.8 | 2.2E-04 | 4.6E-02 |
| chr15:71820181-71820678 | 498  | 3.5 | 3.1 | 3.9 | ↓ | -0.8 | 3.2E-05 | 9.9E-03 |
| chr15:71821354-71821783 | 430  | 2.0 | 0.9 | 2.6 | ↓ | -1.7 | 5.7E-07 | 3.4E-04 |
| chr15:71825675-71826477 | 803  | 3.7 | 3.3 | 4.0 | ↓ | -0.7 | 1.6E-04 | 3.6E-02 |
| chr15:73052478-73053090 | 613  | 3.6 | 3.9 | 3.3 | ↑ | 0.6  | 7.0E-04 | 9.9E-02 |
| chr15:73953666-73954209 | 544  | 3.3 | 3.7 | 2.9 | ↑ | 0.7  | 6.8E-04 | 9.7E-02 |
| chr15:74195097-74195593 | 497  | 3.8 | 3.5 | 4.1 | ↓ | -0.6 | 1.6E-04 | 3.6E-02 |
| chr15:74623373-74624007 | 635  | 3.3 | 3.7 | 2.8 | ↑ | 0.8  | 6.8E-05 | 1.9E-02 |
| chr15:79747502-79748063 | 562  | 2.9 | 2.2 | 3.4 | ↓ | -1.2 | 6.8E-08 | 5.3E-05 |
| chr15:84711586-84712572 | 987  | 4.8 | 4.5 | 5.0 | ↓ | -0.5 | 4.4E-04 | 7.3E-02 |
| chr15:86393336-86394106 | 771  | 3.3 | 2.7 | 3.8 | ↓ | -1.0 | 2.4E-07 | 1.7E-04 |
| chr15:86678115-86678644 | 530  | 3.0 | 2.4 | 3.4 | ↓ | -1.0 | 1.4E-05 | 5.4E-03 |
| chr15:86719245-86719586 | 342  | 2.6 | 2.0 | 3.1 | ↓ | -1.0 | 3.2E-04 | 5.8E-02 |
| chr15:88997841-88998921 | 1081 | 4.1 | 3.8 | 4.4 | ↓ | -0.6 | 2.7E-05 | 8.7E-03 |
| chr15:89002932-89003386 | 455  | 3.4 | 3.0 | 3.8 | ↓ | -0.7 | 1.2E-04 | 2.9E-02 |
| chr15:89789852-89790292 | 441  | 3.2 | 2.6 | 3.5 | ↓ | -0.9 | 1.0E-04 | 2.5E-02 |
| chr15:89924648-89925092 | 445  | 2.7 | 2.1 | 3.1 | ↓ | -0.9 | 3.4E-04 | 6.1E-02 |
| chr15:90022065-90023919 | 1855 | 5.4 | 4.9 | 5.8 | ↓ | -1.0 | 4.1E-09 | 4.5E-06 |
| chr15:90025530-90026749 | 1220 | 4.6 | 4.0 | 5.0 | ↓ | -1.0 | 1.5E-06 | 7.8E-04 |
| chr15:90028355-90028893 | 539  | 3.5 | 2.9 | 3.9 | ↓ | -0.9 | 2.4E-05 | 7.7E-03 |
| chr15:91356348-91356735 | 388  | 2.4 | 1.5 | 2.9 | ↓ | -1.5 | 1.8E-06 | 9.0E-04 |
| chr15:91369015-91369433 | 419  | 2.6 | 2.0 | 3.0 | ↓ | -0.9 | 5.4E-04 | 8.3E-02 |
| chr15:91377308-91378073 | 766  | 3.7 | 2.9 | 4.2 | ↓ | -1.3 | 3.5E-10 | 4.5E-07 |
| chr15:91392209-91393390 | 1182 | 4.1 | 2.8 | 4.8 | ↓ | -1.9 | 3.3E-26 | 1.7E-22 |
| chr15:91393905-91394559 | 655  | 3.3 | 2.6 | 3.8 | ↓ | -1.2 | 8.6E-09 | 8.7E-06 |
| chr15:91396125-91397757 | 1633 | 5.0 | 3.9 | 5.7 | ↓ | -1.7 | 1.5E-14 | 3.1E-11 |
| chr15:91402925-91403280 | 356  | 2.3 | 1.7 | 2.7 | ↓ | -1.0 | 3.1E-04 | 5.7E-02 |
| chr15:91407889-91408912 | 1024 | 3.9 | 2.6 | 4.5 | ↓ | -1.9 | 1.7E-16 | 5.0E-13 |
| chr15:91415665-91417285 | 1621 | 5.7 | 4.4 | 6.4 | ↓ | -2.1 | 1.7E-32 | 2.6E-28 |
| chr15:91418147-91418787 | 641  | 3.1 | 2.6 | 3.5 | ↓ | -0.9 | 2.8E-05 | 8.8E-03 |
| chr15:91419540-91421853 | 2314 | 5.6 | 4.1 | 6.3 | ↓ | -2.2 | 6.7E-28 | 6.9E-24 |
| chr15:91423044-91423706 | 663  | 3.8 | 2.9 | 4.3 | ↓ | -1.4 | 3.3E-11 | 5.3E-08 |
| chr15:91425236-91427259 | 2024 | 5.0 | 3.7 | 5.7 | ↓ | -2.0 | 1.5E-36 | 4.4E-32 |
| chr15:91427408-91428894 | 1487 | 5.2 | 4.0 | 5.9 | ↓ | -1.8 | 3.7E-16 | 9.5E-13 |
| chr15:91428908-91430392 | 1485 | 5.2 | 4.0 | 5.8 | ↓ | -1.9 | 3.3E-26 | 1.7E-22 |
| chr15:91430932-91432101 | 1170 | 4.7 | 3.6 | 5.3 | ↓ | -1.7 | 1.8E-16 | 5.0E-13 |
| chr15:91433788-91434591 | 804  | 4.4 | 3.4 | 4.9 | ↓ | -1.5 | 4.5E-18 | 1.5E-14 |
| chr15:91439147-91441300 | 2154 | 5.6 | 5.2 | 5.9 | ↓ | -0.6 | 5.4E-06 | 2.3E-03 |
| chr15:91444515-91445236 | 722  | 3.8 | 2.7 | 4.4 | ↓ | -1.6 | 8.9E-16 | 2.1E-12 |
| chr15:91447031-91447425 | 395  | 1.8 | 0.8 | 2.4 | ↓ | -1.6 | 3.8E-06 | 1.7E-03 |
| chr15:91456171-91456765 | 595  | 3.3 | 2.6 | 3.7 | ↓ | -1.2 | 2.3E-05 | 7.7E-03 |
| chr15:91571052-91571383 | 332  | 2.8 | 2.3 | 3.1 | ↓ | -0.8 | 3.7E-04 | 6.4E-02 |
| chr15:91743710-91744492 | 783  | 3.7 | 3.2 | 4.0 | ↓ | -0.8 | 1.6E-05 | 6.1E-03 |
| chr15:91874096-91874747 | 652  | 3.2 | 2.7 | 3.5 | ↓ | -0.8 | 2.0E-04 | 4.4E-02 |

|                         |      |     |     |     |   |      |         |         |
|-------------------------|------|-----|-----|-----|---|------|---------|---------|
| chr15:91889390-91890127 | 738  | 3.7 | 3.3 | 4.0 | ↓ | -0.7 | 5.3E-05 | 1.5E-02 |
| chr15:92013455-92014169 | 715  | 4.2 | 3.8 | 4.5 | ↓ | -0.7 | 2.8E-04 | 5.4E-02 |
| chr15:93046721-93047005 | 285  | 2.5 | 1.9 | 3.0 | ↓ | -1.1 | 2.4E-04 | 4.9E-02 |
| chr15:93413217-93413731 | 515  | 3.6 | 4.0 | 3.2 | ↑ | 0.8  | 3.1E-04 | 5.7E-02 |
| chr15:96200803-96201390 | 588  | 3.5 | 2.9 | 3.9 | ↓ | -1.0 | 4.3E-07 | 2.6E-04 |
| chr15:96836677-96837173 | 497  | 3.4 | 2.9 | 3.7 | ↓ | -0.8 | 2.9E-04 | 5.5E-02 |
| chr16:18623958-18624295 | 338  | 2.0 | 2.4 | 1.4 | ↑ | 1.1  | 8.2E-04 | 7.5E-02 |
| chr16:18705558-18705870 | 313  | 2.1 | 2.5 | 1.3 | ↑ | 1.2  | 1.3E-04 | 2.1E-02 |
| chr16:18764431-18764668 | 238  | 1.8 | 2.2 | 1.1 | ↑ | 1.1  | 1.1E-03 | 8.6E-02 |
| chr16:18780447-18781573 | 1127 | 5.5 | 5.3 | 5.7 | ↓ | -0.4 | 9.4E-04 | 8.1E-02 |
| chr16:18796629-18797271 | 643  | 4.2 | 4.4 | 3.9 | ↑ | 0.5  | 5.7E-04 | 6.1E-02 |
| chr16:18809179-18811284 | 2106 | 6.0 | 6.1 | 5.9 | ↑ | 0.3  | 8.5E-04 | 7.6E-02 |
| chr16:18869907-18870340 | 434  | 2.5 | 1.8 | 3.0 | ↓ | -1.2 | 2.7E-05 | 5.8E-03 |
| chr16:18896302-18897687 | 1386 | 5.4 | 5.1 | 5.6 | ↓ | -0.5 | 1.9E-06 | 6.1E-04 |
| chr16:20163153-20163801 | 649  | 3.2 | 2.7 | 3.6 | ↓ | -0.9 | 1.2E-05 | 3.0E-03 |
| chr16:20521192-20521510 | 319  | 2.7 | 2.2 | 3.1 | ↓ | -1.0 | 6.5E-04 | 6.5E-02 |
| chr16:20656854-20657199 | 346  | 2.4 | 1.7 | 2.9 | ↓ | -1.1 | 5.3E-05 | 1.0E-02 |
| chr16:21031067-21031470 | 404  | 2.1 | 2.5 | 1.4 | ↑ | 1.1  | 2.5E-04 | 3.5E-02 |
| chr16:21065798-21066156 | 359  | 3.0 | 2.5 | 3.3 | ↓ | -0.8 | 6.4E-04 | 6.4E-02 |
| chr16:21474474-21474959 | 486  | 3.3 | 2.9 | 3.6 | ↓ | -0.7 | 3.5E-04 | 4.3E-02 |
| chr16:21614737-21615336 | 600  | 2.8 | 3.2 | 2.3 | ↑ | 0.8  | 4.5E-04 | 5.2E-02 |
| chr16:21794170-21794758 | 589  | 3.4 | 3.0 | 3.7 | ↓ | -0.7 | 8.8E-04 | 7.8E-02 |
| chr16:23671816-23672129 | 314  | 1.9 | 2.4 | 1.1 | ↑ | 1.3  | 2.7E-04 | 3.7E-02 |
| chr16:23697789-23698167 | 379  | 2.6 | 2.0 | 3.0 | ↓ | -1.0 | 3.1E-04 | 3.9E-02 |
| chr16:24664114-24664603 | 490  | 2.6 | 2.0 | 3.0 | ↓ | -1.1 | 3.3E-05 | 6.9E-03 |
| chr16:24680563-24681647 | 1085 | 4.8 | 4.5 | 5.1 | ↓ | -0.7 | 6.1E-05 | 1.2E-02 |
| chr16:25057012-25058381 | 1370 | 5.5 | 5.7 | 5.3 | ↑ | 0.4  | 8.2E-04 | 7.5E-02 |
| chr16:25302648-25303287 | 640  | 3.7 | 3.3 | 4.0 | ↓ | -0.7 | 4.2E-04 | 4.9E-02 |
| chr16:25509735-25510041 | 307  | 2.7 | 2.2 | 3.1 | ↓ | -0.9 | 8.8E-04 | 7.8E-02 |
| chr16:26052538-26053219 | 682  | 3.6 | 3.0 | 4.0 | ↓ | -1.0 | 2.7E-07 | 1.3E-04 |
| chr16:26409243-26409819 | 577  | 3.2 | 2.2 | 3.8 | ↓ | -1.6 | 1.4E-09 | 1.1E-06 |
| chr16:26446628-26446900 | 273  | 2.6 | 2.0 | 3.1 | ↓ | -1.0 | 8.9E-05 | 1.6E-02 |
| chr16:26463062-26463630 | 569  | 3.3 | 2.9 | 3.7 | ↓ | -0.8 | 1.2E-04 | 2.0E-02 |
| chr16:26489578-26490068 | 491  | 2.6 | 2.0 | 3.0 | ↓ | -1.0 | 2.3E-04 | 3.3E-02 |
| chr16:26504758-26505224 | 467  | 3.7 | 3.0 | 4.2 | ↓ | -1.1 | 3.5E-11 | 4.1E-08 |
| chr16:26512261-26513810 | 1550 | 4.4 | 4.1 | 4.7 | ↓ | -0.6 | 9.5E-05 | 1.7E-02 |
| chr16:26516894-26517180 | 287  | 2.5 | 1.8 | 3.0 | ↓ | -1.2 | 1.9E-05 | 4.6E-03 |
| chr16:26517523-26517998 | 476  | 2.6 | 1.7 | 3.1 | ↓ | -1.4 | 7.9E-08 | 4.5E-05 |
| chr16:26533370-26533830 | 461  | 2.8 | 2.3 | 3.1 | ↓ | -0.8 | 6.0E-04 | 6.3E-02 |
| chr16:26540507-26540833 | 327  | 3.0 | 2.4 | 3.5 | ↓ | -1.1 | 2.5E-05 | 5.5E-03 |
| chr16:26652961-26653587 | 627  | 5.2 | 4.9 | 5.5 | ↓ | -0.6 | 1.8E-07 | 9.3E-05 |
| chr16:26654310-26654678 | 369  | 2.1 | 1.4 | 2.6 | ↓ | -1.2 | 2.6E-04 | 3.6E-02 |
| chr16:26659759-26660016 | 258  | 2.2 | 1.4 | 2.7 | ↓ | -1.3 | 7.5E-06 | 2.0E-03 |
| chr16:26697041-26697614 | 574  | 3.6 | 2.9 | 4.1 | ↓ | -1.2 | 1.4E-08 | 9.9E-06 |
| chr16:26699543-26700137 | 595  | 4.0 | 3.7 | 4.3 | ↓ | -0.6 | 6.8E-04 | 6.7E-02 |
| chr16:26740330-26741057 | 728  | 3.3 | 2.9 | 3.6 | ↓ | -0.7 | 1.1E-03 | 8.6E-02 |
| chr16:26744463-26745153 | 691  | 2.8 | 2.4 | 3.1 | ↓ | -0.8 | 1.1E-03 | 8.8E-02 |

|                         |      |      |      |      |   |      |         |         |
|-------------------------|------|------|------|------|---|------|---------|---------|
| chr16:28728797-28729401 | 605  | 2.4  | 2.8  | 1.8  | ↑ | 1.0  | 1.4E-04 | 2.2E-02 |
| chr16:29283827-29284909 | 1083 | 3.8  | 3.2  | 4.2  | ↓ | -1.0 | 5.0E-07 | 2.1E-04 |
| chr16:29289461-29290205 | 745  | 3.9  | 3.6  | 4.2  | ↓ | -0.7 | 7.4E-04 | 7.1E-02 |
| chr16:29518279-29518986 | 708  | 3.6  | 3.2  | 3.9  | ↓ | -0.7 | 7.3E-04 | 7.1E-02 |
| chr16:30315482-30316298 | 817  | 3.8  | 3.4  | 4.2  | ↓ | -0.8 | 3.9E-05 | 8.1E-03 |
| chr16:30936401-30937237 | 837  | 3.9  | 3.4  | 4.3  | ↓ | -0.9 | 1.7E-06 | 5.7E-04 |
| chr16:31729858-31730339 | 482  | 2.4  | 2.8  | 1.8  | ↑ | 0.9  | 1.3E-03 | 9.9E-02 |
| chr16:32150526-32150947 | 422  | 2.7  | 3.3  | 1.8  | ↑ | 1.5  | 5.7E-08 | 3.4E-05 |
| chr16:32542237-32542746 | 510  | 2.3  | 3.0  | 0.9  | ↑ | 2.1  | 9.3E-11 | 9.3E-08 |
| chr16:32546654-32547462 | 809  | 4.1  | 4.8  | 2.5  | ↑ | 2.3  | 2.6E-35 | 5.6E-31 |
| chr16:32552406-32553611 | 1206 | 4.9  | 5.5  | 3.9  | ↑ | 1.6  | 6.5E-25 | 4.6E-21 |
| chr16:32563250-32563601 | 352  | 2.8  | 3.5  | 1.6  | ↑ | 1.9  | 2.1E-11 | 2.8E-08 |
| chr16:32563879-32565177 | 1299 | 3.4  | 4.0  | 2.4  | ↑ | 1.7  | 1.0E-13 | 2.1E-10 |
| chr16:33130186-33130541 | 356  | 2.5  | 1.8  | 3.0  | ↓ | -1.1 | 1.1E-04 | 1.9E-02 |
| chr16:33836186-33836546 | 361  | 2.7  | 2.2  | 3.1  | ↓ | -0.9 | 4.5E-04 | 5.2E-02 |
| chr16:34224396-34225424 | 1029 | 4.3  | 4.5  | 4.0  | ↑ | 0.5  | 1.0E-03 | 8.4E-02 |
| chr16:34623974-34624585 | 612  | 4.0  | 4.3  | 3.6  | ↑ | 0.7  | 6.3E-04 | 6.4E-02 |
| chr16:35441935-35442287 | 353  | 2.1  | 1.4  | 2.6  | ↓ | -1.2 | 4.6E-05 | 9.1E-03 |
| chr16:36040135-36040499 | 365  | 3.4  | 3.0  | 3.8  | ↓ | -0.8 | 1.8E-05 | 4.4E-03 |
| chr16:36433725-36434634 | 910  | 4.8  | 4.3  | 5.1  | ↓ | -0.8 | 2.7E-08 | 1.7E-05 |
| chr16:36509500-36510142 | 643  | 3.4  | 3.7  | 3.0  | ↑ | 0.6  | 1.2E-03 | 9.8E-02 |
| chr16:36780579-36787741 | 7163 | 16.9 | 16.8 | 16.9 | ↓ | -0.1 | 2.6E-06 | 8.3E-04 |
| chr16:37210003-37210407 | 405  | 3.0  | 1.9  | 3.6  | ↓ | -1.7 | 5.2E-13 | 9.2E-10 |
| chr16:37210892-37211380 | 489  | 3.6  | 3.1  | 3.9  | ↓ | -0.8 | 2.7E-06 | 8.4E-04 |
| chr16:37213769-37214165 | 397  | 2.2  | 1.5  | 2.6  | ↓ | -1.1 | 3.9E-04 | 4.6E-02 |
| chr16:37223774-37225177 | 1404 | 5.2  | 4.5  | 5.7  | ↓ | -1.2 | 2.6E-18 | 1.4E-14 |
| chr16:37225320-37226135 | 816  | 5.0  | 4.1  | 5.5  | ↓ | -1.4 | 1.4E-12 | 2.3E-09 |
| chr16:37227239-37229096 | 1858 | 5.1  | 4.0  | 5.7  | ↓ | -1.7 | 7.8E-29 | 8.3E-25 |
| chr16:37229558-37230158 | 601  | 3.4  | 1.8  | 4.2  | ↓ | -2.4 | 1.1E-17 | 4.8E-14 |
| chr16:37230202-37230374 | 173  | 1.4  | 0.5  | 1.9  | ↓ | -1.4 | 2.6E-04 | 3.6E-02 |
| chr16:37230505-37230915 | 411  | 3.5  | 2.7  | 4.0  | ↓ | -1.2 | 3.4E-10 | 3.3E-07 |
| chr16:37232188-37232762 | 575  | 2.4  | 1.6  | 2.9  | ↓ | -1.4 | 8.3E-07 | 3.1E-04 |
| chr16:37232790-37234182 | 1393 | 4.1  | 3.0  | 4.7  | ↓ | -1.7 | 1.6E-17 | 5.6E-14 |
| chr16:37234208-37236731 | 2524 | 6.2  | 5.9  | 6.4  | ↓ | -0.5 | 4.0E-06 | 1.2E-03 |
| chr16:37237209-37238021 | 813  | 4.1  | 3.7  | 4.4  | ↓ | -0.6 | 4.7E-04 | 5.3E-02 |
| chr16:37239092-37239388 | 297  | 3.2  | 2.7  | 3.5  | ↓ | -0.8 | 6.8E-04 | 6.7E-02 |
| chr16:37264566-37265238 | 673  | 3.9  | 3.4  | 4.3  | ↓ | -0.9 | 1.4E-06 | 4.9E-04 |
| chr16:37266127-37266738 | 612  | 4.2  | 3.9  | 4.5  | ↓ | -0.5 | 2.6E-04 | 3.6E-02 |
| chr16:37436012-37436675 | 664  | 3.4  | 2.8  | 3.8  | ↓ | -1.1 | 2.2E-05 | 5.2E-03 |
| chr16:37756640-37757158 | 519  | 2.5  | 1.9  | 2.9  | ↓ | -1.1 | 1.3E-04 | 2.1E-02 |
| chr16:37771748-37772394 | 647  | 3.7  | 3.2  | 4.1  | ↓ | -0.9 | 8.1E-07 | 3.1E-04 |
| chr16:37773682-37774411 | 730  | 3.6  | 3.1  | 4.0  | ↓ | -0.9 | 8.9E-07 | 3.2E-04 |
| chr16:37784419-37784658 | 240  | 2.0  | 1.3  | 2.5  | ↓ | -1.2 | 2.4E-04 | 3.4E-02 |
| chr16:37916798-37917190 | 393  | 3.5  | 2.9  | 3.9  | ↓ | -1.0 | 4.4E-06 | 1.3E-03 |
| chr16:37920016-37921031 | 1016 | 4.1  | 3.8  | 4.3  | ↓ | -0.5 | 2.5E-04 | 3.5E-02 |
| chr16:37921327-37921876 | 550  | 3.4  | 3.0  | 3.7  | ↓ | -0.8 | 1.2E-04 | 2.0E-02 |
| chr16:38056947-38058027 | 1081 | 5.0  | 4.7  | 5.2  | ↓ | -0.6 | 5.0E-07 | 2.1E-04 |



|                         |      |     |     |     |   |      |         |         |
|-------------------------|------|-----|-----|-----|---|------|---------|---------|
| chr16:38111332-38111745 | 414  | 2.5 | 1.9 | 2.9 | ↓ | -1.0 | 6.1E-04 | 6.3E-02 |
| chr16:38747251-38748020 | 770  | 4.5 | 3.7 | 5.0 | ↓ | -1.3 | 2.2E-11 | 2.8E-08 |
| chr16:38807362-38808121 | 760  | 4.5 | 4.3 | 4.7 | ↓ | -0.4 | 8.0E-04 | 7.5E-02 |
| chr16:39017460-39017711 | 252  | 2.0 | 1.3 | 2.4 | ↓ | -1.2 | 3.7E-04 | 4.5E-02 |
| chr16:39018559-39019431 | 873  | 5.2 | 4.8 | 5.5 | ↓ | -0.7 | 2.0E-07 | 1.0E-04 |
| chr16:39081210-39081938 | 729  | 4.5 | 4.3 | 4.7 | ↓ | -0.4 | 9.6E-04 | 8.1E-02 |
| chr16:39209954-39210486 | 533  | 2.4 | 1.8 | 2.9 | ↓ | -1.1 | 1.9E-04 | 2.7E-02 |
| chr16:39212903-39213407 | 505  | 2.5 | 1.7 | 3.0 | ↓ | -1.3 | 2.9E-06 | 8.7E-04 |
| chr16:39463521-39463732 | 212  | 1.7 | 2.2 | 1.0 | ↑ | 1.2  | 5.6E-04 | 5.9E-02 |
| chr16:39661069-39661715 | 647  | 3.3 | 2.9 | 3.7 | ↓ | -0.8 | 2.3E-05 | 5.2E-03 |
| chr16:39661749-39662273 | 525  | 3.4 | 2.9 | 3.7 | ↓ | -0.8 | 2.8E-04 | 3.7E-02 |
| chr16:39663979-39665199 | 1221 | 4.2 | 3.7 | 4.5 | ↓ | -0.8 | 3.2E-07 | 1.5E-04 |
| chr16:39713017-39713655 | 639  | 3.2 | 2.7 | 3.6 | ↓ | -0.8 | 2.0E-04 | 3.0E-02 |
| chr16:39714368-39716754 | 2387 | 6.0 | 5.7 | 6.2 | ↓ | -0.5 | 4.5E-10 | 4.0E-07 |
| chr16:39723346-39724261 | 916  | 3.9 | 3.4 | 4.2 | ↓ | -0.8 | 1.5E-04 | 2.3E-02 |
| chr16:39726249-39726774 | 526  | 3.5 | 3.1 | 3.8 | ↓ | -0.7 | 9.0E-04 | 7.8E-02 |
| chr16:39730096-39730804 | 709  | 4.4 | 4.1 | 4.7 | ↓ | -0.6 | 8.1E-04 | 7.5E-02 |
| chr16:39758708-39758981 | 274  | 1.7 | 1.0 | 2.2 | ↓ | -1.1 | 1.0E-03 | 8.5E-02 |
| chr16:39763513-39763914 | 402  | 2.8 | 2.3 | 3.2 | ↓ | -0.9 | 3.0E-04 | 3.9E-02 |
| chr16:40961921-40962194 | 274  | 3.0 | 2.5 | 3.3 | ↓ | -0.9 | 7.5E-05 | 1.4E-02 |
| chr16:41104902-41105375 | 474  | 3.3 | 2.8 | 3.6 | ↓ | -0.8 | 1.6E-04 | 2.4E-02 |
| chr16:41195234-41195810 | 577  | 2.2 | 1.7 | 2.6 | ↓ | -1.0 | 5.8E-04 | 6.1E-02 |
| chr16:41293229-41293598 | 370  | 3.8 | 3.5 | 4.0 | ↓ | -0.6 | 5.1E-04 | 5.6E-02 |
| chr16:41293639-41294290 | 652  | 3.4 | 3.0 | 3.7 | ↓ | -0.7 | 5.2E-04 | 5.7E-02 |
| chr16:41317904-41318425 | 522  | 2.5 | 1.9 | 2.9 | ↓ | -0.9 | 8.1E-04 | 7.5E-02 |
| chr16:4150427-4151614   | 1188 | 4.3 | 4.0 | 4.6 | ↓ | -0.6 | 2.2E-05 | 5.2E-03 |
| chr16:42011484-42011983 | 500  | 2.6 | 3.0 | 2.0 | ↑ | 0.9  | 4.1E-04 | 4.9E-02 |
| chr16:42149252-42149604 | 353  | 2.2 | 1.7 | 2.7 | ↓ | -1.0 | 6.4E-04 | 6.4E-02 |
| chr16:42157730-42158157 | 428  | 3.2 | 2.3 | 3.8 | ↓ | -1.4 | 2.5E-07 | 1.2E-04 |
| chr16:42188997-42189730 | 734  | 3.7 | 3.3 | 4.1 | ↓ | -0.7 | 1.4E-04 | 2.1E-02 |
| chr16:42518079-42518504 | 426  | 1.9 | 2.5 | 0.9 | ↑ | 1.6  | 4.3E-06 | 1.3E-03 |
| chr16:4294704-4296274   | 1571 | 5.3 | 5.6 | 5.0 | ↑ | 0.6  | 1.9E-05 | 4.6E-03 |
| chr16:43197546-43198281 | 736  | 3.1 | 2.6 | 3.5 | ↓ | -0.9 | 1.2E-04 | 2.0E-02 |
| chr16:43201154-43201547 | 394  | 2.5 | 1.5 | 3.1 | ↓ | -1.6 | 1.2E-08 | 8.4E-06 |
| chr16:43201891-43202493 | 603  | 2.8 | 2.1 | 3.2 | ↓ | -1.1 | 2.6E-06 | 8.3E-04 |
| chr16:43202541-43204485 | 1945 | 5.3 | 4.7 | 5.7 | ↓ | -1.0 | 6.9E-10 | 5.8E-07 |
| chr16:43207818-43208066 | 249  | 1.8 | 1.1 | 2.3 | ↓ | -1.2 | 3.3E-04 | 4.1E-02 |
| chr16:4337716-4338412   | 697  | 3.3 | 2.8 | 3.7 | ↓ | -0.9 | 1.0E-04 | 1.8E-02 |
| chr16:43495660-43496292 | 633  | 2.9 | 3.3 | 2.4 | ↑ | 0.9  | 2.4E-04 | 3.4E-02 |
| chr16:44384390-44384692 | 303  | 2.6 | 3.0 | 2.1 | ↑ | 0.9  | 3.2E-04 | 4.0E-02 |
| chr16:4535707-4536968   | 1262 | 5.2 | 5.0 | 5.4 | ↓ | -0.4 | 8.7E-04 | 7.7E-02 |
| chr16:45940415-45940797 | 383  | 3.1 | 2.5 | 3.5 | ↓ | -1.0 | 2.8E-05 | 6.1E-03 |
| chr16:48243817-48244128 | 312  | 2.8 | 2.3 | 3.2 | ↓ | -0.9 | 2.0E-04 | 3.0E-02 |
| chr16:48458461-48458803 | 343  | 2.9 | 2.2 | 3.3 | ↓ | -1.1 | 1.1E-04 | 1.8E-02 |
| chr16:4874367-4874743   | 377  | 2.2 | 2.7 | 1.6 | ↑ | 1.1  | 1.7E-04 | 2.6E-02 |
| chr16:48968155-48968530 | 376  | 2.3 | 1.5 | 2.8 | ↓ | -1.4 | 5.2E-06 | 1.5E-03 |
| chr16:48974903-48975653 | 751  | 4.2 | 3.9 | 4.4 | ↓ | -0.5 | 1.1E-03 | 8.7E-02 |

|                         |      |     |     |     |   |      |         |         |
|-------------------------|------|-----|-----|-----|---|------|---------|---------|
| chr16:49894085-49894581 | 497  | 4.4 | 4.6 | 4.1 | ↑ | 0.5  | 1.1E-04 | 1.9E-02 |
| chr16:49897747-49898392 | 646  | 3.7 | 4.0 | 3.3 | ↑ | 0.7  | 3.1E-04 | 3.9E-02 |
| chr16:49986239-49987633 | 1395 | 4.0 | 4.3 | 3.7 | ↑ | 0.6  | 4.7E-04 | 5.3E-02 |
| chr16:50449485-50450063 | 579  | 2.5 | 2.8 | 1.9 | ↑ | 0.9  | 4.2E-04 | 4.9E-02 |
| chr16:50483973-50484376 | 404  | 2.5 | 2.0 | 2.9 | ↓ | -0.9 | 9.4E-04 | 8.1E-02 |
| chr16:50729427-50729932 | 506  | 3.8 | 3.4 | 4.1 | ↓ | -0.6 | 7.3E-04 | 7.1E-02 |
| chr16:51600864-51601417 | 554  | 3.3 | 2.8 | 3.7 | ↓ | -0.9 | 5.9E-06 | 1.6E-03 |
| chr16:52014208-52015052 | 845  | 4.3 | 4.0 | 4.5 | ↓ | -0.5 | 7.5E-04 | 7.2E-02 |
| chr16:52434895-52435853 | 959  | 3.8 | 4.1 | 3.5 | ↑ | 0.6  | 9.5E-04 | 8.1E-02 |
| chr16:5353282-5353776   | 495  | 2.7 | 3.1 | 2.2 | ↑ | 0.8  | 6.3E-04 | 6.4E-02 |
| chr16:54063348-54063629 | 282  | 2.9 | 2.3 | 3.2 | ↓ | -0.9 | 5.9E-04 | 6.2E-02 |
| chr16:54119862-54120591 | 730  | 3.0 | 2.6 | 3.3 | ↓ | -0.7 | 1.3E-03 | 9.9E-02 |
| chr16:54359674-54361283 | 1610 | 5.3 | 5.0 | 5.5 | ↓ | -0.5 | 6.0E-08 | 3.5E-05 |
| chr16:5436756-5437341   | 586  | 3.2 | 2.7 | 3.6 | ↓ | -0.9 | 7.1E-06 | 1.9E-03 |
| chr16:54478993-54479446 | 454  | 3.2 | 2.6 | 3.5 | ↓ | -0.9 | 4.0E-05 | 8.1E-03 |
| chr16:54522095-54523668 | 1574 | 5.8 | 5.6 | 6.0 | ↓ | -0.3 | 3.1E-04 | 3.9E-02 |
| chr16:55018983-55019830 | 848  | 4.5 | 4.2 | 4.8 | ↓ | -0.7 | 1.3E-04 | 2.1E-02 |
| chr16:55165578-55166314 | 737  | 4.9 | 4.7 | 5.1 | ↓ | -0.4 | 1.3E-03 | 9.9E-02 |
| chr16:55194821-55195695 | 875  | 4.0 | 3.7 | 4.2 | ↓ | -0.5 | 8.5E-04 | 7.6E-02 |
| chr16:55308501-55309214 | 714  | 3.2 | 3.5 | 2.8 | ↑ | 0.7  | 5.6E-04 | 5.9E-02 |
| chr16:55639055-55639509 | 455  | 3.2 | 2.8 | 3.6 | ↓ | -0.8 | 3.6E-04 | 4.3E-02 |
| chr16:56012252-56013081 | 830  | 3.7 | 4.0 | 3.4 | ↑ | 0.6  | 8.2E-04 | 7.5E-02 |
| chr16:56015390-56016052 | 663  | 3.3 | 3.6 | 2.9 | ↑ | 0.7  | 5.0E-04 | 5.6E-02 |
| chr16:56017396-56020208 | 2813 | 6.4 | 6.6 | 6.1 | ↑ | 0.4  | 3.8E-07 | 1.7E-04 |
| chr16:56027022-56028284 | 1263 | 5.3 | 5.5 | 5.1 | ↑ | 0.4  | 2.3E-05 | 5.3E-03 |
| chr16:56252101-56252571 | 471  | 2.2 | 1.6 | 2.6 | ↓ | -1.0 | 9.3E-04 | 8.1E-02 |
| chr16:56819936-56823336 | 3401 | 7.1 | 7.3 | 6.8 | ↑ | 0.4  | 2.9E-04 | 3.7E-02 |
| chr16:56942429-56944395 | 1967 | 5.7 | 5.8 | 5.5 | ↑ | 0.3  | 8.8E-04 | 7.8E-02 |
| chr16:57730558-57731510 | 953  | 4.1 | 3.8 | 4.3 | ↓ | -0.6 | 7.8E-04 | 7.4E-02 |
| chr16:57748561-57749043 | 483  | 3.2 | 2.8 | 3.5 | ↓ | -0.7 | 7.4E-04 | 7.1E-02 |
| chr16:57763640-57764239 | 600  | 2.9 | 2.4 | 3.2 | ↓ | -0.8 | 1.2E-03 | 9.6E-02 |
| chr16:57770092-57771104 | 1013 | 5.6 | 5.7 | 5.4 | ↑ | 0.4  | 5.3E-05 | 1.0E-02 |
| chr16:58029185-58029900 | 716  | 2.8 | 3.3 | 2.2 | ↑ | 1.1  | 2.6E-05 | 5.7E-03 |
| chr16:58220862-58222014 | 1153 | 4.2 | 3.9 | 4.5 | ↓ | -0.6 | 9.6E-04 | 8.1E-02 |
| chr16:58344600-58344972 | 373  | 2.2 | 2.7 | 1.6 | ↑ | 1.1  | 2.7E-04 | 3.6E-02 |
| chr16:59008963-59009590 | 628  | 3.7 | 4.0 | 3.4 | ↑ | 0.7  | 4.7E-04 | 5.3E-02 |
| chr16:59233296-59235454 | 2159 | 6.2 | 6.1 | 6.3 | ↓ | -0.2 | 7.6E-04 | 7.2E-02 |
| chr16:59276010-59276615 | 606  | 2.9 | 2.4 | 3.3 | ↓ | -0.9 | 3.9E-05 | 8.1E-03 |
| chr16:59423869-59427454 | 3586 | 7.2 | 7.1 | 7.3 | ↓ | -0.2 | 4.2E-04 | 4.9E-02 |
| chr16:59428865-59429377 | 513  | 3.6 | 3.1 | 4.0 | ↓ | -0.9 | 6.8E-07 | 2.7E-04 |
| chr16:59440444-59441565 | 1122 | 5.1 | 4.8 | 5.4 | ↓ | -0.6 | 1.3E-04 | 2.0E-02 |
| chr16:59475586-59477519 | 1934 | 6.7 | 6.5 | 6.9 | ↓ | -0.4 | 6.7E-06 | 1.8E-03 |
| chr16:60346232-60346857 | 626  | 3.8 | 3.3 | 4.2 | ↓ | -0.9 | 4.3E-06 | 1.3E-03 |
| chr16:60434448-60435131 | 684  | 3.0 | 2.5 | 3.3 | ↓ | -0.8 | 6.4E-04 | 6.4E-02 |
| chr16:61840564-61840836 | 273  | 1.9 | 1.1 | 2.4 | ↓ | -1.3 | 1.3E-04 | 2.1E-02 |
| chr16:61983857-61984368 | 512  | 3.9 | 3.5 | 4.2 | ↓ | -0.7 | 6.9E-05 | 1.3E-02 |
| chr16:62002258-62002699 | 442  | 2.3 | 1.5 | 2.8 | ↓ | -1.3 | 7.6E-06 | 2.0E-03 |

|                         |      |     |     |     |   |      |         |         |
|-------------------------|------|-----|-----|-----|---|------|---------|---------|
| chr16:62047154-62047525 | 372  | 2.9 | 1.7 | 3.6 | ↓ | -1.8 | 9.7E-14 | 2.1E-10 |
| chr16:6219927-6221018   | 1092 | 4.6 | 4.1 | 4.9 | ↓ | -0.8 | 1.6E-09 | 1.2E-06 |
| chr16:62201711-62202122 | 412  | 2.0 | 2.4 | 1.3 | ↑ | 1.1  | 9.9E-04 | 8.3E-02 |
| chr16:6254315-6254720   | 406  | 3.0 | 3.3 | 2.6 | ↑ | 0.7  | 1.2E-03 | 9.4E-02 |
| chr16:62951122-62951542 | 421  | 5.1 | 4.9 | 5.3 | ↓ | -0.4 | 6.5E-04 | 6.5E-02 |
| chr16:64611184-64611461 | 278  | 2.8 | 3.2 | 2.4 | ↑ | 0.8  | 1.1E-03 | 8.6E-02 |
| chr16:6499572-6500072   | 501  | 4.4 | 3.8 | 4.7 | ↓ | -0.9 | 6.8E-06 | 1.8E-03 |
| chr16:65452926-65453408 | 483  | 4.3 | 3.7 | 4.7 | ↓ | -1.0 | 1.8E-12 | 2.7E-09 |
| chr16:65635573-65636040 | 468  | 3.1 | 2.4 | 3.6 | ↓ | -1.2 | 1.3E-07 | 7.2E-05 |
| chr16:65636170-65636557 | 388  | 2.0 | 1.3 | 2.5 | ↓ | -1.2 | 1.7E-04 | 2.6E-02 |
| chr16:66197397-66197680 | 284  | 1.6 | 0.9 | 2.1 | ↓ | -1.2 | 8.5E-04 | 7.6E-02 |
| chr16:68547476-68548035 | 560  | 4.8 | 4.4 | 5.1 | ↓ | -0.7 | 4.6E-06 | 1.3E-03 |
| chr16:69041334-69041928 | 595  | 3.3 | 2.9 | 3.6 | ↓ | -0.7 | 6.3E-04 | 6.4E-02 |
| chr16:71184560-71184920 | 361  | 2.7 | 2.2 | 3.1 | ↓ | -0.9 | 8.2E-04 | 7.5E-02 |
| chr16:71330722-71331264 | 543  | 2.8 | 1.9 | 3.4 | ↓ | -1.5 | 1.0E-09 | 8.5E-07 |
| chr16:71333478-71333849 | 372  | 2.0 | 1.4 | 2.4 | ↓ | -1.0 | 1.1E-03 | 8.6E-02 |
| chr16:71767916-71768683 | 768  | 3.5 | 3.2 | 3.8 | ↓ | -0.6 | 9.5E-04 | 8.1E-02 |
| chr16:71816296-71816618 | 323  | 3.1 | 2.5 | 3.5 | ↓ | -0.9 | 5.3E-05 | 1.0E-02 |
| chr16:71913644-71914404 | 761  | 4.5 | 4.7 | 4.2 | ↑ | 0.5  | 6.2E-04 | 6.4E-02 |
| chr16:72156167-72157156 | 990  | 4.4 | 4.1 | 4.6 | ↓ | -0.5 | 5.3E-04 | 5.7E-02 |
| chr16:72165219-72165632 | 414  | 1.9 | 2.4 | 1.1 | ↑ | 1.2  | 3.1E-04 | 3.9E-02 |
| chr16:73389839-73390250 | 412  | 3.2 | 2.8 | 3.6 | ↓ | -0.8 | 3.8E-04 | 4.6E-02 |
| chr16:73763500-73763993 | 494  | 4.3 | 3.9 | 4.6 | ↓ | -0.7 | 2.2E-07 | 1.1E-04 |
| chr16:74096826-74097220 | 395  | 3.7 | 3.1 | 4.2 | ↓ | -1.0 | 8.7E-09 | 6.3E-06 |
| chr16:74881577-74882194 | 618  | 3.2 | 2.7 | 3.6 | ↓ | -0.9 | 5.1E-04 | 5.6E-02 |
| chr16:75214551-75214946 | 396  | 2.7 | 2.2 | 3.0 | ↓ | -0.8 | 1.3E-03 | 9.9E-02 |
| chr16:75447551-75447871 | 321  | 2.1 | 1.4 | 2.5 | ↓ | -1.2 | 1.3E-04 | 2.1E-02 |
| chr16:77470034-77470801 | 768  | 3.0 | 3.5 | 2.1 | ↑ | 1.4  | 8.2E-08 | 4.6E-05 |
| chr16:77471355-77471939 | 585  | 3.0 | 3.4 | 2.5 | ↑ | 0.9  | 2.6E-05 | 5.6E-03 |
| chr16:77860821-77862006 | 1186 | 4.3 | 4.0 | 4.5 | ↓ | -0.5 | 8.1E-04 | 7.5E-02 |
| chr16:77974521-77975047 | 527  | 2.7 | 3.2 | 2.1 | ↑ | 1.1  | 1.4E-04 | 2.1E-02 |
| chr16:78078008-78078449 | 442  | 3.1 | 3.4 | 2.6 | ↑ | 0.8  | 5.1E-04 | 5.6E-02 |
| chr16:78423010-78423440 | 431  | 4.9 | 5.1 | 4.6 | ↑ | 0.5  | 1.1E-03 | 8.9E-02 |
| chr16:78545916-78546654 | 739  | 4.4 | 3.7 | 4.8 | ↓ | -1.1 | 7.1E-15 | 1.9E-11 |
| chr16:78671722-78672015 | 294  | 2.2 | 2.7 | 1.2 | ↑ | 1.5  | 5.6E-07 | 2.3E-04 |
| chr16:78896052-78896423 | 372  | 3.0 | 2.2 | 3.6 | ↓ | -1.3 | 1.8E-08 | 1.2E-05 |
| chr16:79619469-79619664 | 196  | 1.6 | 2.1 | 0.9 | ↑ | 1.2  | 9.8E-04 | 8.2E-02 |
| chr16:79639396-79639852 | 457  | 2.8 | 2.3 | 3.2 | ↓ | -0.9 | 9.9E-05 | 1.8E-02 |
| chr16:79652867-79653252 | 386  | 2.3 | 2.7 | 1.7 | ↑ | 1.1  | 2.8E-04 | 3.7E-02 |
| chr16:80180430-80181512 | 1083 | 5.5 | 5.1 | 5.8 | ↓ | -0.7 | 6.6E-11 | 7.0E-08 |
| chr16:80192103-80192678 | 576  | 3.8 | 3.1 | 4.3 | ↓ | -1.2 | 4.6E-10 | 4.0E-07 |
| chr16:80192748-80193070 | 323  | 3.3 | 2.6 | 3.8 | ↓ | -1.2 | 2.7E-08 | 1.7E-05 |
| chr16:80262433-80262881 | 449  | 3.1 | 2.6 | 3.5 | ↓ | -0.8 | 8.1E-04 | 7.5E-02 |
| chr16:80346661-80347181 | 521  | 4.6 | 4.9 | 4.3 | ↑ | 0.6  | 2.6E-04 | 3.6E-02 |
| chr16:80351071-80352027 | 957  | 5.0 | 5.2 | 4.8 | ↑ | 0.4  | 1.1E-03 | 8.8E-02 |
| chr16:80387511-80388630 | 1120 | 4.9 | 5.1 | 4.6 | ↑ | 0.5  | 9.9E-07 | 3.5E-04 |
| chr16:80517030-80518865 | 1836 | 6.4 | 6.6 | 6.2 | ↑ | 0.3  | 8.3E-07 | 3.1E-04 |

|                         |       |     |     |     |   |      |         |         |
|-------------------------|-------|-----|-----|-----|---|------|---------|---------|
| chr16:80836916-80838562 | 1647  | 5.4 | 5.5 | 5.2 | ↑ | 0.3  | 1.0E-03 | 8.6E-02 |
| chr16:81606336-81607236 | 901   | 3.7 | 3.3 | 4.0 | ↓ | -0.6 | 1.3E-03 | 9.9E-02 |
| chr16:81614986-81617508 | 2523  | 7.1 | 7.0 | 7.2 | ↓ | -0.2 | 4.2E-05 | 8.3E-03 |
| chr16:81643601-81644479 | 879   | 4.9 | 5.1 | 4.7 | ↑ | 0.5  | 1.0E-04 | 1.8E-02 |
| chr16:82159594-82160617 | 1024  | 4.7 | 4.5 | 4.9 | ↓ | -0.4 | 1.2E-03 | 9.3E-02 |
| chr16:82593173-82594929 | 1757  | 6.1 | 5.9 | 6.2 | ↓ | -0.3 | 2.2E-05 | 5.2E-03 |
| chr16:82831534-82831913 | 380   | 3.1 | 2.7 | 3.4 | ↓ | -0.7 | 6.4E-04 | 6.4E-02 |
| chr16:82981737-82982630 | 894   | 4.7 | 4.4 | 4.9 | ↓ | -0.5 | 3.9E-04 | 4.6E-02 |
| chr16:83252840-83253399 | 560   | 3.5 | 3.1 | 3.8 | ↓ | -0.7 | 1.2E-04 | 2.0E-02 |
| chr16:83255482-83256461 | 980   | 4.3 | 4.0 | 4.6 | ↓ | -0.6 | 1.2E-03 | 9.3E-02 |
| chr16:83265771-83266988 | 1218  | 5.3 | 5.0 | 5.5 | ↓ | -0.5 | 3.8E-05 | 8.0E-03 |
| chr16:83282598-83282978 | 381   | 2.3 | 1.8 | 2.8 | ↓ | -1.0 | 5.7E-04 | 6.1E-02 |
| chr16:83520036-83520500 | 465   | 2.6 | 2.0 | 3.0 | ↓ | -1.0 | 5.2E-04 | 5.7E-02 |
| chr16:83626940-83627566 | 627   | 3.5 | 2.8 | 3.9 | ↓ | -1.1 | 7.3E-07 | 2.9E-04 |
| chr16:83632214-83634340 | 2127  | 5.5 | 5.3 | 5.7 | ↓ | -0.4 | 5.0E-04 | 5.6E-02 |
| chr16:83784141-83784934 | 794   | 3.9 | 3.4 | 4.2 | ↓ | -0.8 | 8.0E-05 | 1.5E-02 |
| chr16:83820113-83821230 | 1118  | 4.1 | 3.6 | 4.4 | ↓ | -0.8 | 2.4E-05 | 5.3E-03 |
| chr16:83873703-83874913 | 1211  | 5.2 | 5.0 | 5.5 | ↓ | -0.5 | 4.2E-06 | 1.2E-03 |
| chr16:83901915-83903940 | 2026  | 6.3 | 6.1 | 6.4 | ↓ | -0.3 | 2.8E-04 | 3.7E-02 |
| chr16:83957009-83958435 | 1427  | 5.3 | 5.0 | 5.5 | ↓ | -0.5 | 3.0E-04 | 3.8E-02 |
| chr16:84111767-84112577 | 811   | 3.9 | 3.1 | 4.4 | ↓ | -1.2 | 6.1E-11 | 6.8E-08 |
| chr16:84122898-84124337 | 1440  | 5.1 | 4.9 | 5.3 | ↓ | -0.4 | 8.7E-04 | 7.8E-02 |
| chr16:84126168-84129579 | 3412  | 7.5 | 7.4 | 7.6 | ↓ | -0.3 | 1.1E-04 | 1.8E-02 |
| chr16:84251612-84251965 | 354   | 3.4 | 2.3 | 4.0 | ↓ | -1.7 | 2.2E-12 | 3.1E-09 |
| chr16:84264367-84267625 | 3259  | 7.6 | 7.5 | 7.7 | ↓ | -0.2 | 7.8E-04 | 7.4E-02 |
| chr16:84364316-84365046 | 731   | 3.4 | 2.8 | 3.8 | ↓ | -1.0 | 5.5E-07 | 2.3E-04 |
| chr16:84369636-84370389 | 754   | 4.5 | 4.2 | 4.7 | ↓ | -0.5 | 9.4E-05 | 1.7E-02 |
| chr16:84378770-84382476 | 3707  | 6.7 | 6.5 | 6.9 | ↓ | -0.4 | 1.8E-07 | 9.3E-05 |
| chr16:84406861-84407320 | 460   | 4.4 | 4.0 | 4.7 | ↓ | -0.7 | 2.8E-04 | 3.7E-02 |
| chr16:84409250-84412360 | 3111  | 7.0 | 6.7 | 7.2 | ↓ | -0.5 | 3.0E-13 | 5.8E-10 |
| chr16:85053191-85054316 | 1126  | 6.1 | 6.2 | 5.9 | ↑ | 0.3  | 9.2E-04 | 8.0E-02 |
| chr16:85242149-85244757 | 2609  | 6.3 | 6.1 | 6.4 | ↓ | -0.3 | 9.8E-04 | 8.2E-02 |
| chr16:85280460-85291833 | 11374 | 8.9 | 8.8 | 9.0 | ↓ | -0.2 | 1.6E-06 | 5.5E-04 |
| chr16:85312881-85314609 | 1729  | 6.7 | 6.5 | 6.8 | ↓ | -0.3 | 4.0E-05 | 8.1E-03 |
| chr16:85491976-85494986 | 3011  | 7.1 | 7.0 | 7.2 | ↓ | -0.2 | 2.1E-04 | 3.1E-02 |
| chr16:85580015-85589551 | 9537  | 9.5 | 9.4 | 9.6 | ↓ | -0.2 | 1.0E-06 | 3.7E-04 |
| chr16:85900807-85902418 | 1612  | 6.9 | 6.7 | 7.0 | ↓ | -0.3 | 1.1E-06 | 3.8E-04 |
| chr16:86017327-86017789 | 463   | 3.1 | 2.6 | 3.5 | ↓ | -0.9 | 1.1E-05 | 2.7E-03 |
| chr16:86118216-86118488 | 273   | 2.6 | 2.1 | 3.0 | ↓ | -0.9 | 1.1E-03 | 8.9E-02 |
| chr16:86343951-86344350 | 400   | 1.9 | 1.2 | 2.3 | ↓ | -1.1 | 1.3E-03 | 9.8E-02 |
| chr16:86545615-86546339 | 725   | 3.3 | 2.8 | 3.6 | ↓ | -0.9 | 6.8E-05 | 1.3E-02 |
| chr16:86614991-86616972 | 1982  | 4.9 | 4.5 | 5.1 | ↓ | -0.6 | 1.5E-04 | 2.3E-02 |
| chr16:86669674-86670248 | 575   | 2.7 | 2.2 | 3.1 | ↓ | -0.9 | 3.5E-04 | 4.3E-02 |
| chr16:9508563-9508913   | 351   | 3.1 | 3.5 | 2.7 | ↑ | 0.8  | 2.8E-04 | 3.7E-02 |
| chr16:9514580-9514863   | 284   | 2.0 | 1.1 | 2.5 | ↓ | -1.4 | 1.6E-05 | 4.0E-03 |
| chr16:9676837-9678556   | 1720  | 5.3 | 5.0 | 5.5 | ↓ | -0.5 | 4.4E-07 | 1.9E-04 |
| chr16:9680977-9681984   | 1008  | 4.9 | 4.4 | 5.3 | ↓ | -0.9 | 4.5E-15 | 1.4E-11 |

|                         |      |     |     |     |   |      |         |         |
|-------------------------|------|-----|-----|-----|---|------|---------|---------|
| chr17:1129397-1129712   | 316  | 2.5 | 1.9 | 3.0 | ↓ | -1.1 | 3.6E-05 | 1.3E-02 |
| chr17:11345322-11345539 | 218  | 2.1 | 1.5 | 2.6 | ↓ | -1.1 | 3.8E-04 | 6.4E-02 |
| chr17:11845384-11846195 | 812  | 4.1 | 4.3 | 3.8 | ↑ | 0.6  | 6.8E-04 | 9.3E-02 |
| chr17:11957183-11957553 | 371  | 2.8 | 2.0 | 3.3 | ↓ | -1.3 | 1.8E-07 | 1.7E-04 |
| chr17:12517567-12518033 | 467  | 3.1 | 2.7 | 3.5 | ↓ | -0.8 | 5.0E-04 | 7.7E-02 |
| chr17:14547453-14548040 | 588  | 4.4 | 4.0 | 4.7 | ↓ | -0.7 | 5.6E-05 | 1.8E-02 |
| chr17:14552459-14552837 | 379  | 3.5 | 2.3 | 4.1 | ↓ | -1.7 | 1.4E-12 | 7.4E-09 |
| chr17:14553288-14553541 | 254  | 1.8 | 1.1 | 2.3 | ↓ | -1.3 | 1.4E-04 | 3.4E-02 |
| chr17:14787544-14788091 | 548  | 3.9 | 3.5 | 4.1 | ↓ | -0.6 | 1.3E-04 | 3.4E-02 |
| chr17:15770858-15771532 | 675  | 3.7 | 4.0 | 3.2 | ↑ | 0.8  | 1.3E-05 | 5.7E-03 |
| chr17:16300572-16300827 | 256  | 2.0 | 1.4 | 2.4 | ↓ | -1.1 | 5.2E-04 | 7.9E-02 |
| chr17:17803077-17803370 | 294  | 3.2 | 2.5 | 3.6 | ↓ | -1.1 | 4.9E-07 | 4.1E-04 |
| chr17:18873223-18873601 | 379  | 3.9 | 3.6 | 4.1 | ↓ | -0.5 | 6.5E-04 | 9.1E-02 |
| chr17:19007034-19007460 | 427  | 3.4 | 3.1 | 3.7 | ↓ | -0.7 | 3.7E-04 | 6.3E-02 |
| chr17:19073461-19073786 | 326  | 3.2 | 3.6 | 2.6 | ↑ | 1.0  | 1.5E-05 | 6.3E-03 |
| chr17:19969840-19970103 | 264  | 2.2 | 1.6 | 2.7 | ↓ | -1.1 | 2.4E-04 | 4.8E-02 |
| chr17:20428474-20429380 | 907  | 3.9 | 3.5 | 4.2 | ↓ | -0.6 | 9.2E-05 | 2.6E-02 |
| chr17:20432722-20433081 | 360  | 3.4 | 2.9 | 3.7 | ↓ | -0.8 | 7.7E-05 | 2.3E-02 |
| chr17:21884200-21884421 | 222  | 2.2 | 1.5 | 2.6 | ↓ | -1.0 | 6.5E-04 | 9.1E-02 |
| chr17:21930226-21930651 | 426  | 3.6 | 3.1 | 4.0 | ↓ | -0.9 | 1.8E-04 | 4.1E-02 |
| chr17:21930716-21931744 | 1029 | 4.9 | 4.6 | 5.2 | ↓ | -0.6 | 2.7E-06 | 1.5E-03 |
| chr17:22067187-22068237 | 1051 | 5.9 | 5.7 | 6.1 | ↓ | -0.4 | 2.3E-04 | 4.8E-02 |
| chr17:22094403-22094790 | 388  | 3.2 | 2.7 | 3.5 | ↓ | -0.7 | 7.2E-04 | 9.7E-02 |
| chr17:22097779-22098318 | 540  | 3.5 | 3.0 | 3.9 | ↓ | -0.9 | 4.7E-05 | 1.5E-02 |
| chr17:22278491-22279201 | 711  | 3.2 | 2.6 | 3.6 | ↓ | -1.0 | 7.0E-06 | 3.5E-03 |
| chr17:22437271-22437819 | 549  | 4.3 | 3.9 | 4.6 | ↓ | -0.7 | 1.2E-06 | 7.8E-04 |
| chr17:22462021-22462588 | 568  | 3.3 | 2.7 | 3.7 | ↓ | -1.0 | 4.0E-06 | 2.1E-03 |
| chr17:22463076-22464347 | 1272 | 5.6 | 5.3 | 5.9 | ↓ | -0.6 | 5.4E-08 | 7.0E-05 |
| chr17:22509817-22510174 | 358  | 2.3 | 1.3 | 2.8 | ↓ | -1.5 | 1.4E-06 | 8.4E-04 |
| chr17:22510968-22511147 | 180  | 1.8 | 0.7 | 2.4 | ↓ | -1.7 | 4.2E-07 | 3.6E-04 |
| chr17:22512815-22513078 | 264  | 3.2 | 2.8 | 3.6 | ↓ | -0.8 | 2.3E-04 | 4.8E-02 |
| chr17:22877709-22877970 | 262  | 2.9 | 2.3 | 3.3 | ↓ | -1.0 | 2.5E-05 | 9.6E-03 |
| chr17:22964855-22965044 | 190  | 1.5 | 0.5 | 2.1 | ↓ | -1.5 | 7.5E-05 | 2.3E-02 |
| chr17:22965763-22966466 | 704  | 3.9 | 3.3 | 4.3 | ↓ | -0.9 | 9.8E-08 | 1.1E-04 |
| chr17:22968083-22968597 | 515  | 2.8 | 1.5 | 3.5 | ↓ | -2.0 | 4.2E-14 | 2.7E-10 |
| chr17:22969375-22969857 | 483  | 3.5 | 2.8 | 4.0 | ↓ | -1.3 | 3.4E-11 | 1.1E-07 |
| chr17:24440851-24441329 | 479  | 3.6 | 3.2 | 3.9 | ↓ | -0.7 | 5.7E-04 | 8.3E-02 |
| chr17:27387818-27388529 | 712  | 3.8 | 4.1 | 3.3 | ↑ | 0.9  | 3.4E-06 | 1.8E-03 |
| chr17:27837256-27837609 | 354  | 3.0 | 2.4 | 3.4 | ↓ | -1.0 | 3.4E-05 | 1.2E-02 |
| chr17:28687259-28687626 | 368  | 3.0 | 2.5 | 3.4 | ↓ | -0.9 | 2.5E-04 | 5.0E-02 |
| chr17:31452326-31452713 | 388  | 3.2 | 2.7 | 3.5 | ↓ | -0.8 | 4.2E-04 | 6.9E-02 |
| chr17:32306448-32306763 | 316  | 3.2 | 2.8 | 3.6 | ↓ | -0.8 | 1.6E-04 | 3.7E-02 |
| chr17:33454976-33455828 | 853  | 4.3 | 3.8 | 4.7 | ↓ | -0.9 | 7.8E-10 | 1.8E-06 |
| chr17:33478997-33479766 | 770  | 4.2 | 3.9 | 4.4 | ↓ | -0.5 | 5.1E-04 | 7.8E-02 |
| chr17:33839532-33839832 | 301  | 2.3 | 2.8 | 1.6 | ↑ | 1.2  | 2.1E-05 | 8.2E-03 |
| chr17:33980179-33981824 | 1646 | 5.8 | 5.6 | 5.9 | ↓ | -0.3 | 2.7E-04 | 5.3E-02 |
| chr17:33995424-33996270 | 847  | 4.8 | 4.5 | 5.0 | ↓ | -0.6 | 6.2E-05 | 1.9E-02 |

|                         |      |     |     |     |   |      |         |         |
|-------------------------|------|-----|-----|-----|---|------|---------|---------|
| chr17:34159603-34160367 | 765  | 4.1 | 3.8 | 4.4 | ↓ | -0.7 | 2.3E-05 | 8.9E-03 |
| chr17:34393355-34394852 | 1498 | 5.6 | 5.9 | 5.4 | ↑ | 0.5  | 1.6E-04 | 3.7E-02 |
| chr17:34848788-34848982 | 195  | 2.0 | 2.4 | 1.3 | ↑ | 1.1  | 3.8E-04 | 6.4E-02 |
| chr17:34877045-34878281 | 1237 | 5.6 | 5.4 | 5.8 | ↓ | -0.4 | 3.8E-05 | 1.3E-02 |
| chr17:34881092-34881846 | 755  | 4.0 | 3.6 | 4.3 | ↓ | -0.6 | 6.7E-05 | 2.0E-02 |
| chr17:36323348-36323847 | 500  | 4.0 | 4.3 | 3.7 | ↑ | 0.6  | 1.5E-04 | 3.7E-02 |
| chr17:36829047-36829482 | 436  | 3.6 | 3.2 | 3.9 | ↓ | -0.6 | 4.6E-04 | 7.3E-02 |
| chr17:37255569-37256963 | 1395 | 5.9 | 6.1 | 5.7 | ↑ | 0.4  | 3.3E-06 | 1.8E-03 |
| chr17:38802958-38803381 | 424  | 3.1 | 2.3 | 3.7 | ↓ | -1.3 | 5.7E-07 | 4.5E-04 |
| chr17:39243988-39244513 | 526  | 5.2 | 4.9 | 5.3 | ↓ | -0.4 | 4.6E-04 | 7.3E-02 |
| chr17:40664267-40664596 | 330  | 2.9 | 2.3 | 3.3 | ↓ | -1.0 | 1.1E-04 | 2.8E-02 |
| chr17:40720930-40721242 | 313  | 3.1 | 3.4 | 2.6 | ↑ | 0.7  | 4.6E-04 | 7.3E-02 |
| chr17:41010277-41011514 | 1238 | 5.6 | 5.4 | 5.8 | ↓ | -0.3 | 4.6E-04 | 7.3E-02 |
| chr17:41166336-41166664 | 329  | 2.3 | 2.9 | 1.4 | ↑ | 1.5  | 5.2E-07 | 4.2E-04 |
| chr17:41560728-41561028 | 301  | 3.8 | 3.4 | 4.1 | ↓ | -0.7 | 2.0E-04 | 4.3E-02 |
| chr17:42185938-42187088 | 1151 | 5.6 | 5.8 | 5.4 | ↑ | 0.3  | 5.1E-04 | 7.8E-02 |
| chr17:43916954-43917359 | 406  | 3.8 | 3.4 | 4.0 | ↓ | -0.6 | 5.1E-04 | 7.8E-02 |
| chr17:45250823-45251131 | 309  | 2.4 | 2.9 | 1.4 | ↑ | 1.5  | 1.8E-07 | 1.7E-04 |
| chr17:45976755-45977467 | 713  | 4.1 | 3.8 | 4.4 | ↓ | -0.6 | 1.0E-04 | 2.7E-02 |
| chr17:46018323-46019300 | 978  | 5.3 | 5.1 | 5.5 | ↓ | -0.4 | 5.3E-04 | 7.9E-02 |
| chr17:46482256-46482742 | 487  | 3.8 | 4.1 | 3.5 | ↑ | 0.6  | 4.8E-04 | 7.5E-02 |
| chr17:46580527-46580843 | 317  | 2.3 | 1.5 | 2.8 | ↓ | -1.3 | 8.2E-05 | 2.3E-02 |
| chr17:46607726-46609159 | 1434 | 5.6 | 5.3 | 5.9 | ↓ | -0.7 | 1.1E-10 | 3.2E-07 |
| chr17:46852563-46852935 | 373  | 2.9 | 2.4 | 3.3 | ↓ | -0.9 | 1.0E-04 | 2.7E-02 |
| chr17:47275143-47275680 | 538  | 3.7 | 2.8 | 4.2 | ↓ | -1.4 | 2.8E-14 | 2.5E-10 |
| chr17:47399071-47399666 | 596  | 2.8 | 2.1 | 3.2 | ↓ | -1.1 | 3.9E-05 | 1.3E-02 |
| chr17:47537562-47537829 | 268  | 2.6 | 3.0 | 1.9 | ↑ | 1.1  | 5.9E-05 | 1.8E-02 |
| chr17:47788955-47789248 | 294  | 2.3 | 2.7 | 1.7 | ↑ | 1.1  | 6.9E-04 | 9.4E-02 |
| chr17:48071838-48072310 | 473  | 4.1 | 3.6 | 4.4 | ↓ | -0.8 | 4.6E-06 | 2.4E-03 |
| chr17:48374714-48375875 | 1162 | 6.4 | 6.0 | 6.7 | ↓ | -0.6 | 2.0E-09 | 4.0E-06 |
| chr17:48606144-48606539 | 396  | 4.2 | 3.8 | 4.4 | ↓ | -0.6 | 2.3E-04 | 4.8E-02 |
| chr17:48702830-48703418 | 589  | 3.7 | 4.2 | 2.9 | ↑ | 1.3  | 2.0E-06 | 1.2E-03 |
| chr17:48703534-48704027 | 494  | 2.9 | 3.3 | 2.4 | ↑ | 0.9  | 1.7E-04 | 4.0E-02 |
| chr17:48704370-48704678 | 309  | 2.6 | 3.0 | 2.1 | ↑ | 0.9  | 4.2E-04 | 6.9E-02 |
| chr17:48929458-48930020 | 563  | 4.2 | 3.9 | 4.5 | ↓ | -0.6 | 5.4E-04 | 7.9E-02 |
| chr17:48944218-48944394 | 177  | 1.6 | 0.8 | 2.1 | ↓ | -1.4 | 1.5E-04 | 3.7E-02 |
| chr17:48988822-48989888 | 1067 | 5.3 | 5.1 | 5.5 | ↓ | -0.4 | 3.2E-04 | 5.8E-02 |
| chr17:50597639-50597983 | 345  | 2.4 | 1.6 | 2.9 | ↓ | -1.4 | 2.0E-06 | 1.2E-03 |
| chr17:50764717-50765045 | 329  | 2.2 | 1.6 | 2.7 | ↓ | -1.0 | 5.5E-04 | 8.1E-02 |
| chr17:5094639-5095025   | 387  | 2.8 | 3.2 | 2.3 | ↑ | 0.9  | 1.9E-04 | 4.2E-02 |
| chr17:51894571-51895063 | 493  | 4.7 | 4.3 | 5.1 | ↓ | -0.9 | 1.9E-07 | 1.7E-04 |
| chr17:51945080-51945418 | 339  | 2.1 | 1.5 | 2.6 | ↓ | -1.1 | 1.4E-04 | 3.4E-02 |
| chr17:52048038-52048774 | 737  | 4.7 | 4.5 | 4.9 | ↓ | -0.4 | 3.3E-04 | 6.0E-02 |
| chr17:52054098-52054784 | 687  | 3.5 | 3.2 | 3.8 | ↓ | -0.6 | 5.6E-04 | 8.2E-02 |
| chr17:52303181-52303596 | 416  | 4.2 | 4.5 | 3.7 | ↑ | 0.8  | 1.1E-06 | 7.4E-04 |
| chr17:52465449-52465942 | 494  | 3.0 | 2.3 | 3.5 | ↓ | -1.3 | 7.4E-08 | 9.1E-05 |
| chr17:52480773-52481969 | 1197 | 5.4 | 5.5 | 5.2 | ↑ | 0.4  | 7.8E-05 | 2.3E-02 |

|                         |      |     |     |     |   |      |         |         |
|-------------------------|------|-----|-----|-----|---|------|---------|---------|
| chr17:52640516-52641345 | 830  | 4.2 | 4.4 | 3.8 | ↑ | 0.6  | 3.0E-04 | 5.7E-02 |
| chr17:52780001-52780420 | 420  | 4.1 | 3.7 | 4.4 | ↓ | -0.7 | 3.2E-04 | 5.8E-02 |
| chr17:53261906-53262206 | 301  | 2.9 | 2.0 | 3.4 | ↓ | -1.4 | 6.9E-09 | 1.3E-05 |
| chr17:53726868-53727315 | 448  | 3.8 | 4.0 | 3.4 | ↑ | 0.6  | 2.0E-04 | 4.3E-02 |
| chr17:53813931-53814365 | 435  | 3.3 | 3.7 | 2.9 | ↑ | 0.7  | 4.2E-04 | 6.9E-02 |
| chr17:54162445-54162848 | 404  | 3.7 | 3.2 | 4.0 | ↓ | -0.9 | 1.3E-05 | 5.7E-03 |
| chr17:54866946-54867572 | 627  | 4.7 | 4.5 | 4.9 | ↓ | -0.4 | 4.2E-04 | 6.9E-02 |
| chr17:54890636-54891385 | 750  | 5.1 | 4.9 | 5.4 | ↓ | -0.5 | 8.6E-06 | 3.9E-03 |
| chr17:55001273-55001987 | 715  | 3.7 | 3.2 | 4.0 | ↓ | -0.8 | 1.1E-04 | 3.0E-02 |
| chr17:55014848-55015791 | 944  | 4.2 | 3.9 | 4.5 | ↓ | -0.7 | 1.3E-04 | 3.4E-02 |
| chr17:55170859-55171111 | 253  | 2.1 | 2.5 | 1.4 | ↑ | 1.2  | 1.5E-04 | 3.6E-02 |
| chr17:56198624-56200139 | 1516 | 6.1 | 6.0 | 6.3 | ↓ | -0.3 | 2.2E-04 | 4.7E-02 |
| chr17:56843313-56844302 | 990  | 4.5 | 4.7 | 4.3 | ↑ | 0.4  | 6.2E-04 | 8.8E-02 |
| chr17:57386784-57387431 | 648  | 3.9 | 4.2 | 3.6 | ↑ | 0.6  | 6.0E-04 | 8.6E-02 |
| chr17:57487544-57488093 | 550  | 4.7 | 4.9 | 4.4 | ↑ | 0.4  | 3.6E-04 | 6.2E-02 |
| chr17:57499157-57501563 | 2407 | 6.4 | 6.6 | 6.2 | ↑ | 0.3  | 1.6E-04 | 3.7E-02 |
| chr17:57913671-57914628 | 958  | 6.5 | 6.3 | 6.6 | ↓ | -0.3 | 1.4E-04 | 3.4E-02 |
| chr17:58343372-58344170 | 799  | 5.2 | 5.0 | 5.4 | ↓ | -0.4 | 1.8E-04 | 4.1E-02 |
| chr17:58488040-58488309 | 270  | 2.0 | 1.2 | 2.4 | ↓ | -1.2 | 3.4E-04 | 6.0E-02 |
| chr17:58566826-58567659 | 834  | 4.8 | 4.4 | 5.1 | ↓ | -0.6 | 8.7E-06 | 3.9E-03 |
| chr17:58704231-58706107 | 1877 | 6.7 | 6.6 | 6.8 | ↓ | -0.2 | 4.8E-04 | 7.5E-02 |
| chr17:59003992-59005146 | 1155 | 5.1 | 4.8 | 5.3 | ↓ | -0.5 | 4.5E-06 | 2.3E-03 |
| chr17:59105687-59106122 | 436  | 2.9 | 3.3 | 2.3 | ↑ | 1.0  | 3.2E-05 | 1.2E-02 |
| chr17:59346360-59347141 | 782  | 5.0 | 4.7 | 5.2 | ↓ | -0.5 | 2.9E-05 | 1.1E-02 |
| chr17:59347443-59347758 | 316  | 2.6 | 2.1 | 3.0 | ↓ | -0.9 | 6.7E-04 | 9.3E-02 |
| chr17:59402726-59405438 | 2713 | 7.8 | 7.7 | 7.9 | ↓ | -0.2 | 3.1E-04 | 5.7E-02 |
| chr17:59493633-59493948 | 316  | 1.9 | 2.3 | 1.2 | ↑ | 1.1  | 5.9E-04 | 8.6E-02 |
| chr17:59839537-59840672 | 1136 | 5.3 | 4.9 | 5.6 | ↓ | -0.6 | 4.5E-08 | 7.0E-05 |
| chr17:59923255-59926231 | 2977 | 7.1 | 7.2 | 6.9 | ↑ | 0.3  | 4.9E-05 | 1.6E-02 |
| chr17:60146417-60147109 | 693  | 4.4 | 4.2 | 4.7 | ↓ | -0.5 | 5.2E-04 | 7.8E-02 |
| chr17:60152291-60153032 | 742  | 3.9 | 3.4 | 4.2 | ↓ | -0.8 | 9.5E-07 | 6.6E-04 |
| chr17:60793568-60794006 | 439  | 4.5 | 4.1 | 4.8 | ↓ | -0.7 | 2.9E-04 | 5.6E-02 |
| chr17:60897343-60897821 | 479  | 3.3 | 2.8 | 3.7 | ↓ | -0.8 | 6.1E-04 | 8.7E-02 |
| chr17:60944251-60944949 | 699  | 5.1 | 4.7 | 5.4 | ↓ | -0.6 | 9.0E-07 | 6.4E-04 |
| chr17:61031999-61032715 | 717  | 4.1 | 3.7 | 4.3 | ↓ | -0.6 | 1.8E-04 | 4.1E-02 |
| chr17:61172144-61172433 | 290  | 2.8 | 2.2 | 3.2 | ↓ | -1.0 | 2.0E-05 | 8.0E-03 |
| chr17:61627119-61627506 | 388  | 3.2 | 2.8 | 3.5 | ↓ | -0.7 | 3.0E-04 | 5.7E-02 |
| chr17:61870487-61871096 | 610  | 4.2 | 3.9 | 4.5 | ↓ | -0.6 | 2.0E-05 | 8.0E-03 |
| chr17:62185879-62186101 | 223  | 2.2 | 1.5 | 2.7 | ↓ | -1.3 | 3.8E-05 | 1.3E-02 |
| chr17:62410047-62410286 | 240  | 2.5 | 1.4 | 3.0 | ↓ | -1.6 | 4.9E-08 | 7.0E-05 |
| chr17:62755888-62756170 | 283  | 2.8 | 2.0 | 3.3 | ↓ | -1.3 | 9.6E-08 | 1.1E-04 |
| chr17:62879201-62879398 | 198  | 1.8 | 1.0 | 2.3 | ↓ | -1.4 | 9.8E-05 | 2.7E-02 |
| chr17:62971546-62971970 | 425  | 4.0 | 3.6 | 4.3 | ↓ | -0.7 | 1.6E-05 | 6.4E-03 |
| chr17:63133127-63133847 | 721  | 5.2 | 4.9 | 5.4 | ↓ | -0.4 | 3.4E-04 | 6.0E-02 |
| chr17:63241319-63241622 | 304  | 2.5 | 2.9 | 2.0 | ↑ | 1.0  | 3.7E-04 | 6.3E-02 |
| chr17:63712784-63713411 | 628  | 3.7 | 4.0 | 3.3 | ↑ | 0.6  | 2.5E-04 | 5.0E-02 |
| chr17:63822062-63822295 | 234  | 2.2 | 1.6 | 2.7 | ↓ | -1.1 | 1.2E-04 | 3.1E-02 |

|                         |      |     |     |     |   |      |         |         |
|-------------------------|------|-----|-----|-----|---|------|---------|---------|
| chr17:64038690-64039436 | 747  | 3.9 | 4.2 | 3.6 | ↑ | 0.6  | 3.1E-04 | 5.8E-02 |
| chr17:64475658-64476168 | 511  | 3.8 | 3.5 | 4.1 | ↓ | -0.7 | 2.0E-04 | 4.3E-02 |
| chr17:64634199-64634641 | 443  | 3.4 | 2.8 | 3.8 | ↓ | -1.0 | 6.1E-04 | 8.7E-02 |
| chr17:64738872-64740337 | 1466 | 6.2 | 6.0 | 6.5 | ↓ | -0.5 | 1.2E-07 | 1.3E-04 |
| chr17:64758796-64761116 | 2321 | 6.5 | 6.4 | 6.6 | ↓ | -0.2 | 3.1E-04 | 5.7E-02 |
| chr17:64789854-64792183 | 2330 | 6.4 | 6.3 | 6.6 | ↓ | -0.3 | 2.9E-04 | 5.5E-02 |
| chr17:64833928-64835904 | 1977 | 6.2 | 6.0 | 6.3 | ↓ | -0.4 | 3.9E-05 | 1.3E-02 |
| chr17:64841666-64843237 | 1572 | 4.9 | 4.6 | 5.2 | ↓ | -0.6 | 1.1E-05 | 4.6E-03 |
| chr17:64878350-64878918 | 569  | 4.7 | 4.2 | 5.1 | ↓ | -0.9 | 4.5E-12 | 2.0E-08 |
| chr17:65053502-65053896 | 395  | 2.4 | 2.8 | 1.8 | ↑ | 1.0  | 3.1E-04 | 5.8E-02 |
| chr17:65334133-65334560 | 428  | 3.1 | 2.6 | 3.4 | ↓ | -0.8 | 7.9E-05 | 2.3E-02 |
| chr17:65462080-65463080 | 1001 | 4.3 | 3.9 | 4.6 | ↓ | -0.6 | 2.4E-05 | 9.3E-03 |
| chr17:65550820-65551160 | 341  | 2.9 | 3.2 | 2.4 | ↑ | 0.8  | 7.2E-04 | 9.7E-02 |
| chr17:65648847-65649497 | 651  | 5.6 | 5.8 | 5.4 | ↑ | 0.3  | 5.3E-05 | 1.7E-02 |
| chr17:65778251-65779156 | 906  | 4.6 | 4.3 | 4.9 | ↓ | -0.5 | 1.0E-04 | 2.7E-02 |
| chr17:65889750-65891179 | 1430 | 6.4 | 6.2 | 6.5 | ↓ | -0.3 | 1.4E-04 | 3.4E-02 |
| chr17:66192106-66193118 | 1013 | 5.9 | 5.7 | 6.2 | ↓ | -0.5 | 9.6E-07 | 6.6E-04 |
| chr17:66414708-66415982 | 1275 | 5.4 | 5.0 | 5.7 | ↓ | -0.6 | 2.0E-07 | 1.8E-04 |
| chr17:66624748-66625266 | 519  | 3.3 | 2.9 | 3.6 | ↓ | -0.7 | 6.8E-04 | 9.3E-02 |
| chr17:66694728-66695690 | 963  | 5.4 | 5.2 | 5.6 | ↓ | -0.5 | 1.6E-07 | 1.6E-04 |
| chr17:66696827-66700331 | 3505 | 7.6 | 7.5 | 7.7 | ↓ | -0.2 | 3.2E-05 | 1.2E-02 |
| chr17:66871474-66872022 | 549  | 5.1 | 4.9 | 5.3 | ↓ | -0.4 | 2.5E-04 | 5.0E-02 |
| chr17:66937654-66940330 | 2677 | 6.5 | 6.3 | 6.7 | ↓ | -0.4 | 1.2E-06 | 7.8E-04 |
| chr17:66961150-66961999 | 850  | 3.9 | 3.4 | 4.2 | ↓ | -0.8 | 2.7E-06 | 1.5E-03 |
| chr17:66970034-66971439 | 1406 | 5.8 | 5.5 | 6.1 | ↓ | -0.6 | 5.3E-08 | 7.0E-05 |
| chr17:66979849-66980970 | 1122 | 5.7 | 5.4 | 5.9 | ↓ | -0.5 | 5.0E-08 | 7.0E-05 |
| chr17:67181836-67182241 | 406  | 3.0 | 2.5 | 3.4 | ↓ | -0.9 | 7.8E-05 | 2.3E-02 |
| chr17:67245003-67246489 | 1487 | 5.5 | 5.1 | 5.8 | ↓ | -0.7 | 8.3E-09 | 1.4E-05 |
| chr17:67274543-67275784 | 1242 | 5.0 | 4.7 | 5.2 | ↓ | -0.6 | 2.0E-04 | 4.3E-02 |
| chr17:67717149-67717405 | 257  | 2.1 | 1.1 | 2.7 | ↓ | -1.6 | 6.1E-07 | 4.7E-04 |
| chr17:67736903-67737580 | 678  | 5.0 | 4.6 | 5.3 | ↓ | -0.7 | 7.1E-07 | 5.3E-04 |
| chr17:67977893-67980187 | 2295 | 6.3 | 6.2 | 6.5 | ↓ | -0.3 | 7.5E-06 | 3.6E-03 |
| chr17:68069431-68071187 | 1757 | 6.2 | 5.9 | 6.4 | ↓ | -0.4 | 3.3E-10 | 8.4E-07 |
| chr17:68102562-68104592 | 2031 | 6.7 | 6.6 | 6.8 | ↓ | -0.2 | 3.4E-04 | 6.0E-02 |
| chr17:68251452-68252462 | 1011 | 4.8 | 4.6 | 5.0 | ↓ | -0.5 | 2.2E-04 | 4.6E-02 |
| chr17:68291891-68293589 | 1699 | 7.1 | 7.0 | 7.2 | ↓ | -0.2 | 5.3E-04 | 7.9E-02 |
| chr17:68295861-68296711 | 851  | 6.1 | 5.9 | 6.4 | ↓ | -0.5 | 8.8E-06 | 3.9E-03 |
| chr17:68468388-68469781 | 1394 | 6.9 | 6.8 | 7.0 | ↓ | -0.2 | 3.8E-04 | 6.4E-02 |
| chr17:68595834-68596386 | 553  | 4.6 | 3.9 | 5.1 | ↓ | -1.2 | 8.4E-20 | 1.1E-15 |
| chr17:68615475-68616438 | 964  | 5.7 | 5.2 | 6.0 | ↓ | -0.8 | 8.0E-12 | 3.0E-08 |
| chr17:68737233-68738542 | 1310 | 6.2 | 6.1 | 6.4 | ↓ | -0.3 | 2.5E-04 | 5.0E-02 |
| chr17:68739075-68739628 | 554  | 3.6 | 3.2 | 3.9 | ↓ | -0.7 | 3.5E-04 | 6.2E-02 |
| chr17:68797244-68797966 | 723  | 4.2 | 3.8 | 4.5 | ↓ | -0.7 | 7.7E-06 | 3.6E-03 |
| chr17:68889406-68892820 | 3415 | 7.5 | 7.4 | 7.6 | ↓ | -0.2 | 7.2E-06 | 3.5E-03 |
| chr17:68896896-68897824 | 929  | 4.9 | 4.6 | 5.1 | ↓ | -0.5 | 2.3E-04 | 4.8E-02 |
| chr17:68926940-68932848 | 5909 | 8.8 | 8.7 | 8.9 | ↓ | -0.2 | 1.8E-09 | 3.9E-06 |
| chr17:69254480-69254912 | 433  | 3.0 | 2.4 | 3.4 | ↓ | -0.9 | 4.3E-04 | 7.0E-02 |



|                         |      |     |     |     |   |      |         |         |
|-------------------------|------|-----|-----|-----|---|------|---------|---------|
| chr17:69332530-69333118 | 589  | 4.1 | 3.7 | 4.3 | ↓ | -0.6 | 5.4E-04 | 7.9E-02 |
| chr17:69333195-69333728 | 534  | 4.9 | 4.0 | 5.4 | ↓ | -1.4 | 1.2E-21 | 3.2E-17 |
| chr17:8026295-8026583   | 289  | 2.0 | 2.4 | 1.3 | ↑ | 1.2  | 2.8E-04 | 5.5E-02 |
| chr17:9946127-9946601   | 475  | 3.2 | 3.5 | 2.7 | ↑ | 0.8  | 3.7E-04 | 6.3E-02 |
| chr18:10568957-10569343 | 387  | 3.4 | 3.7 | 3.0 | ↑ | 0.7  | 3.7E-04 | 6.7E-02 |
| chr18:10570560-10571176 | 617  | 4.8 | 5.0 | 4.5 | ↑ | 0.5  | 9.6E-05 | 2.5E-02 |
| chr18:1103190-1105138   | 1949 | 6.8 | 6.6 | 7.0 | ↓ | -0.4 | 1.4E-05 | 6.8E-03 |
| chr18:1112623-1113915   | 1293 | 6.7 | 6.6 | 6.9 | ↓ | -0.3 | 4.3E-05 | 1.5E-02 |
| chr18:12436384-12436993 | 610  | 5.5 | 5.2 | 5.7 | ↓ | -0.5 | 1.2E-07 | 1.1E-04 |
| chr18:12436997-12437456 | 460  | 2.9 | 2.3 | 3.3 | ↓ | -0.9 | 5.4E-05 | 1.8E-02 |
| chr18:1252994-1257489   | 4496 | 7.8 | 7.8 | 7.9 | ↓ | -0.2 | 2.8E-05 | 1.1E-02 |
| chr18:12791645-12792623 | 979  | 4.7 | 3.9 | 5.2 | ↓ | -1.3 | 2.3E-12 | 7.7E-09 |
| chr18:12820631-12820902 | 272  | 3.2 | 2.4 | 3.8 | ↓ | -1.4 | 5.1E-10 | 9.1E-07 |
| chr18:12849855-12850488 | 634  | 4.0 | 3.7 | 4.3 | ↓ | -0.6 | 6.0E-05 | 1.9E-02 |
| chr18:13536471-13536725 | 255  | 3.0 | 2.4 | 3.5 | ↓ | -1.1 | 5.1E-05 | 1.7E-02 |
| chr18:13542629-13542870 | 242  | 2.2 | 1.5 | 2.6 | ↓ | -1.1 | 4.4E-04 | 7.2E-02 |
| chr18:1453397-1455671   | 2275 | 7.3 | 7.2 | 7.4 | ↓ | -0.2 | 5.7E-04 | 8.5E-02 |
| chr18:16055945-16056328 | 384  | 3.2 | 3.6 | 2.8 | ↑ | 0.8  | 7.8E-05 | 2.2E-02 |
| chr18:16793802-16794112 | 311  | 2.6 | 3.0 | 2.0 | ↑ | 1.0  | 7.5E-05 | 2.2E-02 |
| chr18:1679663-1680126   | 464  | 4.4 | 4.2 | 4.6 | ↓ | -0.5 | 4.5E-04 | 7.2E-02 |
| chr18:17191163-17191448 | 286  | 1.9 | 2.4 | 1.1 | ↑ | 1.3  | 7.8E-05 | 2.2E-02 |
| chr18:17569276-17569540 | 265  | 2.7 | 2.1 | 3.1 | ↓ | -1.0 | 2.7E-04 | 5.5E-02 |
| chr18:17569845-17571675 | 1831 | 6.7 | 6.6 | 6.8 | ↓ | -0.3 | 5.5E-04 | 8.4E-02 |
| chr18:17636877-17637338 | 462  | 3.4 | 3.7 | 3.0 | ↑ | 0.7  | 6.3E-04 | 9.1E-02 |
| chr18:17707141-17708193 | 1053 | 5.2 | 5.0 | 5.4 | ↓ | -0.4 | 2.7E-04 | 5.4E-02 |
| chr18:17747956-17748437 | 482  | 3.9 | 3.6 | 4.2 | ↓ | -0.6 | 1.7E-04 | 4.0E-02 |
| chr18:17795429-17796167 | 739  | 4.6 | 4.1 | 4.9 | ↓ | -0.9 | 9.3E-07 | 7.0E-04 |
| chr18:17820474-17821175 | 702  | 5.3 | 5.0 | 5.5 | ↓ | -0.5 | 3.3E-04 | 6.4E-02 |
| chr18:1897073-1897363   | 291  | 3.9 | 3.6 | 4.2 | ↓ | -0.6 | 2.9E-04 | 5.7E-02 |
| chr18:19024453-19024964 | 512  | 3.3 | 3.0 | 3.6 | ↓ | -0.7 | 5.1E-04 | 7.8E-02 |
| chr18:19886045-19886594 | 550  | 5.8 | 5.6 | 5.9 | ↓ | -0.4 | 4.2E-05 | 1.5E-02 |
| chr18:20622278-20622694 | 417  | 3.5 | 3.8 | 3.1 | ↑ | 0.7  | 3.5E-04 | 6.6E-02 |
| chr18:20760298-20760870 | 573  | 5.3 | 5.5 | 5.0 | ↑ | 0.5  | 1.8E-06 | 1.2E-03 |
| chr18:2078471-2080537   | 2067 | 7.2 | 7.1 | 7.4 | ↓ | -0.2 | 1.4E-04 | 3.5E-02 |
| chr18:20888056-20888832 | 777  | 6.8 | 6.7 | 6.9 | ↓ | -0.2 | 2.4E-04 | 5.3E-02 |
| chr18:21043738-21044181 | 444  | 3.8 | 3.3 | 4.1 | ↓ | -0.8 | 8.2E-05 | 2.2E-02 |
| chr18:21139657-21140925 | 1269 | 6.4 | 6.3 | 6.5 | ↓ | -0.2 | 6.2E-04 | 9.1E-02 |
| chr18:2233736-2234040   | 305  | 4.4 | 4.0 | 4.7 | ↓ | -0.7 | 7.8E-07 | 6.0E-04 |
| chr18:23406809-23407006 | 198  | 2.6 | 2.0 | 3.0 | ↓ | -1.0 | 1.3E-04 | 3.4E-02 |
| chr18:2724281-2725416   | 1136 | 5.0 | 4.7 | 5.2 | ↓ | -0.4 | 7.1E-04 | 9.8E-02 |
| chr18:27340313-27340684 | 372  | 2.9 | 2.3 | 3.3 | ↓ | -1.0 | 1.5E-05 | 6.8E-03 |
| chr18:27476337-27477207 | 871  | 5.5 | 5.2 | 5.7 | ↓ | -0.5 | 3.5E-06 | 2.0E-03 |
| chr18:27536678-27536873 | 196  | 2.1 | 1.4 | 2.5 | ↓ | -1.1 | 3.6E-04 | 6.6E-02 |
| chr18:27540413-27540621 | 209  | 1.7 | 1.0 | 2.2 | ↓ | -1.2 | 5.7E-04 | 8.5E-02 |
| chr18:2832988-2833327   | 340  | 2.8 | 2.3 | 3.2 | ↓ | -0.8 | 3.6E-04 | 6.6E-02 |
| chr18:28938858-28939342 | 485  | 2.9 | 1.7 | 3.6 | ↓ | -1.8 | 2.1E-13 | 9.5E-10 |
| chr18:2909996-2911306   | 1311 | 5.4 | 5.0 | 5.7 | ↓ | -0.7 | 2.1E-11 | 4.8E-08 |

|                         |      |     |     |     |   |      |         |         |
|-------------------------|------|-----|-----|-----|---|------|---------|---------|
| chr18:3032618-3032898   | 281  | 2.2 | 1.6 | 2.6 | ↓ | -1.0 | 4.2E-04 | 7.1E-02 |
| chr18:31946652-31946883 | 232  | 2.5 | 2.0 | 2.9 | ↓ | -1.0 | 4.1E-04 | 7.1E-02 |
| chr18:3199948-3202579   | 2632 | 7.4 | 7.3 | 7.5 | ↓ | -0.2 | 4.0E-04 | 6.9E-02 |
| chr18:32542149-32542413 | 265  | 3.0 | 2.5 | 3.4 | ↓ | -0.9 | 4.3E-05 | 1.5E-02 |
| chr18:32793237-32793706 | 470  | 4.4 | 4.6 | 4.2 | ↑ | 0.5  | 3.9E-04 | 6.9E-02 |
| chr18:33660493-33660777 | 285  | 2.6 | 2.2 | 3.0 | ↓ | -0.8 | 7.4E-04 | 9.9E-02 |
| chr18:3387368-3389683   | 2316 | 6.8 | 6.6 | 7.0 | ↓ | -0.4 | 5.2E-05 | 1.8E-02 |
| chr18:3427721-3430506   | 2786 | 7.3 | 7.2 | 7.4 | ↓ | -0.2 | 1.9E-04 | 4.3E-02 |
| chr18:34343907-34344189 | 283  | 3.3 | 3.6 | 2.8 | ↑ | 0.8  | 3.6E-04 | 6.6E-02 |
| chr18:34457008-34457174 | 167  | 1.8 | 1.0 | 2.4 | ↓ | -1.4 | 5.5E-05 | 1.8E-02 |
| chr18:36326893-36327255 | 363  | 3.6 | 3.3 | 3.9 | ↓ | -0.7 | 4.2E-04 | 7.1E-02 |
| chr18:36943732-36944187 | 456  | 4.5 | 4.2 | 4.7 | ↓ | -0.5 | 6.6E-04 | 9.3E-02 |
| chr18:37270073-37270436 | 364  | 4.0 | 3.5 | 4.4 | ↓ | -0.9 | 2.9E-07 | 2.5E-04 |
| chr18:3773773-3774726   | 954  | 5.5 | 5.3 | 5.7 | ↓ | -0.4 | 6.1E-05 | 1.9E-02 |
| chr18:386121-386838     | 718  | 6.8 | 6.6 | 6.9 | ↓ | -0.2 | 6.7E-04 | 9.4E-02 |
| chr18:3920070-3920545   | 476  | 3.7 | 3.3 | 4.1 | ↓ | -0.8 | 2.6E-06 | 1.5E-03 |
| chr18:40460296-40460688 | 393  | 2.1 | 2.6 | 1.5 | ↑ | 1.1  | 4.7E-04 | 7.4E-02 |
| chr18:4099017-4099452   | 436  | 2.3 | 2.8 | 1.6 | ↑ | 1.2  | 1.4E-05 | 6.8E-03 |
| chr18:41126184-41126359 | 176  | 2.0 | 1.3 | 2.5 | ↓ | -1.2 | 1.7E-04 | 4.0E-02 |
| chr18:41834708-41834984 | 277  | 2.6 | 1.9 | 3.1 | ↓ | -1.2 | 4.3E-04 | 7.2E-02 |
| chr18:42459008-42459249 | 242  | 1.8 | 2.6 | 0.1 | ↑ | 2.5  | 3.1E-11 | 6.4E-08 |
| chr18:42459356-42459711 | 356  | 3.0 | 3.6 | 1.8 | ↑ | 1.8  | 1.5E-12 | 5.6E-09 |
| chr18:42459803-42460125 | 323  | 2.3 | 2.7 | 1.7 | ↑ | 1.1  | 4.1E-04 | 7.0E-02 |
| chr18:42461249-42461824 | 576  | 3.5 | 4.0 | 2.7 | ↑ | 1.2  | 1.8E-09 | 2.9E-06 |
| chr18:42461841-42462696 | 856  | 4.1 | 4.8 | 2.8 | ↑ | 2.0  | 2.6E-16 | 1.8E-12 |
| chr18:42465700-42465970 | 271  | 2.0 | 2.5 | 1.1 | ↑ | 1.4  | 2.4E-05 | 9.6E-03 |
| chr18:42467345-42467653 | 309  | 2.4 | 2.9 | 1.7 | ↑ | 1.1  | 6.6E-05 | 2.0E-02 |
| chr18:42471516-42471864 | 349  | 2.3 | 2.9 | 1.2 | ↑ | 1.7  | 4.7E-08 | 5.1E-05 |
| chr18:43386106-43386371 | 266  | 3.0 | 3.4 | 2.6 | ↑ | 0.8  | 6.7E-04 | 9.4E-02 |
| chr18:43446919-43447167 | 249  | 2.5 | 2.9 | 2.0 | ↑ | 1.0  | 3.4E-04 | 6.4E-02 |
| chr18:43497759-43498826 | 1068 | 4.4 | 4.0 | 4.7 | ↓ | -0.7 | 7.6E-07 | 6.0E-04 |
| chr18:4378706-4379267   | 562  | 4.5 | 4.2 | 4.8 | ↓ | -0.6 | 4.3E-04 | 7.2E-02 |
| chr18:43915415-43915732 | 318  | 3.5 | 3.2 | 3.8 | ↓ | -0.7 | 4.5E-04 | 7.2E-02 |
| chr18:44692531-44692976 | 446  | 2.7 | 3.1 | 2.1 | ↑ | 1.0  | 7.9E-05 | 2.2E-02 |
| chr18:4469364-4470256   | 893  | 4.6 | 4.4 | 4.8 | ↓ | -0.4 | 6.8E-04 | 9.4E-02 |
| chr18:4479946-4480403   | 458  | 4.0 | 3.7 | 4.3 | ↓ | -0.6 | 1.7E-04 | 4.0E-02 |
| chr18:45044808-45045111 | 304  | 2.3 | 1.5 | 2.8 | ↓ | -1.2 | 2.7E-05 | 1.0E-02 |
| chr18:46107520-46107809 | 290  | 2.8 | 2.3 | 3.2 | ↓ | -0.9 | 3.7E-04 | 6.7E-02 |
| chr18:46580213-46580575 | 363  | 4.6 | 4.3 | 4.9 | ↓ | -0.6 | 2.5E-05 | 1.0E-02 |
| chr18:46671669-46672124 | 456  | 5.3 | 5.1 | 5.5 | ↓ | -0.4 | 2.6E-05 | 1.0E-02 |
| chr18:47183962-47184388 | 427  | 3.0 | 2.3 | 3.5 | ↓ | -1.2 | 6.4E-06 | 3.3E-03 |
| chr18:47770641-47772013 | 1373 | 5.0 | 5.2 | 4.7 | ↑ | 0.5  | 3.7E-04 | 6.7E-02 |
| chr18:47772321-47773307 | 987  | 4.5 | 4.8 | 4.1 | ↑ | 0.7  | 3.7E-05 | 1.4E-02 |
| chr18:47974410-47974930 | 521  | 4.2 | 3.8 | 4.5 | ↓ | -0.7 | 1.6E-06 | 1.1E-03 |
| chr18:4801025-4801289   | 265  | 2.5 | 2.9 | 1.9 | ↑ | 1.0  | 2.1E-04 | 4.7E-02 |
| chr18:4819066-4819631   | 566  | 4.2 | 3.8 | 4.5 | ↓ | -0.7 | 2.3E-06 | 1.4E-03 |
| chr18:4819740-4821128   | 1389 | 5.8 | 5.6 | 6.0 | ↓ | -0.4 | 2.1E-06 | 1.3E-03 |

|                         |      |     |     |     |   |      |         |         |
|-------------------------|------|-----|-----|-----|---|------|---------|---------|
| chr18:48227673-48228173 | 501  | 4.2 | 3.8 | 4.5 | ↓ | -0.7 | 1.3E-06 | 9.5E-04 |
| chr18:48466345-48466833 | 489  | 3.9 | 3.6 | 4.2 | ↓ | -0.6 | 2.5E-04 | 5.3E-02 |
| chr18:48678628-48678843 | 216  | 2.5 | 1.9 | 2.9 | ↓ | -1.1 | 1.8E-04 | 4.1E-02 |
| chr18:4868498-4868715   | 218  | 2.3 | 2.7 | 1.6 | ↑ | 1.1  | 8.5E-05 | 2.3E-02 |
| chr18:49063379-49063945 | 567  | 4.6 | 4.3 | 4.9 | ↓ | -0.6 | 4.0E-05 | 1.4E-02 |
| chr18:49988798-49989474 | 677  | 4.7 | 4.5 | 5.0 | ↓ | -0.5 | 1.7E-04 | 4.0E-02 |
| chr18:50014116-50015260 | 1145 | 5.9 | 5.5 | 6.2 | ↓ | -0.7 | 7.8E-05 | 2.2E-02 |
| chr18:50016609-50017276 | 668  | 3.0 | 2.0 | 3.5 | ↓ | -1.6 | 2.8E-05 | 1.1E-02 |
| chr18:50024067-50024353 | 287  | 2.3 | 1.4 | 2.9 | ↓ | -1.5 | 1.8E-06 | 1.2E-03 |
| chr18:50028086-50028506 | 421  | 2.4 | 1.3 | 3.0 | ↓ | -1.7 | 7.6E-08 | 7.4E-05 |
| chr18:50030428-50030914 | 487  | 3.1 | 2.2 | 3.7 | ↓ | -1.5 | 7.3E-08 | 7.3E-05 |
| chr18:50031124-50031838 | 715  | 3.2 | 1.9 | 3.9 | ↓ | -2.0 | 5.0E-11 | 9.7E-08 |
| chr18:50056659-50057053 | 395  | 3.1 | 3.6 | 2.3 | ↑ | 1.2  | 3.1E-06 | 1.7E-03 |
| chr18:50057118-50057405 | 288  | 1.9 | 2.7 | 0.5 | ↑ | 2.2  | 5.6E-10 | 9.5E-07 |
| chr18:50058249-50058464 | 216  | 1.5 | 2.1 | 0.5 | ↑ | 1.6  | 1.4E-05 | 6.8E-03 |
| chr18:50058538-50058831 | 294  | 2.3 | 2.8 | 1.4 | ↑ | 1.4  | 2.3E-06 | 1.4E-03 |
| chr18:50060829-50062868 | 2040 | 6.5 | 6.7 | 6.3 | ↑ | 0.4  | 2.6E-04 | 5.4E-02 |
| chr18:50065609-50066048 | 440  | 4.1 | 4.4 | 3.6 | ↑ | 0.9  | 3.5E-04 | 6.6E-02 |
| chr18:50066403-50068266 | 1864 | 6.3 | 6.6 | 5.9 | ↑ | 0.7  | 9.0E-20 | 1.2E-15 |
| chr18:50075553-50075747 | 195  | 2.2 | 2.7 | 1.6 | ↑ | 1.1  | 2.7E-04 | 5.4E-02 |
| chr18:50077613-50078478 | 866  | 4.5 | 4.7 | 4.2 | ↑ | 0.5  | 4.8E-04 | 7.5E-02 |
| chr18:50083558-50083849 | 292  | 3.0 | 3.3 | 2.5 | ↑ | 0.9  | 1.0E-04 | 2.7E-02 |
| chr18:50086847-50087249 | 403  | 2.7 | 3.1 | 2.0 | ↑ | 1.1  | 3.6E-04 | 6.6E-02 |
| chr18:50095682-50096557 | 876  | 5.3 | 4.6 | 5.7 | ↓ | -1.1 | 9.8E-16 | 5.3E-12 |
| chr18:50134189-50134593 | 405  | 3.4 | 2.9 | 3.7 | ↓ | -0.8 | 1.9E-05 | 8.2E-03 |
| chr18:50400665-50401402 | 738  | 4.4 | 4.1 | 4.7 | ↓ | -0.6 | 9.0E-05 | 2.4E-02 |
| chr18:50688113-50688417 | 305  | 3.7 | 3.3 | 4.0 | ↓ | -0.7 | 3.8E-04 | 6.7E-02 |
| chr18:50760569-50760825 | 257  | 1.8 | 1.1 | 2.3 | ↓ | -1.2 | 5.3E-04 | 8.2E-02 |
| chr18:50809733-50810031 | 299  | 3.3 | 2.8 | 3.7 | ↓ | -0.9 | 6.2E-05 | 1.9E-02 |
| chr18:50838697-50839169 | 473  | 3.0 | 3.5 | 2.1 | ↑ | 1.4  | 1.5E-08 | 2.0E-05 |
| chr18:50840029-50840722 | 694  | 3.5 | 3.9 | 3.1 | ↑ | 0.7  | 2.5E-04 | 5.4E-02 |
| chr18:50870393-50871801 | 1409 | 5.4 | 5.6 | 5.3 | ↑ | 0.3  | 5.3E-04 | 8.2E-02 |
| chr18:50898574-50898935 | 362  | 3.8 | 3.5 | 4.1 | ↓ | -0.6 | 6.3E-04 | 9.1E-02 |
| chr18:5134945-5136315   | 1371 | 6.4 | 6.2 | 6.6 | ↓ | -0.4 | 8.6E-05 | 2.3E-02 |
| chr18:51362307-51362555 | 249  | 2.3 | 2.8 | 1.7 | ↑ | 1.0  | 2.3E-04 | 5.2E-02 |
| chr18:51400954-51401444 | 491  | 3.8 | 4.1 | 3.4 | ↑ | 0.7  | 1.8E-04 | 4.1E-02 |
| chr18:51687791-51688815 | 1025 | 5.5 | 5.7 | 5.3 | ↑ | 0.3  | 7.0E-04 | 9.6E-02 |
| chr18:52117097-52117559 | 463  | 4.1 | 3.7 | 4.4 | ↓ | -0.6 | 1.7E-04 | 4.0E-02 |
| chr18:52152596-52153319 | 724  | 4.7 | 4.4 | 4.9 | ↓ | -0.6 | 8.2E-05 | 2.2E-02 |
| chr18:52236778-52237684 | 907  | 4.6 | 4.1 | 4.9 | ↓ | -0.8 | 2.8E-05 | 1.1E-02 |
| chr18:52237746-52238307 | 562  | 3.6 | 2.9 | 4.1 | ↓ | -1.3 | 3.1E-12 | 9.2E-09 |
| chr18:52344871-52345426 | 556  | 4.3 | 3.9 | 4.6 | ↓ | -0.7 | 1.6E-05 | 7.3E-03 |
| chr18:52562102-52562401 | 300  | 3.2 | 3.6 | 2.8 | ↑ | 0.8  | 3.5E-04 | 6.6E-02 |
| chr18:5275208-5275787   | 580  | 5.5 | 5.1 | 5.9 | ↓ | -0.8 | 7.4E-12 | 1.8E-08 |
| chr18:52880175-52880407 | 233  | 2.3 | 1.3 | 2.8 | ↓ | -1.5 | 3.3E-07 | 2.7E-04 |
| chr18:53137201-53137921 | 721  | 4.9 | 4.6 | 5.2 | ↓ | -0.5 | 1.0E-04 | 2.6E-02 |
| chr18:53193163-53193480 | 318  | 3.4 | 2.7 | 3.9 | ↓ | -1.2 | 1.4E-06 | 9.9E-04 |

|                         |      |     |     |     |   |      |         |         |
|-------------------------|------|-----|-----|-----|---|------|---------|---------|
| chr18:53287823-53288049 | 227  | 2.2 | 1.4 | 2.7 | ↓ | -1.3 | 1.7E-05 | 7.4E-03 |
| chr18:53402976-53403220 | 245  | 2.4 | 2.8 | 1.8 | ↑ | 1.0  | 6.9E-04 | 9.5E-02 |
| chr18:53522780-53522943 | 164  | 2.2 | 2.6 | 1.6 | ↑ | 1.0  | 3.0E-04 | 6.0E-02 |
| chr18:53593612-53593838 | 227  | 2.9 | 2.4 | 3.3 | ↓ | -0.9 | 1.4E-04 | 3.6E-02 |
| chr18:53595642-53596471 | 830  | 4.9 | 4.7 | 5.1 | ↓ | -0.4 | 4.7E-04 | 7.4E-02 |
| chr18:53597167-53597546 | 380  | 3.4 | 3.7 | 3.0 | ↑ | 0.7  | 5.0E-04 | 7.8E-02 |
| chr18:53694314-53695397 | 1084 | 4.5 | 4.1 | 4.8 | ↓ | -0.7 | 2.5E-04 | 5.3E-02 |
| chr18:53714011-53714936 | 926  | 4.8 | 4.5 | 5.0 | ↓ | -0.5 | 7.8E-05 | 2.2E-02 |
| chr18:54277528-54278125 | 598  | 3.4 | 3.8 | 3.0 | ↑ | 0.7  | 2.5E-04 | 5.3E-02 |
| chr18:54278250-54278974 | 725  | 4.7 | 4.3 | 5.0 | ↓ | -0.8 | 2.1E-08 | 2.5E-05 |
| chr18:54358765-54359604 | 840  | 6.0 | 5.8 | 6.2 | ↓ | -0.4 | 6.5E-05 | 2.0E-02 |
| chr18:54453350-54453655 | 306  | 3.1 | 3.5 | 2.6 | ↑ | 0.8  | 3.8E-04 | 6.7E-02 |
| chr18:54474023-54474754 | 732  | 4.9 | 4.7 | 5.2 | ↓ | -0.5 | 7.1E-06 | 3.6E-03 |
| chr18:54508159-54508416 | 258  | 2.1 | 1.5 | 2.6 | ↓ | -1.0 | 5.7E-04 | 8.5E-02 |
| chr18:54508915-54509286 | 372  | 2.8 | 2.2 | 3.2 | ↓ | -0.9 | 4.5E-04 | 7.2E-02 |
| chr18:54592178-54592533 | 356  | 3.6 | 3.2 | 4.0 | ↓ | -0.8 | 3.2E-04 | 6.3E-02 |
| chr18:54852524-54852869 | 346  | 3.3 | 2.6 | 3.7 | ↓ | -1.1 | 2.5E-07 | 2.2E-04 |
| chr18:54852905-54853099 | 195  | 1.6 | 0.9 | 2.1 | ↓ | -1.2 | 6.3E-04 | 9.1E-02 |
| chr18:55266095-55266815 | 721  | 6.2 | 6.4 | 5.9 | ↑ | 0.5  | 1.3E-07 | 1.2E-04 |
| chr18:55667934-55668302 | 369  | 3.3 | 3.6 | 2.8 | ↑ | 0.8  | 5.5E-05 | 1.8E-02 |
| chr18:55754613-55755973 | 1361 | 6.8 | 6.7 | 6.9 | ↓ | -0.2 | 2.6E-04 | 5.4E-02 |
| chr18:5576039-5576374   | 336  | 4.3 | 3.7 | 4.7 | ↓ | -1.0 | 1.3E-06 | 9.5E-04 |
| chr18:57123253-57123482 | 230  | 1.6 | 2.1 | 0.9 | ↑ | 1.2  | 4.5E-04 | 7.2E-02 |
| chr18:57125894-57126107 | 214  | 2.7 | 3.0 | 2.2 | ↑ | 0.8  | 6.4E-04 | 9.2E-02 |
| chr18:57329594-57330299 | 706  | 5.7 | 5.5 | 5.9 | ↓ | -0.5 | 2.1E-08 | 2.5E-05 |
| chr18:57371843-57372177 | 335  | 3.8 | 4.2 | 3.2 | ↑ | 1.0  | 1.2E-08 | 1.7E-05 |
| chr18:57602814-57603297 | 484  | 4.1 | 4.4 | 3.8 | ↑ | 0.6  | 2.4E-04 | 5.3E-02 |
| chr18:57742561-57743103 | 543  | 5.8 | 5.7 | 6.0 | ↓ | -0.3 | 6.0E-04 | 8.8E-02 |
| chr18:57840648-57841464 | 817  | 4.5 | 4.2 | 4.8 | ↓ | -0.6 | 1.9E-05 | 8.2E-03 |
| chr18:57881383-57881842 | 460  | 4.9 | 4.6 | 5.2 | ↓ | -0.6 | 1.2E-05 | 6.0E-03 |
| chr18:5803267-5805961   | 2695 | 7.3 | 7.4 | 7.2 | ↑ | 0.2  | 1.9E-04 | 4.3E-02 |
| chr18:58132154-58132454 | 301  | 3.0 | 2.4 | 3.3 | ↓ | -0.9 | 1.4E-04 | 3.5E-02 |
| chr18:58346621-58347739 | 1119 | 6.0 | 6.1 | 5.8 | ↑ | 0.3  | 1.7E-05 | 7.6E-03 |
| chr18:58371012-58371630 | 619  | 4.5 | 4.2 | 4.8 | ↓ | -0.5 | 7.7E-05 | 2.2E-02 |
| chr18:58421566-58421987 | 422  | 5.2 | 4.7 | 5.6 | ↓ | -0.9 | 3.4E-12 | 9.3E-09 |
| chr18:58613583-58614595 | 1013 | 5.1 | 4.3 | 5.6 | ↓ | -1.3 | 8.8E-18 | 7.9E-14 |
| chr18:58684399-58684982 | 584  | 5.0 | 4.7 | 5.3 | ↓ | -0.6 | 6.3E-06 | 3.3E-03 |
| chr18:5886100-5886955   | 856  | 4.5 | 3.8 | 5.0 | ↓ | -1.2 | 7.3E-09 | 1.1E-05 |
| chr18:59182438-59182678 | 241  | 2.0 | 2.5 | 1.2 | ↑ | 1.3  | 5.6E-05 | 1.8E-02 |
| chr18:59192319-59192968 | 650  | 3.6 | 3.9 | 3.2 | ↑ | 0.7  | 6.6E-05 | 2.0E-02 |
| chr18:60011211-60011555 | 345  | 4.2 | 4.4 | 3.8 | ↑ | 0.6  | 4.4E-04 | 7.2E-02 |
| chr18:60130194-60131000 | 807  | 5.9 | 5.7 | 6.0 | ↓ | -0.3 | 2.8E-04 | 5.5E-02 |
| chr18:60193187-60193560 | 374  | 4.2 | 4.5 | 3.7 | ↑ | 0.8  | 2.2E-06 | 1.3E-03 |
| chr18:60260480-60260793 | 314  | 2.8 | 2.3 | 3.2 | ↓ | -0.9 | 3.2E-04 | 6.2E-02 |
| chr18:60346883-60348715 | 1833 | 6.0 | 5.7 | 6.2 | ↓ | -0.6 | 8.2E-09 | 1.2E-05 |
| chr18:60359334-60359725 | 392  | 5.3 | 4.9 | 5.6 | ↓ | -0.7 | 2.2E-05 | 9.2E-03 |
| chr18:60362854-60363326 | 473  | 4.3 | 4.0 | 4.6 | ↓ | -0.6 | 2.5E-05 | 9.9E-03 |

|                          |      |     |     |     |   |      |         |         |
|--------------------------|------|-----|-----|-----|---|------|---------|---------|
| chr18:60400731-60401081  | 351  | 2.6 | 2.0 | 3.0 | ↓ | -1.0 | 1.7E-04 | 4.0E-02 |
| chr18:60403307-60403715  | 409  | 3.2 | 2.6 | 3.7 | ↓ | -1.1 | 1.6E-05 | 7.3E-03 |
| chr18:60449635-60450783  | 1149 | 5.8 | 5.7 | 5.9 | ↓ | -0.3 | 4.6E-04 | 7.4E-02 |
| chr18:60593701-60593948  | 248  | 2.9 | 3.3 | 2.4 | ↑ | 0.9  | 1.1E-04 | 2.9E-02 |
| chr18:6213663-6214783    | 1121 | 5.7 | 5.3 | 5.9 | ↓ | -0.6 | 5.6E-08 | 5.8E-05 |
| chr18:6531571-6532335    | 765  | 4.6 | 4.4 | 4.8 | ↓ | -0.4 | 5.8E-04 | 8.7E-02 |
| chr18:6556729-6557377    | 649  | 5.0 | 4.8 | 5.2 | ↓ | -0.4 | 6.6E-04 | 9.4E-02 |
| chr18:6704484-6705619    | 1136 | 5.0 | 4.7 | 5.2 | ↓ | -0.5 | 5.7E-06 | 3.1E-03 |
| chr18:6712458-6713434    | 977  | 5.7 | 5.4 | 5.9 | ↓ | -0.5 | 3.6E-08 | 4.1E-05 |
| chr18:6982782-6983245    | 464  | 2.9 | 3.3 | 2.5 | ↑ | 0.8  | 7.0E-04 | 9.6E-02 |
| chr18:713304-714179      | 876  | 5.9 | 5.2 | 6.4 | ↓ | -1.1 | 2.5E-21 | 6.6E-17 |
| chr18:731180-731609      | 430  | 3.5 | 3.1 | 3.9 | ↓ | -0.7 | 4.1E-04 | 7.0E-02 |
| chr18:8089762-8090483    | 722  | 4.4 | 4.6 | 4.1 | ↑ | 0.5  | 2.7E-04 | 5.4E-02 |
| chr18:8091364-8091577    | 214  | 2.4 | 2.8 | 1.9 | ↑ | 1.0  | 4.2E-04 | 7.1E-02 |
| chr18:9210038-9210302    | 265  | 2.3 | 1.8 | 2.7 | ↓ | -0.9 | 7.3E-04 | 9.9E-02 |
| chr18:9213611-9214098    | 488  | 5.3 | 5.1 | 5.6 | ↓ | -0.5 | 5.9E-04 | 8.8E-02 |
| chr2:1004371-1009540     | 5170 | 8.2 | 8.1 | 8.3 | ↓ | -0.2 | 1.4E-04 | 3.8E-02 |
| chr2:100931936-100932173 | 238  | 2.2 | 2.7 | 1.6 | ↑ | 1.0  | 4.2E-04 | 7.7E-02 |
| chr2:101625695-101626358 | 664  | 3.4 | 2.8 | 3.7 | ↓ | -0.9 | 7.9E-06 | 4.7E-03 |
| chr2:1018903-1020629     | 1727 | 6.6 | 6.5 | 6.7 | ↓ | -0.2 | 5.0E-04 | 8.3E-02 |
| chr2:103851470-103852353 | 884  | 4.8 | 4.5 | 5.1 | ↓ | -0.6 | 2.4E-05 | 1.1E-02 |
| chr2:104345946-104346320 | 375  | 2.5 | 2.9 | 1.9 | ↑ | 0.9  | 4.2E-04 | 7.6E-02 |
| chr2:1046275-1053664     | 7390 | 9.0 | 8.9 | 9.1 | ↓ | -0.2 | 1.9E-05 | 9.0E-03 |
| chr2:105744811-105745169 | 359  | 3.1 | 2.5 | 3.6 | ↓ | -1.0 | 8.6E-07 | 7.7E-04 |
| chr2:106944019-106944803 | 785  | 4.0 | 3.2 | 4.6 | ↓ | -1.4 | 3.5E-15 | 7.9E-11 |
| chr2:106945197-106945464 | 268  | 2.2 | 1.4 | 2.7 | ↓ | -1.3 | 8.5E-05 | 2.7E-02 |
| chr2:106946447-106947023 | 577  | 3.4 | 2.9 | 3.8 | ↓ | -0.9 | 1.3E-05 | 7.0E-03 |
| chr2:106948044-106948592 | 549  | 3.6 | 2.9 | 4.0 | ↓ | -1.1 | 1.0E-08 | 1.4E-05 |
| chr2:106949938-106950666 | 729  | 2.9 | 2.2 | 3.4 | ↓ | -1.2 | 1.3E-06 | 1.1E-03 |
| chr2:106950986-106951536 | 551  | 2.5 | 1.9 | 2.9 | ↓ | -1.0 | 5.2E-04 | 8.4E-02 |
| chr2:106952240-106952793 | 554  | 2.4 | 1.7 | 2.8 | ↓ | -1.2 | 5.2E-05 | 1.9E-02 |
| chr2:106953268-106953753 | 486  | 2.9 | 2.4 | 3.2 | ↓ | -0.9 | 6.4E-04 | 9.7E-02 |
| chr2:106954226-106954588 | 363  | 2.9 | 1.6 | 3.5 | ↓ | -1.9 | 1.1E-13 | 1.0E-09 |
| chr2:107028105-107028398 | 294  | 2.2 | 1.5 | 2.6 | ↓ | -1.1 | 3.5E-04 | 6.8E-02 |
| chr2:107103889-107104221 | 333  | 2.6 | 2.1 | 3.0 | ↓ | -0.9 | 4.8E-04 | 8.1E-02 |
| chr2:107448843-107449211 | 369  | 2.9 | 3.3 | 2.3 | ↑ | 1.0  | 4.9E-05 | 1.8E-02 |
| chr2:108902577-108903358 | 782  | 3.7 | 2.8 | 4.2 | ↓ | -1.3 | 7.1E-09 | 1.1E-05 |
| chr2:109454254-109454584 | 331  | 2.7 | 2.0 | 3.1 | ↓ | -1.1 | 4.1E-05 | 1.6E-02 |
| chr2:110579539-110579845 | 307  | 3.3 | 2.7 | 3.7 | ↓ | -1.0 | 2.9E-05 | 1.2E-02 |
| chr2:110761969-110762244 | 276  | 2.5 | 1.9 | 2.9 | ↓ | -1.0 | 5.7E-04 | 8.9E-02 |
| chr2:112236205-112236602 | 398  | 2.8 | 2.0 | 3.3 | ↓ | -1.3 | 8.9E-06 | 5.0E-03 |
| chr2:112561785-112562023 | 239  | 1.5 | 2.0 | 0.6 | ↑ | 1.4  | 3.9E-04 | 7.3E-02 |
| chr2:117188437-117188779 | 343  | 2.7 | 3.2 | 2.1 | ↑ | 1.0  | 1.2E-04 | 3.5E-02 |
| chr2:11733372-11733641   | 270  | 3.3 | 2.8 | 3.6 | ↓ | -0.7 | 4.5E-04 | 7.7E-02 |
| chr2:11893807-11894388   | 582  | 2.7 | 2.2 | 3.1 | ↓ | -0.9 | 3.6E-04 | 6.9E-02 |
| chr2:121058042-121059597 | 1556 | 5.3 | 4.9 | 5.6 | ↓ | -0.7 | 1.5E-09 | 3.5E-06 |
| chr2:1215602-1217249     | 1648 | 5.8 | 5.6 | 6.0 | ↓ | -0.5 | 7.4E-05 | 2.4E-02 |

|                          |      |     |     |     |   |      |         |         |
|--------------------------|------|-----|-----|-----|---|------|---------|---------|
| chr2:1217271-1218388     | 1118 | 5.7 | 5.4 | 6.0 | ↓ | -0.6 | 5.0E-09 | 8.8E-06 |
| chr2:122434665-122435387 | 723  | 3.6 | 3.9 | 3.1 | ↑ | 0.8  | 2.9E-04 | 6.3E-02 |
| chr2:123046486-123046897 | 412  | 2.6 | 2.0 | 3.0 | ↓ | -1.0 | 1.7E-04 | 4.5E-02 |
| chr2:123722551-123722987 | 437  | 3.5 | 3.0 | 3.8 | ↓ | -0.8 | 7.1E-05 | 2.4E-02 |
| chr2:123727138-123727489 | 352  | 2.2 | 1.5 | 2.6 | ↓ | -1.1 | 4.5E-04 | 7.7E-02 |
| chr2:124197337-124197752 | 416  | 3.9 | 3.6 | 4.2 | ↓ | -0.6 | 3.5E-04 | 6.8E-02 |
| chr2:125423784-125424441 | 658  | 3.4 | 3.7 | 3.0 | ↑ | 0.7  | 5.2E-04 | 8.4E-02 |
| chr2:125991536-125991885 | 350  | 2.4 | 2.9 | 1.7 | ↑ | 1.2  | 2.4E-05 | 1.1E-02 |
| chr2:127682413-127683501 | 1089 | 4.9 | 4.5 | 5.2 | ↓ | -0.7 | 1.1E-06 | 9.2E-04 |
| chr2:127912826-127914585 | 1760 | 5.1 | 4.8 | 5.4 | ↓ | -0.6 | 4.4E-06 | 3.0E-03 |
| chr2:128888575-128889067 | 493  | 3.0 | 2.4 | 3.4 | ↓ | -1.0 | 2.9E-05 | 1.2E-02 |
| chr2:131098564-131099077 | 514  | 4.1 | 3.7 | 4.3 | ↓ | -0.6 | 1.6E-04 | 4.3E-02 |
| chr2:131433787-131434344 | 558  | 3.1 | 2.7 | 3.5 | ↓ | -0.8 | 6.1E-04 | 9.4E-02 |
| chr2:133011624-133012064 | 441  | 2.2 | 2.7 | 1.6 | ↑ | 1.0  | 4.5E-04 | 7.7E-02 |
| chr2:133033313-133033716 | 404  | 2.7 | 3.1 | 2.2 | ↑ | 1.0  | 5.2E-04 | 8.4E-02 |
| chr2:133129693-133130910 | 1218 | 6.1 | 5.9 | 6.2 | ↓ | -0.3 | 2.7E-04 | 6.0E-02 |
| chr2:133328049-133328546 | 498  | 3.5 | 3.8 | 3.1 | ↑ | 0.7  | 5.2E-04 | 8.4E-02 |
| chr2:133938847-133939814 | 968  | 3.8 | 4.1 | 3.3 | ↑ | 0.8  | 1.7E-05 | 8.2E-03 |
| chr2:133983162-133983467 | 306  | 2.1 | 1.5 | 2.6 | ↓ | -1.1 | 4.3E-04 | 7.7E-02 |
| chr2:133986996-133987419 | 424  | 2.4 | 1.6 | 2.8 | ↓ | -1.2 | 1.1E-04 | 3.3E-02 |
| chr2:134118004-134118508 | 505  | 3.6 | 3.8 | 3.2 | ↑ | 0.6  | 4.2E-04 | 7.6E-02 |
| chr2:134118630-134119352 | 723  | 4.3 | 4.5 | 4.0 | ↑ | 0.5  | 2.9E-04 | 6.3E-02 |
| chr2:134240921-134241987 | 1067 | 4.9 | 5.2 | 4.7 | ↑ | 0.4  | 9.0E-05 | 2.8E-02 |
| chr2:134256564-134256882 | 319  | 3.2 | 2.5 | 3.7 | ↓ | -1.2 | 1.5E-08 | 2.0E-05 |
| chr2:134658572-134659207 | 636  | 4.6 | 4.3 | 4.8 | ↓ | -0.5 | 5.4E-04 | 8.6E-02 |
| chr2:134878243-134878593 | 351  | 3.5 | 3.2 | 3.8 | ↓ | -0.6 | 5.7E-04 | 8.9E-02 |
| chr2:135207917-135208424 | 508  | 3.4 | 2.9 | 3.7 | ↓ | -0.8 | 6.8E-05 | 2.3E-02 |
| chr2:135469477-135469790 | 314  | 2.2 | 1.5 | 2.7 | ↓ | -1.2 | 1.3E-04 | 3.6E-02 |
| chr2:135613241-135613570 | 330  | 2.9 | 2.1 | 3.4 | ↓ | -1.3 | 1.8E-06 | 1.4E-03 |
| chr2:135616488-135617256 | 769  | 4.1 | 3.4 | 4.6 | ↓ | -1.1 | 2.3E-12 | 1.5E-08 |
| chr2:136142710-136143134 | 425  | 3.4 | 2.9 | 3.7 | ↓ | -0.8 | 4.4E-04 | 7.7E-02 |
| chr2:136295848-136298317 | 2470 | 6.3 | 6.5 | 6.2 | ↑ | 0.4  | 2.8E-04 | 6.2E-02 |
| chr2:136563439-136564094 | 656  | 4.9 | 4.2 | 5.3 | ↓ | -1.1 | 1.0E-10 | 3.6E-07 |
| chr2:136696823-136697559 | 737  | 4.8 | 4.4 | 5.2 | ↓ | -0.8 | 2.8E-06 | 2.1E-03 |
| chr2:136801557-136801849 | 293  | 2.4 | 2.9 | 1.6 | ↑ | 1.3  | 5.0E-06 | 3.3E-03 |
| chr2:136899950-136900314 | 365  | 2.9 | 3.3 | 2.4 | ↑ | 0.9  | 3.3E-04 | 6.6E-02 |
| chr2:140024617-140025251 | 635  | 2.9 | 3.3 | 2.5 | ↑ | 0.8  | 5.4E-04 | 8.6E-02 |
| chr2:140448980-140449519 | 540  | 3.9 | 3.4 | 4.2 | ↓ | -0.8 | 8.2E-06 | 4.8E-03 |
| chr2:14055076-14055777   | 702  | 3.4 | 2.8 | 3.8 | ↓ | -1.0 | 4.0E-06 | 2.8E-03 |
| chr2:14056326-14058246   | 1921 | 5.0 | 4.7 | 5.2 | ↓ | -0.5 | 2.6E-04 | 5.8E-02 |
| chr2:1407679-1408021     | 343  | 3.7 | 3.2 | 4.1 | ↓ | -0.9 | 1.0E-04 | 3.0E-02 |
| chr2:141418152-141418862 | 711  | 3.2 | 3.6 | 2.8 | ↑ | 0.8  | 5.0E-04 | 8.3E-02 |
| chr2:142242891-142243130 | 240  | 1.9 | 1.3 | 2.4 | ↓ | -1.1 | 2.9E-04 | 6.3E-02 |
| chr2:142282703-142282964 | 262  | 1.8 | 0.9 | 2.4 | ↓ | -1.5 | 3.4E-05 | 1.4E-02 |
| chr2:142794336-142794754 | 419  | 3.4 | 2.8 | 3.8 | ↓ | -1.0 | 4.1E-05 | 1.6E-02 |
| chr2:142834319-142835814 | 1496 | 5.5 | 5.3 | 5.7 | ↓ | -0.4 | 4.7E-05 | 1.7E-02 |
| chr2:143019933-143022258 | 2326 | 6.5 | 6.4 | 6.7 | ↓ | -0.3 | 2.0E-05 | 9.2E-03 |

|                          |      |     |     |     |   |      |         |         |
|--------------------------|------|-----|-----|-----|---|------|---------|---------|
| chr2:143195309-143195855 | 547  | 3.6 | 3.1 | 4.0 | ↓ | -0.9 | 2.8E-06 | 2.1E-03 |
| chr2:143392287-143392571 | 285  | 2.3 | 1.7 | 2.8 | ↓ | -1.0 | 2.3E-04 | 5.6E-02 |
| chr2:143879120-143880326 | 1207 | 5.7 | 5.4 | 5.9 | ↓ | -0.4 | 4.3E-04 | 7.7E-02 |
| chr2:143902659-143903096 | 438  | 4.0 | 3.6 | 4.2 | ↓ | -0.6 | 3.7E-04 | 7.1E-02 |
| chr2:144473655-144474079 | 425  | 5.1 | 4.9 | 5.3 | ↓ | -0.4 | 3.9E-04 | 7.3E-02 |
| chr2:145045338-145046068 | 731  | 4.8 | 4.5 | 5.0 | ↓ | -0.5 | 9.2E-05 | 2.8E-02 |
| chr2:145155320-145155761 | 442  | 3.1 | 2.6 | 3.5 | ↓ | -0.9 | 1.5E-04 | 4.1E-02 |
| chr2:145401550-145402888 | 1339 | 5.3 | 5.1 | 5.5 | ↓ | -0.4 | 2.4E-04 | 5.6E-02 |
| chr2:146805224-146805919 | 696  | 5.0 | 4.7 | 5.2 | ↓ | -0.5 | 2.6E-04 | 5.9E-02 |
| chr2:147451128-147452741 | 1614 | 5.8 | 5.5 | 6.0 | ↓ | -0.6 | 5.8E-06 | 3.5E-03 |
| chr2:147589908-147590367 | 460  | 2.9 | 3.3 | 2.4 | ↑ | 0.8  | 5.0E-04 | 8.3E-02 |
| chr2:147733166-147733868 | 703  | 3.3 | 2.9 | 3.6 | ↓ | -0.7 | 3.1E-04 | 6.6E-02 |
| chr2:147737171-147737998 | 828  | 4.4 | 4.1 | 4.6 | ↓ | -0.6 | 3.2E-05 | 1.3E-02 |
| chr2:14787265-14787594   | 330  | 3.3 | 2.8 | 3.6 | ↓ | -0.8 | 1.6E-04 | 4.3E-02 |
| chr2:148422098-148422471 | 374  | 1.9 | 2.5 | 1.0 | ↑ | 1.5  | 1.1E-05 | 6.0E-03 |
| chr2:149257321-149257732 | 412  | 3.9 | 3.5 | 4.3 | ↓ | -0.8 | 3.6E-05 | 1.4E-02 |
| chr2:149266213-149266488 | 276  | 2.3 | 1.5 | 2.8 | ↓ | -1.3 | 7.4E-06 | 4.5E-03 |
| chr2:149568346-149569717 | 1372 | 4.9 | 4.6 | 5.1 | ↓ | -0.4 | 3.5E-04 | 6.8E-02 |
| chr2:149862255-149863370 | 1116 | 4.6 | 4.3 | 4.8 | ↓ | -0.5 | 6.2E-04 | 9.6E-02 |
| chr2:149881170-149881906 | 737  | 2.9 | 3.3 | 2.4 | ↑ | 0.9  | 1.7E-04 | 4.5E-02 |
| chr2:150054437-150056637 | 2201 | 6.0 | 5.8 | 6.2 | ↓ | -0.3 | 4.8E-04 | 8.1E-02 |
| chr2:150192800-150193081 | 282  | 2.6 | 2.0 | 3.0 | ↓ | -1.0 | 1.5E-04 | 4.2E-02 |
| chr2:150481981-150482385 | 405  | 2.6 | 2.1 | 3.0 | ↓ | -0.9 | 2.8E-04 | 6.2E-02 |
| chr2:150540724-150541242 | 519  | 3.8 | 3.4 | 4.1 | ↓ | -0.7 | 6.3E-05 | 2.2E-02 |
| chr2:150623608-150625200 | 1593 | 5.6 | 5.7 | 5.4 | ↑ | 0.3  | 9.5E-05 | 2.9E-02 |
| chr2:151045-152606       | 1562 | 5.4 | 5.0 | 5.6 | ↓ | -0.6 | 5.8E-09 | 1.0E-05 |
| chr2:1512312-1512874     | 563  | 4.7 | 4.2 | 5.1 | ↓ | -0.8 | 7.0E-10 | 2.0E-06 |
| chr2:151642788-151643147 | 360  | 3.5 | 3.1 | 3.8 | ↓ | -0.7 | 5.7E-04 | 8.9E-02 |
| chr2:152996861-152997173 | 313  | 2.4 | 1.8 | 2.8 | ↓ | -1.0 | 2.5E-04 | 5.8E-02 |
| chr2:153129505-153129936 | 432  | 4.4 | 3.9 | 4.8 | ↓ | -0.9 | 2.9E-09 | 6.1E-06 |
| chr2:15385740-15386192   | 453  | 3.2 | 3.6 | 2.7 | ↑ | 0.9  | 1.0E-04 | 3.0E-02 |
| chr2:154406906-154407143 | 238  | 1.8 | 1.0 | 2.3 | ↓ | -1.3 | 2.3E-04 | 5.6E-02 |
| chr2:154422132-154423157 | 1026 | 4.7 | 4.4 | 4.9 | ↓ | -0.5 | 4.0E-04 | 7.4E-02 |
| chr2:155405387-155406055 | 669  | 3.5 | 3.8 | 3.0 | ↑ | 0.8  | 9.0E-05 | 2.8E-02 |
| chr2:156540337-156540806 | 470  | 3.7 | 3.2 | 4.0 | ↓ | -0.8 | 1.3E-05 | 6.8E-03 |
| chr2:156546451-156546862 | 412  | 3.5 | 3.1 | 3.7 | ↓ | -0.7 | 3.3E-04 | 6.6E-02 |
| chr2:15656675-15657611   | 937  | 4.1 | 3.7 | 4.3 | ↓ | -0.6 | 1.9E-04 | 4.9E-02 |
| chr2:157069855-157070840 | 986  | 4.6 | 4.2 | 4.9 | ↓ | -0.6 | 2.5E-05 | 1.1E-02 |
| chr2:157077629-157080620 | 2992 | 7.9 | 7.8 | 8.0 | ↓ | -0.2 | 1.4E-05 | 7.0E-03 |
| chr2:157373672-157374671 | 1000 | 5.4 | 5.1 | 5.6 | ↓ | -0.6 | 9.1E-06 | 5.1E-03 |
| chr2:158288832-158289045 | 214  | 2.2 | 2.6 | 1.5 | ↑ | 1.1  | 4.5E-04 | 7.7E-02 |
| chr2:15935536-15935781   | 246  | 2.5 | 3.0 | 2.0 | ↑ | 1.0  | 2.5E-04 | 5.7E-02 |
| chr2:1598601-1600735     | 2135 | 7.3 | 7.1 | 7.6 | ↓ | -0.5 | 3.4E-14 | 3.9E-10 |
| chr2:159923439-159923950 | 512  | 3.0 | 2.4 | 3.4 | ↓ | -0.9 | 9.4E-05 | 2.9E-02 |
| chr2:16006820-16007636   | 817  | 3.9 | 3.3 | 4.4 | ↓ | -1.1 | 1.0E-09 | 2.6E-06 |
| chr2:161501025-161501484 | 460  | 3.4 | 3.0 | 3.8 | ↓ | -0.8 | 1.3E-04 | 3.8E-02 |
| chr2:162290052-162291453 | 1402 | 4.9 | 5.1 | 4.7 | ↑ | 0.4  | 3.0E-04 | 6.3E-02 |

|                          |      |     |     |     |   |      |         |         |
|--------------------------|------|-----|-----|-----|---|------|---------|---------|
| chr2:162300667-162301306 | 640  | 5.9 | 5.7 | 6.1 | ↓ | -0.5 | 2.9E-09 | 6.1E-06 |
| chr2:17803374-17803777   | 404  | 3.1 | 2.5 | 3.5 | ↓ | -1.0 | 8.0E-06 | 4.7E-03 |
| chr2:18645872-18648608   | 2737 | 6.3 | 6.4 | 6.1 | ↑ | 0.4  | 1.5E-05 | 7.7E-03 |
| chr2:18943012-18943356   | 345  | 2.7 | 3.0 | 2.2 | ↑ | 0.8  | 6.3E-04 | 9.6E-02 |
| chr2:19023954-19025765   | 1812 | 5.5 | 5.3 | 5.6 | ↓ | -0.4 | 4.7E-04 | 8.0E-02 |
| chr2:19099273-19100139   | 867  | 4.3 | 4.0 | 4.6 | ↓ | -0.6 | 2.5E-04 | 5.7E-02 |
| chr2:19346739-19348089   | 1351 | 5.6 | 5.4 | 5.8 | ↓ | -0.4 | 2.0E-04 | 5.0E-02 |
| chr2:19359374-19359691   | 318  | 2.9 | 3.3 | 2.5 | ↑ | 0.8  | 3.0E-04 | 6.3E-02 |
| chr2:19411941-19413149   | 1209 | 5.4 | 5.1 | 5.6 | ↓ | -0.6 | 9.8E-09 | 1.4E-05 |
| chr2:19947357-19948052   | 696  | 3.5 | 3.8 | 3.0 | ↑ | 0.8  | 2.0E-04 | 5.0E-02 |
| chr2:2041255-2042434     | 1180 | 4.4 | 4.7 | 4.1 | ↑ | 0.7  | 4.3E-06 | 3.0E-03 |
| chr2:2042506-2045275     | 2770 | 6.8 | 6.7 | 6.9 | ↓ | -0.2 | 9.8E-05 | 3.0E-02 |
| chr2:21320997-21322741   | 1745 | 5.5 | 5.2 | 5.7 | ↓ | -0.5 | 1.7E-04 | 4.5E-02 |
| chr2:21554186-21554563   | 378  | 3.2 | 3.6 | 2.5 | ↑ | 1.1  | 1.3E-06 | 1.1E-03 |
| chr2:21618208-21618480   | 273  | 2.1 | 0.7 | 2.8 | ↓ | -2.1 | 3.5E-10 | 1.1E-06 |
| chr2:22296684-22297212   | 529  | 4.7 | 4.4 | 5.0 | ↓ | -0.6 | 4.5E-04 | 7.7E-02 |
| chr2:22337571-22338286   | 716  | 4.3 | 3.7 | 4.7 | ↓ | -1.0 | 5.0E-06 | 3.3E-03 |
| chr2:22714465-22714829   | 365  | 3.0 | 2.5 | 3.3 | ↓ | -0.8 | 3.9E-04 | 7.3E-02 |
| chr2:25767974-25768360   | 387  | 2.8 | 3.2 | 2.3 | ↑ | 0.9  | 3.3E-04 | 6.6E-02 |
| chr2:2584508-2585137     | 630  | 3.7 | 3.1 | 4.2 | ↓ | -1.1 | 6.1E-09 | 1.0E-05 |
| chr2:26824348-26825801   | 1454 | 5.4 | 5.2 | 5.5 | ↓ | -0.4 | 5.0E-04 | 8.3E-02 |
| chr2:26883114-26883854   | 741  | 4.7 | 4.3 | 4.9 | ↓ | -0.6 | 3.2E-04 | 6.6E-02 |
| chr2:27425283-27426244   | 962  | 4.0 | 3.5 | 4.4 | ↓ | -0.9 | 5.0E-06 | 3.3E-03 |
| chr2:27700719-27702094   | 1376 | 5.1 | 4.3 | 5.6 | ↓ | -1.3 | 5.8E-11 | 2.4E-07 |
| chr2:28691218-28691586   | 369  | 3.0 | 2.5 | 3.3 | ↓ | -0.9 | 2.0E-04 | 4.9E-02 |
| chr2:29013246-29014034   | 789  | 4.4 | 4.7 | 4.1 | ↑ | 0.6  | 2.3E-04 | 5.5E-02 |
| chr2:2919959-2920888     | 930  | 5.3 | 5.1 | 5.5 | ↓ | -0.4 | 1.0E-04 | 3.0E-02 |
| chr2:29398201-29399108   | 908  | 3.7 | 3.4 | 4.0 | ↓ | -0.6 | 6.1E-04 | 9.4E-02 |
| chr2:29502281-29502678   | 398  | 3.2 | 2.9 | 3.5 | ↓ | -0.7 | 5.3E-04 | 8.5E-02 |
| chr2:29886246-29886561   | 316  | 2.6 | 2.1 | 3.0 | ↓ | -1.0 | 2.2E-04 | 5.4E-02 |
| chr2:30159134-30159381   | 248  | 3.0 | 3.4 | 2.5 | ↑ | 0.8  | 4.3E-04 | 7.7E-02 |
| chr2:30192461-30192730   | 270  | 2.1 | 1.5 | 2.6 | ↓ | -1.1 | 4.5E-04 | 7.7E-02 |
| chr2:30793729-30794173   | 445  | 4.4 | 4.1 | 4.7 | ↓ | -0.5 | 3.7E-04 | 7.1E-02 |
| chr2:31317137-31317540   | 404  | 3.8 | 3.4 | 4.1 | ↓ | -0.7 | 9.6E-05 | 2.9E-02 |
| chr2:3202995-3204445     | 1451 | 5.6 | 5.8 | 5.5 | ↑ | 0.3  | 1.9E-04 | 4.9E-02 |
| chr2:32245902-32246341   | 440  | 3.6 | 3.9 | 3.2 | ↑ | 0.7  | 2.2E-05 | 1.0E-02 |
| chr2:32531093-32531555   | 463  | 4.5 | 4.1 | 4.9 | ↓ | -0.8 | 5.0E-07 | 4.9E-04 |
| chr2:32543451-32543862   | 412  | 2.2 | 1.3 | 2.8 | ↓ | -1.5 | 2.1E-06 | 1.6E-03 |
| chr2:32644031-32644696   | 666  | 3.6 | 3.1 | 3.9 | ↓ | -0.8 | 1.5E-05 | 7.7E-03 |
| chr2:32647429-32647735   | 307  | 2.7 | 2.1 | 3.2 | ↓ | -1.1 | 1.3E-05 | 7.0E-03 |
| chr2:32658227-32660148   | 1922 | 5.1 | 4.8 | 5.4 | ↓ | -0.6 | 1.7E-05 | 8.2E-03 |
| chr2:3336032-3337336     | 1305 | 5.7 | 5.5 | 5.8 | ↓ | -0.3 | 6.5E-04 | 9.8E-02 |
| chr2:33756047-33756468   | 422  | 4.4 | 4.1 | 4.6 | ↓ | -0.5 | 2.7E-04 | 6.1E-02 |
| chr2:3417865-3421228     | 3364 | 7.0 | 6.8 | 7.2 | ↓ | -0.4 | 6.3E-05 | 2.2E-02 |
| chr2:35308452-35308678   | 227  | 2.2 | 2.7 | 1.5 | ↑ | 1.2  | 3.8E-05 | 1.5E-02 |
| chr2:35456452-35457412   | 961  | 4.2 | 3.7 | 4.6 | ↓ | -0.9 | 2.0E-07 | 2.1E-04 |
| chr2:35511432-35511755   | 324  | 2.2 | 2.7 | 1.6 | ↑ | 1.1  | 2.4E-04 | 5.7E-02 |



|                        |      |     |     |     |   |      |         |         |
|------------------------|------|-----|-----|-----|---|------|---------|---------|
| chr2:35699209-35700595 | 1387 | 5.4 | 5.2 | 5.7 | ↓ | -0.5 | 4.4E-08 | 5.0E-05 |
| chr2:35742054-35742354 | 301  | 2.2 | 1.6 | 2.7 | ↓ | -1.1 | 1.4E-04 | 3.8E-02 |
| chr2:35744958-35745477 | 520  | 3.5 | 2.7 | 4.0 | ↓ | -1.3 | 7.3E-11 | 2.8E-07 |
| chr2:35757055-35757332 | 278  | 2.3 | 1.5 | 2.8 | ↓ | -1.3 | 2.9E-05 | 1.2E-02 |
| chr2:35757367-35759277 | 1911 | 5.3 | 4.8 | 5.7 | ↓ | -0.9 | 3.7E-13 | 2.8E-09 |
| chr2:35766177-35766791 | 615  | 4.6 | 4.3 | 4.9 | ↓ | -0.6 | 2.0E-04 | 5.0E-02 |
| chr2:35768583-35771232 | 2650 | 6.3 | 6.0 | 6.6 | ↓ | -0.6 | 2.3E-11 | 1.1E-07 |
| chr2:35773142-35774949 | 1808 | 6.0 | 5.7 | 6.3 | ↓ | -0.5 | 3.7E-12 | 2.1E-08 |
| chr2:35880545-35880925 | 381  | 2.4 | 1.8 | 2.8 | ↓ | -1.0 | 3.3E-04 | 6.6E-02 |
| chr2:35883330-35884258 | 929  | 4.1 | 3.7 | 4.4 | ↓ | -0.7 | 3.2E-05 | 1.3E-02 |
| chr2:36007794-36008162 | 369  | 3.7 | 3.2 | 4.1 | ↓ | -0.9 | 8.6E-06 | 4.9E-03 |
| chr2:36067687-36068605 | 919  | 4.0 | 3.1 | 4.6 | ↓ | -1.5 | 3.0E-14 | 3.9E-10 |
| chr2:36143816-36144099 | 284  | 1.9 | 2.4 | 0.9 | ↑ | 1.6  | 5.4E-06 | 3.4E-03 |
| chr2:42138681-42139019 | 339  | 2.8 | 2.3 | 3.2 | ↓ | -0.9 | 3.0E-04 | 6.3E-02 |
| chr2:42235928-42237273 | 1346 | 4.2 | 3.7 | 4.6 | ↓ | -0.9 | 4.7E-06 | 3.2E-03 |
| chr2:42331250-42332004 | 755  | 4.8 | 5.0 | 4.5 | ↑ | 0.5  | 5.2E-04 | 8.4E-02 |
| chr2:4246273-4246655   | 383  | 3.1 | 3.4 | 2.6 | ↑ | 0.9  | 4.9E-04 | 8.2E-02 |
| chr2:42564078-42564954 | 877  | 4.5 | 4.2 | 4.7 | ↓ | -0.5 | 1.4E-04 | 3.8E-02 |
| chr2:42735551-42736451 | 901  | 4.5 | 4.2 | 4.8 | ↓ | -0.6 | 5.5E-05 | 2.0E-02 |
| chr2:42855748-42856606 | 859  | 4.3 | 4.5 | 4.0 | ↑ | 0.6  | 4.3E-04 | 7.7E-02 |
| chr2:42885524-42886070 | 547  | 3.0 | 3.6 | 2.1 | ↑ | 1.4  | 3.6E-09 | 7.2E-06 |
| chr2:42892106-42892604 | 499  | 2.8 | 3.1 | 2.3 | ↑ | 0.9  | 3.5E-04 | 6.8E-02 |
| chr2:42910885-42911520 | 636  | 3.3 | 3.6 | 2.8 | ↑ | 0.8  | 7.0E-05 | 2.4E-02 |
| chr2:42913944-42915802 | 1859 | 4.7 | 5.0 | 4.3 | ↑ | 0.7  | 1.4E-06 | 1.1E-03 |
| chr2:42917966-42918367 | 402  | 3.3 | 3.6 | 2.8 | ↑ | 0.8  | 2.8E-04 | 6.2E-02 |
| chr2:43516423-43517023 | 601  | 5.5 | 5.3 | 5.7 | ↓ | -0.4 | 7.2E-05 | 2.4E-02 |
| chr2:44293954-44294523 | 570  | 2.9 | 2.3 | 3.2 | ↓ | -0.9 | 1.1E-04 | 3.3E-02 |
| chr2:44378960-44380462 | 1503 | 4.9 | 5.1 | 4.6 | ↑ | 0.5  | 1.3E-05 | 7.0E-03 |
| chr2:44451495-44453307 | 1813 | 4.9 | 5.1 | 4.7 | ↑ | 0.4  | 1.0E-04 | 3.0E-02 |
| chr2:44495139-44495814 | 676  | 3.7 | 3.3 | 4.1 | ↓ | -0.7 | 1.7E-05 | 8.2E-03 |
| chr2:44697555-44698160 | 606  | 4.0 | 3.6 | 4.2 | ↓ | -0.6 | 2.5E-04 | 5.8E-02 |
| chr2:46236094-46237390 | 1297 | 5.7 | 5.4 | 5.9 | ↓ | -0.5 | 2.4E-07 | 2.4E-04 |
| chr2:46492295-46492697 | 403  | 4.0 | 3.5 | 4.4 | ↓ | -0.9 | 1.7E-05 | 8.2E-03 |
| chr2:47179112-47179859 | 748  | 4.1 | 3.8 | 4.4 | ↓ | -0.6 | 4.6E-05 | 1.7E-02 |
| chr2:48607134-48607717 | 584  | 2.9 | 3.3 | 2.2 | ↑ | 1.1  | 5.1E-06 | 3.3E-03 |
| chr2:50076388-50079781 | 3394 | 7.2 | 7.1 | 7.4 | ↓ | -0.3 | 2.9E-04 | 6.3E-02 |
| chr2:50097530-50097945 | 416  | 4.1 | 3.5 | 4.6 | ↓ | -1.1 | 1.3E-08 | 1.8E-05 |
| chr2:50251133-50252467 | 1335 | 4.7 | 4.9 | 4.4 | ↑ | 0.5  | 3.0E-05 | 1.2E-02 |
| chr2:50492272-50492870 | 599  | 5.4 | 5.1 | 5.7 | ↓ | -0.5 | 7.4E-07 | 6.8E-04 |
| chr2:50549581-50550038 | 458  | 3.5 | 3.1 | 3.8 | ↓ | -0.7 | 4.9E-04 | 8.2E-02 |
| chr2:51811636-51812022 | 387  | 3.8 | 4.1 | 3.4 | ↑ | 0.8  | 2.6E-05 | 1.2E-02 |
| chr2:51816323-51816803 | 481  | 3.4 | 2.9 | 3.8 | ↓ | -1.0 | 1.7E-06 | 1.4E-03 |
| chr2:52551700-52552176 | 477  | 3.9 | 3.6 | 4.2 | ↓ | -0.6 | 4.2E-04 | 7.7E-02 |
| chr2:52575975-52577447 | 1473 | 5.9 | 5.5 | 6.2 | ↓ | -0.7 | 9.4E-06 | 5.2E-03 |
| chr2:53133780-53134063 | 284  | 2.9 | 2.4 | 3.2 | ↓ | -0.9 | 1.3E-04 | 3.7E-02 |
| chr2:53917041-53917570 | 530  | 3.5 | 3.0 | 3.9 | ↓ | -0.8 | 5.2E-04 | 8.4E-02 |
| chr2:5488993-5491727   | 2735 | 6.4 | 6.2 | 6.5 | ↓ | -0.3 | 3.6E-06 | 2.6E-03 |

|                        |      |     |     |     |   |      |         |         |
|------------------------|------|-----|-----|-----|---|------|---------|---------|
| chr2:559893-560729     | 837  | 4.8 | 5.0 | 4.6 | ↑ | 0.5  | 2.1E-04 | 5.1E-02 |
| chr2:5850286-5850657   | 372  | 3.0 | 2.5 | 3.4 | ↓ | -0.8 | 5.1E-04 | 8.4E-02 |
| chr2:58949200-58949697 | 498  | 2.8 | 3.2 | 2.4 | ↑ | 0.8  | 6.5E-04 | 9.8E-02 |
| chr2:59530316-59530775 | 460  | 3.3 | 3.6 | 2.9 | ↑ | 0.7  | 2.1E-04 | 5.1E-02 |
| chr2:60844875-60845153 | 279  | 2.4 | 1.5 | 2.9 | ↓ | -1.5 | 1.2E-06 | 1.1E-03 |
| chr2:6101907-6103370   | 1464 | 5.1 | 4.7 | 5.3 | ↓ | -0.6 | 4.3E-05 | 1.6E-02 |
| chr2:6266278-6268249   | 1972 | 5.8 | 5.6 | 6.0 | ↓ | -0.4 | 2.7E-05 | 1.2E-02 |
| chr2:6282481-6282749   | 269  | 3.0 | 3.3 | 2.6 | ↑ | 0.8  | 4.0E-04 | 7.4E-02 |
| chr2:6445188-6446971   | 1784 | 5.7 | 5.4 | 5.9 | ↓ | -0.4 | 2.8E-07 | 2.8E-04 |
| chr2:65766032-65766417 | 386  | 2.2 | 1.6 | 2.7 | ↓ | -1.1 | 4.4E-04 | 7.7E-02 |
| chr2:65948583-65949188 | 606  | 2.9 | 3.3 | 2.5 | ↑ | 0.8  | 5.7E-04 | 8.9E-02 |
| chr2:6622119-6623322   | 1204 | 4.5 | 4.2 | 4.7 | ↓ | -0.6 | 1.2E-05 | 6.5E-03 |
| chr2:66397804-66398192 | 389  | 2.9 | 2.4 | 3.3 | ↓ | -1.0 | 2.7E-05 | 1.2E-02 |
| chr2:6639932-6640554   | 623  | 4.1 | 3.7 | 4.4 | ↓ | -0.8 | 5.7E-07 | 5.5E-04 |
| chr2:66402031-66402806 | 776  | 3.8 | 3.5 | 4.1 | ↓ | -0.6 | 3.2E-04 | 6.6E-02 |
| chr2:67379174-67379717 | 544  | 3.8 | 3.4 | 4.1 | ↓ | -0.7 | 2.5E-04 | 5.7E-02 |
| chr2:684415-686013     | 1599 | 6.3 | 6.1 | 6.5 | ↓ | -0.4 | 8.7E-07 | 7.7E-04 |
| chr2:6866828-6867211   | 384  | 3.8 | 3.5 | 4.1 | ↓ | -0.7 | 4.4E-04 | 7.7E-02 |
| chr2:69767905-69768705 | 801  | 4.1 | 3.7 | 4.4 | ↓ | -0.6 | 6.7E-05 | 2.3E-02 |
| chr2:69846710-69847080 | 371  | 2.0 | 2.5 | 1.3 | ↑ | 1.2  | 2.4E-04 | 5.6E-02 |
| chr2:70088967-70089489 | 523  | 3.4 | 3.7 | 3.0 | ↑ | 0.7  | 3.2E-04 | 6.6E-02 |
| chr2:70195827-70196257 | 431  | 3.6 | 3.0 | 4.0 | ↓ | -1.0 | 1.0E-07 | 1.1E-04 |
| chr2:70357909-70358873 | 965  | 4.4 | 4.7 | 4.0 | ↑ | 0.6  | 2.1E-04 | 5.1E-02 |
| chr2:7050881-7051379   | 499  | 3.2 | 3.5 | 2.7 | ↑ | 0.9  | 4.2E-05 | 1.6E-02 |
| chr2:71166145-71167025 | 881  | 4.0 | 3.2 | 4.5 | ↓ | -1.3 | 7.6E-10 | 2.1E-06 |
| chr2:71527722-71528234 | 513  | 2.7 | 2.2 | 3.1 | ↓ | -0.9 | 5.7E-04 | 8.9E-02 |
| chr2:71871465-71871828 | 364  | 2.2 | 1.6 | 2.6 | ↓ | -1.0 | 5.5E-04 | 8.6E-02 |
| chr2:72288353-72289141 | 789  | 3.8 | 4.1 | 3.4 | ↑ | 0.8  | 2.0E-04 | 5.0E-02 |
| chr2:72458726-72458981 | 256  | 1.9 | 1.1 | 2.4 | ↓ | -1.3 | 7.1E-05 | 2.4E-02 |
| chr2:73449079-73449539 | 461  | 4.4 | 4.6 | 4.2 | ↑ | 0.4  | 6.5E-04 | 9.8E-02 |
| chr2:75296424-75296855 | 432  | 3.9 | 3.5 | 4.2 | ↓ | -0.7 | 7.9E-05 | 2.6E-02 |
| chr2:75357333-75357894 | 562  | 5.1 | 4.9 | 5.3 | ↓ | -0.4 | 1.8E-04 | 4.6E-02 |
| chr2:75478160-75478664 | 505  | 2.9 | 2.3 | 3.4 | ↓ | -1.1 | 1.6E-05 | 7.9E-03 |
| chr2:75814645-75814865 | 221  | 2.0 | 1.2 | 2.5 | ↓ | -1.3 | 6.6E-05 | 2.3E-02 |
| chr2:75841995-75842566 | 572  | 4.3 | 4.6 | 4.0 | ↑ | 0.6  | 3.9E-04 | 7.3E-02 |
| chr2:75906693-75907468 | 776  | 4.2 | 4.4 | 3.8 | ↑ | 0.6  | 4.7E-05 | 1.7E-02 |
| chr2:75914557-75915930 | 1374 | 6.6 | 6.8 | 6.4 | ↑ | 0.4  | 3.2E-04 | 6.6E-02 |
| chr2:75982486-75982915 | 430  | 1.8 | 2.4 | 1.0 | ↑ | 1.3  | 7.9E-05 | 2.6E-02 |
| chr2:77148643-77150650 | 2008 | 5.7 | 5.4 | 5.9 | ↓ | -0.5 | 3.6E-08 | 4.2E-05 |
| chr2:77335809-77336398 | 590  | 3.4 | 3.7 | 3.0 | ↑ | 0.7  | 5.0E-04 | 8.3E-02 |
| chr2:77687935-77690178 | 2244 | 6.2 | 6.0 | 6.3 | ↓ | -0.3 | 2.1E-05 | 9.5E-03 |
| chr2:77846120-77846773 | 654  | 4.4 | 3.8 | 4.8 | ↓ | -1.0 | 5.6E-08 | 6.3E-05 |
| chr2:7785053-7785685   | 633  | 2.6 | 3.0 | 2.1 | ↑ | 0.9  | 4.3E-04 | 7.7E-02 |
| chr2:79488885-79490869 | 1985 | 7.2 | 6.9 | 7.4 | ↓ | -0.5 | 4.6E-16 | 2.1E-11 |
| chr2:79769142-79769854 | 713  | 4.0 | 3.6 | 4.2 | ↓ | -0.6 | 8.1E-05 | 2.6E-02 |
| chr2:79796019-79796570 | 552  | 3.6 | 3.2 | 3.8 | ↓ | -0.6 | 3.4E-04 | 6.8E-02 |
| chr2:80770396-80770926 | 531  | 4.4 | 3.9 | 4.8 | ↓ | -0.9 | 7.3E-09 | 1.1E-05 |

|                          |      |     |     |     |   |      |         |         |
|--------------------------|------|-----|-----|-----|---|------|---------|---------|
| chr2:81134089-81134518   | 430  | 3.0 | 3.3 | 2.5 | ↑ | 0.9  | 3.3E-04 | 6.6E-02 |
| chr2:8152039-8152990     | 952  | 5.2 | 4.9 | 5.4 | ↓ | -0.4 | 8.9E-05 | 2.8E-02 |
| chr2:82172796-82173255   | 460  | 3.3 | 3.7 | 2.9 | ↑ | 0.7  | 4.5E-04 | 7.7E-02 |
| chr2:82286579-82287938   | 1360 | 5.8 | 5.4 | 6.1 | ↓ | -0.6 | 2.2E-08 | 2.7E-05 |
| chr2:82750010-82750373   | 364  | 3.4 | 2.7 | 3.9 | ↓ | -1.1 | 2.8E-08 | 3.4E-05 |
| chr2:82791139-82791920   | 782  | 4.6 | 4.2 | 5.0 | ↓ | -0.8 | 1.8E-08 | 2.4E-05 |
| chr2:84790509-84790979   | 471  | 4.4 | 3.4 | 5.0 | ↓ | -1.6 | 1.3E-11 | 6.4E-08 |
| chr2:84791426-84793307   | 1882 | 5.3 | 5.5 | 5.0 | ↑ | 0.5  | 5.6E-05 | 2.0E-02 |
| chr2:84901382-84901942   | 561  | 3.7 | 3.3 | 4.0 | ↓ | -0.7 | 2.9E-04 | 6.3E-02 |
| chr2:84971290-84971784   | 495  | 3.6 | 3.1 | 3.9 | ↓ | -0.8 | 4.2E-05 | 1.6E-02 |
| chr2:84971806-84972158   | 353  | 2.6 | 1.6 | 3.2 | ↓ | -1.7 | 4.5E-09 | 8.3E-06 |
| chr2:84997484-84999100   | 1617 | 5.9 | 5.7 | 6.0 | ↓ | -0.4 | 3.8E-04 | 7.1E-02 |
| chr2:85005700-85007528   | 1829 | 5.6 | 5.2 | 5.9 | ↓ | -0.7 | 7.6E-09 | 1.1E-05 |
| chr2:85007729-85009069   | 1341 | 5.3 | 4.8 | 5.7 | ↓ | -0.9 | 1.1E-09 | 2.7E-06 |
| chr2:85011204-85012003   | 800  | 4.0 | 3.5 | 4.3 | ↓ | -0.8 | 5.4E-06 | 3.4E-03 |
| chr2:85056879-85057242   | 364  | 2.2 | 1.5 | 2.6 | ↓ | -1.0 | 3.8E-04 | 7.2E-02 |
| chr2:85118782-85119401   | 620  | 4.0 | 3.4 | 4.4 | ↓ | -0.9 | 1.4E-07 | 1.5E-04 |
| chr2:85123094-85123383   | 290  | 2.4 | 1.9 | 2.8 | ↓ | -0.9 | 6.6E-04 | 1.0E-01 |
| chr2:85280865-85281286   | 422  | 3.0 | 2.3 | 3.5 | ↓ | -1.2 | 7.2E-07 | 6.8E-04 |
| chr2:85281894-85282627   | 734  | 2.9 | 2.4 | 3.3 | ↓ | -0.9 | 3.3E-04 | 6.6E-02 |
| chr2:85952929-85953393   | 465  | 3.9 | 3.5 | 4.2 | ↓ | -0.7 | 1.0E-04 | 3.0E-02 |
| chr2:86851800-86852293   | 494  | 4.0 | 3.3 | 4.4 | ↓ | -1.1 | 3.9E-10 | 1.2E-06 |
| chr2:8762891-8763392     | 502  | 4.0 | 3.6 | 4.2 | ↓ | -0.6 | 2.8E-04 | 6.2E-02 |
| chr2:87840615-87841256   | 642  | 3.6 | 3.2 | 3.9 | ↓ | -0.7 | 3.3E-04 | 6.6E-02 |
| chr2:88884359-88884927   | 569  | 2.6 | 1.9 | 3.1 | ↓ | -1.3 | 1.8E-06 | 1.4E-03 |
| chr2:88886231-88887447   | 1217 | 4.7 | 4.5 | 4.9 | ↓ | -0.4 | 3.3E-04 | 6.6E-02 |
| chr2:88903245-88903987   | 743  | 5.2 | 5.0 | 5.4 | ↓ | -0.4 | 1.8E-04 | 4.6E-02 |
| chr2:89364758-89365136   | 379  | 3.3 | 2.9 | 3.7 | ↓ | -0.8 | 3.4E-04 | 6.8E-02 |
| chr2:9023048-9023537     | 490  | 2.7 | 2.2 | 3.1 | ↓ | -0.9 | 2.7E-04 | 6.0E-02 |
| chr2:91561189-91562435   | 1247 | 4.9 | 4.6 | 5.1 | ↓ | -0.5 | 7.6E-05 | 2.5E-02 |
| chr2:92737005-92737976   | 972  | 4.8 | 4.4 | 5.2 | ↓ | -0.8 | 4.3E-09 | 8.3E-06 |
| chr2:93524199-93524592   | 394  | 2.7 | 3.1 | 2.2 | ↑ | 0.9  | 3.4E-04 | 6.7E-02 |
| chr2:93768174-93768583   | 410  | 2.1 | 1.5 | 2.6 | ↓ | -1.2 | 8.2E-05 | 2.6E-02 |
| chr2:93783277-93783702   | 426  | 2.2 | 1.4 | 2.6 | ↓ | -1.2 | 4.5E-05 | 1.7E-02 |
| chr2:9396978-9398049     | 1072 | 4.3 | 4.0 | 4.5 | ↓ | -0.5 | 1.9E-04 | 4.9E-02 |
| chr2:94117611-94117974   | 364  | 2.2 | 2.6 | 1.5 | ↑ | 1.1  | 5.3E-04 | 8.5E-02 |
| chr2:9481814-9482389     | 576  | 5.1 | 4.8 | 5.2 | ↓ | -0.4 | 6.3E-04 | 9.6E-02 |
| chr2:9583395-9583989     | 595  | 3.9 | 3.6 | 4.2 | ↓ | -0.6 | 4.2E-04 | 7.6E-02 |
| chr2:9584744-9586956     | 2213 | 6.0 | 5.8 | 6.1 | ↓ | -0.4 | 1.9E-04 | 4.9E-02 |
| chr2:98206691-98207088   | 398  | 1.9 | 2.4 | 1.3 | ↑ | 1.1  | 4.8E-04 | 8.1E-02 |
| chr2:98828087-98828735   | 649  | 3.4 | 3.7 | 2.9 | ↑ | 0.7  | 1.7E-04 | 4.5E-02 |
| chr3:100177111-100177406 | 296  | 2.5 | 1.9 | 2.9 | ↓ | -1.0 | 2.9E-04 | 5.5E-02 |
| chr3:100972068-100972690 | 623  | 4.2 | 3.7 | 4.6 | ↓ | -0.8 | 2.7E-08 | 3.3E-05 |
| chr3:101119219-101119930 | 712  | 4.7 | 4.4 | 5.0 | ↓ | -0.7 | 1.1E-05 | 4.9E-03 |
| chr3:101121476-101121994 | 519  | 3.2 | 2.6 | 3.6 | ↓ | -0.9 | 5.5E-04 | 8.1E-02 |
| chr3:101122190-101122502 | 313  | 2.7 | 1.8 | 3.3 | ↓ | -1.4 | 4.1E-08 | 4.8E-05 |
| chr3:101174992-101175245 | 254  | 1.8 | 1.1 | 2.3 | ↓ | -1.3 | 1.7E-04 | 4.0E-02 |

|                          |      |     |     |     |   |      |         |         |
|--------------------------|------|-----|-----|-----|---|------|---------|---------|
| chr3:101218001-101218227 | 227  | 2.8 | 2.2 | 3.2 | ↓ | -1.0 | 6.6E-05 | 1.9E-02 |
| chr3:101223254-101224414 | 1161 | 7.1 | 6.6 | 7.4 | ↓ | -0.8 | 2.5E-09 | 3.7E-06 |
| chr3:101225217-101225752 | 536  | 3.9 | 3.5 | 4.2 | ↓ | -0.7 | 1.6E-04 | 3.7E-02 |
| chr3:101292941-101293278 | 338  | 3.6 | 4.0 | 3.1 | ↑ | 0.8  | 1.8E-04 | 4.1E-02 |
| chr3:101321505-101321724 | 220  | 2.0 | 2.4 | 1.3 | ↑ | 1.2  | 3.8E-04 | 6.6E-02 |
| chr3:101423178-101424303 | 1126 | 4.4 | 4.7 | 4.1 | ↑ | 0.6  | 5.8E-05 | 1.8E-02 |
| chr3:101440098-101441448 | 1351 | 5.6 | 5.9 | 5.0 | ↑ | 0.9  | 1.7E-10 | 4.2E-07 |
| chr3:101450455-101450937 | 483  | 3.9 | 3.6 | 4.2 | ↓ | -0.7 | 7.5E-04 | 9.6E-02 |
| chr3:101452219-101452449 | 231  | 2.0 | 2.4 | 1.3 | ↑ | 1.1  | 7.7E-04 | 9.8E-02 |
| chr3:101502161-101503148 | 988  | 5.0 | 5.5 | 4.1 | ↑ | 1.4  | 4.2E-11 | 1.2E-07 |
| chr3:101503180-101504772 | 1593 | 5.2 | 5.8 | 4.3 | ↑ | 1.5  | 1.8E-16 | 1.4E-12 |
| chr3:101504957-101505473 | 517  | 2.9 | 3.3 | 2.3 | ↑ | 1.0  | 1.1E-05 | 4.9E-03 |
| chr3:101505627-101506088 | 462  | 3.9 | 4.3 | 3.5 | ↑ | 0.7  | 5.3E-04 | 7.9E-02 |
| chr3:101506651-101507460 | 810  | 4.7 | 5.1 | 4.0 | ↑ | 1.1  | 7.9E-15 | 4.7E-11 |
| chr3:101507465-101509426 | 1962 | 6.5 | 7.0 | 5.9 | ↑ | 1.0  | 5.4E-12 | 1.7E-08 |
| chr3:101510090-101510997 | 908  | 4.3 | 4.6 | 3.9 | ↑ | 0.7  | 8.6E-05 | 2.4E-02 |
| chr3:101514259-101514689 | 431  | 3.8 | 4.1 | 3.4 | ↑ | 0.7  | 5.0E-05 | 1.6E-02 |
| chr3:101515184-101516132 | 949  | 4.7 | 5.1 | 4.1 | ↑ | 1.0  | 1.2E-09 | 2.1E-06 |
| chr3:1020038-1021197     | 1160 | 6.8 | 6.6 | 7.0 | ↓ | -0.3 | 3.1E-04 | 5.8E-02 |
| chr3:102547467-102547621 | 155  | 1.6 | 2.1 | 0.8 | ↑ | 1.2  | 5.9E-04 | 8.5E-02 |
| chr3:102942209-102942460 | 252  | 2.5 | 1.8 | 2.9 | ↓ | -1.1 | 7.1E-05 | 2.1E-02 |
| chr3:102942521-102943187 | 667  | 3.1 | 2.5 | 3.5 | ↓ | -1.0 | 3.6E-06 | 2.0E-03 |
| chr3:103116702-103116903 | 202  | 2.0 | 1.4 | 2.5 | ↓ | -1.1 | 3.7E-04 | 6.5E-02 |
| chr3:103313684-103314266 | 583  | 3.5 | 3.1 | 3.8 | ↓ | -0.7 | 7.2E-04 | 9.4E-02 |
| chr3:103391371-103392630 | 1260 | 4.8 | 4.6 | 5.0 | ↓ | -0.4 | 3.1E-04 | 5.8E-02 |
| chr3:103514862-103516420 | 1559 | 5.0 | 4.8 | 5.2 | ↓ | -0.4 | 7.2E-04 | 9.4E-02 |
| chr3:103967747-103968200 | 454  | 2.9 | 2.4 | 3.2 | ↓ | -0.8 | 6.0E-04 | 8.5E-02 |
| chr3:10408251-10408731   | 481  | 3.8 | 3.5 | 4.1 | ↓ | -0.7 | 6.0E-04 | 8.5E-02 |
| chr3:104319988-104320546 | 559  | 3.1 | 2.6 | 3.5 | ↓ | -0.9 | 5.6E-05 | 1.7E-02 |
| chr3:104329800-104331004 | 1205 | 4.9 | 4.6 | 5.1 | ↓ | -0.5 | 3.5E-05 | 1.2E-02 |
| chr3:104334037-104334851 | 815  | 4.9 | 4.7 | 5.1 | ↓ | -0.5 | 5.7E-04 | 8.2E-02 |
| chr3:104349952-104351091 | 1140 | 5.1 | 4.8 | 5.4 | ↓ | -0.6 | 9.9E-08 | 1.0E-04 |
| chr3:104402399-104402671 | 273  | 2.1 | 2.6 | 1.4 | ↑ | 1.2  | 1.8E-04 | 4.1E-02 |
| chr3:10516228-10516676   | 449  | 3.9 | 3.5 | 4.2 | ↓ | -0.7 | 1.6E-04 | 3.8E-02 |
| chr3:105379-105848       | 470  | 3.7 | 3.4 | 4.0 | ↓ | -0.6 | 4.5E-04 | 7.2E-02 |
| chr3:10603881-10604585   | 705  | 4.2 | 4.5 | 3.9 | ↑ | 0.6  | 8.7E-06 | 4.2E-03 |
| chr3:106169799-106170116 | 318  | 2.9 | 2.5 | 3.3 | ↓ | -0.8 | 1.8E-04 | 4.1E-02 |
| chr3:106230218-106230705 | 488  | 4.3 | 4.0 | 4.5 | ↓ | -0.5 | 2.6E-04 | 5.2E-02 |
| chr3:106875768-106876103 | 336  | 4.8 | 4.6 | 5.1 | ↓ | -0.4 | 1.8E-04 | 4.1E-02 |
| chr3:108757602-108758088 | 487  | 3.8 | 3.5 | 4.1 | ↓ | -0.6 | 3.3E-04 | 6.0E-02 |
| chr3:10906022-10906273   | 252  | 2.2 | 1.6 | 2.6 | ↓ | -1.0 | 7.2E-04 | 9.4E-02 |
| chr3:109281449-109281738 | 290  | 3.2 | 2.7 | 3.6 | ↓ | -0.9 | 9.6E-05 | 2.6E-02 |
| chr3:10931100-10931450   | 351  | 2.9 | 2.4 | 3.2 | ↓ | -0.8 | 4.3E-04 | 7.0E-02 |
| chr3:11107270-11108073   | 804  | 5.5 | 5.2 | 5.7 | ↓ | -0.6 | 7.1E-07 | 5.3E-04 |
| chr3:111933175-111933447 | 273  | 2.4 | 1.6 | 2.9 | ↓ | -1.4 | 1.1E-06 | 8.0E-04 |
| chr3:112590006-112590351 | 346  | 2.8 | 2.4 | 3.2 | ↓ | -0.9 | 2.1E-04 | 4.5E-02 |
| chr3:11271103-11271584   | 482  | 3.4 | 2.6 | 3.8 | ↓ | -1.2 | 1.6E-08 | 2.1E-05 |

|                          |      |     |     |     |   |      |         |         |
|--------------------------|------|-----|-----|-----|---|------|---------|---------|
| chr3:113123435-113123863 | 429  | 5.1 | 4.7 | 5.4 | ↓ | -0.7 | 1.3E-09 | 2.3E-06 |
| chr3:113284560-113284836 | 277  | 2.0 | 2.6 | 1.2 | ↑ | 1.4  | 1.4E-05 | 6.2E-03 |
| chr3:113284896-113285295 | 400  | 3.8 | 4.2 | 3.2 | ↑ | 1.0  | 1.8E-09 | 3.0E-06 |
| chr3:11341391-11342520   | 1130 | 6.1 | 6.0 | 6.3 | ↓ | -0.3 | 4.8E-04 | 7.5E-02 |
| chr3:11342676-11343231   | 556  | 4.2 | 3.7 | 4.5 | ↓ | -0.7 | 1.9E-04 | 4.3E-02 |
| chr3:113466260-113466763 | 504  | 3.4 | 2.8 | 3.8 | ↓ | -1.0 | 7.7E-07 | 5.7E-04 |
| chr3:113467086-113467567 | 482  | 3.7 | 3.1 | 4.1 | ↓ | -1.0 | 3.4E-07 | 3.0E-04 |
| chr3:113468556-113469547 | 992  | 4.5 | 4.2 | 4.7 | ↓ | -0.5 | 7.1E-04 | 9.3E-02 |
| chr3:115014071-115014623 | 553  | 4.4 | 4.1 | 4.7 | ↓ | -0.6 | 5.0E-04 | 7.7E-02 |
| chr3:115096931-115097274 | 344  | 2.7 | 2.2 | 3.1 | ↓ | -0.9 | 6.3E-04 | 8.7E-02 |
| chr3:115135644-115135935 | 292  | 2.6 | 3.1 | 1.9 | ↑ | 1.2  | 7.8E-06 | 3.8E-03 |
| chr3:116723657-116724208 | 552  | 4.5 | 4.2 | 4.8 | ↓ | -0.6 | 1.6E-05 | 6.8E-03 |
| chr3:116775345-116775722 | 378  | 2.9 | 2.4 | 3.3 | ↓ | -1.0 | 2.0E-04 | 4.3E-02 |
| chr3:11707314-11707587   | 274  | 1.7 | 2.2 | 0.9 | ↑ | 1.3  | 1.7E-04 | 4.0E-02 |
| chr3:11741020-11741224   | 205  | 1.8 | 2.3 | 1.1 | ↑ | 1.2  | 5.1E-04 | 7.8E-02 |
| chr3:118282925-118283370 | 446  | 3.1 | 3.5 | 2.7 | ↑ | 0.8  | 2.1E-04 | 4.5E-02 |
| chr3:118491974-118492247 | 274  | 2.9 | 3.3 | 2.5 | ↑ | 0.8  | 6.6E-04 | 8.9E-02 |
| chr3:118782268-118783282 | 1015 | 5.3 | 5.4 | 5.0 | ↑ | 0.4  | 2.1E-04 | 4.5E-02 |
| chr3:118956615-118957270 | 656  | 3.0 | 2.4 | 3.3 | ↓ | -0.9 | 1.6E-04 | 3.7E-02 |
| chr3:119220706-119221525 | 820  | 4.1 | 3.7 | 4.4 | ↓ | -0.7 | 3.7E-06 | 2.0E-03 |
| chr3:119312658-119313548 | 891  | 4.5 | 4.0 | 4.8 | ↓ | -0.8 | 5.5E-07 | 4.4E-04 |
| chr3:119314038-119316174 | 2137 | 6.1 | 6.3 | 5.9 | ↑ | 0.3  | 1.6E-06 | 1.1E-03 |
| chr3:119346872-119347121 | 250  | 2.4 | 2.8 | 1.7 | ↑ | 1.1  | 1.3E-04 | 3.2E-02 |
| chr3:12034283-12034682   | 400  | 4.0 | 3.5 | 4.4 | ↓ | -0.9 | 4.1E-07 | 3.5E-04 |
| chr3:120388810-120389460 | 651  | 3.3 | 3.6 | 2.9 | ↑ | 0.7  | 3.9E-04 | 6.7E-02 |
| chr3:120477702-120478227 | 526  | 4.2 | 3.9 | 4.5 | ↓ | -0.5 | 3.2E-04 | 5.9E-02 |
| chr3:120924038-120924475 | 438  | 3.2 | 3.6 | 2.7 | ↑ | 0.8  | 4.1E-04 | 6.8E-02 |
| chr3:121801414-121801919 | 506  | 4.6 | 4.1 | 5.0 | ↓ | -0.8 | 2.1E-09 | 3.4E-06 |
| chr3:121924100-121924399 | 300  | 2.3 | 2.7 | 1.6 | ↑ | 1.2  | 3.0E-05 | 1.1E-02 |
| chr3:122211324-122212217 | 894  | 6.4 | 6.2 | 6.5 | ↓ | -0.3 | 4.1E-04 | 6.8E-02 |
| chr3:122220473-122220769 | 297  | 3.0 | 2.5 | 3.3 | ↓ | -0.8 | 3.8E-04 | 6.6E-02 |
| chr3:122321573-122322793 | 1221 | 5.0 | 5.2 | 4.7 | ↑ | 0.5  | 1.2E-04 | 3.2E-02 |
| chr3:122322794-122323053 | 260  | 2.9 | 3.3 | 2.5 | ↑ | 0.8  | 3.8E-04 | 6.6E-02 |
| chr3:122323812-122325319 | 1508 | 6.0 | 6.1 | 5.8 | ↑ | 0.3  | 6.2E-04 | 8.6E-02 |
| chr3:12246944-12247341   | 398  | 4.3 | 3.6 | 4.8 | ↓ | -1.2 | 1.3E-14 | 7.2E-11 |
| chr3:12257978-12258573   | 596  | 3.1 | 3.6 | 2.4 | ↑ | 1.1  | 1.2E-07 | 1.2E-04 |
| chr3:122636041-122636290 | 250  | 2.8 | 2.2 | 3.2 | ↓ | -0.9 | 2.1E-04 | 4.5E-02 |
| chr3:122669118-122669454 | 337  | 3.9 | 3.6 | 4.2 | ↓ | -0.6 | 6.1E-04 | 8.5E-02 |
| chr3:12270723-12271140   | 418  | 2.5 | 3.0 | 1.8 | ↑ | 1.3  | 5.0E-06 | 2.6E-03 |
| chr3:12274932-12275620   | 689  | 3.9 | 4.2 | 3.4 | ↑ | 0.9  | 5.1E-06 | 2.7E-03 |
| chr3:12275884-12276369   | 486  | 3.3 | 3.8 | 2.7 | ↑ | 1.0  | 2.1E-06 | 1.3E-03 |
| chr3:12328699-12328904   | 206  | 2.3 | 2.8 | 1.8 | ↑ | 1.0  | 4.1E-04 | 6.9E-02 |
| chr3:123761389-123761850 | 462  | 2.9 | 3.3 | 2.5 | ↑ | 0.8  | 3.9E-04 | 6.7E-02 |
| chr3:125307840-125308239 | 400  | 2.4 | 2.8 | 1.7 | ↑ | 1.1  | 3.7E-05 | 1.2E-02 |
| chr3:125308281-125309004 | 724  | 4.0 | 4.4 | 3.5 | ↑ | 0.9  | 1.6E-06 | 1.1E-03 |
| chr3:125337324-125337620 | 297  | 3.0 | 3.4 | 2.5 | ↑ | 0.9  | 1.5E-04 | 3.6E-02 |
| chr3:125774151-125774664 | 514  | 4.0 | 4.2 | 3.7 | ↑ | 0.5  | 5.8E-04 | 8.3E-02 |

|                          |      |     |     |     |   |      |         |         |
|--------------------------|------|-----|-----|-----|---|------|---------|---------|
| chr3:126199780-126200377 | 598  | 3.9 | 3.6 | 4.1 | ↓ | -0.6 | 5.2E-04 | 7.9E-02 |
| chr3:126332547-126334085 | 1539 | 6.5 | 6.6 | 6.3 | ↑ | 0.3  | 3.1E-04 | 5.8E-02 |
| chr3:126363405-126363605 | 201  | 2.4 | 2.9 | 1.8 | ↑ | 1.1  | 3.1E-05 | 1.1E-02 |
| chr3:126396458-126396844 | 387  | 3.7 | 4.1 | 3.2 | ↑ | 0.8  | 6.0E-05 | 1.8E-02 |
| chr3:126421361-126421695 | 335  | 4.0 | 3.7 | 4.3 | ↓ | -0.6 | 6.6E-04 | 8.9E-02 |
| chr3:126421771-126422269 | 499  | 3.5 | 2.9 | 3.9 | ↓ | -1.0 | 9.5E-06 | 4.5E-03 |
| chr3:126564683-126565449 | 767  | 4.4 | 4.1 | 4.6 | ↓ | -0.6 | 9.5E-05 | 2.6E-02 |
| chr3:126581352-126581567 | 216  | 2.0 | 1.4 | 2.4 | ↓ | -1.1 | 5.8E-04 | 8.3E-02 |
| chr3:126582533-126585649 | 3117 | 6.9 | 7.0 | 6.7 | ↑ | 0.2  | 2.6E-04 | 5.2E-02 |
| chr3:126938979-126939328 | 350  | 2.8 | 2.3 | 3.2 | ↓ | -0.9 | 6.6E-04 | 9.0E-02 |
| chr3:127309859-127310712 | 854  | 3.4 | 2.9 | 3.8 | ↓ | -0.9 | 7.7E-06 | 3.8E-03 |
| chr3:128237166-128237438 | 273  | 3.0 | 2.6 | 3.4 | ↓ | -0.8 | 3.1E-04 | 5.7E-02 |
| chr3:128403355-128403848 | 494  | 4.2 | 4.5 | 3.9 | ↑ | 0.7  | 1.8E-04 | 4.1E-02 |
| chr3:129561641-129562772 | 1132 | 4.9 | 4.7 | 5.1 | ↓ | -0.4 | 7.4E-04 | 9.6E-02 |
| chr3:129576838-129577954 | 1117 | 4.9 | 4.7 | 5.1 | ↓ | -0.5 | 4.5E-04 | 7.2E-02 |
| chr3:129688880-129689236 | 357  | 2.5 | 3.0 | 1.9 | ↑ | 1.0  | 4.0E-04 | 6.8E-02 |
| chr3:129771570-129772687 | 1118 | 5.3 | 5.0 | 5.5 | ↓ | -0.4 | 1.8E-05 | 7.1E-03 |
| chr3:129894952-129895334 | 383  | 3.4 | 3.0 | 3.8 | ↓ | -0.8 | 4.0E-05 | 1.3E-02 |
| chr3:129896491-129898354 | 1864 | 5.8 | 6.0 | 5.6 | ↑ | 0.4  | 7.0E-04 | 9.2E-02 |
| chr3:129916271-129916942 | 672  | 3.6 | 3.1 | 4.0 | ↓ | -0.9 | 1.6E-07 | 1.5E-04 |
| chr3:129962606-129963237 | 632  | 7.2 | 7.0 | 7.4 | ↓ | -0.4 | 8.3E-07 | 6.1E-04 |
| chr3:130019919-130020193 | 275  | 1.9 | 1.2 | 2.3 | ↓ | -1.1 | 5.8E-04 | 8.3E-02 |
| chr3:130124214-130124705 | 492  | 3.6 | 3.1 | 4.0 | ↓ | -0.9 | 2.9E-05 | 1.0E-02 |
| chr3:13216776-13217248   | 473  | 4.3 | 3.9 | 4.5 | ↓ | -0.6 | 5.3E-04 | 7.9E-02 |
| chr3:132315118-132315326 | 209  | 2.2 | 1.5 | 2.7 | ↓ | -1.2 | 3.2E-05 | 1.1E-02 |
| chr3:132634647-132634980 | 334  | 2.9 | 3.3 | 2.4 | ↑ | 1.0  | 3.7E-05 | 1.2E-02 |
| chr3:132804918-132805313 | 396  | 3.3 | 2.9 | 3.6 | ↓ | -0.8 | 2.5E-04 | 5.1E-02 |
| chr3:133509158-133509749 | 592  | 3.2 | 3.6 | 2.8 | ↑ | 0.8  | 2.6E-04 | 5.1E-02 |
| chr3:133523491-133523912 | 422  | 4.0 | 4.2 | 3.6 | ↑ | 0.6  | 2.7E-04 | 5.4E-02 |
| chr3:13382788-13384289   | 1502 | 5.7 | 5.1 | 6.1 | ↓ | -0.9 | 7.8E-23 | 2.1E-18 |
| chr3:133883767-133884071 | 305  | 3.1 | 3.5 | 2.7 | ↑ | 0.8  | 2.9E-04 | 5.6E-02 |
| chr3:133926300-133926697 | 398  | 3.7 | 3.4 | 4.0 | ↓ | -0.6 | 7.2E-04 | 9.4E-02 |
| chr3:134014083-134019326 | 5244 | 8.1 | 8.0 | 8.2 | ↓ | -0.2 | 2.3E-04 | 4.9E-02 |
| chr3:134410586-134411050 | 465  | 4.7 | 4.5 | 4.9 | ↓ | -0.4 | 2.6E-04 | 5.1E-02 |
| chr3:134731820-134733776 | 1957 | 5.8 | 6.0 | 5.6 | ↑ | 0.4  | 6.2E-05 | 1.9E-02 |
| chr3:134947589-134948404 | 816  | 4.4 | 4.1 | 4.6 | ↓ | -0.5 | 4.3E-04 | 7.1E-02 |
| chr3:135027566-135029412 | 1847 | 7.6 | 7.5 | 7.8 | ↓ | -0.2 | 4.4E-04 | 7.2E-02 |
| chr3:135052705-135056591 | 3887 | 7.2 | 7.1 | 7.3 | ↓ | -0.2 | 1.6E-04 | 3.8E-02 |
| chr3:135391083-135392137 | 1055 | 5.5 | 5.3 | 5.6 | ↓ | -0.3 | 6.7E-04 | 9.0E-02 |
| chr3:135490414-135490947 | 534  | 4.0 | 3.6 | 4.2 | ↓ | -0.7 | 2.4E-05 | 9.0E-03 |
| chr3:13623591-13623954   | 364  | 2.8 | 3.2 | 2.3 | ↑ | 0.9  | 1.6E-04 | 3.7E-02 |
| chr3:136304860-136305117 | 258  | 3.3 | 2.8 | 3.6 | ↓ | -0.8 | 1.8E-04 | 4.1E-02 |
| chr3:136371917-136372396 | 480  | 4.1 | 3.7 | 4.5 | ↓ | -0.8 | 5.9E-07 | 4.6E-04 |
| chr3:136733473-136733705 | 233  | 2.2 | 1.7 | 2.6 | ↓ | -1.0 | 6.1E-04 | 8.5E-02 |
| chr3:136738547-136738769 | 223  | 2.4 | 2.8 | 1.9 | ↑ | 1.0  | 2.8E-04 | 5.5E-02 |
| chr3:136756427-136756805 | 379  | 3.7 | 3.3 | 4.0 | ↓ | -0.7 | 4.5E-04 | 7.3E-02 |
| chr3:137630539-137630868 | 330  | 2.8 | 3.2 | 2.3 | ↑ | 0.8  | 6.0E-04 | 8.5E-02 |

|                          |      |     |     |     |   |      |         |         |
|--------------------------|------|-----|-----|-----|---|------|---------|---------|
| chr3:137650811-137651506 | 696  | 3.8 | 4.1 | 3.5 | ↑ | 0.6  | 2.9E-04 | 5.5E-02 |
| chr3:137715822-137716370 | 549  | 4.4 | 4.0 | 4.6 | ↓ | -0.6 | 8.2E-06 | 4.0E-03 |
| chr3:137779356-137779704 | 349  | 3.3 | 3.7 | 2.8 | ↑ | 0.8  | 6.5E-05 | 1.9E-02 |
| chr3:138066309-138066708 | 400  | 3.3 | 2.7 | 3.6 | ↓ | -0.9 | 1.3E-05 | 5.6E-03 |
| chr3:138085442-138085845 | 404  | 3.3 | 2.7 | 3.8 | ↓ | -1.1 | 4.0E-08 | 4.7E-05 |
| chr3:138189247-138189587 | 341  | 2.7 | 2.1 | 3.2 | ↓ | -1.1 | 2.1E-05 | 7.9E-03 |
| chr3:138352538-138353125 | 588  | 4.6 | 4.0 | 5.0 | ↓ | -1.0 | 4.0E-09 | 5.8E-06 |
| chr3:138686027-138686966 | 940  | 5.5 | 5.2 | 5.7 | ↓ | -0.4 | 1.8E-04 | 4.1E-02 |
| chr3:1390419-1392204     | 1786 | 7.3 | 7.1 | 7.5 | ↓ | -0.3 | 4.6E-07 | 3.8E-04 |
| chr3:139066866-139067422 | 557  | 4.4 | 3.7 | 4.8 | ↓ | -1.1 | 5.8E-13 | 2.1E-09 |
| chr3:139113008-139113363 | 356  | 3.2 | 2.8 | 3.5 | ↓ | -0.7 | 5.4E-04 | 8.0E-02 |
| chr3:139131824-139132101 | 278  | 3.1 | 2.7 | 3.4 | ↓ | -0.7 | 6.6E-04 | 8.9E-02 |
| chr3:139316860-139317363 | 504  | 3.7 | 4.0 | 3.3 | ↑ | 0.7  | 6.3E-04 | 8.7E-02 |
| chr3:139460881-139461078 | 198  | 1.7 | 2.2 | 1.0 | ↑ | 1.3  | 4.1E-04 | 6.9E-02 |
| chr3:139501597-139502053 | 457  | 4.9 | 4.2 | 5.3 | ↓ | -1.1 | 3.1E-13 | 1.4E-09 |
| chr3:139591569-139591863 | 295  | 1.9 | 1.1 | 2.4 | ↓ | -1.3 | 1.1E-04 | 3.0E-02 |
| chr3:140183109-140184169 | 1061 | 4.6 | 4.4 | 4.9 | ↓ | -0.5 | 1.9E-04 | 4.2E-02 |
| chr3:14024348-14024880   | 533  | 3.7 | 4.0 | 3.2 | ↑ | 0.9  | 1.5E-05 | 6.2E-03 |
| chr3:140294655-140295783 | 1129 | 6.3 | 6.0 | 6.6 | ↓ | -0.6 | 1.1E-10 | 2.7E-07 |
| chr3:140310416-140311508 | 1093 | 6.2 | 5.6 | 6.6 | ↓ | -1.0 | 4.0E-13 | 1.6E-09 |
| chr3:140362049-140365097 | 3049 | 7.3 | 7.2 | 7.4 | ↓ | -0.2 | 3.8E-05 | 1.3E-02 |
| chr3:140690691-140691752 | 1062 | 6.1 | 5.8 | 6.3 | ↓ | -0.5 | 1.4E-04 | 3.6E-02 |
| chr3:140707259-140709583 | 2325 | 6.9 | 6.7 | 7.0 | ↓ | -0.3 | 7.2E-05 | 2.1E-02 |
| chr3:140787387-140787670 | 284  | 2.0 | 1.0 | 2.6 | ↓ | -1.5 | 2.6E-06 | 1.6E-03 |
| chr3:140814626-140818587 | 3962 | 7.7 | 7.6 | 7.8 | ↓ | -0.2 | 1.1E-04 | 3.0E-02 |
| chr3:140823682-140824841 | 1160 | 4.9 | 4.4 | 5.3 | ↓ | -0.9 | 2.2E-09 | 3.4E-06 |
| chr3:140860051-140862229 | 2179 | 7.2 | 7.0 | 7.4 | ↓ | -0.3 | 8.0E-10 | 1.5E-06 |
| chr3:140875953-140877198 | 1246 | 5.7 | 5.6 | 5.9 | ↓ | -0.3 | 6.8E-04 | 9.0E-02 |
| chr3:14095966-14096156   | 191  | 2.3 | 2.7 | 1.7 | ↑ | 1.1  | 1.2E-04 | 3.1E-02 |
| chr3:141030723-141033143 | 2421 | 7.3 | 7.2 | 7.4 | ↓ | -0.2 | 3.0E-04 | 5.6E-02 |
| chr3:141194503-141194849 | 347  | 3.5 | 2.9 | 3.9 | ↓ | -1.0 | 6.2E-06 | 3.2E-03 |
| chr3:141245595-141247237 | 1643 | 6.6 | 6.5 | 6.8 | ↓ | -0.3 | 9.5E-05 | 2.6E-02 |
| chr3:141267770-141269122 | 1353 | 6.9 | 6.8 | 7.0 | ↓ | -0.2 | 3.7E-04 | 6.5E-02 |
| chr3:141410111-141412596 | 2486 | 6.9 | 6.8 | 7.1 | ↓ | -0.2 | 2.8E-05 | 1.0E-02 |
| chr3:141427389-141430490 | 3102 | 8.7 | 8.6 | 8.7 | ↓ | -0.1 | 6.4E-05 | 1.9E-02 |
| chr3:14161394-14161834   | 441  | 3.1 | 3.5 | 2.5 | ↑ | 0.9  | 1.5E-05 | 6.2E-03 |
| chr3:141661604-141662769 | 1166 | 5.8 | 5.6 | 6.1 | ↓ | -0.5 | 5.9E-09 | 8.1E-06 |
| chr3:141672598-141673424 | 827  | 5.4 | 5.1 | 5.6 | ↓ | -0.5 | 1.6E-06 | 1.1E-03 |
| chr3:141968739-141969544 | 806  | 6.0 | 5.3 | 6.4 | ↓ | -1.1 | 1.4E-17 | 1.3E-13 |
| chr3:142325161-142328950 | 3790 | 7.8 | 7.7 | 7.9 | ↓ | -0.2 | 5.3E-04 | 7.9E-02 |
| chr3:14425764-14425992   | 229  | 2.3 | 1.7 | 2.7 | ↓ | -1.0 | 3.9E-04 | 6.7E-02 |
| chr3:14466434-14466954   | 521  | 3.6 | 3.2 | 4.0 | ↓ | -0.8 | 1.0E-05 | 4.7E-03 |
| chr3:1447669-1448334     | 666  | 4.8 | 4.1 | 5.2 | ↓ | -1.1 | 2.5E-13 | 1.2E-09 |
| chr3:14537302-14537913   | 612  | 4.7 | 4.9 | 4.5 | ↑ | 0.5  | 7.8E-04 | 9.9E-02 |
| chr3:14561609-14561996   | 388  | 3.0 | 3.4 | 2.5 | ↑ | 0.9  | 4.5E-05 | 1.4E-02 |
| chr3:14568430-14569341   | 912  | 5.4 | 5.5 | 5.2 | ↑ | 0.4  | 2.9E-04 | 5.6E-02 |
| chr3:14740365-14741555   | 1191 | 5.4 | 5.5 | 5.2 | ↑ | 0.3  | 3.0E-04 | 5.7E-02 |

|                        |       |     |     |     |   |      |         |         |
|------------------------|-------|-----|-----|-----|---|------|---------|---------|
| chr3:14745898-14746496 | 599   | 3.8 | 4.1 | 3.5 | ↑ | 0.6  | 6.5E-04 | 8.9E-02 |
| chr3:14852692-14853148 | 457   | 4.0 | 4.4 | 3.5 | ↑ | 0.8  | 6.7E-07 | 5.1E-04 |
| chr3:14853380-14854254 | 875   | 4.6 | 5.2 | 3.6 | ↑ | 1.6  | 5.2E-23 | 2.1E-18 |
| chr3:14856004-14857411 | 1408  | 5.4 | 5.7 | 4.9 | ↑ | 0.9  | 3.4E-19 | 3.7E-15 |
| chr3:14857459-14861373 | 3915  | 6.6 | 6.9 | 6.2 | ↑ | 0.7  | 4.1E-07 | 3.5E-04 |
| chr3:14870414-14870937 | 524   | 3.3 | 3.6 | 2.9 | ↑ | 0.7  | 2.8E-04 | 5.5E-02 |
| chr3:15522486-15522933 | 448   | 4.0 | 4.3 | 3.6 | ↑ | 0.7  | 1.7E-05 | 6.9E-03 |
| chr3:15794166-15795801 | 1636  | 5.5 | 5.2 | 5.8 | ↓ | -0.5 | 1.2E-05 | 5.3E-03 |
| chr3:16193148-16194172 | 1025  | 5.9 | 5.6 | 6.0 | ↓ | -0.4 | 1.3E-04 | 3.2E-02 |
| chr3:16500150-16500353 | 204   | 1.9 | 2.4 | 1.3 | ↑ | 1.1  | 5.4E-04 | 8.0E-02 |
| chr3:16587596-16587856 | 261   | 2.7 | 3.1 | 2.1 | ↑ | 1.0  | 1.5E-04 | 3.6E-02 |
| chr3:16913580-16914303 | 724   | 4.9 | 4.7 | 5.1 | ↓ | -0.4 | 5.0E-04 | 7.8E-02 |
| chr3:17207667-17208726 | 1060  | 5.2 | 5.0 | 5.4 | ↓ | -0.4 | 1.2E-04 | 3.1E-02 |
| chr3:17513864-17514794 | 931   | 5.2 | 4.9 | 5.4 | ↓ | -0.5 | 9.5E-06 | 4.5E-03 |
| chr3:17582657-17583824 | 1168  | 7.8 | 7.6 | 7.9 | ↓ | -0.2 | 2.3E-04 | 4.7E-02 |
| chr3:1765785-1776535   | 10751 | 9.8 | 9.7 | 9.8 | ↓ | -0.1 | 7.2E-05 | 2.1E-02 |
| chr3:17792031-17792739 | 709   | 4.2 | 3.7 | 4.6 | ↓ | -0.9 | 3.7E-07 | 3.2E-04 |
| chr3:18037483-18037976 | 494   | 4.0 | 3.6 | 4.4 | ↓ | -0.8 | 1.8E-07 | 1.6E-04 |
| chr3:18350754-18351377 | 624   | 4.0 | 3.6 | 4.3 | ↓ | -0.7 | 3.8E-05 | 1.3E-02 |
| chr3:18539621-18540591 | 971   | 5.6 | 5.4 | 5.8 | ↓ | -0.4 | 1.1E-05 | 4.9E-03 |
| chr3:18563706-18564073 | 368   | 2.1 | 2.7 | 1.2 | ↑ | 1.5  | 1.9E-06 | 1.2E-03 |
| chr3:18738615-18740636 | 2022  | 6.6 | 6.4 | 6.7 | ↓ | -0.4 | 1.3E-04 | 3.3E-02 |
| chr3:18869262-18869903 | 642   | 4.2 | 4.6 | 3.7 | ↑ | 0.9  | 3.9E-08 | 4.7E-05 |
| chr3:18965613-18966108 | 496   | 4.4 | 4.0 | 4.6 | ↓ | -0.6 | 2.3E-04 | 4.7E-02 |
| chr3:18973678-18974152 | 475   | 3.9 | 3.6 | 4.2 | ↓ | -0.6 | 3.5E-04 | 6.2E-02 |
| chr3:19101540-19103320 | 1781  | 6.9 | 6.7 | 7.0 | ↓ | -0.3 | 1.6E-06 | 1.1E-03 |
| chr3:19146999-19147931 | 933   | 5.3 | 5.0 | 5.5 | ↓ | -0.4 | 2.8E-04 | 5.4E-02 |
| chr3:19187965-19188813 | 849   | 5.1 | 4.9 | 5.3 | ↓ | -0.4 | 5.4E-04 | 8.0E-02 |
| chr3:19635990-19636672 | 683   | 4.4 | 4.0 | 4.7 | ↓ | -0.7 | 3.9E-06 | 2.1E-03 |
| chr3:19636773-19637887 | 1115  | 5.7 | 5.5 | 5.9 | ↓ | -0.4 | 2.2E-04 | 4.6E-02 |
| chr3:19651852-19653527 | 1676  | 6.1 | 5.8 | 6.3 | ↓ | -0.5 | 4.1E-13 | 1.6E-09 |
| chr3:19798219-19798931 | 713   | 3.8 | 4.1 | 3.4 | ↑ | 0.7  | 4.4E-04 | 7.2E-02 |
| chr3:2007113-2008436   | 1324  | 5.6 | 5.4 | 5.8 | ↓ | -0.4 | 3.1E-05 | 1.1E-02 |
| chr3:20542953-20544013 | 1061  | 4.8 | 4.5 | 5.1 | ↓ | -0.6 | 3.1E-04 | 5.8E-02 |
| chr3:20988006-20988540 | 535   | 5.0 | 4.7 | 5.2 | ↓ | -0.5 | 3.9E-04 | 6.7E-02 |
| chr3:21684547-21684793 | 247   | 2.7 | 3.2 | 2.2 | ↑ | 1.0  | 1.8E-04 | 4.1E-02 |
| chr3:2175566-2176548   | 983   | 4.6 | 4.2 | 5.0 | ↓ | -0.8 | 1.6E-05 | 6.5E-03 |
| chr3:2272131-2272552   | 422   | 3.3 | 2.7 | 3.7 | ↓ | -1.0 | 3.5E-06 | 2.0E-03 |
| chr3:22960465-22960935 | 471   | 3.9 | 3.4 | 4.3 | ↓ | -1.0 | 1.8E-08 | 2.3E-05 |
| chr3:22982628-22983101 | 474   | 3.4 | 2.9 | 3.8 | ↓ | -0.9 | 2.6E-05 | 9.7E-03 |
| chr3:23029575-23030062 | 488   | 4.3 | 4.0 | 4.5 | ↓ | -0.5 | 1.5E-04 | 3.6E-02 |
| chr3:23058133-23058985 | 853   | 4.9 | 4.6 | 5.1 | ↓ | -0.5 | 2.1E-05 | 7.9E-03 |
| chr3:23548811-23549575 | 765   | 5.1 | 4.9 | 5.3 | ↓ | -0.4 | 4.7E-04 | 7.4E-02 |
| chr3:23714000-23714714 | 715   | 4.8 | 4.5 | 5.0 | ↓ | -0.5 | 2.8E-05 | 1.0E-02 |
| chr3:25810146-25810402 | 257   | 1.9 | 2.4 | 1.1 | ↑ | 1.3  | 2.1E-04 | 4.5E-02 |
| chr3:26638901-26639260 | 360   | 3.7 | 3.4 | 4.0 | ↓ | -0.6 | 7.0E-04 | 9.2E-02 |
| chr3:27466093-27466428 | 336   | 2.9 | 3.2 | 2.4 | ↑ | 0.8  | 4.3E-04 | 7.1E-02 |



|                        |      |     |     |     |   |      |         |         |
|------------------------|------|-----|-----|-----|---|------|---------|---------|
| chr3:27770292-27771557 | 1266 | 5.7 | 5.5 | 5.8 | ↓ | -0.3 | 3.1E-04 | 5.8E-02 |
| chr3:28068790-28069109 | 320  | 2.9 | 2.4 | 3.3 | ↓ | -0.9 | 4.3E-04 | 7.0E-02 |
| chr3:28532572-28532787 | 216  | 2.2 | 1.6 | 2.7 | ↓ | -1.0 | 7.2E-04 | 9.4E-02 |
| chr3:2932703-2933142   | 440  | 4.5 | 4.1 | 4.7 | ↓ | -0.6 | 4.1E-05 | 1.3E-02 |
| chr3:2960064-2960281   | 218  | 2.3 | 2.7 | 1.7 | ↑ | 1.0  | 4.0E-04 | 6.8E-02 |
| chr3:29620404-29621644 | 1241 | 5.1 | 4.8 | 5.3 | ↓ | -0.4 | 8.4E-05 | 2.4E-02 |
| chr3:29904160-29904685 | 526  | 4.1 | 3.7 | 4.5 | ↓ | -0.8 | 6.3E-06 | 3.2E-03 |
| chr3:31220705-31221516 | 812  | 4.8 | 4.3 | 5.1 | ↓ | -0.8 | 7.2E-08 | 7.9E-05 |
| chr3:32341881-32342624 | 744  | 4.0 | 3.7 | 4.2 | ↓ | -0.5 | 5.2E-04 | 7.9E-02 |
| chr3:32640630-32640855 | 226  | 2.0 | 1.4 | 2.4 | ↓ | -1.1 | 7.0E-04 | 9.2E-02 |
| chr3:3278422-3278641   | 220  | 2.3 | 1.7 | 2.8 | ↓ | -1.1 | 7.4E-05 | 2.1E-02 |
| chr3:33193028-33194175 | 1148 | 4.9 | 5.1 | 4.6 | ↑ | 0.5  | 6.4E-05 | 1.9E-02 |
| chr3:33932298-33932741 | 444  | 3.2 | 2.8 | 3.5 | ↓ | -0.7 | 7.7E-04 | 9.8E-02 |
| chr3:34667918-34670476 | 2559 | 6.9 | 6.7 | 7.1 | ↓ | -0.3 | 2.1E-06 | 1.3E-03 |
| chr3:3467383-3468046   | 664  | 4.1 | 3.7 | 4.3 | ↓ | -0.7 | 1.3E-04 | 3.3E-02 |
| chr3:35491238-35491664 | 427  | 3.0 | 2.5 | 3.4 | ↓ | -0.9 | 3.9E-05 | 1.3E-02 |
| chr3:35621924-35622171 | 248  | 2.1 | 1.4 | 2.5 | ↓ | -1.1 | 4.8E-04 | 7.5E-02 |
| chr3:35643154-35643679 | 526  | 2.9 | 3.3 | 2.5 | ↑ | 0.8  | 6.6E-04 | 8.9E-02 |
| chr3:36165799-36166144 | 346  | 4.3 | 3.4 | 4.9 | ↓ | -1.6 | 1.7E-22 | 3.0E-18 |
| chr3:3623316-3624923   | 1608 | 7.2 | 7.3 | 7.0 | ↑ | 0.2  | 1.6E-06 | 1.1E-03 |
| chr3:3684885-3687963   | 3079 | 7.2 | 7.2 | 7.1 | ↑ | 0.2  | 5.3E-04 | 7.9E-02 |
| chr3:37103875-37104075 | 201  | 2.2 | 2.6 | 1.6 | ↑ | 1.0  | 6.0E-04 | 8.5E-02 |
| chr3:37105175-37105833 | 659  | 3.3 | 2.8 | 3.7 | ↓ | -0.9 | 9.2E-05 | 2.6E-02 |
| chr3:37182934-37183353 | 420  | 4.7 | 4.3 | 4.9 | ↓ | -0.6 | 3.7E-06 | 2.0E-03 |
| chr3:37187747-37188175 | 429  | 3.6 | 3.1 | 4.0 | ↓ | -0.9 | 3.2E-05 | 1.1E-02 |
| chr3:37376372-37377237 | 866  | 3.9 | 3.6 | 4.2 | ↓ | -0.6 | 2.0E-04 | 4.4E-02 |
| chr3:37587243-37587922 | 680  | 5.5 | 5.2 | 5.8 | ↓ | -0.5 | 2.7E-05 | 1.0E-02 |
| chr3:38357258-38357618 | 361  | 3.5 | 3.1 | 3.8 | ↓ | -0.7 | 7.7E-04 | 9.8E-02 |
| chr3:38478439-38479008 | 570  | 5.6 | 5.4 | 5.7 | ↓ | -0.3 | 7.4E-04 | 9.5E-02 |
| chr3:39007012-39008472 | 1461 | 5.4 | 5.1 | 5.6 | ↓ | -0.4 | 6.5E-04 | 8.9E-02 |
| chr3:39014556-39016120 | 1565 | 6.1 | 5.9 | 6.3 | ↓ | -0.3 | 2.3E-04 | 4.8E-02 |
| chr3:39561227-39562766 | 1540 | 6.6 | 6.4 | 6.8 | ↓ | -0.3 | 3.7E-05 | 1.2E-02 |
| chr3:4048659-4049350   | 692  | 4.1 | 3.7 | 4.3 | ↓ | -0.6 | 4.1E-04 | 6.8E-02 |
| chr3:40591893-40592320 | 428  | 3.0 | 2.4 | 3.5 | ↓ | -1.0 | 7.6E-05 | 2.2E-02 |
| chr3:40774884-40775170 | 287  | 4.8 | 4.5 | 5.0 | ↓ | -0.4 | 4.9E-04 | 7.6E-02 |
| chr3:4080691-4083445   | 2755 | 7.1 | 6.9 | 7.2 | ↓ | -0.3 | 3.0E-06 | 1.8E-03 |
| chr3:40859996-40860645 | 650  | 5.0 | 5.2 | 4.8 | ↑ | 0.4  | 6.0E-04 | 8.5E-02 |
| chr3:40883750-40885242 | 1493 | 7.0 | 6.8 | 7.1 | ↓ | -0.2 | 2.1E-04 | 4.5E-02 |
| chr3:4103258-4105708   | 2451 | 6.5 | 6.3 | 6.7 | ↓ | -0.4 | 1.3E-08 | 1.7E-05 |
| chr3:41144227-41144571 | 345  | 3.1 | 2.6 | 3.5 | ↓ | -0.9 | 3.2E-05 | 1.1E-02 |
| chr3:41636909-41640248 | 3340 | 7.9 | 7.9 | 8.0 | ↓ | -0.2 | 5.2E-04 | 7.9E-02 |
| chr3:41701121-41703436 | 2316 | 6.5 | 6.3 | 6.7 | ↓ | -0.4 | 8.7E-08 | 9.3E-05 |
| chr3:41811095-41811375 | 281  | 2.8 | 2.3 | 3.2 | ↓ | -0.9 | 2.4E-04 | 4.9E-02 |
| chr3:41812496-41815458 | 2963 | 7.3 | 7.2 | 7.4 | ↓ | -0.3 | 1.5E-07 | 1.4E-04 |
| chr3:41933735-41934167 | 433  | 3.9 | 3.4 | 4.3 | ↓ | -0.8 | 1.0E-06 | 7.2E-04 |
| chr3:42311583-42313675 | 2093 | 6.5 | 6.4 | 6.6 | ↓ | -0.2 | 6.1E-04 | 8.5E-02 |
| chr3:42320335-42321074 | 740  | 4.5 | 4.1 | 4.8 | ↓ | -0.6 | 1.9E-06 | 1.2E-03 |

|                        |      |     |     |     |   |      |         |         |
|------------------------|------|-----|-----|-----|---|------|---------|---------|
| chr3:42321906-42322339 | 434  | 2.7 | 2.1 | 3.1 | ↓ | -1.0 | 4.6E-04 | 7.3E-02 |
| chr3:42323380-42324606 | 1227 | 5.0 | 4.7 | 5.3 | ↓ | -0.6 | 3.0E-05 | 1.1E-02 |
| chr3:42324630-42326604 | 1975 | 7.0 | 6.9 | 7.2 | ↓ | -0.4 | 4.7E-07 | 3.8E-04 |
| chr3:4322215-4323231   | 1017 | 5.4 | 5.2 | 5.6 | ↓ | -0.4 | 1.4E-04 | 3.4E-02 |
| chr3:4357200-4358121   | 922  | 4.4 | 3.9 | 4.7 | ↓ | -0.8 | 3.3E-06 | 1.9E-03 |
| chr3:43815879-43816184 | 306  | 3.4 | 3.0 | 3.7 | ↓ | -0.7 | 7.0E-04 | 9.3E-02 |
| chr3:44085053-44085932 | 880  | 4.5 | 3.9 | 4.8 | ↓ | -0.9 | 1.3E-11 | 3.9E-08 |
| chr3:44557169-44557935 | 767  | 5.0 | 4.8 | 5.2 | ↓ | -0.4 | 1.3E-04 | 3.3E-02 |
| chr3:46209327-46209723 | 397  | 3.5 | 3.0 | 3.8 | ↓ | -0.8 | 1.0E-04 | 2.7E-02 |
| chr3:46681387-46681834 | 448  | 3.3 | 3.6 | 2.8 | ↑ | 0.8  | 9.4E-05 | 2.6E-02 |
| chr3:46720041-46720615 | 575  | 3.9 | 3.6 | 4.2 | ↓ | -0.6 | 7.8E-04 | 9.9E-02 |
| chr3:4717433-4718242   | 810  | 4.2 | 3.6 | 4.6 | ↓ | -0.9 | 2.5E-10 | 5.8E-07 |
| chr3:47186475-47187023 | 549  | 3.7 | 3.4 | 4.0 | ↓ | -0.6 | 5.3E-04 | 7.9E-02 |
| chr3:47333438-47334461 | 1024 | 4.8 | 5.1 | 4.3 | ↑ | 0.8  | 2.4E-04 | 4.9E-02 |
| chr3:47336930-47337189 | 260  | 1.8 | 2.3 | 1.0 | ↑ | 1.3  | 7.0E-04 | 9.2E-02 |
| chr3:47513284-47513920 | 637  | 2.8 | 3.2 | 2.3 | ↑ | 0.9  | 5.5E-04 | 8.1E-02 |
| chr3:48859209-48860074 | 866  | 4.6 | 4.3 | 4.8 | ↓ | -0.5 | 3.3E-04 | 6.0E-02 |
| chr3:48881871-48882032 | 162  | 1.4 | 1.9 | 0.5 | ↑ | 1.4  | 3.4E-04 | 6.1E-02 |
| chr3:4930034-4930808   | 775  | 5.2 | 4.9 | 5.4 | ↓ | -0.5 | 8.5E-05 | 2.4E-02 |
| chr3:49786356-49787826 | 1471 | 5.7 | 5.4 | 5.8 | ↓ | -0.4 | 1.0E-04 | 2.8E-02 |
| chr3:4993791-4994123   | 333  | 4.0 | 3.6 | 4.4 | ↓ | -0.7 | 2.0E-05 | 7.9E-03 |
| chr3:50370005-50370326 | 322  | 3.3 | 3.6 | 2.9 | ↑ | 0.7  | 5.1E-04 | 7.9E-02 |
| chr3:50539927-50540469 | 543  | 3.0 | 2.4 | 3.4 | ↓ | -1.0 | 2.0E-05 | 7.9E-03 |
| chr3:50810995-50811586 | 592  | 3.9 | 3.6 | 4.1 | ↓ | -0.6 | 5.3E-04 | 7.9E-02 |
| chr3:51136119-51136965 | 847  | 4.5 | 4.8 | 4.2 | ↑ | 0.5  | 2.1E-04 | 4.5E-02 |
| chr3:51228077-51228294 | 218  | 1.6 | 0.8 | 2.1 | ↓ | -1.3 | 3.5E-04 | 6.3E-02 |
| chr3:51604514-51605190 | 677  | 4.0 | 3.5 | 4.3 | ↓ | -0.8 | 5.4E-05 | 1.7E-02 |
| chr3:51708155-51708470 | 316  | 2.9 | 2.4 | 3.3 | ↓ | -0.9 | 2.4E-04 | 4.9E-02 |
| chr3:51749461-51749711 | 251  | 2.3 | 1.7 | 2.8 | ↓ | -1.1 | 1.5E-04 | 3.6E-02 |
| chr3:51778158-51778990 | 833  | 5.3 | 5.1 | 5.4 | ↓ | -0.4 | 4.7E-04 | 7.4E-02 |
| chr3:52016012-52016414 | 403  | 3.0 | 2.1 | 3.5 | ↓ | -1.5 | 4.4E-10 | 9.4E-07 |
| chr3:52245516-52245776 | 261  | 2.7 | 2.3 | 3.1 | ↓ | -0.8 | 5.7E-04 | 8.3E-02 |
| chr3:52420624-52421206 | 583  | 4.8 | 4.5 | 5.0 | ↓ | -0.4 | 6.7E-04 | 9.0E-02 |
| chr3:5379027-5379720   | 694  | 4.6 | 4.3 | 4.8 | ↓ | -0.5 | 3.8E-04 | 6.7E-02 |
| chr3:5398773-5399057   | 285  | 3.2 | 2.8 | 3.6 | ↓ | -0.9 | 2.7E-04 | 5.4E-02 |
| chr3:55113740-55114474 | 735  | 4.9 | 4.6 | 5.1 | ↓ | -0.5 | 4.6E-04 | 7.3E-02 |
| chr3:55260747-55261033 | 287  | 2.3 | 1.7 | 2.7 | ↓ | -1.0 | 3.5E-04 | 6.2E-02 |
| chr3:55728989-55729422 | 434  | 3.7 | 3.2 | 4.0 | ↓ | -0.8 | 5.8E-05 | 1.8E-02 |
| chr3:55983254-55983478 | 225  | 2.3 | 1.8 | 2.7 | ↓ | -0.9 | 7.2E-04 | 9.4E-02 |
| chr3:55995875-55996165 | 291  | 2.2 | 1.5 | 2.7 | ↓ | -1.1 | 1.9E-04 | 4.3E-02 |
| chr3:56278390-56278754 | 365  | 2.0 | 2.4 | 1.3 | ↑ | 1.1  | 3.8E-04 | 6.6E-02 |
| chr3:56725036-56725306 | 271  | 3.0 | 2.2 | 3.4 | ↓ | -1.2 | 1.0E-07 | 1.0E-04 |
| chr3:5715583-5715989   | 407  | 3.2 | 2.7 | 3.6 | ↓ | -1.0 | 2.3E-06 | 1.4E-03 |
| chr3:57207462-57207960 | 499  | 4.7 | 4.5 | 4.9 | ↓ | -0.4 | 4.6E-04 | 7.4E-02 |
| chr3:57231843-57232297 | 455  | 3.7 | 3.2 | 4.0 | ↓ | -0.8 | 7.3E-06 | 3.7E-03 |
| chr3:58022141-58022686 | 546  | 4.0 | 3.6 | 4.3 | ↓ | -0.8 | 2.7E-05 | 1.0E-02 |
| chr3:58445861-58446041 | 181  | 1.8 | 2.4 | 1.0 | ↑ | 1.4  | 5.6E-05 | 1.7E-02 |

|                        |      |     |     |     |   |      |         |         |
|------------------------|------|-----|-----|-----|---|------|---------|---------|
| chr3:58472906-58473977 | 1072 | 5.9 | 5.7 | 6.0 | ↓ | -0.3 | 2.4E-04 | 4.9E-02 |
| chr3:58672874-58673156 | 283  | 2.1 | 1.4 | 2.6 | ↓ | -1.2 | 1.5E-04 | 3.6E-02 |
| chr3:59518474-59518701 | 228  | 2.1 | 2.5 | 1.4 | ↑ | 1.2  | 2.5E-04 | 5.1E-02 |
| chr3:60149240-60149581 | 342  | 2.8 | 2.3 | 3.1 | ↓ | -0.9 | 3.1E-04 | 5.8E-02 |
| chr3:61294886-61295274 | 389  | 2.5 | 1.9 | 2.9 | ↓ | -1.0 | 1.1E-04 | 3.0E-02 |
| chr3:61665191-61665638 | 448  | 3.9 | 3.6 | 4.2 | ↓ | -0.6 | 5.7E-04 | 8.3E-02 |
| chr3:61779478-61779783 | 306  | 3.7 | 4.1 | 3.2 | ↑ | 0.9  | 4.3E-07 | 3.6E-04 |
| chr3:62345732-62346263 | 532  | 4.3 | 4.1 | 4.6 | ↓ | -0.5 | 5.8E-04 | 8.3E-02 |
| chr3:62540797-62541724 | 928  | 4.8 | 4.5 | 5.1 | ↓ | -0.7 | 1.0E-07 | 1.0E-04 |
| chr3:62721403-62721818 | 416  | 2.3 | 1.7 | 2.7 | ↓ | -1.0 | 6.8E-04 | 9.1E-02 |
| chr3:64101897-64102131 | 235  | 2.0 | 1.3 | 2.4 | ↓ | -1.1 | 6.5E-04 | 8.9E-02 |
| chr3:66670558-66670757 | 200  | 2.7 | 2.2 | 3.1 | ↓ | -0.9 | 4.6E-04 | 7.4E-02 |
| chr3:67016072-67016315 | 244  | 3.3 | 2.8 | 3.6 | ↓ | -0.8 | 3.4E-04 | 6.1E-02 |
| chr3:68228716-68229213 | 498  | 4.0 | 3.5 | 4.4 | ↓ | -0.9 | 2.6E-05 | 9.8E-03 |
| chr3:693545-699614     | 6070 | 8.8 | 8.7 | 8.9 | ↓ | -0.1 | 3.2E-04 | 5.9E-02 |
| chr3:69447011-69447235 | 225  | 2.5 | 1.6 | 3.1 | ↓ | -1.5 | 1.4E-07 | 1.3E-04 |
| chr3:70022-73125       | 3104 | 7.3 | 7.4 | 7.1 | ↑ | 0.3  | 2.8E-06 | 1.7E-03 |
| chr3:7108235-7108440   | 206  | 2.4 | 1.9 | 2.8 | ↓ | -1.0 | 5.1E-04 | 7.8E-02 |
| chr3:71526169-71526704 | 536  | 4.1 | 3.8 | 4.4 | ↓ | -0.6 | 2.0E-05 | 7.9E-03 |
| chr3:7176789-7177113   | 325  | 3.9 | 3.5 | 4.2 | ↓ | -0.6 | 3.9E-04 | 6.7E-02 |
| chr3:71782747-71782930 | 184  | 1.4 | 0.5 | 1.9 | ↓ | -1.4 | 6.3E-04 | 8.7E-02 |
| chr3:71809713-71810562 | 850  | 5.0 | 4.6 | 5.3 | ↓ | -0.8 | 4.6E-08 | 5.2E-05 |
| chr3:72401839-72402211 | 373  | 4.0 | 3.7 | 4.3 | ↓ | -0.6 | 7.7E-05 | 2.2E-02 |
| chr3:73459253-73459859 | 607  | 3.4 | 3.0 | 3.8 | ↓ | -0.8 | 5.7E-05 | 1.8E-02 |
| chr3:74293929-74294423 | 495  | 3.9 | 3.5 | 4.3 | ↓ | -0.8 | 2.1E-04 | 4.5E-02 |
| chr3:7429790-7430045   | 256  | 3.6 | 3.2 | 3.9 | ↓ | -0.7 | 3.5E-05 | 1.2E-02 |
| chr3:74326777-74327092 | 316  | 2.7 | 3.0 | 2.1 | ↑ | 0.9  | 4.7E-04 | 7.4E-02 |
| chr3:74437817-74438407 | 591  | 3.9 | 3.5 | 4.2 | ↓ | -0.7 | 3.2E-04 | 5.9E-02 |
| chr3:74438496-74439318 | 823  | 5.2 | 5.4 | 4.9 | ↑ | 0.5  | 1.5E-05 | 6.2E-03 |
| chr3:74540330-74542845 | 2516 | 6.4 | 6.1 | 6.5 | ↓ | -0.4 | 7.8E-06 | 3.8E-03 |
| chr3:74849819-74850300 | 482  | 4.9 | 4.6 | 5.1 | ↓ | -0.5 | 6.5E-04 | 8.9E-02 |
| chr3:748511-750687     | 2177 | 7.0 | 6.8 | 7.1 | ↓ | -0.2 | 1.2E-04 | 3.0E-02 |
| chr3:750765-754135     | 3371 | 7.7 | 7.6 | 7.8 | ↓ | -0.2 | 5.3E-04 | 7.9E-02 |
| chr3:75198728-75199159 | 432  | 4.0 | 3.7 | 4.3 | ↓ | -0.5 | 5.7E-04 | 8.3E-02 |
| chr3:76622810-76623028 | 219  | 2.3 | 2.7 | 1.7 | ↑ | 1.0  | 3.9E-04 | 6.7E-02 |
| chr3:7687933-7688307   | 375  | 2.4 | 1.6 | 2.9 | ↓ | -1.3 | 3.5E-06 | 2.0E-03 |
| chr3:7691608-7691870   | 263  | 3.0 | 2.2 | 3.5 | ↓ | -1.4 | 6.4E-07 | 4.9E-04 |
| chr3:7692356-7692856   | 501  | 3.4 | 2.1 | 4.1 | ↓ | -2.0 | 1.4E-20 | 1.9E-16 |
| chr3:7692954-7693310   | 357  | 2.1 | 0.7 | 2.8 | ↓ | -2.2 | 4.8E-11 | 1.3E-07 |
| chr3:7695006-7695799   | 794  | 3.5 | 2.6 | 4.0 | ↓ | -1.4 | 3.1E-12 | 1.0E-08 |
| chr3:77018247-77018896 | 650  | 4.9 | 4.5 | 5.1 | ↓ | -0.6 | 1.3E-07 | 1.3E-04 |
| chr3:77045139-77045979 | 841  | 4.9 | 5.3 | 4.3 | ↑ | 1.0  | 5.3E-10 | 1.1E-06 |
| chr3:77734352-77734938 | 587  | 4.5 | 4.2 | 4.7 | ↓ | -0.5 | 6.0E-05 | 1.8E-02 |
| chr3:778187-779073     | 887  | 5.0 | 4.8 | 5.2 | ↓ | -0.4 | 1.5E-04 | 3.6E-02 |
| chr3:77857574-77857876 | 303  | 4.0 | 3.7 | 4.3 | ↓ | -0.6 | 7.7E-04 | 9.8E-02 |
| chr3:77896643-77897656 | 1014 | 4.5 | 4.1 | 4.9 | ↓ | -0.8 | 5.8E-09 | 8.1E-06 |
| chr3:7819035-7819323   | 289  | 2.8 | 3.2 | 2.2 | ↑ | 1.0  | 2.4E-04 | 4.9E-02 |

|                          |       |     |     |     |   |      |         |         |
|--------------------------|-------|-----|-----|-----|---|------|---------|---------|
| chr3:78263708-78263863   | 156   | 1.8 | 1.0 | 2.2 | ↓ | -1.2 | 4.9E-04 | 7.6E-02 |
| chr3:78959072-78959509   | 438   | 3.4 | 3.8 | 2.9 | ↑ | 0.9  | 4.3E-05 | 1.4E-02 |
| chr3:7918190-7918608     | 419   | 4.3 | 3.6 | 4.7 | ↓ | -1.1 | 6.9E-08 | 7.7E-05 |
| chr3:7919059-7922609     | 3551  | 7.1 | 7.4 | 6.7 | ↑ | 0.7  | 1.2E-15 | 7.8E-12 |
| chr3:793818-794943       | 1126  | 5.6 | 5.3 | 5.9 | ↓ | -0.7 | 6.1E-10 | 1.2E-06 |
| chr3:79423369-79424177   | 809   | 4.8 | 5.0 | 4.6 | ↑ | 0.4  | 2.2E-04 | 4.7E-02 |
| chr3:8002888-8003581     | 694   | 3.9 | 3.6 | 4.1 | ↓ | -0.6 | 5.6E-04 | 8.2E-02 |
| chr3:8005352-8005856     | 505   | 3.4 | 2.9 | 3.8 | ↓ | -0.9 | 1.0E-05 | 4.7E-03 |
| chr3:80103455-80103768   | 314   | 4.1 | 3.5 | 4.5 | ↓ | -1.0 | 3.6E-10 | 8.0E-07 |
| chr3:80134692-80135161   | 470   | 4.5 | 4.2 | 4.7 | ↓ | -0.5 | 4.7E-04 | 7.4E-02 |
| chr3:80946099-80946503   | 405   | 2.4 | 1.7 | 2.8 | ↓ | -1.1 | 2.9E-04 | 5.6E-02 |
| chr3:818028-821537       | 3510  | 7.9 | 7.8 | 8.0 | ↓ | -0.2 | 3.4E-06 | 2.0E-03 |
| chr3:82605125-82605428   | 304   | 2.7 | 2.1 | 3.2 | ↓ | -1.0 | 2.1E-05 | 7.9E-03 |
| chr3:82606554-82606938   | 385   | 3.5 | 3.1 | 3.8 | ↓ | -0.7 | 4.0E-04 | 6.8E-02 |
| chr3:82611637-82612662   | 1026  | 4.5 | 4.1 | 4.9 | ↓ | -0.8 | 1.5E-05 | 6.4E-03 |
| chr3:82613774-82614077   | 304   | 2.3 | 1.7 | 2.7 | ↓ | -1.1 | 1.8E-04 | 4.1E-02 |
| chr3:829315-829577       | 263   | 2.3 | 1.5 | 2.8 | ↓ | -1.3 | 8.9E-06 | 4.3E-03 |
| chr3:83473640-83473923   | 284   | 2.2 | 1.5 | 2.7 | ↓ | -1.2 | 1.3E-04 | 3.4E-02 |
| chr3:83625337-83625748   | 412   | 3.5 | 3.8 | 3.1 | ↑ | 0.7  | 1.0E-04 | 2.8E-02 |
| chr3:85323871-85324622   | 752   | 4.3 | 3.9 | 4.6 | ↓ | -0.6 | 1.8E-05 | 7.2E-03 |
| chr3:8573244-8573745     | 502   | 5.0 | 4.6 | 5.4 | ↓ | -0.7 | 1.1E-09 | 2.0E-06 |
| chr3:8600337-8600809     | 473   | 2.8 | 2.3 | 3.2 | ↓ | -0.9 | 3.5E-04 | 6.3E-02 |
| chr3:863259-863943       | 685   | 5.0 | 4.8 | 5.2 | ↓ | -0.4 | 5.0E-04 | 7.7E-02 |
| chr3:89945797-89946378   | 582   | 2.8 | 2.3 | 3.3 | ↓ | -1.0 | 2.8E-05 | 1.0E-02 |
| chr3:9007241-9007921     | 681   | 4.2 | 4.4 | 3.9 | ↑ | 0.6  | 1.1E-04 | 2.9E-02 |
| chr3:90138225-90138472   | 248   | 2.0 | 1.3 | 2.4 | ↓ | -1.1 | 6.2E-04 | 8.7E-02 |
| chr3:9092984-9093557     | 574   | 5.3 | 5.0 | 5.5 | ↓ | -0.5 | 1.7E-05 | 6.9E-03 |
| chr3:91604713-91605201   | 489   | 3.2 | 2.6 | 3.6 | ↓ | -1.0 | 3.2E-06 | 1.9E-03 |
| chr3:91986122-91986364   | 243   | 2.3 | 1.7 | 2.8 | ↓ | -1.1 | 2.0E-04 | 4.5E-02 |
| chr3:92233610-92234216   | 607   | 3.3 | 2.7 | 3.7 | ↓ | -0.9 | 3.1E-06 | 1.9E-03 |
| chr3:92269034-92269250   | 217   | 1.6 | 0.7 | 2.2 | ↓ | -1.5 | 4.8E-05 | 1.5E-02 |
| chr3:93988035-93988350   | 316   | 2.5 | 1.9 | 2.9 | ↓ | -1.1 | 8.1E-05 | 2.3E-02 |
| chr3:95923796-95924269   | 474   | 4.2 | 3.8 | 4.5 | ↓ | -0.7 | 5.0E-06 | 2.6E-03 |
| chr3:962341-963060       | 720   | 4.6 | 4.2 | 4.9 | ↓ | -0.7 | 2.3E-09 | 3.5E-06 |
| chr3:9636001-9636302     | 302   | 2.7 | 2.2 | 3.1 | ↓ | -0.9 | 2.7E-04 | 5.4E-02 |
| chr3:967770-970049       | 2280  | 6.7 | 6.4 | 6.8 | ↓ | -0.4 | 3.3E-06 | 1.9E-03 |
| chr3:97840818-97841099   | 282   | 2.9 | 3.3 | 2.4 | ↑ | 0.8  | 4.2E-04 | 6.9E-02 |
| chr3:978786-990981       | 12196 | 9.5 | 9.4 | 9.5 | ↓ | -0.1 | 6.9E-06 | 3.5E-03 |
| chr3:99816947-99819438   | 2492  | 6.1 | 5.9 | 6.2 | ↓ | -0.3 | 2.8E-04 | 5.5E-02 |
| chr3:99899693-99900022   | 330   | 3.3 | 2.8 | 3.7 | ↓ | -0.9 | 1.3E-05 | 5.7E-03 |
| chr3:999412-1001703      | 2292  | 6.6 | 6.5 | 6.8 | ↓ | -0.2 | 7.4E-04 | 9.5E-02 |
| chr4:102515908-102516163 | 256   | 2.4 | 2.8 | 1.8 | ↑ | 1.0  | 5.5E-04 | 9.9E-02 |
| chr4:10253876-10254318   | 443   | 3.0 | 2.5 | 3.4 | ↓ | -0.9 | 8.0E-05 | 2.7E-02 |
| chr4:102627458-102627756 | 299   | 2.7 | 3.1 | 2.0 | ↑ | 1.1  | 8.1E-06 | 4.6E-03 |
| chr4:103496823-103498759 | 1937  | 6.4 | 5.7 | 6.8 | ↓ | -1.1 | 3.2E-48 | 1.5E-43 |
| chr4:103724592-103725106 | 515   | 4.4 | 4.7 | 4.2 | ↑ | 0.5  | 4.2E-04 | 8.6E-02 |
| chr4:103744781-103745952 | 1172  | 5.1 | 5.3 | 4.9 | ↑ | 0.4  | 1.3E-04 | 4.0E-02 |

|                          |      |     |     |     |   |      |         |         |
|--------------------------|------|-----|-----|-----|---|------|---------|---------|
| chr4:104381861-104382110 | 250  | 1.8 | 2.3 | 1.1 | ↑ | 1.2  | 3.3E-04 | 7.3E-02 |
| chr4:106391378-106392708 | 1331 | 5.6 | 5.3 | 5.8 | ↓ | -0.4 | 2.7E-07 | 2.7E-04 |
| chr4:10836492-10836752   | 261  | 3.1 | 2.6 | 3.5 | ↓ | -0.9 | 4.3E-05 | 1.6E-02 |
| chr4:109866252-109867043 | 792  | 3.3 | 2.9 | 3.7 | ↓ | -0.8 | 7.8E-05 | 2.7E-02 |
| chr4:109900558-109901119 | 562  | 3.2 | 3.5 | 2.8 | ↑ | 0.7  | 5.5E-04 | 9.9E-02 |
| chr4:1100625-1101172     | 548  | 4.0 | 3.5 | 4.4 | ↓ | -0.9 | 1.5E-07 | 1.7E-04 |
| chr4:11064089-11065355   | 1267 | 5.3 | 4.9 | 5.6 | ↓ | -0.7 | 5.4E-10 | 1.2E-06 |
| chr4:110835623-110836394 | 772  | 4.7 | 4.2 | 5.0 | ↓ | -0.8 | 1.2E-10 | 3.7E-07 |
| chr4:110963721-110964136 | 416  | 2.2 | 2.7 | 1.5 | ↑ | 1.2  | 4.1E-05 | 1.5E-02 |
| chr4:11121279-11125125   | 3847 | 7.8 | 7.7 | 7.9 | ↓ | -0.2 | 6.1E-08 | 8.3E-05 |
| chr4:111576172-111576990 | 819  | 3.3 | 3.6 | 2.8 | ↑ | 0.8  | 1.6E-04 | 4.3E-02 |
| chr4:112016067-112016958 | 892  | 4.3 | 4.1 | 4.6 | ↓ | -0.5 | 4.4E-04 | 8.8E-02 |
| chr4:113144748-113146255 | 1508 | 5.9 | 6.1 | 5.7 | ↑ | 0.4  | 4.0E-04 | 8.3E-02 |
| chr4:113146518-113147332 | 815  | 5.3 | 5.0 | 5.5 | ↓ | -0.5 | 1.9E-07 | 2.0E-04 |
| chr4:113675243-113675608 | 366  | 2.2 | 2.6 | 1.5 | ↑ | 1.1  | 2.4E-04 | 5.9E-02 |
| chr4:113797350-113798342 | 993  | 4.6 | 4.2 | 4.9 | ↓ | -0.7 | 1.5E-06 | 1.1E-03 |
| chr4:114095325-114095580 | 256  | 2.2 | 2.7 | 1.5 | ↑ | 1.1  | 1.4E-04 | 4.1E-02 |
| chr4:114096686-114097450 | 765  | 3.8 | 3.3 | 4.1 | ↓ | -0.8 | 1.8E-05 | 8.5E-03 |
| chr4:114776757-114777498 | 742  | 3.4 | 3.7 | 3.0 | ↑ | 0.7  | 4.3E-04 | 8.7E-02 |
| chr4:114885480-114885914 | 435  | 2.6 | 3.1 | 2.1 | ↑ | 1.0  | 2.5E-04 | 6.2E-02 |
| chr4:114895923-114896315 | 393  | 3.3 | 3.6 | 2.8 | ↑ | 0.8  | 1.5E-04 | 4.2E-02 |
| chr4:115663613-115664264 | 652  | 4.0 | 3.6 | 4.4 | ↓ | -0.8 | 6.7E-05 | 2.4E-02 |
| chr4:116082756-116083347 | 592  | 3.5 | 3.9 | 3.0 | ↑ | 0.9  | 2.1E-06 | 1.5E-03 |
| chr4:116989219-116989484 | 266  | 2.5 | 2.9 | 1.9 | ↑ | 1.0  | 3.4E-04 | 7.3E-02 |
| chr4:118123779-118124138 | 360  | 3.2 | 2.6 | 3.7 | ↓ | -1.1 | 1.4E-05 | 7.0E-03 |
| chr4:118369946-118370590 | 645  | 2.7 | 2.2 | 3.1 | ↓ | -1.0 | 1.3E-04 | 4.0E-02 |
| chr4:118612901-118613215 | 315  | 3.1 | 2.6 | 3.4 | ↓ | -0.8 | 1.2E-04 | 3.8E-02 |
| chr4:118627167-118628680 | 1514 | 5.4 | 5.1 | 5.6 | ↓ | -0.5 | 1.2E-05 | 6.3E-03 |
| chr4:118659703-118660131 | 429  | 5.1 | 4.8 | 5.4 | ↓ | -0.6 | 7.9E-09 | 1.4E-05 |
| chr4:119062331-119062717 | 387  | 2.9 | 3.2 | 2.4 | ↑ | 0.8  | 3.1E-04 | 6.9E-02 |
| chr4:119413587-119413913 | 327  | 2.8 | 2.3 | 3.2 | ↓ | -0.8 | 5.4E-04 | 9.7E-02 |
| chr4:119950689-119951108 | 420  | 2.5 | 1.9 | 2.9 | ↓ | -1.0 | 2.9E-04 | 6.6E-02 |
| chr4:120218387-120219069 | 683  | 4.7 | 5.0 | 4.4 | ↑ | 0.6  | 2.4E-05 | 1.0E-02 |
| chr4:120508951-120509657 | 707  | 4.7 | 4.3 | 4.9 | ↓ | -0.7 | 2.5E-07 | 2.6E-04 |
| chr4:120691507-120691804 | 298  | 1.9 | 1.0 | 2.5 | ↓ | -1.5 | 1.2E-05 | 6.2E-03 |
| chr4:122330064-122330944 | 881  | 5.1 | 4.9 | 5.3 | ↓ | -0.4 | 5.1E-04 | 9.5E-02 |
| chr4:123674114-123674464 | 351  | 2.3 | 1.7 | 2.8 | ↓ | -1.1 | 2.0E-04 | 5.2E-02 |
| chr4:12416929-12417554   | 626  | 3.7 | 4.0 | 3.3 | ↑ | 0.6  | 2.8E-04 | 6.6E-02 |
| chr4:127198870-127199325 | 456  | 2.5 | 1.9 | 2.9 | ↓ | -1.0 | 1.6E-04 | 4.4E-02 |
| chr4:127488249-127488797 | 549  | 2.6 | 2.0 | 3.0 | ↓ | -1.0 | 1.8E-04 | 4.7E-02 |
| chr4:128630391-128630883 | 493  | 3.2 | 2.8 | 3.5 | ↓ | -0.7 | 2.3E-04 | 5.7E-02 |
| chr4:128982617-128983886 | 1270 | 4.7 | 4.3 | 5.0 | ↓ | -0.7 | 5.0E-07 | 4.4E-04 |
| chr4:129406227-129406557 | 331  | 2.4 | 1.9 | 2.8 | ↓ | -1.0 | 4.8E-04 | 9.1E-02 |
| chr4:13011444-13012364   | 921  | 3.8 | 3.3 | 4.1 | ↓ | -0.8 | 5.8E-06 | 3.6E-03 |
| chr4:130551991-130552278 | 288  | 2.2 | 1.6 | 2.7 | ↓ | -1.1 | 1.8E-04 | 4.8E-02 |
| chr4:132365124-132365369 | 246  | 2.3 | 1.6 | 2.7 | ↓ | -1.1 | 1.6E-04 | 4.5E-02 |
| chr4:132497517-132498069 | 553  | 3.9 | 4.2 | 3.6 | ↑ | 0.6  | 4.6E-04 | 9.0E-02 |

|                          |      |     |     |     |   |      |         |         |
|--------------------------|------|-----|-----|-----|---|------|---------|---------|
| chr4:132518468-132519528 | 1061 | 5.9 | 5.7 | 6.0 | ↓ | -0.4 | 4.3E-04 | 8.7E-02 |
| chr4:132765477-132766450 | 974  | 5.4 | 5.1 | 5.6 | ↓ | -0.5 | 7.5E-06 | 4.4E-03 |
| chr4:132903572-132903840 | 269  | 2.0 | 1.3 | 2.5 | ↓ | -1.2 | 2.9E-04 | 6.6E-02 |
| chr4:132982487-132983009 | 523  | 4.2 | 3.7 | 4.5 | ↓ | -0.8 | 3.6E-06 | 2.4E-03 |
| chr4:133000183-133000490 | 308  | 2.6 | 2.0 | 3.1 | ↓ | -1.1 | 3.3E-04 | 7.3E-02 |
| chr4:133038943-133039393 | 451  | 3.9 | 3.2 | 4.3 | ↓ | -1.1 | 2.6E-09 | 5.1E-06 |
| chr4:133058750-133059697 | 948  | 3.4 | 2.9 | 3.8 | ↓ | -0.9 | 5.0E-05 | 1.8E-02 |
| chr4:133337438-133337796 | 359  | 2.1 | 2.6 | 1.4 | ↑ | 1.2  | 9.5E-05 | 3.1E-02 |
| chr4:133664833-133665378 | 546  | 3.9 | 4.2 | 3.6 | ↑ | 0.7  | 7.8E-05 | 2.7E-02 |
| chr4:133670153-133671154 | 1002 | 4.8 | 4.4 | 5.1 | ↓ | -0.7 | 5.1E-06 | 3.2E-03 |
| chr4:133913268-133913760 | 493  | 3.8 | 3.2 | 4.2 | ↓ | -1.0 | 4.2E-08 | 6.1E-05 |
| chr4:134049959-134050271 | 313  | 2.2 | 2.7 | 1.5 | ↑ | 1.2  | 1.1E-04 | 3.4E-02 |
| chr4:134109969-134110473 | 505  | 2.8 | 2.0 | 3.2 | ↓ | -1.2 | 6.0E-07 | 5.1E-04 |
| chr4:134115245-134116357 | 1113 | 5.6 | 5.4 | 5.7 | ↓ | -0.3 | 5.1E-04 | 9.5E-02 |
| chr4:134145139-134146284 | 1146 | 4.7 | 4.4 | 5.0 | ↓ | -0.6 | 2.8E-05 | 1.2E-02 |
| chr4:134192528-134193464 | 937  | 3.9 | 3.5 | 4.3 | ↓ | -0.7 | 1.0E-05 | 5.5E-03 |
| chr4:134253686-134254248 | 563  | 3.3 | 2.8 | 3.7 | ↓ | -0.9 | 3.3E-05 | 1.3E-02 |
| chr4:134255987-134256233 | 247  | 2.1 | 1.3 | 2.6 | ↓ | -1.3 | 9.4E-05 | 3.1E-02 |
| chr4:134258991-134259491 | 501  | 2.5 | 1.7 | 3.0 | ↓ | -1.2 | 5.8E-06 | 3.6E-03 |
| chr4:134259832-134262630 | 2799 | 6.6 | 6.5 | 6.8 | ↓ | -0.4 | 8.6E-05 | 2.9E-02 |
| chr4:134262868-134265368 | 2501 | 5.8 | 5.2 | 6.3 | ↓ | -1.1 | 7.0E-38 | 1.6E-33 |
| chr4:134265942-134266943 | 1002 | 3.5 | 2.7 | 4.0 | ↓ | -1.2 | 8.7E-10 | 1.9E-06 |
| chr4:134285330-134285769 | 440  | 3.1 | 2.2 | 3.7 | ↓ | -1.5 | 3.3E-11 | 1.2E-07 |
| chr4:134388949-134389262 | 314  | 2.7 | 2.0 | 3.1 | ↓ | -1.1 | 1.4E-05 | 7.0E-03 |
| chr4:1347353-1347949     | 597  | 4.2 | 3.7 | 4.6 | ↓ | -0.8 | 1.4E-07 | 1.6E-04 |
| chr4:134837825-134838191 | 367  | 2.6 | 2.0 | 3.0 | ↓ | -0.9 | 2.8E-04 | 6.6E-02 |
| chr4:134882211-134882626 | 416  | 4.3 | 4.1 | 4.6 | ↓ | -0.5 | 4.7E-04 | 9.1E-02 |
| chr4:135203821-135204130 | 310  | 1.9 | 2.4 | 1.1 | ↑ | 1.4  | 2.9E-05 | 1.2E-02 |
| chr4:136195177-136196444 | 1268 | 4.0 | 3.2 | 4.5 | ↓ | -1.3 | 1.6E-07 | 1.7E-04 |
| chr4:136196668-136199318 | 2651 | 6.8 | 6.0 | 7.4 | ↓ | -1.4 | 1.0E-16 | 1.1E-12 |
| chr4:136201329-136201873 | 545  | 3.7 | 3.1 | 4.1 | ↓ | -1.1 | 1.2E-07 | 1.4E-04 |
| chr4:136246971-136247484 | 514  | 3.6 | 2.9 | 4.1 | ↓ | -1.1 | 4.6E-07 | 4.2E-04 |
| chr4:136333212-136334540 | 1329 | 5.1 | 4.7 | 5.3 | ↓ | -0.6 | 1.3E-05 | 6.6E-03 |
| chr4:136683737-136685316 | 1580 | 5.8 | 5.5 | 6.0 | ↓ | -0.5 | 7.6E-06 | 4.4E-03 |
| chr4:137582151-137582802 | 652  | 4.1 | 3.6 | 4.5 | ↓ | -0.9 | 3.7E-06 | 2.4E-03 |
| chr4:137602340-137603944 | 1605 | 5.6 | 5.2 | 5.9 | ↓ | -0.7 | 1.6E-08 | 2.5E-05 |
| chr4:138388303-138388625 | 323  | 2.3 | 1.7 | 2.8 | ↓ | -1.1 | 2.9E-04 | 6.6E-02 |
| chr4:13859096-13859438   | 343  | 3.0 | 2.5 | 3.4 | ↓ | -0.9 | 1.8E-04 | 4.8E-02 |
| chr4:138669486-138669821 | 336  | 2.2 | 2.6 | 1.5 | ↑ | 1.1  | 4.5E-04 | 8.9E-02 |
| chr4:139256805-139257250 | 446  | 3.3 | 2.7 | 3.7 | ↓ | -1.0 | 8.8E-06 | 4.8E-03 |
| chr4:139257261-139258688 | 1428 | 5.8 | 5.6 | 6.1 | ↓ | -0.4 | 2.2E-04 | 5.6E-02 |
| chr4:139497038-139497892 | 855  | 4.2 | 3.9 | 4.5 | ↓ | -0.6 | 8.9E-05 | 3.0E-02 |
| chr4:139761156-139761951 | 796  | 5.7 | 5.5 | 5.9 | ↓ | -0.4 | 3.4E-04 | 7.3E-02 |
| chr4:140055792-140057644 | 1853 | 6.1 | 6.0 | 6.3 | ↓ | -0.3 | 2.0E-05 | 8.8E-03 |
| chr4:140157860-140158914 | 1055 | 5.2 | 4.9 | 5.4 | ↓ | -0.5 | 3.6E-04 | 7.8E-02 |
| chr4:141115780-141116139 | 360  | 2.9 | 2.4 | 3.2 | ↓ | -0.9 | 2.7E-04 | 6.4E-02 |
| chr4:141119774-141122812 | 3039 | 6.6 | 6.4 | 6.7 | ↓ | -0.3 | 1.7E-05 | 7.9E-03 |

|                          |      |     |     |     |   |      |         |         |
|--------------------------|------|-----|-----|-----|---|------|---------|---------|
| chr4:141288524-141290534 | 2011 | 6.5 | 6.3 | 6.7 | ↓ | -0.3 | 1.9E-05 | 8.6E-03 |
| chr4:141379653-141380408 | 756  | 4.1 | 3.7 | 4.4 | ↓ | -0.7 | 5.2E-04 | 9.5E-02 |
| chr4:141410274-141410707 | 434  | 3.7 | 3.3 | 4.0 | ↓ | -0.7 | 2.7E-04 | 6.5E-02 |
| chr4:14142238-14142731   | 494  | 2.6 | 1.8 | 3.2 | ↓ | -1.4 | 9.1E-07 | 6.9E-04 |
| chr4:141520940-141521642 | 703  | 5.0 | 4.7 | 5.2 | ↓ | -0.5 | 9.8E-05 | 3.1E-02 |
| chr4:141710648-141710974 | 327  | 2.3 | 2.7 | 1.5 | ↑ | 1.2  | 1.0E-04 | 3.2E-02 |
| chr4:141934644-141935209 | 566  | 4.0 | 4.3 | 3.6 | ↑ | 0.7  | 2.3E-05 | 9.8E-03 |
| chr4:142231712-142232106 | 395  | 3.8 | 3.5 | 4.1 | ↓ | -0.6 | 4.7E-04 | 9.0E-02 |
| chr4:14622472-14622796   | 325  | 2.5 | 3.0 | 1.9 | ↑ | 1.0  | 1.6E-04 | 4.5E-02 |
| chr4:15626422-15628839   | 2418 | 6.6 | 6.8 | 6.5 | ↑ | 0.3  | 2.7E-04 | 6.5E-02 |
| chr4:16497139-16497527   | 389  | 2.3 | 2.8 | 1.7 | ↑ | 1.0  | 1.8E-04 | 4.7E-02 |
| chr4:1672134-1673223     | 1090 | 5.5 | 5.3 | 5.7 | ↓ | -0.4 | 2.8E-04 | 6.6E-02 |
| chr4:18103954-18104222   | 269  | 1.9 | 2.4 | 1.1 | ↑ | 1.3  | 1.3E-04 | 4.0E-02 |
| chr4:18110262-18111272   | 1011 | 5.4 | 5.2 | 5.6 | ↓ | -0.4 | 8.9E-05 | 3.0E-02 |
| chr4:18117139-18117546   | 408  | 2.8 | 3.2 | 2.3 | ↑ | 0.9  | 1.9E-04 | 4.8E-02 |
| chr4:18138456-18138744   | 289  | 3.8 | 4.1 | 3.3 | ↑ | 0.7  | 1.1E-04 | 3.6E-02 |
| chr4:19958855-19959234   | 380  | 3.5 | 3.1 | 3.9 | ↓ | -0.8 | 3.8E-05 | 1.5E-02 |
| chr4:20323177-20323601   | 425  | 3.4 | 3.7 | 2.9 | ↑ | 0.8  | 2.2E-04 | 5.6E-02 |
| chr4:20336612-20336915   | 304  | 2.3 | 0.9 | 3.0 | ↓ | -2.1 | 6.8E-12 | 3.4E-08 |
| chr4:20338816-20340015   | 1200 | 4.7 | 4.2 | 5.1 | ↓ | -0.9 | 2.2E-10 | 5.9E-07 |
| chr4:22250336-22250657   | 322  | 2.3 | 1.7 | 2.7 | ↓ | -1.0 | 4.6E-04 | 9.0E-02 |
| chr4:24657542-24658005   | 464  | 3.7 | 2.8 | 4.3 | ↓ | -1.4 | 3.0E-13 | 1.9E-09 |
| chr4:24705941-24706270   | 330  | 1.9 | 1.2 | 2.3 | ↓ | -1.1 | 4.5E-04 | 8.9E-02 |
| chr4:2477256-2478806     | 1551 | 6.2 | 6.0 | 6.4 | ↓ | -0.3 | 1.7E-04 | 4.6E-02 |
| chr4:24830113-24830607   | 495  | 3.3 | 2.9 | 3.7 | ↓ | -0.8 | 1.5E-04 | 4.2E-02 |
| chr4:26503625-26504343   | 719  | 5.4 | 5.2 | 5.5 | ↓ | -0.4 | 3.8E-05 | 1.5E-02 |
| chr4:27592826-27593446   | 621  | 2.8 | 1.9 | 3.4 | ↓ | -1.5 | 2.0E-09 | 4.1E-06 |
| chr4:27600072-27600591   | 520  | 2.4 | 1.6 | 3.0 | ↓ | -1.3 | 1.8E-06 | 1.2E-03 |
| chr4:2896565-2899110     | 2546 | 6.6 | 6.4 | 6.8 | ↓ | -0.3 | 1.4E-06 | 1.0E-03 |
| chr4:29044796-29045293   | 498  | 3.1 | 2.5 | 3.5 | ↓ | -0.9 | 4.5E-04 | 8.9E-02 |
| chr4:29212826-29213015   | 190  | 1.5 | 0.8 | 2.1 | ↓ | -1.3 | 5.1E-04 | 9.5E-02 |
| chr4:30193577-30194043   | 467  | 2.6 | 2.9 | 2.1 | ↑ | 0.9  | 5.1E-04 | 9.5E-02 |
| chr4:31923557-31925281   | 1725 | 5.9 | 6.1 | 5.8 | ↑ | 0.3  | 2.1E-04 | 5.4E-02 |
| chr4:32655094-32655513   | 420  | 2.5 | 1.7 | 3.1 | ↓ | -1.4 | 4.9E-07 | 4.4E-04 |
| chr4:3487613-3488282     | 670  | 4.0 | 3.6 | 4.3 | ↓ | -0.7 | 3.1E-05 | 1.3E-02 |
| chr4:34925983-34927514   | 1532 | 5.0 | 4.7 | 5.3 | ↓ | -0.5 | 1.7E-05 | 8.0E-03 |
| chr4:35548729-35549156   | 428  | 2.4 | 1.8 | 2.9 | ↓ | -1.0 | 5.3E-04 | 9.6E-02 |
| chr4:3627222-3627866     | 645  | 3.7 | 3.3 | 4.0 | ↓ | -0.7 | 2.8E-04 | 6.6E-02 |
| chr4:37320657-37321088   | 432  | 2.5 | 1.9 | 2.9 | ↓ | -1.0 | 3.0E-04 | 6.8E-02 |
| chr4:37541904-37544140   | 2237 | 5.9 | 5.6 | 6.1 | ↓ | -0.5 | 1.1E-10 | 3.5E-07 |
| chr4:37545323-37547487   | 2165 | 5.4 | 5.1 | 5.6 | ↓ | -0.5 | 1.6E-05 | 7.7E-03 |
| chr4:3820309-3821983     | 1675 | 5.7 | 5.5 | 5.9 | ↓ | -0.4 | 4.5E-06 | 2.9E-03 |
| chr4:38289539-38290456   | 918  | 5.3 | 5.0 | 5.6 | ↓ | -0.5 | 2.1E-05 | 9.1E-03 |
| chr4:38369187-38369434   | 248  | 1.9 | 0.9 | 2.5 | ↓ | -1.5 | 5.9E-06 | 3.6E-03 |
| chr4:38586311-38587045   | 735  | 3.4 | 2.8 | 3.8 | ↓ | -1.0 | 7.7E-07 | 6.2E-04 |
| chr4:3904136-3908068     | 3933 | 7.9 | 7.9 | 8.0 | ↓ | -0.1 | 1.4E-04 | 4.1E-02 |
| chr4:3982311-3984927     | 2617 | 7.3 | 7.2 | 7.4 | ↓ | -0.2 | 1.3E-04 | 4.0E-02 |

|                        |      |     |     |     |   |      |         |         |
|------------------------|------|-----|-----|-----|---|------|---------|---------|
| chr4:3988004-3989065   | 1062 | 5.3 | 4.8 | 5.7 | ↓ | -0.9 | 2.5E-10 | 5.9E-07 |
| chr4:40027897-40028199 | 303  | 2.6 | 2.0 | 3.1 | ↓ | -1.1 | 7.7E-06 | 4.4E-03 |
| chr4:4006856-4007449   | 594  | 3.8 | 3.1 | 4.3 | ↓ | -1.2 | 4.4E-13 | 2.5E-09 |
| chr4:4116198-4116748   | 551  | 3.7 | 3.3 | 4.0 | ↓ | -0.8 | 2.0E-05 | 8.9E-03 |
| chr4:4136845-4137456   | 612  | 3.9 | 3.6 | 4.2 | ↓ | -0.6 | 1.4E-04 | 4.1E-02 |
| chr4:4178693-4178969   | 277  | 2.0 | 1.3 | 2.5 | ↓ | -1.2 | 4.2E-04 | 8.6E-02 |
| chr4:41959445-41959717 | 273  | 1.9 | 1.2 | 2.4 | ↓ | -1.2 | 4.0E-04 | 8.3E-02 |
| chr4:43106859-43107394 | 536  | 4.2 | 4.4 | 3.8 | ↑ | 0.6  | 1.3E-04 | 4.0E-02 |
| chr4:43446358-43446684 | 327  | 2.4 | 1.8 | 2.8 | ↓ | -1.0 | 4.9E-04 | 9.2E-02 |
| chr4:43984014-43985330 | 1317 | 4.5 | 4.1 | 4.7 | ↓ | -0.6 | 2.9E-04 | 6.6E-02 |
| chr4:44109624-44110699 | 1076 | 4.5 | 4.2 | 4.9 | ↓ | -0.7 | 1.4E-07 | 1.6E-04 |
| chr4:4553362-4554384   | 1023 | 4.4 | 4.0 | 4.6 | ↓ | -0.6 | 3.3E-05 | 1.3E-02 |
| chr4:48230450-48230673 | 224  | 2.3 | 2.8 | 1.7 | ↑ | 1.0  | 3.8E-04 | 8.0E-02 |
| chr4:4916705-4918049   | 1345 | 5.8 | 5.0 | 6.4 | ↓ | -1.4 | 1.5E-22 | 2.2E-18 |
| chr4:54077033-54077668 | 636  | 4.3 | 4.0 | 4.5 | ↓ | -0.5 | 4.1E-04 | 8.5E-02 |
| chr4:54191846-54192209 | 364  | 2.9 | 2.4 | 3.3 | ↓ | -0.9 | 2.3E-04 | 5.8E-02 |
| chr4:54695381-54695633 | 253  | 1.8 | 1.1 | 2.3 | ↓ | -1.2 | 4.2E-04 | 8.6E-02 |
| chr4:55631462-55631853 | 392  | 3.3 | 2.7 | 3.8 | ↓ | -1.1 | 3.7E-07 | 3.4E-04 |
| chr4:55634849-55635219 | 371  | 3.7 | 3.2 | 4.1 | ↓ | -0.9 | 2.3E-07 | 2.4E-04 |
| chr4:55636252-55636939 | 688  | 4.2 | 3.8 | 4.5 | ↓ | -0.6 | 2.6E-05 | 1.1E-02 |
| chr4:56202018-56202374 | 357  | 2.2 | 2.7 | 1.5 | ↑ | 1.2  | 4.9E-05 | 1.8E-02 |
| chr4:5656427-5657058   | 632  | 3.4 | 3.0 | 3.7 | ↓ | -0.7 | 4.3E-04 | 8.7E-02 |
| chr4:5850056-5850563   | 508  | 3.9 | 3.2 | 4.4 | ↓ | -1.3 | 2.3E-10 | 5.9E-07 |
| chr4:5910533-5911491   | 959  | 4.8 | 4.3 | 5.1 | ↓ | -0.8 | 4.7E-11 | 1.6E-07 |
| chr4:59117799-59118218 | 420  | 3.1 | 2.6 | 3.4 | ↓ | -0.8 | 5.2E-04 | 9.5E-02 |
| chr4:5954276-5955343   | 1068 | 5.8 | 5.6 | 6.0 | ↓ | -0.3 | 2.0E-05 | 8.9E-03 |
| chr4:59605795-59606227 | 433  | 2.5 | 1.8 | 3.0 | ↓ | -1.2 | 1.2E-05 | 6.2E-03 |
| chr4:59846018-59846445 | 428  | 2.4 | 1.8 | 2.8 | ↓ | -1.0 | 2.7E-04 | 6.4E-02 |
| chr4:59848115-59848385 | 271  | 1.5 | 0.7 | 2.0 | ↓ | -1.4 | 3.0E-04 | 6.8E-02 |
| chr4:60575694-60575927 | 234  | 1.8 | 2.3 | 1.0 | ↑ | 1.3  | 3.0E-04 | 6.8E-02 |
| chr4:60698462-60698735 | 274  | 2.3 | 1.7 | 2.8 | ↓ | -1.1 | 1.6E-04 | 4.4E-02 |
| chr4:6267641-6268417   | 777  | 5.0 | 4.5 | 5.3 | ↓ | -0.8 | 5.9E-08 | 8.2E-05 |
| chr4:63496739-63497064 | 326  | 2.7 | 2.0 | 3.1 | ↓ | -1.1 | 2.6E-05 | 1.1E-02 |
| chr4:63497078-63497388 | 311  | 2.6 | 1.6 | 3.2 | ↓ | -1.5 | 1.2E-07 | 1.4E-04 |
| chr4:63648163-63649572 | 1410 | 4.8 | 4.1 | 5.3 | ↓ | -1.2 | 6.8E-16 | 6.1E-12 |
| chr4:6375556-6376362   | 807  | 3.9 | 3.5 | 4.2 | ↓ | -0.7 | 1.8E-05 | 8.4E-03 |
| chr4:64879031-64879578 | 548  | 3.7 | 3.2 | 4.1 | ↓ | -0.9 | 1.1E-07 | 1.4E-04 |
| chr4:66857283-66857713 | 431  | 2.8 | 3.2 | 2.0 | ↑ | 1.2  | 5.8E-07 | 5.0E-04 |
| chr4:67624029-67625201 | 1173 | 4.7 | 4.4 | 5.0 | ↓ | -0.6 | 9.8E-06 | 5.4E-03 |
| chr4:67626775-67627110 | 336  | 3.0 | 2.5 | 3.3 | ↓ | -0.9 | 4.5E-04 | 8.9E-02 |
| chr4:69287604-69287953 | 350  | 2.2 | 1.5 | 2.6 | ↓ | -1.1 | 4.6E-04 | 9.0E-02 |
| chr4:70694872-70695268 | 397  | 3.2 | 2.3 | 3.8 | ↓ | -1.5 | 2.6E-11 | 1.1E-07 |
| chr4:70695524-70697284 | 1761 | 4.7 | 4.0 | 5.1 | ↓ | -1.1 | 1.3E-11 | 5.7E-08 |
| chr4:70698105-70698706 | 602  | 3.6 | 3.0 | 4.0 | ↓ | -1.1 | 1.2E-07 | 1.4E-04 |
| chr4:70698752-70699187 | 436  | 3.4 | 2.7 | 3.9 | ↓ | -1.1 | 1.1E-08 | 1.9E-05 |
| chr4:70699195-70700490 | 1296 | 4.7 | 4.0 | 5.1 | ↓ | -1.1 | 2.4E-15 | 1.8E-11 |
| chr4:70700852-70701288 | 437  | 3.4 | 2.8 | 3.9 | ↓ | -1.1 | 1.2E-06 | 8.9E-04 |



|                        |      |     |     |     |   |      |         |         |
|------------------------|------|-----|-----|-----|---|------|---------|---------|
| chr4:70704509-70704793 | 285  | 2.2 | 1.4 | 2.7 | ↓ | -1.4 | 5.5E-06 | 3.4E-03 |
| chr4:70812063-70812599 | 537  | 3.5 | 3.8 | 3.1 | ↑ | 0.8  | 4.5E-05 | 1.7E-02 |
| chr4:70825633-70828172 | 2540 | 6.5 | 6.7 | 6.2 | ↑ | 0.5  | 1.4E-08 | 2.2E-05 |
| chr4:70830764-70835175 | 4412 | 7.2 | 7.4 | 7.0 | ↑ | 0.4  | 5.1E-05 | 1.8E-02 |
| chr4:70835246-70837021 | 1776 | 5.2 | 5.4 | 4.8 | ↑ | 0.6  | 2.9E-07 | 2.8E-04 |
| chr4:7087516-7088031   | 516  | 4.4 | 4.1 | 4.7 | ↓ | -0.6 | 3.7E-04 | 7.9E-02 |
| chr4:71351988-71352331 | 344  | 2.8 | 2.2 | 3.3 | ↓ | -1.1 | 1.2E-05 | 6.3E-03 |
| chr4:71585376-71585697 | 322  | 3.2 | 3.5 | 2.8 | ↑ | 0.7  | 5.2E-04 | 9.5E-02 |
| chr4:73019542-73019946 | 405  | 2.1 | 1.1 | 2.7 | ↓ | -1.5 | 3.0E-06 | 2.0E-03 |
| chr4:74866954-74867630 | 677  | 5.5 | 5.2 | 5.7 | ↓ | -0.4 | 4.8E-04 | 9.2E-02 |
| chr4:75792601-75793149 | 549  | 5.0 | 4.8 | 5.2 | ↓ | -0.5 | 1.4E-04 | 4.1E-02 |
| chr4:75885109-75885637 | 529  | 3.1 | 3.5 | 2.7 | ↑ | 0.7  | 5.5E-04 | 9.9E-02 |
| chr4:76548896-76549481 | 586  | 3.3 | 2.7 | 3.7 | ↓ | -1.0 | 1.2E-06 | 8.9E-04 |
| chr4:7718687-7722434   | 3748 | 6.7 | 6.8 | 6.6 | ↑ | 0.2  | 3.6E-05 | 1.4E-02 |
| chr4:77379435-77379848 | 414  | 3.0 | 3.4 | 2.6 | ↑ | 0.8  | 2.2E-04 | 5.6E-02 |
| chr4:78103838-78104239 | 402  | 3.2 | 2.6 | 3.7 | ↓ | -1.0 | 9.4E-05 | 3.1E-02 |
| chr4:78131582-78132014 | 433  | 4.2 | 3.8 | 4.5 | ↓ | -0.7 | 6.7E-06 | 4.0E-03 |
| chr4:78935914-78936751 | 838  | 4.9 | 4.6 | 5.1 | ↓ | -0.5 | 3.9E-05 | 1.5E-02 |
| chr4:79075980-79076444 | 465  | 5.1 | 4.7 | 5.5 | ↓ | -0.8 | 5.2E-09 | 9.6E-06 |
| chr4:80727194-80727555 | 362  | 3.4 | 3.8 | 2.8 | ↑ | 1.0  | 4.5E-05 | 1.7E-02 |
| chr4:80912218-80912543 | 326  | 2.1 | 1.3 | 2.6 | ↓ | -1.3 | 9.8E-05 | 3.1E-02 |
| chr4:80912938-80913304 | 367  | 2.3 | 2.8 | 1.7 | ↑ | 1.1  | 1.4E-04 | 4.1E-02 |
| chr4:81345067-81345489 | 423  | 3.9 | 3.4 | 4.3 | ↓ | -0.9 | 8.1E-07 | 6.4E-04 |
| chr4:81532356-81532622 | 267  | 1.7 | 2.2 | 0.9 | ↑ | 1.3  | 4.3E-04 | 8.7E-02 |
| chr4:82077266-82077619 | 354  | 2.4 | 1.8 | 2.8 | ↓ | -1.0 | 3.7E-04 | 7.8E-02 |
| chr4:82167575-82168381 | 807  | 3.6 | 3.2 | 4.0 | ↓ | -0.8 | 7.9E-05 | 2.7E-02 |
| chr4:83672857-83674218 | 1362 | 4.7 | 4.4 | 4.9 | ↓ | -0.6 | 3.3E-05 | 1.3E-02 |
| chr4:83975859-83977529 | 1671 | 4.9 | 4.6 | 5.1 | ↓ | -0.5 | 3.2E-04 | 7.1E-02 |
| chr4:84044525-84046652 | 2128 | 6.6 | 6.3 | 6.8 | ↓ | -0.5 | 6.8E-07 | 5.6E-04 |
| chr4:84388946-84389641 | 696  | 4.2 | 3.8 | 4.4 | ↓ | -0.6 | 1.8E-05 | 8.5E-03 |
| chr4:84624940-84625427 | 488  | 2.3 | 2.7 | 1.8 | ↑ | 1.0  | 4.9E-04 | 9.2E-02 |
| chr4:84958451-84959227 | 777  | 4.6 | 4.3 | 4.8 | ↓ | -0.5 | 1.0E-04 | 3.2E-02 |
| chr4:85128059-85128653 | 595  | 5.0 | 4.6 | 5.3 | ↓ | -0.7 | 5.4E-09 | 9.6E-06 |
| chr4:8530082-8530390   | 309  | 3.2 | 2.7 | 3.5 | ↓ | -0.8 | 7.7E-05 | 2.7E-02 |
| chr4:85713057-85713408 | 352  | 2.4 | 1.7 | 2.9 | ↓ | -1.2 | 4.1E-05 | 1.5E-02 |
| chr4:86514918-86515439 | 522  | 3.9 | 3.4 | 4.3 | ↓ | -0.9 | 6.9E-06 | 4.0E-03 |
| chr4:8668324-8668895   | 572  | 4.2 | 3.7 | 4.6 | ↓ | -0.9 | 9.1E-07 | 6.9E-04 |
| chr4:8676834-8677395   | 562  | 3.4 | 3.0 | 3.8 | ↓ | -0.8 | 7.9E-05 | 2.7E-02 |
| chr4:8730537-8731054   | 518  | 3.5 | 2.8 | 3.9 | ↓ | -1.1 | 7.1E-07 | 5.8E-04 |
| chr4:8753002-8753838   | 837  | 4.4 | 4.0 | 4.6 | ↓ | -0.6 | 1.4E-04 | 4.1E-02 |
| chr4:88045615-88046472 | 858  | 4.7 | 4.4 | 4.9 | ↓ | -0.5 | 1.4E-04 | 4.1E-02 |
| chr4:88205987-88206545 | 559  | 3.0 | 2.5 | 3.3 | ↓ | -0.9 | 4.9E-04 | 9.2E-02 |
| chr4:88393860-88394241 | 382  | 3.5 | 2.7 | 4.0 | ↓ | -1.3 | 2.4E-10 | 5.9E-07 |
| chr4:8919231-8920634   | 1404 | 6.3 | 6.1 | 6.5 | ↓ | -0.3 | 3.9E-04 | 8.1E-02 |
| chr4:90315111-90315913 | 803  | 4.6 | 4.2 | 5.0 | ↓ | -0.8 | 2.7E-08 | 4.1E-05 |
| chr4:90482884-90483252 | 369  | 3.8 | 3.4 | 4.1 | ↓ | -0.6 | 3.2E-04 | 7.1E-02 |
| chr4:91400911-91401307 | 397  | 4.6 | 4.2 | 4.9 | ↓ | -0.7 | 2.5E-04 | 6.1E-02 |

|                          |      |     |     |     |   |      |         |         |
|--------------------------|------|-----|-----|-----|---|------|---------|---------|
| chr4:91484180-91485054   | 875  | 3.4 | 3.0 | 3.8 | ↓ | -0.8 | 1.6E-04 | 4.5E-02 |
| chr4:92304214-92304523   | 310  | 2.4 | 1.7 | 2.8 | ↓ | -1.1 | 1.8E-04 | 4.8E-02 |
| chr4:92736772-92737078   | 307  | 2.7 | 2.2 | 3.1 | ↓ | -0.9 | 4.9E-04 | 9.2E-02 |
| chr4:92982511-92982861   | 351  | 3.5 | 3.1 | 3.8 | ↓ | -0.7 | 2.8E-04 | 6.6E-02 |
| chr4:93363835-93364637   | 803  | 4.0 | 3.4 | 4.4 | ↓ | -1.0 | 2.9E-07 | 2.8E-04 |
| chr4:93717932-93720352   | 2421 | 6.3 | 6.5 | 6.1 | ↑ | 0.4  | 1.6E-04 | 4.5E-02 |
| chr4:94507794-94508326   | 533  | 3.9 | 3.5 | 4.3 | ↓ | -0.8 | 2.9E-04 | 6.6E-02 |
| chr4:9696856-9697169     | 314  | 2.4 | 1.6 | 2.8 | ↓ | -1.2 | 1.6E-05 | 7.9E-03 |
| chr4:97937728-97938169   | 442  | 2.7 | 2.1 | 3.1 | ↓ | -0.9 | 3.3E-04 | 7.3E-02 |
| chr4:98325252-98325774   | 523  | 3.0 | 3.3 | 2.5 | ↑ | 0.8  | 1.3E-04 | 4.0E-02 |
| chr5:100289379-100289731 | 353  | 3.2 | 2.9 | 3.5 | ↓ | -0.7 | 6.3E-04 | 8.7E-02 |
| chr5:10203741-10204530   | 790  | 5.3 | 4.8 | 5.6 | ↓ | -0.8 | 5.9E-11 | 2.3E-07 |
| chr5:102884436-102885562 | 1127 | 4.6 | 4.4 | 4.8 | ↓ | -0.4 | 3.9E-04 | 6.6E-02 |
| chr5:103119948-103120680 | 733  | 3.7 | 3.2 | 4.1 | ↓ | -0.9 | 1.3E-06 | 8.5E-04 |
| chr5:103152063-103152330 | 268  | 2.3 | 2.8 | 1.7 | ↑ | 1.0  | 1.9E-04 | 4.1E-02 |
| chr5:103152464-103153287 | 824  | 3.3 | 3.7 | 2.7 | ↑ | 1.0  | 3.7E-06 | 2.1E-03 |
| chr5:103255864-103256380 | 517  | 3.4 | 3.8 | 3.0 | ↑ | 0.7  | 2.9E-04 | 5.4E-02 |
| chr5:1034106-1035916     | 1811 | 6.5 | 6.4 | 6.6 | ↓ | -0.2 | 1.9E-04 | 4.2E-02 |
| chr5:10343412-10343935   | 524  | 3.8 | 3.3 | 4.2 | ↓ | -0.9 | 8.2E-08 | 1.0E-04 |
| chr5:103518642-103520803 | 2162 | 6.1 | 5.9 | 6.2 | ↓ | -0.3 | 1.0E-04 | 2.5E-02 |
| chr5:103521547-103524491 | 2945 | 7.3 | 7.1 | 7.4 | ↓ | -0.3 | 2.7E-06 | 1.7E-03 |
| chr5:103524493-103525206 | 714  | 4.1 | 3.7 | 4.4 | ↓ | -0.7 | 5.9E-05 | 1.8E-02 |
| chr5:103526589-103528717 | 2129 | 6.2 | 6.0 | 6.4 | ↓ | -0.3 | 1.1E-06 | 8.2E-04 |
| chr5:103726898-103727672 | 775  | 3.8 | 3.4 | 4.1 | ↓ | -0.8 | 8.2E-05 | 2.1E-02 |
| chr5:10377641-10377947   | 307  | 2.0 | 2.5 | 1.2 | ↑ | 1.2  | 9.1E-05 | 2.3E-02 |
| chr5:103786406-103786879 | 474  | 3.0 | 2.5 | 3.4 | ↓ | -0.9 | 2.2E-04 | 4.5E-02 |
| chr5:103797452-103797792 | 341  | 2.2 | 1.5 | 2.6 | ↓ | -1.1 | 3.0E-04 | 5.5E-02 |
| chr5:103813384-103813820 | 437  | 4.8 | 4.6 | 5.0 | ↓ | -0.4 | 5.9E-04 | 8.3E-02 |
| chr5:103902076-103902936 | 861  | 4.1 | 3.5 | 4.5 | ↓ | -1.0 | 5.6E-08 | 7.8E-05 |
| chr5:103904274-103904583 | 310  | 3.4 | 3.0 | 3.7 | ↓ | -0.7 | 5.1E-04 | 7.7E-02 |
| chr5:103945452-103945789 | 338  | 3.8 | 3.4 | 4.1 | ↓ | -0.7 | 6.7E-05 | 1.9E-02 |
| chr5:10409900-10410629   | 730  | 4.5 | 4.7 | 4.2 | ↑ | 0.5  | 7.0E-04 | 9.5E-02 |
| chr5:104127896-104128411 | 516  | 4.2 | 3.9 | 4.4 | ↓ | -0.5 | 2.1E-04 | 4.3E-02 |
| chr5:105203082-105203453 | 372  | 2.9 | 2.1 | 3.4 | ↓ | -1.3 | 1.3E-07 | 1.4E-04 |
| chr5:105476904-105477519 | 616  | 3.3 | 3.6 | 2.9 | ↑ | 0.7  | 2.1E-04 | 4.5E-02 |
| chr5:105525564-105525822 | 259  | 3.4 | 3.7 | 2.9 | ↑ | 0.8  | 3.2E-05 | 1.1E-02 |
| chr5:105966228-105966671 | 444  | 4.2 | 3.8 | 4.5 | ↓ | -0.7 | 4.1E-05 | 1.4E-02 |
| chr5:107731571-107731819 | 249  | 2.1 | 2.6 | 1.4 | ↑ | 1.2  | 2.9E-04 | 5.4E-02 |
| chr5:108167815-108168390 | 576  | 4.9 | 4.2 | 5.4 | ↓ | -1.2 | 1.3E-12 | 7.6E-09 |
| chr5:108310916-108311301 | 386  | 2.3 | 1.6 | 2.8 | ↓ | -1.2 | 4.3E-05 | 1.4E-02 |
| chr5:108355875-108356197 | 323  | 2.1 | 2.6 | 1.4 | ↑ | 1.2  | 2.0E-04 | 4.2E-02 |
| chr5:108450255-108450556 | 302  | 2.2 | 1.7 | 2.7 | ↓ | -1.0 | 4.9E-04 | 7.5E-02 |
| chr5:108606294-108606489 | 196  | 1.7 | 1.0 | 2.2 | ↓ | -1.3 | 5.3E-04 | 7.8E-02 |
| chr5:110795670-110798411 | 2742 | 7.9 | 7.8 | 8.0 | ↓ | -0.2 | 4.4E-04 | 7.2E-02 |
| chr5:111170901-111172820 | 1920 | 6.5 | 6.3 | 6.6 | ↓ | -0.3 | 2.9E-04 | 5.4E-02 |
| chr5:111255129-111257282 | 2154 | 7.2 | 7.1 | 7.4 | ↓ | -0.3 | 1.2E-06 | 8.5E-04 |
| chr5:111357946-111358482 | 537  | 2.5 | 1.9 | 2.9 | ↓ | -1.1 | 9.1E-05 | 2.3E-02 |

|                          |      |     |     |     |   |      |         |         |
|--------------------------|------|-----|-----|-----|---|------|---------|---------|
| chr5:111399134-111401587 | 2454 | 6.6 | 6.5 | 6.7 | ↓ | -0.2 | 3.1E-04 | 5.7E-02 |
| chr5:111470356-111474184 | 3829 | 7.4 | 7.3 | 7.5 | ↓ | -0.2 | 1.3E-05 | 6.0E-03 |
| chr5:11614635-11615041   | 407  | 2.7 | 3.1 | 2.1 | ↑ | 1.0  | 3.2E-05 | 1.1E-02 |
| chr5:12285971-12287776   | 1806 | 5.6 | 5.4 | 5.8 | ↓ | -0.4 | 1.7E-04 | 3.8E-02 |
| chr5:12397066-12397271   | 206  | 2.1 | 1.3 | 2.6 | ↓ | -1.3 | 7.6E-05 | 2.0E-02 |
| chr5:12773550-12774048   | 499  | 3.8 | 3.4 | 4.1 | ↓ | -0.7 | 9.9E-05 | 2.4E-02 |
| chr5:12796575-12796976   | 402  | 3.2 | 2.8 | 3.6 | ↓ | -0.8 | 1.4E-04 | 3.2E-02 |
| chr5:12822052-12822559   | 508  | 2.9 | 2.3 | 3.4 | ↓ | -1.1 | 4.2E-05 | 1.4E-02 |
| chr5:13596100-13596499   | 400  | 2.7 | 2.1 | 3.2 | ↓ | -1.1 | 1.4E-05 | 6.2E-03 |
| chr5:14223110-14223544   | 435  | 4.0 | 4.3 | 3.6 | ↑ | 0.7  | 2.8E-05 | 1.1E-02 |
| chr5:14374565-14374909   | 345  | 2.9 | 2.3 | 3.4 | ↓ | -1.1 | 1.3E-05 | 5.8E-03 |
| chr5:14395082-14396156   | 1075 | 3.8 | 3.3 | 4.2 | ↓ | -0.9 | 4.8E-06 | 2.7E-03 |
| chr5:14829485-14829812   | 328  | 3.3 | 2.8 | 3.6 | ↓ | -0.8 | 8.6E-05 | 2.2E-02 |
| chr5:16381603-16382259   | 657  | 4.0 | 4.3 | 3.6 | ↑ | 0.7  | 3.8E-06 | 2.2E-03 |
| chr5:17497673-17498698   | 1026 | 4.3 | 3.9 | 4.6 | ↓ | -0.7 | 1.4E-06 | 9.3E-04 |
| chr5:17775560-17777804   | 2245 | 6.7 | 6.9 | 6.4 | ↑ | 0.5  | 1.8E-05 | 7.5E-03 |
| chr5:1785071-1789456     | 4386 | 7.9 | 7.8 | 8.0 | ↓ | -0.3 | 1.6E-05 | 6.8E-03 |
| chr5:17934432-17936617   | 2186 | 7.3 | 7.1 | 7.4 | ↓ | -0.3 | 1.8E-04 | 3.9E-02 |
| chr5:19657367-19657605   | 239  | 2.2 | 1.3 | 2.8 | ↓ | -1.5 | 1.4E-06 | 9.4E-04 |
| chr5:19681388-19681662   | 275  | 2.2 | 1.6 | 2.7 | ↓ | -1.1 | 4.6E-04 | 7.4E-02 |
| chr5:19693692-19693971   | 280  | 1.6 | 0.4 | 2.2 | ↓ | -1.8 | 2.7E-06 | 1.7E-03 |
| chr5:20194562-20195548   | 987  | 4.1 | 3.7 | 4.5 | ↓ | -0.7 | 7.0E-05 | 1.9E-02 |
| chr5:2025541-2026512     | 972  | 5.3 | 5.0 | 5.5 | ↓ | -0.5 | 2.3E-06 | 1.4E-03 |
| chr5:2043763-2047005     | 3243 | 6.8 | 6.7 | 7.0 | ↓ | -0.2 | 6.0E-05 | 1.8E-02 |
| chr5:20459216-20459640   | 425  | 2.3 | 2.8 | 1.7 | ↑ | 1.1  | 4.0E-04 | 6.7E-02 |
| chr5:20732872-20733303   | 432  | 4.5 | 4.3 | 4.7 | ↓ | -0.5 | 4.4E-04 | 7.2E-02 |
| chr5:2240221-2240703     | 483  | 3.2 | 2.7 | 3.6 | ↓ | -0.9 | 6.2E-04 | 8.7E-02 |
| chr5:22922172-22923213   | 1042 | 3.6 | 3.0 | 3.9 | ↓ | -0.9 | 3.1E-04 | 5.7E-02 |
| chr5:24152571-24152956   | 386  | 2.9 | 2.1 | 3.5 | ↓ | -1.4 | 1.0E-07 | 1.2E-04 |
| chr5:24726142-24726811   | 670  | 4.3 | 4.6 | 3.9 | ↑ | 0.6  | 6.1E-05 | 1.8E-02 |
| chr5:24732915-24734298   | 1384 | 5.1 | 4.6 | 5.4 | ↓ | -0.8 | 7.9E-10 | 2.3E-06 |
| chr5:2534308-2534707     | 400  | 4.4 | 4.1 | 4.6 | ↓ | -0.5 | 1.4E-04 | 3.2E-02 |
| chr5:25958598-25959162   | 565  | 4.3 | 4.7 | 3.9 | ↑ | 0.8  | 7.6E-06 | 3.9E-03 |
| chr5:25959277-25960270   | 994  | 4.6 | 5.0 | 4.0 | ↑ | 0.9  | 2.0E-07 | 2.0E-04 |
| chr5:25962662-25963986   | 1325 | 5.3 | 5.5 | 5.0 | ↑ | 0.5  | 6.8E-05 | 1.9E-02 |
| chr5:25965924-25966217   | 294  | 2.5 | 3.0 | 1.7 | ↑ | 1.3  | 5.2E-06 | 2.9E-03 |
| chr5:2617465-2618112     | 648  | 3.8 | 3.5 | 4.1 | ↓ | -0.6 | 4.4E-04 | 7.2E-02 |
| chr5:2623120-2626907     | 3788 | 8.0 | 7.9 | 8.1 | ↓ | -0.1 | 7.4E-04 | 1.0E-01 |
| chr5:26760984-26761255   | 272  | 2.3 | 2.7 | 1.6 | ↑ | 1.1  | 3.1E-04 | 5.7E-02 |
| chr5:26897730-26898290   | 561  | 3.5 | 3.1 | 3.8 | ↓ | -0.7 | 8.2E-05 | 2.1E-02 |
| chr5:26929122-26930130   | 1009 | 3.9 | 4.1 | 3.5 | ↑ | 0.6  | 5.4E-05 | 1.7E-02 |
| chr5:2794511-2796515     | 2005 | 5.7 | 5.5 | 5.9 | ↓ | -0.4 | 1.5E-05 | 6.5E-03 |
| chr5:2801467-2803233     | 1767 | 6.0 | 5.9 | 6.2 | ↓ | -0.3 | 2.0E-04 | 4.2E-02 |
| chr5:3066818-3067369     | 552  | 4.3 | 3.9 | 4.5 | ↓ | -0.6 | 7.4E-05 | 2.0E-02 |
| chr5:31268039-31268562   | 524  | 3.3 | 2.7 | 3.7 | ↓ | -1.0 | 2.8E-06 | 1.7E-03 |
| chr5:31818863-31819058   | 196  | 1.9 | 1.2 | 2.4 | ↓ | -1.1 | 5.1E-04 | 7.7E-02 |
| chr5:33136471-33137645   | 1175 | 5.2 | 4.9 | 5.5 | ↓ | -0.7 | 1.0E-08 | 2.2E-05 |

|                        |      |     |     |     |   |      |         |         |
|------------------------|------|-----|-----|-----|---|------|---------|---------|
| chr5:33175988-33176279 | 292  | 3.6 | 3.1 | 3.9 | ↓ | -0.7 | 6.5E-05 | 1.9E-02 |
| chr5:33250969-33251913 | 945  | 4.5 | 4.2 | 4.7 | ↓ | -0.5 | 5.0E-04 | 7.6E-02 |
| chr5:34102883-34103421 | 539  | 3.4 | 3.7 | 2.9 | ↑ | 0.7  | 2.0E-04 | 4.2E-02 |
| chr5:34327306-34328446 | 1141 | 4.9 | 4.6 | 5.1 | ↓ | -0.4 | 2.1E-04 | 4.5E-02 |
| chr5:3470414-3471694   | 1281 | 5.1 | 4.6 | 5.4 | ↓ | -0.8 | 4.2E-08 | 6.8E-05 |
| chr5:34833413-34834040 | 628  | 4.3 | 4.5 | 4.0 | ↑ | 0.5  | 4.8E-04 | 7.5E-02 |
| chr5:35080180-35080650 | 471  | 3.8 | 3.4 | 4.2 | ↓ | -0.7 | 1.1E-05 | 5.2E-03 |
| chr5:3700954-3701529   | 576  | 3.9 | 3.5 | 4.2 | ↓ | -0.7 | 2.2E-05 | 8.8E-03 |
| chr5:37142527-37142931 | 405  | 4.7 | 4.4 | 4.9 | ↓ | -0.4 | 4.5E-04 | 7.4E-02 |
| chr5:37261027-37261424 | 398  | 3.1 | 3.4 | 2.6 | ↑ | 0.8  | 4.3E-04 | 7.1E-02 |
| chr5:37261955-37262781 | 827  | 4.5 | 4.7 | 4.2 | ↑ | 0.5  | 1.1E-04 | 2.7E-02 |
| chr5:39064054-39064244 | 191  | 1.5 | 0.5 | 2.1 | ↓ | -1.6 | 4.2E-05 | 1.4E-02 |
| chr5:39069088-39069686 | 599  | 2.8 | 2.1 | 3.3 | ↓ | -1.2 | 5.5E-05 | 1.7E-02 |
| chr5:4139989-4142150   | 2162 | 6.0 | 5.7 | 6.2 | ↓ | -0.5 | 2.9E-07 | 2.6E-04 |
| chr5:4160497-4160889   | 393  | 3.7 | 3.2 | 4.1 | ↓ | -0.9 | 5.1E-07 | 4.2E-04 |
| chr5:4175082-4175478   | 397  | 4.2 | 4.0 | 4.5 | ↓ | -0.5 | 4.8E-04 | 7.5E-02 |
| chr5:4360187-4360411   | 225  | 1.8 | 1.1 | 2.3 | ↓ | -1.2 | 5.2E-04 | 7.7E-02 |
| chr5:46235363-46235561 | 199  | 1.4 | 1.9 | 0.5 | ↑ | 1.4  | 4.6E-04 | 7.4E-02 |
| chr5:47868241-47868496 | 256  | 2.0 | 1.3 | 2.4 | ↓ | -1.1 | 5.8E-04 | 8.3E-02 |
| chr5:48170956-48171295 | 340  | 2.6 | 1.9 | 3.0 | ↓ | -1.1 | 2.2E-05 | 8.7E-03 |
| chr5:49155259-49156321 | 1063 | 4.3 | 4.5 | 4.0 | ↑ | 0.6  | 2.2E-04 | 4.5E-02 |
| chr5:49512591-49512991 | 401  | 3.0 | 3.4 | 2.6 | ↑ | 0.8  | 3.7E-04 | 6.4E-02 |
| chr5:49837684-49838213 | 530  | 3.2 | 3.6 | 2.6 | ↑ | 0.9  | 3.1E-05 | 1.1E-02 |
| chr5:49911412-49912006 | 595  | 2.6 | 3.1 | 2.0 | ↑ | 1.1  | 1.6E-04 | 3.6E-02 |
| chr5:52889395-52889822 | 428  | 3.3 | 2.8 | 3.6 | ↓ | -0.8 | 3.3E-04 | 5.9E-02 |
| chr5:53429330-53429967 | 638  | 3.3 | 2.8 | 3.6 | ↓ | -0.8 | 5.0E-05 | 1.7E-02 |
| chr5:53755492-53756241 | 750  | 4.2 | 3.5 | 4.7 | ↓ | -1.3 | 1.2E-14 | 1.0E-10 |
| chr5:5379787-5380616   | 830  | 3.8 | 4.1 | 3.5 | ↑ | 0.6  | 5.6E-04 | 8.1E-02 |
| chr5:5429096-5429783   | 688  | 4.9 | 5.2 | 4.7 | ↑ | 0.5  | 5.5E-05 | 1.7E-02 |
| chr5:54685013-54685687 | 675  | 4.0 | 4.3 | 3.6 | ↑ | 0.7  | 6.4E-05 | 1.9E-02 |
| chr5:55370278-55371591 | 1314 | 5.5 | 5.2 | 5.7 | ↓ | -0.5 | 6.8E-04 | 9.3E-02 |
| chr5:5572269-5573278   | 1010 | 5.9 | 5.7 | 6.1 | ↓ | -0.4 | 5.8E-05 | 1.7E-02 |
| chr5:5646535-5648423   | 1889 | 6.0 | 5.8 | 6.3 | ↓ | -0.5 | 7.3E-08 | 9.7E-05 |
| chr5:5651857-5652854   | 998  | 4.5 | 4.2 | 4.7 | ↓ | -0.5 | 1.1E-04 | 2.7E-02 |
| chr5:56627378-56628464 | 1087 | 4.7 | 4.4 | 5.0 | ↓ | -0.6 | 1.1E-04 | 2.6E-02 |
| chr5:56633421-56633736 | 316  | 2.9 | 2.4 | 3.3 | ↓ | -0.9 | 4.9E-04 | 7.5E-02 |
| chr5:56635662-56636013 | 352  | 2.8 | 2.3 | 3.1 | ↓ | -0.8 | 5.2E-04 | 7.7E-02 |
| chr5:56672413-56672800 | 388  | 1.9 | 1.1 | 2.3 | ↓ | -1.2 | 4.3E-04 | 7.1E-02 |
| chr5:56833497-56834027 | 531  | 4.2 | 3.8 | 4.5 | ↓ | -0.8 | 6.5E-06 | 3.5E-03 |
| chr5:56931454-56931892 | 439  | 2.9 | 2.5 | 3.3 | ↓ | -0.8 | 3.5E-04 | 6.2E-02 |
| chr5:57295725-57295983 | 259  | 1.9 | 2.3 | 1.2 | ↑ | 1.1  | 5.8E-04 | 8.3E-02 |
| chr5:57849667-57849976 | 310  | 2.2 | 1.6 | 2.7 | ↓ | -1.0 | 4.9E-04 | 7.5E-02 |
| chr5:58568347-58568558 | 212  | 1.5 | 0.4 | 2.1 | ↓ | -1.7 | 3.2E-05 | 1.1E-02 |
| chr5:5928700-5930581   | 1882 | 5.5 | 5.3 | 5.8 | ↓ | -0.4 | 7.5E-05 | 2.0E-02 |
| chr5:5936663-5937750   | 1088 | 5.5 | 5.2 | 5.7 | ↓ | -0.5 | 2.4E-05 | 9.4E-03 |
| chr5:5957095-5957576   | 482  | 2.8 | 2.1 | 3.3 | ↓ | -1.3 | 6.8E-06 | 3.5E-03 |
| chr5:6265672-6266528   | 857  | 4.7 | 4.4 | 5.0 | ↓ | -0.6 | 1.3E-05 | 6.0E-03 |

|                        |      |     |     |     |   |      |         |         |
|------------------------|------|-----|-----|-----|---|------|---------|---------|
| chr5:63017271-63017523 | 253  | 1.9 | 2.3 | 1.2 | ↑ | 1.2  | 4.8E-04 | 7.5E-02 |
| chr5:63128654-63129082 | 429  | 3.4 | 2.9 | 3.7 | ↓ | -0.8 | 4.2E-04 | 7.1E-02 |
| chr5:63855870-63856189 | 320  | 2.7 | 3.1 | 2.2 | ↑ | 0.9  | 3.0E-04 | 5.5E-02 |
| chr5:646962-647832     | 871  | 5.7 | 5.4 | 5.9 | ↓ | -0.4 | 6.9E-05 | 1.9E-02 |
| chr5:65477244-65478803 | 1560 | 5.4 | 5.6 | 5.3 | ↑ | 0.3  | 4.1E-04 | 6.8E-02 |
| chr5:65497494-65497778 | 285  | 2.2 | 2.6 | 1.6 | ↑ | 1.0  | 4.7E-04 | 7.5E-02 |
| chr5:65674575-65675162 | 588  | 2.4 | 1.7 | 2.8 | ↓ | -1.1 | 2.5E-04 | 4.9E-02 |
| chr5:66011129-66011736 | 608  | 4.9 | 4.6 | 5.1 | ↓ | -0.5 | 4.9E-05 | 1.6E-02 |
| chr5:66518310-66519897 | 1588 | 6.2 | 5.9 | 6.4 | ↓ | -0.4 | 1.0E-04 | 2.5E-02 |
| chr5:66836362-66837817 | 1456 | 5.2 | 5.0 | 5.3 | ↓ | -0.4 | 5.3E-04 | 7.7E-02 |
| chr5:67031504-67031837 | 334  | 2.3 | 2.7 | 1.7 | ↑ | 1.0  | 3.7E-04 | 6.5E-02 |
| chr5:67342363-67342791 | 429  | 2.5 | 3.0 | 1.8 | ↑ | 1.2  | 9.8E-06 | 4.8E-03 |
| chr5:67345272-67345890 | 619  | 3.2 | 2.8 | 3.5 | ↓ | -0.8 | 7.1E-04 | 9.7E-02 |
| chr5:67485177-67485419 | 243  | 2.3 | 2.7 | 1.7 | ↑ | 1.1  | 1.6E-04 | 3.6E-02 |
| chr5:67514658-67515809 | 1152 | 5.5 | 5.7 | 5.2 | ↑ | 0.4  | 7.9E-05 | 2.1E-02 |
| chr5:67525386-67525831 | 446  | 3.6 | 4.1 | 3.0 | ↑ | 1.0  | 2.5E-08 | 4.2E-05 |
| chr5:67546092-67547686 | 1595 | 5.3 | 5.5 | 5.0 | ↑ | 0.6  | 2.4E-05 | 9.4E-03 |
| chr5:67723591-67724034 | 444  | 3.3 | 2.4 | 3.8 | ↓ | -1.3 | 6.9E-09 | 1.6E-05 |
| chr5:67755881-67756210 | 330  | 3.3 | 2.9 | 3.6 | ↓ | -0.7 | 3.4E-04 | 6.0E-02 |
| chr5:67920261-67920666 | 406  | 2.2 | 2.6 | 1.5 | ↑ | 1.1  | 2.8E-04 | 5.4E-02 |
| chr5:68055782-68056339 | 558  | 3.4 | 3.7 | 2.9 | ↑ | 0.9  | 4.0E-05 | 1.4E-02 |
| chr5:6810944-6811768   | 825  | 4.5 | 4.2 | 4.8 | ↓ | -0.5 | 5.5E-04 | 7.9E-02 |
| chr5:68578309-68579189 | 881  | 4.7 | 4.3 | 5.0 | ↓ | -0.8 | 1.6E-08 | 2.9E-05 |
| chr5:68892726-68893711 | 986  | 4.9 | 4.6 | 5.1 | ↓ | -0.5 | 3.6E-04 | 6.3E-02 |
| chr5:68965577-68966817 | 1241 | 5.1 | 4.9 | 5.2 | ↓ | -0.4 | 3.8E-04 | 6.6E-02 |
| chr5:69084457-69085641 | 1185 | 4.6 | 4.2 | 4.9 | ↓ | -0.7 | 2.8E-07 | 2.6E-04 |
| chr5:69249753-69252303 | 2551 | 6.2 | 6.0 | 6.4 | ↓ | -0.5 | 7.9E-08 | 1.0E-04 |
| chr5:69292240-69294702 | 2463 | 6.6 | 6.5 | 6.7 | ↓ | -0.3 | 1.2E-05 | 5.7E-03 |
| chr5:69783157-69784096 | 940  | 4.9 | 4.6 | 5.0 | ↓ | -0.4 | 7.4E-04 | 1.0E-01 |
| chr5:69794919-69795829 | 911  | 4.5 | 4.1 | 4.8 | ↓ | -0.7 | 5.3E-07 | 4.3E-04 |
| chr5:69871255-69872182 | 928  | 4.7 | 4.4 | 5.0 | ↓ | -0.7 | 1.4E-04 | 3.2E-02 |
| chr5:69904039-69904637 | 599  | 5.4 | 4.6 | 5.9 | ↓ | -1.3 | 1.5E-17 | 2.6E-13 |
| chr5:70226625-70227442 | 818  | 4.4 | 4.1 | 4.7 | ↓ | -0.6 | 1.8E-04 | 4.1E-02 |
| chr5:7038162-7039359   | 1198 | 4.9 | 4.6 | 5.1 | ↓ | -0.5 | 2.4E-04 | 4.9E-02 |
| chr5:71341514-71343273 | 1760 | 5.2 | 5.0 | 5.5 | ↓ | -0.5 | 3.0E-06 | 1.7E-03 |
| chr5:71389946-71391675 | 1730 | 5.4 | 5.2 | 5.6 | ↓ | -0.4 | 6.1E-04 | 8.6E-02 |
| chr5:71391934-71395956 | 4023 | 7.5 | 7.3 | 7.6 | ↓ | -0.3 | 2.1E-07 | 2.1E-04 |
| chr5:71526475-71526995 | 521  | 3.3 | 2.7 | 3.6 | ↓ | -0.9 | 2.9E-05 | 1.1E-02 |
| chr5:72506950-72507719 | 770  | 3.8 | 3.5 | 4.1 | ↓ | -0.6 | 2.5E-04 | 5.0E-02 |
| chr5:74336386-74336935 | 550  | 3.1 | 3.4 | 2.6 | ↑ | 0.8  | 1.7E-04 | 3.8E-02 |
| chr5:75865127-75866003 | 877  | 5.1 | 4.6 | 5.4 | ↓ | -0.8 | 6.1E-10 | 1.9E-06 |
| chr5:76054757-76055125 | 369  | 3.0 | 2.5 | 3.4 | ↓ | -0.9 | 5.4E-05 | 1.7E-02 |
| chr5:77429086-77429755 | 670  | 4.3 | 4.0 | 4.6 | ↓ | -0.6 | 6.3E-05 | 1.8E-02 |
| chr5:78455956-78456248 | 293  | 2.5 | 2.9 | 1.9 | ↑ | 0.9  | 5.0E-04 | 7.6E-02 |
| chr5:78972820-78973169 | 350  | 2.2 | 1.5 | 2.7 | ↓ | -1.2 | 5.7E-05 | 1.7E-02 |
| chr5:7916913-7917812   | 900  | 5.0 | 5.2 | 4.8 | ↑ | 0.4  | 3.8E-04 | 6.6E-02 |
| chr5:81313327-81313555 | 229  | 2.1 | 2.5 | 1.4 | ↑ | 1.1  | 4.7E-04 | 7.5E-02 |

|                        |      |     |     |     |   |      |         |         |
|------------------------|------|-----|-----|-----|---|------|---------|---------|
| chr5:81578607-81579567 | 961  | 4.1 | 3.8 | 4.4 | ↓ | -0.6 | 2.4E-04 | 4.8E-02 |
| chr5:83239951-83241886 | 1936 | 6.2 | 6.0 | 6.3 | ↓ | -0.4 | 4.1E-07 | 3.5E-04 |
| chr5:83534558-83534883 | 326  | 2.1 | 1.5 | 2.6 | ↓ | -1.0 | 6.6E-04 | 9.1E-02 |
| chr5:84464870-84465113 | 244  | 2.0 | 2.5 | 1.2 | ↑ | 1.3  | 9.4E-05 | 2.3E-02 |
| chr5:84612590-84612881 | 292  | 3.2 | 2.5 | 3.6 | ↓ | -1.1 | 2.3E-07 | 2.2E-04 |
| chr5:8475874-8476292   | 419  | 2.8 | 1.9 | 3.3 | ↓ | -1.4 | 1.2E-08 | 2.3E-05 |
| chr5:85029291-85030098 | 808  | 5.6 | 5.4 | 5.8 | ↓ | -0.5 | 5.7E-05 | 1.7E-02 |
| chr5:85306513-85306844 | 332  | 3.0 | 2.5 | 3.4 | ↓ | -0.9 | 2.2E-04 | 4.5E-02 |
| chr5:85339895-85340320 | 426  | 3.0 | 3.3 | 2.5 | ↑ | 0.8  | 5.9E-04 | 8.3E-02 |
| chr5:85773864-85774274 | 411  | 3.3 | 2.2 | 3.8 | ↓ | -1.6 | 1.6E-12 | 7.8E-09 |
| chr5:85776722-85777248 | 527  | 4.7 | 4.4 | 5.0 | ↓ | -0.6 | 5.2E-04 | 7.7E-02 |
| chr5:85783057-85783423 | 367  | 3.0 | 2.5 | 3.4 | ↓ | -0.9 | 2.8E-04 | 5.3E-02 |
| chr5:85784789-85785526 | 738  | 3.7 | 3.1 | 4.1 | ↓ | -1.0 | 1.4E-07 | 1.5E-04 |
| chr5:8581709-8582978   | 1270 | 5.1 | 4.7 | 5.4 | ↓ | -0.7 | 7.0E-05 | 1.9E-02 |
| chr5:86254289-86254652 | 364  | 2.2 | 2.7 | 1.6 | ↑ | 1.1  | 2.5E-04 | 4.9E-02 |
| chr5:8681448-8681865   | 418  | 2.9 | 2.3 | 3.3 | ↓ | -1.0 | 1.4E-05 | 6.3E-03 |
| chr5:87230683-87231052 | 370  | 2.6 | 2.0 | 3.0 | ↓ | -1.0 | 2.2E-04 | 4.5E-02 |
| chr5:87243077-87243547 | 471  | 3.2 | 2.8 | 3.5 | ↓ | -0.7 | 2.8E-04 | 5.4E-02 |
| chr5:87426132-87426378 | 247  | 2.1 | 1.4 | 2.6 | ↓ | -1.2 | 9.7E-05 | 2.4E-02 |
| chr5:87542765-87543669 | 905  | 3.4 | 3.7 | 3.0 | ↑ | 0.7  | 5.1E-04 | 7.7E-02 |
| chr5:88642086-88642388 | 303  | 2.1 | 1.5 | 2.6 | ↓ | -1.1 | 2.0E-04 | 4.2E-02 |
| chr5:8878793-8879408   | 616  | 4.7 | 4.3 | 5.0 | ↓ | -0.7 | 9.6E-07 | 7.3E-04 |
| chr5:88997388-88997957 | 570  | 3.4 | 2.7 | 3.8 | ↓ | -1.1 | 9.1E-06 | 4.6E-03 |
| chr5:89017511-89018165 | 655  | 5.1 | 4.8 | 5.4 | ↓ | -0.6 | 3.1E-05 | 1.1E-02 |
| chr5:89085459-89085823 | 365  | 3.9 | 3.4 | 4.3 | ↓ | -0.9 | 1.1E-08 | 2.2E-05 |
| chr5:89873312-89873605 | 294  | 2.7 | 2.2 | 3.1 | ↓ | -1.0 | 8.9E-05 | 2.3E-02 |
| chr5:90500155-90501094 | 940  | 4.7 | 4.3 | 5.0 | ↓ | -0.7 | 4.4E-08 | 6.8E-05 |
| chr5:90588712-90589093 | 382  | 3.0 | 2.5 | 3.4 | ↓ | -0.8 | 2.6E-04 | 5.0E-02 |
| chr5:91533612-91534391 | 780  | 4.3 | 4.0 | 4.6 | ↓ | -0.6 | 7.0E-04 | 9.5E-02 |
| chr5:91793239-91793445 | 207  | 1.7 | 0.9 | 2.3 | ↓ | -1.4 | 5.3E-05 | 1.7E-02 |
| chr5:91839178-91840965 | 1788 | 5.0 | 4.8 | 5.3 | ↓ | -0.5 | 3.0E-04 | 5.6E-02 |
| chr5:91847110-91848343 | 1234 | 5.0 | 5.3 | 4.8 | ↑ | 0.5  | 5.3E-05 | 1.7E-02 |
| chr5:91857884-91858212 | 329  | 4.1 | 3.6 | 4.4 | ↓ | -0.8 | 1.9E-05 | 7.9E-03 |
| chr5:91874618-91875575 | 958  | 3.4 | 2.3 | 4.0 | ↓ | -1.7 | 3.5E-16 | 4.0E-12 |
| chr5:91875655-91876174 | 520  | 3.0 | 2.1 | 3.6 | ↓ | -1.5 | 2.2E-09 | 5.8E-06 |
| chr5:91879582-91880838 | 1257 | 4.5 | 4.1 | 4.9 | ↓ | -0.8 | 6.0E-10 | 1.9E-06 |
| chr5:91882335-91882584 | 250  | 1.7 | 0.9 | 2.3 | ↓ | -1.4 | 6.9E-05 | 1.9E-02 |
| chr5:91882744-91883657 | 914  | 3.5 | 3.1 | 3.8 | ↓ | -0.7 | 5.2E-04 | 7.7E-02 |
| chr5:91884210-91884570 | 361  | 2.2 | 1.1 | 2.8 | ↓ | -1.6 | 2.4E-07 | 2.3E-04 |
| chr5:91930121-91930356 | 236  | 2.1 | 1.5 | 2.5 | ↓ | -1.0 | 5.4E-04 | 7.9E-02 |
| chr5:91965750-91966340 | 591  | 3.4 | 3.0 | 3.8 | ↓ | -0.7 | 3.1E-04 | 5.7E-02 |
| chr5:91997778-91998515 | 738  | 3.7 | 3.1 | 4.1 | ↓ | -1.0 | 4.6E-08 | 6.8E-05 |
| chr5:92002920-92003386 | 467  | 2.9 | 2.4 | 3.2 | ↓ | -0.8 | 4.9E-04 | 7.5E-02 |
| chr5:92005949-92006567 | 619  | 3.6 | 2.8 | 4.1 | ↓ | -1.2 | 1.2E-07 | 1.3E-04 |
| chr5:92008026-92008660 | 635  | 4.0 | 3.6 | 4.3 | ↓ | -0.7 | 2.2E-04 | 4.5E-02 |
| chr5:92008947-92009394 | 448  | 3.2 | 2.6 | 3.6 | ↓ | -1.0 | 1.1E-06 | 7.7E-04 |
| chr5:92009607-92010952 | 1346 | 5.7 | 5.2 | 6.1 | ↓ | -0.8 | 4.9E-22 | 1.7E-17 |

|                          |      |     |     |     |   |      |         |         |
|--------------------------|------|-----|-----|-----|---|------|---------|---------|
| chr5:92011771-92013069   | 1299 | 5.7 | 5.5 | 5.8 | ↓ | -0.4 | 9.6E-05 | 2.4E-02 |
| chr5:92013130-92013329   | 200  | 1.6 | 0.4 | 2.2 | ↓ | -1.7 | 6.6E-06 | 3.5E-03 |
| chr5:92013455-92013830   | 376  | 2.8 | 2.3 | 3.2 | ↓ | -0.9 | 1.2E-04 | 2.8E-02 |
| chr5:92013968-92014283   | 316  | 1.7 | 0.7 | 2.3 | ↓ | -1.7 | 6.3E-06 | 3.4E-03 |
| chr5:92014613-92014899   | 287  | 2.0 | 0.6 | 2.6 | ↓ | -2.0 | 5.0E-09 | 1.2E-05 |
| chr5:92015409-92015668   | 260  | 1.7 | 0.5 | 2.3 | ↓ | -1.8 | 6.3E-07 | 4.9E-04 |
| chr5:92032722-92033158   | 437  | 3.6 | 3.2 | 3.9 | ↓ | -0.6 | 4.9E-04 | 7.5E-02 |
| chr5:92066439-92066999   | 561  | 2.7 | 2.1 | 3.1 | ↓ | -1.0 | 6.7E-05 | 1.9E-02 |
| chr5:92304732-92305274   | 543  | 3.7 | 3.2 | 4.1 | ↓ | -0.9 | 3.1E-07 | 2.7E-04 |
| chr5:93362950-93364078   | 1129 | 5.6 | 5.4 | 5.8 | ↓ | -0.4 | 1.5E-05 | 6.5E-03 |
| chr5:93924402-93925057   | 656  | 4.6 | 4.2 | 5.0 | ↓ | -0.7 | 1.5E-06 | 9.6E-04 |
| chr5:93925370-93925891   | 522  | 4.0 | 3.6 | 4.3 | ↓ | -0.7 | 3.0E-05 | 1.1E-02 |
| chr5:94042971-94044563   | 1593 | 5.3 | 4.9 | 5.7 | ↓ | -0.8 | 2.5E-12 | 1.1E-08 |
| chr5:94044654-94046940   | 2287 | 5.9 | 6.2 | 5.6 | ↑ | 0.6  | 4.6E-05 | 1.5E-02 |
| chr5:94304568-94309659   | 5092 | 7.1 | 7.3 | 7.0 | ↑ | 0.3  | 1.1E-05 | 5.2E-03 |
| chr5:94314227-94314576   | 350  | 3.0 | 3.3 | 2.5 | ↑ | 0.8  | 5.4E-04 | 7.8E-02 |
| chr5:94692509-94693605   | 1097 | 6.6 | 6.7 | 6.5 | ↑ | 0.2  | 6.6E-04 | 9.1E-02 |
| chr5:95030829-95031501   | 673  | 4.2 | 4.5 | 3.9 | ↑ | 0.5  | 3.9E-04 | 6.6E-02 |
| chr5:97162949-97163234   | 286  | 2.6 | 1.9 | 3.1 | ↓ | -1.1 | 8.6E-05 | 2.2E-02 |
| chr5:97164894-97165489   | 596  | 3.7 | 2.9 | 4.2 | ↓ | -1.4 | 6.6E-13 | 4.5E-09 |
| chr5:97168762-97168989   | 228  | 1.9 | 1.0 | 2.5 | ↓ | -1.5 | 9.5E-06 | 4.7E-03 |
| chr5:97223367-97223765   | 399  | 3.2 | 2.8 | 3.5 | ↓ | -0.7 | 4.0E-04 | 6.8E-02 |
| chr5:97227759-97228223   | 465  | 5.0 | 4.8 | 5.3 | ↓ | -0.5 | 1.0E-06 | 7.7E-04 |
| chr5:97839155-97839431   | 277  | 2.4 | 1.5 | 2.9 | ↓ | -1.4 | 5.2E-07 | 4.2E-04 |
| chr5:98096171-98096701   | 531  | 4.1 | 3.8 | 4.4 | ↓ | -0.5 | 6.6E-04 | 9.1E-02 |
| chr5:98098249-98099596   | 1348 | 5.8 | 5.6 | 5.9 | ↓ | -0.4 | 3.3E-04 | 5.9E-02 |
| chr5:98797113-98797657   | 545  | 4.9 | 4.6 | 5.1 | ↓ | -0.5 | 2.5E-04 | 5.0E-02 |
| chr5:9943538-9943861     | 324  | 2.8 | 3.3 | 2.1 | ↑ | 1.3  | 5.7E-08 | 7.8E-05 |
| chr5:99937810-99938353   | 544  | 5.5 | 5.2 | 5.7 | ↓ | -0.4 | 1.6E-05 | 6.7E-03 |
| chr5:99938816-99939116   | 301  | 2.8 | 3.1 | 2.3 | ↑ | 0.9  | 4.8E-04 | 7.5E-02 |
| chr6:100551334-100551616 | 283  | 3.2 | 2.6 | 3.6 | ↓ | -1.0 | 3.8E-04 | 7.1E-02 |
| chr6:100694754-100695224 | 471  | 5.1 | 5.4 | 4.8 | ↑ | 0.6  | 4.2E-09 | 1.0E-05 |
| chr6:101315096-101316555 | 1460 | 5.7 | 5.5 | 5.9 | ↓ | -0.4 | 2.4E-06 | 1.7E-03 |
| chr6:102222047-102222668 | 622  | 3.6 | 3.1 | 4.0 | ↓ | -0.8 | 6.2E-06 | 3.6E-03 |
| chr6:102719500-102719726 | 227  | 1.9 | 1.2 | 2.4 | ↓ | -1.2 | 1.8E-04 | 4.4E-02 |
| chr6:102749383-102749747 | 365  | 3.6 | 3.2 | 3.9 | ↓ | -0.7 | 2.3E-04 | 5.1E-02 |
| chr6:103551958-103552443 | 486  | 2.7 | 2.0 | 3.1 | ↓ | -1.1 | 5.4E-05 | 1.9E-02 |
| chr6:104269346-104270157 | 812  | 4.8 | 5.0 | 4.5 | ↑ | 0.5  | 6.2E-04 | 9.3E-02 |
| chr6:105653577-105653882 | 306  | 2.8 | 1.9 | 3.3 | ↓ | -1.4 | 9.0E-08 | 1.5E-04 |
| chr6:108114365-108114734 | 370  | 4.1 | 3.6 | 4.4 | ↓ | -0.8 | 2.8E-05 | 1.1E-02 |
| chr6:108191833-108192024 | 192  | 2.2 | 1.6 | 2.6 | ↓ | -1.0 | 5.5E-04 | 8.7E-02 |
| chr6:108496020-108496228 | 209  | 1.6 | 2.1 | 0.8 | ↑ | 1.3  | 4.8E-04 | 8.2E-02 |
| chr6:109113246-109113738 | 493  | 3.1 | 2.4 | 3.6 | ↓ | -1.2 | 9.2E-06 | 5.0E-03 |
| chr6:110735316-110735623 | 308  | 4.0 | 4.2 | 3.7 | ↑ | 0.6  | 6.8E-04 | 9.9E-02 |
| chr6:1108513-1109271     | 759  | 3.8 | 3.4 | 4.2 | ↓ | -0.8 | 1.9E-05 | 8.6E-03 |
| chr6:1109369-1109682     | 314  | 2.2 | 1.5 | 2.7 | ↓ | -1.1 | 2.3E-04 | 5.2E-02 |
| chr6:111003007-111003289 | 283  | 2.9 | 3.3 | 2.2 | ↑ | 1.1  | 7.6E-05 | 2.4E-02 |

|                          |      |     |     |     |   |      |         |         |
|--------------------------|------|-----|-----|-----|---|------|---------|---------|
| chr6:111444503-111444771 | 269  | 2.4 | 1.7 | 2.8 | ↓ | -1.1 | 7.5E-05 | 2.4E-02 |
| chr6:111934347-111934561 | 215  | 1.7 | 2.3 | 0.9 | ↑ | 1.3  | 1.5E-04 | 3.8E-02 |
| chr6:111978138-111978465 | 328  | 3.0 | 3.4 | 2.5 | ↑ | 0.9  | 1.7E-04 | 4.2E-02 |
| chr6:111978814-111979069 | 256  | 2.9 | 3.3 | 2.5 | ↑ | 0.8  | 6.2E-04 | 9.3E-02 |
| chr6:112566293-112566818 | 526  | 2.8 | 3.2 | 2.3 | ↑ | 0.9  | 1.9E-04 | 4.6E-02 |
| chr6:112866400-112866721 | 322  | 2.8 | 2.2 | 3.2 | ↓ | -1.0 | 4.9E-05 | 1.8E-02 |
| chr6:112927108-112927610 | 503  | 3.1 | 3.4 | 2.6 | ↑ | 0.8  | 4.1E-04 | 7.4E-02 |
| chr6:113143329-113143629 | 301  | 2.9 | 3.2 | 2.5 | ↑ | 0.8  | 5.2E-04 | 8.5E-02 |
| chr6:113166722-113167024 | 303  | 3.1 | 3.5 | 2.6 | ↑ | 1.0  | 1.1E-05 | 5.7E-03 |
| chr6:114052644-114052758 | 115  | 1.4 | 0.6 | 2.0 | ↓ | -1.3 | 6.1E-04 | 9.2E-02 |
| chr6:114191373-114191666 | 294  | 2.9 | 3.3 | 2.4 | ↑ | 0.8  | 2.0E-04 | 4.7E-02 |
| chr6:117564352-117564608 | 257  | 3.4 | 2.9 | 3.8 | ↓ | -0.9 | 6.4E-04 | 9.5E-02 |
| chr6:119439937-119440632 | 696  | 4.2 | 3.7 | 4.5 | ↓ | -0.8 | 1.4E-07 | 1.9E-04 |
| chr6:120017532-120017941 | 410  | 2.8 | 3.3 | 2.2 | ↑ | 1.0  | 5.4E-05 | 1.9E-02 |
| chr6:120341640-120341955 | 316  | 2.4 | 1.4 | 3.0 | ↓ | -1.6 | 1.0E-07 | 1.5E-04 |
| chr6:120398966-120399494 | 529  | 4.3 | 4.7 | 3.9 | ↑ | 0.7  | 9.9E-08 | 1.5E-04 |
| chr6:1204951-1208127     | 3177 | 7.8 | 7.7 | 7.9 | ↓ | -0.1 | 3.2E-04 | 6.4E-02 |
| chr6:1208133-1209361     | 1229 | 5.2 | 5.3 | 5.0 | ↑ | 0.4  | 6.7E-04 | 9.8E-02 |
| chr6:12089814-12090611   | 798  | 4.8 | 4.6 | 5.1 | ↓ | -0.5 | 1.7E-04 | 4.2E-02 |
| chr6:12199220-12199602   | 383  | 2.9 | 2.4 | 3.3 | ↓ | -1.0 | 1.8E-05 | 8.3E-03 |
| chr6:12252251-12253273   | 1023 | 5.8 | 5.4 | 6.1 | ↓ | -0.7 | 1.1E-07 | 1.5E-04 |
| chr6:12446486-12446935   | 450  | 3.7 | 3.3 | 4.0 | ↓ | -0.7 | 4.6E-04 | 7.9E-02 |
| chr6:124717243-124717508 | 266  | 2.5 | 1.8 | 2.9 | ↓ | -1.1 | 1.1E-04 | 3.1E-02 |
| chr6:125836944-125837137 | 194  | 2.0 | 2.4 | 1.4 | ↑ | 1.1  | 5.6E-04 | 8.8E-02 |
| chr6:126697917-126698711 | 795  | 3.6 | 3.2 | 3.9 | ↓ | -0.8 | 8.6E-05 | 2.7E-02 |
| chr6:135380353-135380586 | 234  | 2.3 | 1.5 | 2.8 | ↓ | -1.3 | 6.2E-05 | 2.1E-02 |
| chr6:135400057-135400306 | 250  | 2.1 | 1.4 | 2.6 | ↓ | -1.2 | 1.9E-04 | 4.5E-02 |
| chr6:135404583-135404899 | 317  | 2.9 | 1.8 | 3.5 | ↓ | -1.7 | 2.3E-11 | 1.6E-07 |
| chr6:135410825-135411086 | 262  | 2.6 | 2.0 | 2.9 | ↓ | -0.9 | 2.2E-04 | 5.0E-02 |
| chr6:135412367-135412559 | 193  | 2.0 | 1.3 | 2.5 | ↓ | -1.3 | 4.7E-05 | 1.7E-02 |
| chr6:135412887-135413285 | 399  | 2.9 | 1.9 | 3.4 | ↓ | -1.5 | 3.5E-09 | 9.1E-06 |
| chr6:135416367-135416692 | 326  | 2.6 | 2.0 | 3.0 | ↓ | -1.0 | 4.3E-05 | 1.6E-02 |
| chr6:135416730-135418053 | 1324 | 4.4 | 3.9 | 4.8 | ↓ | -0.9 | 4.7E-06 | 2.9E-03 |
| chr6:135418227-135418906 | 680  | 3.6 | 2.9 | 4.1 | ↓ | -1.2 | 6.0E-08 | 1.0E-04 |
| chr6:135433233-135433956 | 724  | 5.5 | 5.2 | 5.7 | ↓ | -0.5 | 3.8E-04 | 7.1E-02 |
| chr6:135473511-135474144 | 634  | 3.8 | 3.4 | 4.1 | ↓ | -0.7 | 9.6E-05 | 2.9E-02 |
| chr6:135547183-135547645 | 463  | 3.2 | 2.4 | 3.7 | ↓ | -1.3 | 2.0E-09 | 6.2E-06 |
| chr6:135550029-135550319 | 291  | 2.4 | 1.6 | 2.9 | ↓ | -1.3 | 4.7E-06 | 2.9E-03 |
| chr6:135559082-135559653 | 572  | 3.2 | 2.5 | 3.6 | ↓ | -1.1 | 2.5E-06 | 1.8E-03 |
| chr6:1356143-1356942     | 800  | 4.5 | 4.0 | 4.9 | ↓ | -0.9 | 2.1E-06 | 1.5E-03 |
| chr6:136306396-136307000 | 605  | 3.1 | 2.6 | 3.5 | ↓ | -0.9 | 1.1E-04 | 3.0E-02 |
| chr6:136332798-136333349 | 552  | 2.9 | 2.3 | 3.3 | ↓ | -1.1 | 1.1E-05 | 5.7E-03 |
| chr6:136892905-136893578 | 674  | 3.8 | 4.1 | 3.4 | ↑ | 0.7  | 2.6E-04 | 5.7E-02 |
| chr6:136908348-136908642 | 295  | 2.8 | 3.2 | 2.1 | ↑ | 1.1  | 3.0E-06 | 2.1E-03 |
| chr6:137057775-137058284 | 510  | 4.1 | 4.3 | 3.8 | ↑ | 0.6  | 3.5E-04 | 6.8E-02 |
| chr6:137078311-137079071 | 761  | 4.3 | 4.6 | 3.8 | ↑ | 0.8  | 8.7E-08 | 1.4E-04 |
| chr6:137080038-137080668 | 631  | 3.7 | 4.0 | 3.3 | ↑ | 0.7  | 6.6E-05 | 2.2E-02 |



|                          |      |     |     |     |   |      |         |         |
|--------------------------|------|-----|-----|-----|---|------|---------|---------|
| chr6:138245625-138245860 | 236  | 1.8 | 1.0 | 2.2 | ↓ | -1.2 | 4.8E-04 | 8.2E-02 |
| chr6:138684760-138685208 | 449  | 4.4 | 4.0 | 4.7 | ↓ | -0.7 | 1.6E-04 | 4.0E-02 |
| chr6:139028671-139029063 | 393  | 4.0 | 3.5 | 4.3 | ↓ | -0.8 | 6.9E-06 | 3.9E-03 |
| chr6:139074042-139074201 | 160  | 1.8 | 1.0 | 2.3 | ↓ | -1.3 | 1.4E-04 | 3.7E-02 |
| chr6:139114191-139114550 | 360  | 2.5 | 2.0 | 2.9 | ↓ | -1.0 | 1.3E-04 | 3.5E-02 |
| chr6:139648214-139648810 | 597  | 5.1 | 4.8 | 5.4 | ↓ | -0.5 | 4.7E-04 | 8.0E-02 |
| chr6:139746205-139746732 | 528  | 3.3 | 2.7 | 3.7 | ↓ | -0.9 | 5.5E-06 | 3.3E-03 |
| chr6:139763679-139764057 | 379  | 3.4 | 3.1 | 3.7 | ↓ | -0.7 | 3.4E-04 | 6.6E-02 |
| chr6:140537640-140538259 | 620  | 3.5 | 3.1 | 3.8 | ↓ | -0.8 | 5.6E-05 | 1.9E-02 |
| chr6:140969655-140970160 | 506  | 4.2 | 3.9 | 4.5 | ↓ | -0.6 | 3.8E-05 | 1.5E-02 |
| chr6:141416499-141417081 | 583  | 3.2 | 3.5 | 2.8 | ↑ | 0.7  | 4.5E-04 | 7.9E-02 |
| chr6:14152995-14153421   | 427  | 5.1 | 4.9 | 5.3 | ↓ | -0.4 | 4.3E-04 | 7.6E-02 |
| chr6:14186420-14186961   | 542  | 3.0 | 3.4 | 2.6 | ↑ | 0.7  | 4.5E-04 | 7.8E-02 |
| chr6:142100661-142100958 | 298  | 2.2 | 1.5 | 2.6 | ↓ | -1.1 | 4.0E-04 | 7.2E-02 |
| chr6:142956963-142957853 | 891  | 5.2 | 4.9 | 5.5 | ↓ | -0.6 | 9.7E-06 | 5.2E-03 |
| chr6:143087694-143088117 | 424  | 2.8 | 2.2 | 3.2 | ↓ | -0.9 | 1.4E-04 | 3.6E-02 |
| chr6:143378903-143379246 | 344  | 6.2 | 6.1 | 6.4 | ↓ | -0.3 | 1.3E-04 | 3.5E-02 |
| chr6:143893957-143894369 | 413  | 3.9 | 3.4 | 4.2 | ↓ | -0.9 | 8.2E-07 | 7.7E-04 |
| chr6:144073825-144074663 | 839  | 4.4 | 4.0 | 4.8 | ↓ | -0.8 | 2.9E-08 | 6.3E-05 |
| chr6:145165428-145165947 | 520  | 3.1 | 2.6 | 3.5 | ↓ | -0.9 | 1.8E-05 | 8.2E-03 |
| chr6:146292781-146293925 | 1145 | 5.6 | 5.3 | 5.9 | ↓ | -0.6 | 3.9E-07 | 4.2E-04 |
| chr6:146385503-146386183 | 681  | 4.1 | 3.8 | 4.4 | ↓ | -0.7 | 4.5E-05 | 1.7E-02 |
| chr6:146477925-146478292 | 368  | 2.3 | 2.7 | 1.7 | ↑ | 1.0  | 5.8E-04 | 9.0E-02 |
| chr6:146890284-146890767 | 484  | 3.7 | 3.3 | 4.0 | ↓ | -0.7 | 6.0E-05 | 2.0E-02 |
| chr6:146904499-146905092 | 594  | 4.5 | 4.1 | 4.8 | ↓ | -0.7 | 1.9E-07 | 2.4E-04 |
| chr6:146910451-146913532 | 3082 | 6.8 | 6.6 | 6.9 | ↓ | -0.3 | 2.6E-05 | 1.1E-02 |
| chr6:147004716-147004954 | 239  | 2.8 | 2.1 | 3.2 | ↓ | -1.1 | 3.8E-05 | 1.4E-02 |
| chr6:148177730-148177959 | 230  | 2.4 | 2.8 | 1.6 | ↑ | 1.2  | 1.7E-05 | 7.9E-03 |
| chr6:148280135-148280325 | 191  | 1.8 | 1.0 | 2.3 | ↓ | -1.4 | 2.7E-05 | 1.1E-02 |
| chr6:148280488-148281822 | 1335 | 4.9 | 4.4 | 5.2 | ↓ | -0.9 | 1.5E-07 | 1.9E-04 |
| chr6:148519102-148519667 | 566  | 4.4 | 4.1 | 4.6 | ↓ | -0.6 | 6.5E-04 | 9.7E-02 |
| chr6:148754851-148755124 | 274  | 1.7 | 2.2 | 1.0 | ↑ | 1.3  | 2.2E-04 | 5.0E-02 |
| chr6:150186524-150186945 | 422  | 2.3 | 2.7 | 1.7 | ↑ | 1.0  | 3.6E-04 | 6.8E-02 |
| chr6:150501500-150502201 | 702  | 5.0 | 4.8 | 5.2 | ↓ | -0.4 | 3.7E-04 | 7.1E-02 |
| chr6:150577916-150579684 | 1769 | 6.4 | 6.3 | 6.5 | ↓ | -0.2 | 5.0E-04 | 8.3E-02 |
| chr6:150661151-150661562 | 412  | 4.2 | 3.9 | 4.4 | ↓ | -0.5 | 6.6E-04 | 9.7E-02 |
| chr6:151133539-151134808 | 1270 | 4.8 | 4.4 | 5.1 | ↓ | -0.7 | 1.0E-06 | 8.7E-04 |
| chr6:15115653-15116230   | 578  | 4.2 | 4.5 | 3.8 | ↑ | 0.7  | 1.7E-05 | 8.0E-03 |
| chr6:15131321-15132030   | 710  | 3.9 | 3.4 | 4.3 | ↓ | -0.9 | 5.5E-07 | 5.6E-04 |
| chr6:151321565-151321989 | 425  | 4.8 | 4.4 | 5.1 | ↓ | -0.6 | 2.7E-05 | 1.1E-02 |
| chr6:15132727-15133286   | 560  | 3.9 | 4.1 | 3.5 | ↑ | 0.6  | 4.6E-04 | 8.0E-02 |
| chr6:151351711-151353606 | 1896 | 6.0 | 5.8 | 6.2 | ↓ | -0.4 | 3.8E-04 | 7.1E-02 |
| chr6:151437303-151438735 | 1433 | 5.4 | 5.7 | 5.0 | ↑ | 0.7  | 3.6E-06 | 2.3E-03 |
| chr6:15147074-15149712   | 2639 | 7.1 | 7.2 | 7.0 | ↑ | 0.2  | 5.9E-04 | 9.1E-02 |
| chr6:151589065-151589392 | 328  | 2.8 | 2.3 | 3.2 | ↓ | -0.8 | 3.9E-04 | 7.2E-02 |
| chr6:151653315-151654186 | 872  | 4.8 | 5.1 | 4.4 | ↑ | 0.7  | 8.7E-05 | 2.7E-02 |
| chr6:151654554-151654886 | 333  | 2.3 | 2.8 | 1.6 | ↑ | 1.2  | 2.9E-05 | 1.2E-02 |

|                          |      |      |      |      |   |      |         |         |
|--------------------------|------|------|------|------|---|------|---------|---------|
| chr6:151655423-151656099 | 677  | 5.0  | 5.2  | 4.7  | ↑ | 0.4  | 3.9E-04 | 7.2E-02 |
| chr6:151657699-151658053 | 355  | 4.1  | 4.5  | 3.5  | ↑ | 1.0  | 1.2E-05 | 5.8E-03 |
| chr6:151658151-151659100 | 950  | 4.1  | 4.5  | 3.5  | ↑ | 1.0  | 1.1E-05 | 5.7E-03 |
| chr6:151660385-151664641 | 4257 | 7.4  | 7.6  | 7.2  | ↑ | 0.4  | 3.4E-04 | 6.7E-02 |
| chr6:151667993-151669913 | 1921 | 6.8  | 7.1  | 6.5  | ↑ | 0.6  | 1.0E-07 | 1.5E-04 |
| chr6:152660235-152660480 | 246  | 2.7  | 3.1  | 2.2  | ↑ | 0.9  | 5.0E-04 | 8.3E-02 |
| chr6:15302132-15302454   | 323  | 2.6  | 3.0  | 2.0  | ↑ | 1.0  | 4.0E-04 | 7.3E-02 |
| chr6:154263582-154265991 | 2410 | 7.2  | 7.0  | 7.4  | ↓ | -0.4 | 5.6E-09 | 1.3E-05 |
| chr6:154338460-154340372 | 1913 | 7.4  | 7.2  | 7.5  | ↓ | -0.3 | 3.2E-06 | 2.1E-03 |
| chr6:154352107-154356434 | 4328 | 8.1  | 8.0  | 8.2  | ↓ | -0.2 | 8.2E-06 | 4.6E-03 |
| chr6:154357838-154359046 | 1209 | 6.1  | 5.9  | 6.3  | ↓ | -0.3 | 9.5E-05 | 2.9E-02 |
| chr6:154857144-154857836 | 693  | 4.5  | 4.1  | 4.8  | ↓ | -0.7 | 2.8E-07 | 3.2E-04 |
| chr6:154870650-154870871 | 222  | 2.7  | 2.2  | 3.1  | ↓ | -0.9 | 3.9E-04 | 7.2E-02 |
| chr6:154954902-154956297 | 1396 | 6.9  | 6.8  | 7.0  | ↓ | -0.3 | 5.0E-07 | 5.3E-04 |
| chr6:155085996-155087645 | 1650 | 7.6  | 7.5  | 7.8  | ↓ | -0.3 | 6.7E-05 | 2.2E-02 |
| chr6:155479786-155480910 | 1125 | 5.5  | 5.3  | 5.8  | ↓ | -0.5 | 1.2E-04 | 3.4E-02 |
| chr6:156128387-156128905 | 519  | 4.5  | 4.2  | 4.7  | ↓ | -0.5 | 5.2E-04 | 8.5E-02 |
| chr6:156176559-156177044 | 486  | 3.9  | 3.2  | 4.3  | ↓ | -1.1 | 5.6E-10 | 2.4E-06 |
| chr6:156197277-156197579 | 303  | 2.1  | 1.4  | 2.6  | ↓ | -1.2 | 1.0E-04 | 3.0E-02 |
| chr6:156225004-156225511 | 508  | 3.2  | 3.6  | 2.8  | ↑ | 0.8  | 7.1E-05 | 2.3E-02 |
| chr6:156572035-156572315 | 281  | 2.4  | 1.3  | 3.1  | ↓ | -1.8 | 2.9E-10 | 1.4E-06 |
| chr6:156667338-156669423 | 2086 | 7.2  | 7.0  | 7.3  | ↓ | -0.3 | 1.4E-09 | 4.6E-06 |
| chr6:156734389-156735769 | 1381 | 6.1  | 5.9  | 6.2  | ↓ | -0.3 | 1.7E-05 | 7.9E-03 |
| chr6:156881279-156883105 | 1827 | 7.1  | 6.9  | 7.2  | ↓ | -0.4 | 4.1E-10 | 1.9E-06 |
| chr6:156887452-156890604 | 3153 | 6.7  | 6.6  | 6.8  | ↓ | -0.2 | 5.8E-04 | 9.0E-02 |
| chr6:157131721-157131982 | 262  | 2.9  | 2.2  | 3.4  | ↓ | -1.1 | 9.7E-07 | 8.4E-04 |
| chr6:157210253-157210866 | 614  | 5.3  | 5.0  | 5.5  | ↓ | -0.6 | 3.0E-04 | 6.0E-02 |
| chr6:157211181-157211533 | 353  | 3.0  | 2.3  | 3.5  | ↓ | -1.1 | 4.4E-07 | 4.7E-04 |
| chr6:157296516-157296858 | 343  | 2.5  | 1.8  | 3.0  | ↓ | -1.2 | 1.6E-05 | 7.5E-03 |
| chr6:157370882-157371131 | 250  | 2.9  | 2.3  | 3.3  | ↓ | -1.0 | 2.3E-05 | 9.8E-03 |
| chr6:15903632-15903813   | 182  | 1.5  | 0.6  | 2.0  | ↓ | -1.4 | 2.3E-04 | 5.1E-02 |
| chr6:16250374-16250829   | 456  | 3.7  | 3.3  | 4.0  | ↓ | -0.8 | 2.0E-05 | 8.8E-03 |
| chr6:1640575-1641288     | 714  | 5.1  | 4.7  | 5.5  | ↓ | -0.8 | 6.6E-09 | 1.5E-05 |
| chr6:16929383-16929650   | 268  | 4.1  | 3.4  | 4.5  | ↓ | -1.2 | 8.2E-14 | 1.3E-09 |
| chr6:169610-172119       | 2510 | 11.2 | 11.1 | 11.2 | ↓ | -0.1 | 1.8E-04 | 4.4E-02 |
| chr6:17581095-17582361   | 1267 | 6.1  | 5.9  | 6.3  | ↓ | -0.3 | 7.8E-05 | 2.5E-02 |
| chr6:1770483-1779798     | 9316 | 9.5  | 9.5  | 9.6  | ↓ | -0.1 | 2.9E-04 | 6.0E-02 |
| chr6:17818729-17819987   | 1259 | 5.5  | 5.7  | 5.3  | ↑ | 0.4  | 9.3E-05 | 2.8E-02 |
| chr6:17945073-17946651   | 1579 | 5.0  | 5.2  | 4.8  | ↑ | 0.4  | 5.0E-04 | 8.3E-02 |
| chr6:1869154-1870450     | 1297 | 5.5  | 5.3  | 5.6  | ↓ | -0.3 | 5.6E-04 | 8.8E-02 |
| chr6:18990042-18990328   | 287  | 2.1  | 1.4  | 2.6  | ↓ | -1.2 | 7.0E-05 | 2.3E-02 |
| chr6:1916085-1917188     | 1104 | 4.6  | 4.2  | 4.9  | ↓ | -0.7 | 1.4E-04 | 3.6E-02 |
| chr6:2160161-2160650     | 490  | 4.1  | 4.4  | 3.7  | ↑ | 0.6  | 1.1E-04 | 3.1E-02 |
| chr6:22817650-22817845   | 196  | 1.8  | 1.1  | 2.3  | ↓ | -1.3 | 1.9E-04 | 4.5E-02 |
| chr6:22888874-22889044   | 171  | 2.0  | 2.5  | 1.2  | ↑ | 1.3  | 5.1E-05 | 1.8E-02 |
| chr6:2368755-2368990     | 236  | 2.2  | 1.6  | 2.6  | ↓ | -1.0 | 5.4E-04 | 8.6E-02 |
| chr6:23975190-23975542   | 353  | 4.5  | 4.1  | 4.9  | ↓ | -0.8 | 2.8E-09 | 7.9E-06 |

|                        |      |     |     |     |   |      |         |         |
|------------------------|------|-----|-----|-----|---|------|---------|---------|
| chr6:24004967-24005266 | 300  | 3.9 | 3.4 | 4.3 | ↓ | -0.9 | 4.8E-06 | 3.0E-03 |
| chr6:24032315-24032956 | 642  | 3.6 | 3.2 | 3.9 | ↓ | -0.7 | 2.0E-04 | 4.7E-02 |
| chr6:24539524-24540152 | 629  | 3.8 | 4.1 | 3.5 | ↑ | 0.6  | 5.7E-04 | 8.9E-02 |
| chr6:2505385-2507665   | 2281 | 7.3 | 7.4 | 7.1 | ↑ | 0.2  | 5.3E-05 | 1.9E-02 |
| chr6:25130862-25131849 | 988  | 5.4 | 5.0 | 5.7 | ↓ | -0.7 | 2.1E-07 | 2.6E-04 |
| chr6:25360057-25360845 | 789  | 4.4 | 4.0 | 4.8 | ↓ | -0.7 | 1.8E-06 | 1.4E-03 |
| chr6:25361219-25362091 | 873  | 4.0 | 3.7 | 4.3 | ↓ | -0.6 | 3.8E-04 | 7.1E-02 |
| chr6:25362864-25365092 | 2229 | 6.7 | 6.2 | 7.0 | ↓ | -0.9 | 8.1E-12 | 6.3E-08 |
| chr6:25365216-25365886 | 671  | 4.3 | 3.9 | 4.6 | ↓ | -0.7 | 3.3E-06 | 2.2E-03 |
| chr6:25368610-25369213 | 604  | 3.8 | 3.4 | 4.2 | ↓ | -0.8 | 9.1E-06 | 5.0E-03 |
| chr6:25493438-25495038 | 1601 | 5.6 | 5.4 | 5.8 | ↓ | -0.4 | 1.8E-04 | 4.4E-02 |
| chr6:2748523-2750332   | 1810 | 6.6 | 6.8 | 6.4 | ↑ | 0.3  | 2.4E-04 | 5.3E-02 |
| chr6:27545380-27546078 | 699  | 4.7 | 4.4 | 5.0 | ↓ | -0.6 | 7.7E-06 | 4.4E-03 |
| chr6:27789250-27789519 | 270  | 2.7 | 2.1 | 3.1 | ↓ | -1.0 | 1.5E-04 | 3.9E-02 |
| chr6:2794516-2799013   | 4498 | 8.1 | 8.0 | 8.2 | ↓ | -0.2 | 3.3E-04 | 6.4E-02 |
| chr6:28103512-28104102 | 591  | 3.4 | 3.0 | 3.7 | ↓ | -0.7 | 2.7E-04 | 5.8E-02 |
| chr6:28105518-28105928 | 411  | 4.1 | 3.6 | 4.4 | ↓ | -0.8 | 2.1E-05 | 9.2E-03 |
| chr6:28204834-28205490 | 657  | 4.2 | 3.7 | 4.5 | ↓ | -0.8 | 4.0E-09 | 1.0E-05 |
| chr6:28249089-28249525 | 437  | 4.0 | 3.6 | 4.3 | ↓ | -0.7 | 5.9E-05 | 2.0E-02 |
| chr6:28256200-28256649 | 450  | 3.2 | 2.7 | 3.6 | ↓ | -1.0 | 1.9E-05 | 8.6E-03 |
| chr6:28400215-28400567 | 353  | 2.2 | 1.5 | 2.6 | ↓ | -1.1 | 2.4E-04 | 5.2E-02 |
| chr6:2905663-2908396   | 2734 | 7.4 | 7.2 | 7.5 | ↓ | -0.3 | 9.8E-07 | 8.4E-04 |
| chr6:2914473-2915506   | 1034 | 6.3 | 6.1 | 6.5 | ↓ | -0.4 | 1.0E-07 | 1.5E-04 |
| chr6:29327706-29327867 | 162  | 1.9 | 2.3 | 1.2 | ↑ | 1.1  | 5.3E-04 | 8.6E-02 |
| chr6:29712669-29713077 | 409  | 2.9 | 2.4 | 3.3 | ↓ | -0.9 | 2.3E-04 | 5.1E-02 |
| chr6:3000570-3001792   | 1223 | 6.6 | 5.9 | 7.1 | ↓ | -1.2 | 5.1E-17 | 1.1E-12 |
| chr6:3003642-3003956   | 315  | 2.9 | 2.4 | 3.3 | ↓ | -0.9 | 1.0E-04 | 2.9E-02 |
| chr6:30053708-30054200 | 493  | 4.3 | 3.7 | 4.7 | ↓ | -0.9 | 1.1E-05 | 5.7E-03 |
| chr6:30132296-30133428 | 1133 | 5.6 | 5.4 | 5.8 | ↓ | -0.4 | 4.4E-05 | 1.7E-02 |
| chr6:30258054-30258588 | 535  | 5.0 | 4.7 | 5.3 | ↓ | -0.5 | 1.3E-04 | 3.5E-02 |
| chr6:30360187-30360613 | 427  | 2.9 | 2.1 | 3.4 | ↓ | -1.2 | 8.9E-07 | 8.2E-04 |
| chr6:30495184-30495816 | 633  | 3.6 | 2.8 | 4.1 | ↓ | -1.4 | 1.3E-10 | 7.0E-07 |
| chr6:30497477-30497968 | 492  | 3.7 | 3.1 | 4.2 | ↓ | -1.0 | 4.0E-08 | 8.1E-05 |
| chr6:30903002-30903310 | 309  | 2.6 | 3.0 | 2.1 | ↑ | 1.0  | 3.0E-04 | 6.1E-02 |
| chr6:30911646-30914031 | 2386 | 6.9 | 7.0 | 6.7 | ↑ | 0.2  | 3.4E-04 | 6.7E-02 |
| chr6:3094715-3095272   | 558  | 4.2 | 3.8 | 4.4 | ↓ | -0.6 | 4.2E-04 | 7.5E-02 |
| chr6:3095306-3096482   | 1177 | 5.4 | 4.7 | 5.9 | ↓ | -1.3 | 7.6E-28 | 4.8E-23 |
| chr6:3097705-3098677   | 973  | 4.6 | 4.0 | 5.0 | ↓ | -1.1 | 5.7E-13 | 6.0E-09 |
| chr6:31024260-31024524 | 265  | 2.0 | 2.5 | 1.3 | ↑ | 1.2  | 1.4E-04 | 3.6E-02 |
| chr6:31024568-31025285 | 718  | 4.4 | 4.1 | 4.6 | ↓ | -0.6 | 3.8E-04 | 7.1E-02 |
| chr6:31027948-31029108 | 1161 | 4.9 | 5.2 | 4.6 | ↑ | 0.5  | 5.4E-05 | 1.9E-02 |
| chr6:3164545-3165235   | 691  | 4.9 | 4.6 | 5.1 | ↓ | -0.4 | 3.3E-04 | 6.6E-02 |
| chr6:3177817-3179082   | 1266 | 5.9 | 5.7 | 6.1 | ↓ | -0.4 | 5.0E-04 | 8.4E-02 |
| chr6:3179098-3180777   | 1680 | 6.5 | 6.4 | 6.6 | ↓ | -0.2 | 3.3E-04 | 6.4E-02 |
| chr6:3181558-3182781   | 1224 | 4.6 | 4.1 | 5.0 | ↓ | -0.9 | 5.8E-08 | 1.0E-04 |
| chr6:31916116-31916409 | 294  | 3.0 | 3.4 | 2.4 | ↑ | 1.0  | 1.2E-04 | 3.2E-02 |
| chr6:3201687-3202135   | 449  | 3.1 | 2.5 | 3.5 | ↓ | -1.0 | 8.2E-06 | 4.6E-03 |

|                        |      |     |     |     |   |      |         |         |
|------------------------|------|-----|-----|-----|---|------|---------|---------|
| chr6:3204338-3205532   | 1195 | 5.6 | 5.4 | 5.8 | ↓ | -0.4 | 1.1E-04 | 3.0E-02 |
| chr6:3209607-3210217   | 611  | 3.7 | 3.2 | 4.1 | ↓ | -0.9 | 1.2E-05 | 6.1E-03 |
| chr6:3210532-3211126   | 595  | 4.4 | 4.0 | 4.7 | ↓ | -0.6 | 1.9E-05 | 8.6E-03 |
| chr6:3223241-3225229   | 1989 | 6.9 | 6.7 | 7.1 | ↓ | -0.4 | 1.9E-06 | 1.4E-03 |
| chr6:3234724-3235253   | 530  | 5.2 | 5.0 | 5.5 | ↓ | -0.5 | 6.8E-04 | 9.9E-02 |
| chr6:32485618-32486822 | 1205 | 4.8 | 5.0 | 4.6 | ↑ | 0.4  | 5.1E-04 | 8.4E-02 |
| chr6:32791151-32791551 | 401  | 4.3 | 4.0 | 4.5 | ↓ | -0.6 | 1.3E-04 | 3.5E-02 |
| chr6:32864894-32865174 | 281  | 2.5 | 1.6 | 3.0 | ↓ | -1.4 | 2.7E-07 | 3.1E-04 |
| chr6:32915247-32915455 | 209  | 2.5 | 2.9 | 2.0 | ↑ | 0.9  | 4.3E-04 | 7.7E-02 |
| chr6:32948908-32949269 | 362  | 2.8 | 3.1 | 2.3 | ↑ | 0.9  | 3.2E-04 | 6.4E-02 |
| chr6:3312665-3314021   | 1357 | 5.9 | 5.7 | 6.1 | ↓ | -0.4 | 5.1E-05 | 1.8E-02 |
| chr6:33224018-33224143 | 126  | 1.7 | 2.2 | 1.0 | ↑ | 1.2  | 6.8E-04 | 9.9E-02 |
| chr6:33260940-33261274 | 335  | 2.8 | 2.3 | 3.2 | ↓ | -0.9 | 5.1E-04 | 8.4E-02 |
| chr6:33885039-33887655 | 2617 | 6.9 | 6.8 | 7.0 | ↓ | -0.2 | 3.2E-04 | 6.3E-02 |
| chr6:33920472-33921082 | 611  | 8.1 | 7.9 | 8.2 | ↓ | -0.4 | 4.7E-07 | 5.0E-04 |
| chr6:339838-340259     | 422  | 4.0 | 4.3 | 3.8 | ↑ | 0.5  | 6.7E-04 | 9.8E-02 |
| chr6:34522761-34523109 | 349  | 3.4 | 3.7 | 3.0 | ↑ | 0.7  | 4.5E-04 | 7.9E-02 |
| chr6:3488108-3488746   | 639  | 3.4 | 2.9 | 3.7 | ↓ | -0.7 | 1.8E-04 | 4.4E-02 |
| chr6:35493816-35494551 | 736  | 5.1 | 5.3 | 5.0 | ↑ | 0.3  | 6.3E-04 | 9.5E-02 |
| chr6:35553331-35554124 | 794  | 4.6 | 4.1 | 5.0 | ↓ | -0.9 | 1.2E-10 | 7.0E-07 |
| chr6:35573306-35573523 | 218  | 1.8 | 2.3 | 1.1 | ↑ | 1.2  | 2.6E-04 | 5.5E-02 |
| chr6:35793054-35794420 | 1367 | 5.8 | 5.9 | 5.5 | ↑ | 0.4  | 2.7E-04 | 5.7E-02 |
| chr6:35979523-35979914 | 392  | 2.5 | 2.9 | 1.9 | ↑ | 1.0  | 3.0E-04 | 6.1E-02 |
| chr6:36602617-36602829 | 213  | 2.4 | 2.8 | 1.9 | ↑ | 0.9  | 6.1E-04 | 9.2E-02 |
| chr6:36652318-36652918 | 601  | 3.3 | 2.3 | 3.9 | ↓ | -1.6 | 5.4E-13 | 6.0E-09 |
| chr6:36684994-36685278 | 285  | 2.5 | 2.0 | 3.0 | ↓ | -1.0 | 1.4E-04 | 3.6E-02 |
| chr6:36702175-36702518 | 344  | 3.1 | 2.5 | 3.4 | ↓ | -0.9 | 9.7E-05 | 2.9E-02 |
| chr6:36703672-36705005 | 1334 | 5.7 | 5.6 | 5.9 | ↓ | -0.3 | 1.6E-04 | 4.1E-02 |
| chr6:37042495-37042773 | 279  | 2.7 | 1.9 | 3.2 | ↓ | -1.2 | 9.6E-07 | 8.4E-04 |
| chr6:372973-373913     | 941  | 5.3 | 5.0 | 5.5 | ↓ | -0.5 | 1.4E-05 | 6.7E-03 |
| chr6:37707331-37707954 | 624  | 5.4 | 5.2 | 5.6 | ↓ | -0.4 | 4.5E-04 | 7.9E-02 |
| chr6:38625776-38626185 | 410  | 4.1 | 3.6 | 4.4 | ↓ | -0.8 | 1.5E-06 | 1.2E-03 |
| chr6:38974867-38976179 | 1313 | 5.2 | 5.0 | 5.4 | ↓ | -0.4 | 1.8E-04 | 4.4E-02 |
| chr6:39923826-39924125 | 300  | 2.5 | 2.0 | 2.9 | ↓ | -0.9 | 4.1E-04 | 7.4E-02 |
| chr6:4006150-4007029   | 880  | 5.0 | 4.8 | 5.2 | ↓ | -0.4 | 3.2E-04 | 6.4E-02 |
| chr6:40113537-40113911 | 375  | 4.2 | 3.8 | 4.4 | ↓ | -0.6 | 6.2E-04 | 9.3E-02 |
| chr6:40285530-40286103 | 574  | 3.7 | 3.3 | 4.0 | ↓ | -0.7 | 3.9E-04 | 7.2E-02 |
| chr6:40571122-40571440 | 319  | 2.4 | 2.8 | 1.8 | ↑ | 1.0  | 5.2E-04 | 8.5E-02 |
| chr6:4086344-4088291   | 1948 | 6.3 | 6.2 | 6.4 | ↓ | -0.3 | 5.6E-04 | 8.8E-02 |
| chr6:40940176-40940431 | 256  | 2.0 | 1.2 | 2.5 | ↓ | -1.3 | 1.5E-04 | 3.8E-02 |
| chr6:40962897-40963291 | 395  | 4.2 | 3.9 | 4.4 | ↓ | -0.5 | 6.5E-04 | 9.7E-02 |
| chr6:41188108-41188323 | 216  | 1.7 | 2.2 | 0.9 | ↑ | 1.2  | 4.9E-04 | 8.3E-02 |
| chr6:42808923-42809725 | 803  | 4.5 | 4.8 | 4.0 | ↑ | 0.7  | 2.8E-05 | 1.1E-02 |
| chr6:4327816-4328261   | 446  | 3.1 | 2.5 | 3.5 | ↓ | -1.0 | 5.0E-06 | 3.0E-03 |
| chr6:43428666-43429609 | 944  | 5.0 | 4.8 | 5.2 | ↓ | -0.4 | 4.4E-04 | 7.8E-02 |
| chr6:43739702-43739912 | 211  | 1.5 | 2.0 | 0.5 | ↑ | 1.6  | 7.9E-05 | 2.5E-02 |
| chr6:43987181-43987486 | 306  | 3.6 | 3.3 | 3.9 | ↓ | -0.6 | 3.8E-04 | 7.1E-02 |

|                        |      |     |     |     |   |      |         |         |
|------------------------|------|-----|-----|-----|---|------|---------|---------|
| chr6:4415924-4420931   | 5008 | 7.6 | 7.5 | 7.7 | ↓ | -0.2 | 1.5E-04 | 3.9E-02 |
| chr6:45499548-45500020 | 473  | 3.7 | 3.3 | 4.1 | ↓ | -0.8 | 5.2E-04 | 8.5E-02 |
| chr6:45795022-45795337 | 316  | 2.9 | 2.4 | 3.3 | ↓ | -1.0 | 1.6E-04 | 4.1E-02 |
| chr6:45965413-45966811 | 1399 | 6.0 | 5.8 | 6.2 | ↓ | -0.5 | 6.5E-05 | 2.2E-02 |
| chr6:46395572-46395931 | 360  | 2.4 | 2.9 | 1.6 | ↑ | 1.3  | 1.1E-05 | 5.7E-03 |
| chr6:46822490-46822970 | 481  | 4.2 | 3.9 | 4.5 | ↓ | -0.6 | 2.0E-04 | 4.6E-02 |
| chr6:47122920-47123922 | 1003 | 5.4 | 5.0 | 5.7 | ↓ | -0.6 | 1.9E-06 | 1.4E-03 |
| chr6:47459004-47459335 | 332  | 3.8 | 3.4 | 4.1 | ↓ | -0.6 | 5.1E-04 | 8.4E-02 |
| chr6:4750114-4750494   | 381  | 2.8 | 2.2 | 3.2 | ↓ | -1.0 | 8.8E-05 | 2.7E-02 |
| chr6:50519713-50520188 | 476  | 4.7 | 4.4 | 5.0 | ↓ | -0.6 | 1.3E-06 | 1.1E-03 |
| chr6:5066616-5066933   | 318  | 3.0 | 3.4 | 2.6 | ↑ | 0.8  | 2.3E-04 | 5.1E-02 |
| chr6:50792281-50792548 | 268  | 2.9 | 2.4 | 3.4 | ↓ | -1.0 | 4.0E-05 | 1.5E-02 |
| chr6:50835379-50835722 | 344  | 2.6 | 2.0 | 3.0 | ↓ | -1.0 | 2.9E-04 | 6.0E-02 |
| chr6:5092971-5094965   | 1995 | 6.4 | 6.3 | 6.5 | ↓ | -0.2 | 3.0E-04 | 6.0E-02 |
| chr6:51174911-51176807 | 1897 | 5.9 | 5.6 | 6.1 | ↓ | -0.4 | 6.3E-07 | 6.2E-04 |
| chr6:51191922-51194077 | 2156 | 6.6 | 6.5 | 6.7 | ↓ | -0.2 | 6.6E-04 | 9.7E-02 |
| chr6:51271874-51272255 | 382  | 3.9 | 3.5 | 4.2 | ↓ | -0.6 | 9.8E-05 | 2.9E-02 |
| chr6:5141461-5141919   | 459  | 3.8 | 3.3 | 4.2 | ↓ | -0.9 | 6.2E-06 | 3.6E-03 |
| chr6:51858139-51858968 | 830  | 5.2 | 4.9 | 5.4 | ↓ | -0.5 | 2.5E-04 | 5.4E-02 |
| chr6:51882741-51883468 | 728  | 3.8 | 4.2 | 3.2 | ↑ | 1.0  | 1.7E-04 | 4.1E-02 |
| chr6:5334678-5335766   | 1089 | 5.5 | 5.3 | 5.6 | ↓ | -0.4 | 3.5E-04 | 6.8E-02 |
| chr6:53429374-53429778 | 405  | 3.6 | 3.0 | 4.0 | ↓ | -1.0 | 3.6E-06 | 2.3E-03 |
| chr6:54425930-54426266 | 337  | 2.6 | 3.1 | 1.9 | ↑ | 1.2  | 6.7E-06 | 3.8E-03 |
| chr6:54509387-54513446 | 4060 | 9.0 | 8.9 | 9.2 | ↓ | -0.3 | 5.6E-04 | 8.8E-02 |
| chr6:54691637-54692420 | 784  | 5.2 | 4.9 | 5.4 | ↓ | -0.6 | 8.0E-07 | 7.6E-04 |
| chr6:56556173-56558174 | 2002 | 6.7 | 6.6 | 6.9 | ↓ | -0.3 | 1.0E-04 | 2.9E-02 |
| chr6:56571490-56572296 | 807  | 4.0 | 3.6 | 4.2 | ↓ | -0.6 | 4.2E-04 | 7.6E-02 |
| chr6:57106017-57106230 | 214  | 1.7 | 2.3 | 0.9 | ↑ | 1.3  | 1.3E-04 | 3.4E-02 |
| chr6:57673895-57674408 | 514  | 4.6 | 4.4 | 4.8 | ↓ | -0.5 | 1.7E-04 | 4.2E-02 |
| chr6:57870522-57872194 | 1673 | 6.5 | 6.3 | 6.7 | ↓ | -0.4 | 1.5E-04 | 3.8E-02 |
| chr6:58302067-58302944 | 878  | 5.4 | 5.2 | 5.6 | ↓ | -0.4 | 5.6E-04 | 8.8E-02 |
| chr6:58325909-58326477 | 569  | 4.6 | 4.3 | 4.8 | ↓ | -0.5 | 6.6E-04 | 9.7E-02 |
| chr6:58398292-58398640 | 349  | 2.7 | 3.2 | 1.9 | ↑ | 1.3  | 1.5E-06 | 1.2E-03 |
| chr6:5878573-5879040   | 468  | 3.2 | 2.6 | 3.5 | ↓ | -0.9 | 2.7E-05 | 1.1E-02 |
| chr6:58853907-58854328 | 422  | 3.7 | 3.3 | 4.0 | ↓ | -0.7 | 1.3E-04 | 3.4E-02 |
| chr6:59125678-59126852 | 1175 | 5.7 | 5.4 | 5.9 | ↓ | -0.5 | 1.1E-05 | 5.7E-03 |
| chr6:59294363-59296771 | 2409 | 7.5 | 7.3 | 7.6 | ↓ | -0.3 | 1.7E-06 | 1.3E-03 |
| chr6:59459144-59459442 | 299  | 2.2 | 1.6 | 2.6 | ↓ | -1.0 | 5.3E-04 | 8.6E-02 |
| chr6:59503016-59505204 | 2189 | 7.5 | 7.4 | 7.6 | ↓ | -0.2 | 3.5E-04 | 6.7E-02 |
| chr6:5952453-5952658   | 206  | 2.1 | 1.5 | 2.6 | ↓ | -1.1 | 4.2E-04 | 7.6E-02 |
| chr6:59671726-59672208 | 483  | 4.2 | 4.5 | 3.9 | ↑ | 0.6  | 4.9E-06 | 3.0E-03 |
| chr6:59764555-59765122 | 568  | 4.9 | 4.5 | 5.2 | ↓ | -0.7 | 2.5E-05 | 1.1E-02 |
| chr6:59856911-59857663 | 753  | 5.8 | 5.6 | 6.0 | ↓ | -0.4 | 2.1E-06 | 1.5E-03 |
| chr6:59922418-59922741 | 324  | 2.1 | 1.5 | 2.5 | ↓ | -1.0 | 4.8E-04 | 8.2E-02 |
| chr6:59924794-59925669 | 876  | 4.7 | 4.3 | 4.9 | ↓ | -0.6 | 1.5E-04 | 3.8E-02 |
| chr6:59948924-59949569 | 646  | 5.5 | 5.2 | 5.7 | ↓ | -0.5 | 3.5E-05 | 1.4E-02 |
| chr6:60529770-60530279 | 510  | 4.3 | 4.1 | 4.5 | ↓ | -0.5 | 5.5E-04 | 8.8E-02 |

|                        |      |     |     |     |   |      |         |         |
|------------------------|------|-----|-----|-----|---|------|---------|---------|
| chr6:6095029-6095584   | 556  | 4.2 | 3.6 | 4.6 | ↓ | -1.0 | 8.6E-10 | 3.2E-06 |
| chr6:61907532-61907816 | 285  | 2.2 | 2.6 | 1.6 | ↑ | 1.0  | 6.4E-04 | 9.5E-02 |
| chr6:62128497-62129231 | 735  | 4.9 | 4.4 | 5.4 | ↓ | -1.0 | 3.0E-09 | 8.1E-06 |
| chr6:62280244-62280535 | 292  | 3.1 | 3.5 | 2.7 | ↑ | 0.7  | 4.2E-04 | 7.5E-02 |
| chr6:62682343-62683114 | 772  | 4.7 | 4.3 | 5.0 | ↓ | -0.7 | 2.4E-07 | 2.8E-04 |
| chr6:62772825-62773110 | 286  | 3.6 | 3.0 | 4.0 | ↓ | -1.0 | 2.8E-06 | 1.9E-03 |
| chr6:62815433-62815747 | 315  | 2.2 | 1.5 | 2.7 | ↓ | -1.2 | 1.6E-04 | 4.0E-02 |
| chr6:62878767-62879193 | 427  | 3.2 | 2.7 | 3.6 | ↓ | -0.9 | 2.0E-05 | 8.9E-03 |
| chr6:62909999-62910347 | 349  | 3.2 | 2.6 | 3.7 | ↓ | -1.0 | 5.7E-07 | 5.8E-04 |
| chr6:6300930-6301213   | 284  | 3.4 | 3.7 | 3.0 | ↑ | 0.6  | 5.8E-04 | 9.0E-02 |
| chr6:63840515-63840751 | 237  | 1.7 | 0.3 | 2.4 | ↓ | -2.0 | 7.1E-08 | 1.2E-04 |
| chr6:64797370-64799326 | 1957 | 5.8 | 5.9 | 5.6 | ↑ | 0.3  | 6.5E-05 | 2.2E-02 |
| chr6:65067977-65068530 | 554  | 2.8 | 3.2 | 2.2 | ↑ | 1.0  | 3.7E-05 | 1.4E-02 |
| chr6:65082599-65083570 | 972  | 5.9 | 5.7 | 6.1 | ↓ | -0.4 | 5.4E-08 | 1.0E-04 |
| chr6:65172406-65173983 | 1578 | 6.6 | 6.3 | 6.8 | ↓ | -0.5 | 4.8E-08 | 9.2E-05 |
| chr6:65243357-65245505 | 2149 | 6.0 | 6.1 | 5.8 | ↑ | 0.3  | 3.0E-04 | 6.0E-02 |
| chr6:65246643-65249000 | 2358 | 6.3 | 6.5 | 6.2 | ↑ | 0.3  | 7.2E-05 | 2.3E-02 |
| chr6:65249432-65249928 | 497  | 4.8 | 5.0 | 4.5 | ↑ | 0.5  | 4.0E-06 | 2.5E-03 |
| chr6:65252983-65253641 | 659  | 5.8 | 5.6 | 6.0 | ↓ | -0.4 | 2.3E-04 | 5.1E-02 |
| chr6:65256840-65257461 | 622  | 3.7 | 3.1 | 4.1 | ↓ | -1.0 | 1.1E-07 | 1.5E-04 |
| chr6:65468002-65468464 | 463  | 3.2 | 2.7 | 3.5 | ↓ | -0.8 | 2.7E-04 | 5.7E-02 |
| chr6:65536344-65537028 | 685  | 6.2 | 6.0 | 6.4 | ↓ | -0.4 | 4.2E-08 | 8.2E-05 |
| chr6:65732114-65732808 | 695  | 5.0 | 4.7 | 5.2 | ↓ | -0.6 | 4.9E-05 | 1.8E-02 |
| chr6:66489914-66491182 | 1269 | 4.8 | 4.4 | 5.2 | ↓ | -0.8 | 9.7E-07 | 8.4E-04 |
| chr6:66491256-66491706 | 451  | 3.2 | 2.8 | 3.5 | ↓ | -0.7 | 2.6E-04 | 5.6E-02 |
| chr6:66492355-66493212 | 858  | 4.3 | 3.5 | 4.8 | ↓ | -1.3 | 2.0E-12 | 1.8E-08 |
| chr6:66545127-66545792 | 666  | 4.1 | 3.8 | 4.4 | ↓ | -0.6 | 6.1E-04 | 9.2E-02 |
| chr6:66581816-66583020 | 1205 | 4.3 | 3.9 | 4.6 | ↓ | -0.6 | 2.1E-05 | 9.2E-03 |
| chr6:66720559-66721174 | 616  | 4.2 | 3.8 | 4.5 | ↓ | -0.7 | 3.2E-06 | 2.1E-03 |
| chr6:66722475-66722793 | 319  | 3.0 | 2.5 | 3.4 | ↓ | -0.9 | 5.0E-05 | 1.8E-02 |
| chr6:66728471-66728743 | 273  | 2.9 | 2.4 | 3.3 | ↓ | -0.9 | 1.1E-04 | 3.1E-02 |
| chr6:66728970-66729917 | 948  | 4.4 | 4.1 | 4.7 | ↓ | -0.6 | 5.1E-05 | 1.8E-02 |
| chr6:67073051-67073286 | 236  | 3.4 | 2.9 | 3.8 | ↓ | -0.9 | 1.2E-05 | 5.9E-03 |
| chr6:67477516-67478822 | 1307 | 5.6 | 5.3 | 5.8 | ↓ | -0.4 | 3.5E-05 | 1.4E-02 |
| chr6:67704910-67705221 | 312  | 3.6 | 3.2 | 3.9 | ↓ | -0.7 | 5.4E-04 | 8.6E-02 |
| chr6:68202783-68203096 | 314  | 2.3 | 1.8 | 2.8 | ↓ | -1.0 | 4.7E-04 | 8.0E-02 |
| chr6:68302575-68303179 | 605  | 4.6 | 3.9 | 5.1 | ↓ | -1.2 | 6.9E-10 | 2.7E-06 |
| chr6:68326924-68327175 | 252  | 2.6 | 3.0 | 2.1 | ↑ | 1.0  | 1.9E-04 | 4.5E-02 |
| chr6:68377272-68378034 | 763  | 4.9 | 4.6 | 5.2 | ↓ | -0.6 | 1.9E-07 | 2.4E-04 |
| chr6:68867214-68868804 | 1591 | 6.0 | 5.9 | 6.2 | ↓ | -0.3 | 3.3E-05 | 1.3E-02 |
| chr6:69001571-69001771 | 201  | 2.1 | 2.6 | 1.5 | ↑ | 1.1  | 2.4E-04 | 5.3E-02 |
| chr6:69019197-69019465 | 269  | 2.1 | 1.4 | 2.5 | ↓ | -1.1 | 2.1E-04 | 4.8E-02 |
| chr6:69088799-69089219 | 421  | 3.2 | 2.8 | 3.6 | ↓ | -0.8 | 4.3E-04 | 7.6E-02 |
| chr6:69745760-69745988 | 229  | 2.8 | 2.3 | 3.2 | ↓ | -0.8 | 5.8E-04 | 9.0E-02 |
| chr6:69808694-69808992 | 299  | 1.6 | 0.7 | 2.2 | ↓ | -1.5 | 3.9E-05 | 1.5E-02 |
| chr6:70311267-70311665 | 399  | 3.1 | 3.5 | 2.6 | ↑ | 0.8  | 2.6E-04 | 5.6E-02 |
| chr6:70766203-70766861 | 659  | 4.0 | 3.7 | 4.3 | ↓ | -0.6 | 1.4E-04 | 3.7E-02 |

|                        |      |     |     |     |   |      |         |         |
|------------------------|------|-----|-----|-----|---|------|---------|---------|
| chr6:71072609-71072868 | 260  | 2.3 | 2.8 | 1.7 | ↑ | 1.1  | 2.5E-04 | 5.3E-02 |
| chr6:71128774-71129084 | 311  | 2.7 | 3.2 | 2.0 | ↑ | 1.2  | 1.1E-05 | 5.7E-03 |
| chr6:7150369-7150977   | 609  | 3.7 | 3.3 | 4.0 | ↓ | -0.7 | 5.0E-04 | 8.4E-02 |
| chr6:71592132-71592418 | 287  | 2.7 | 2.2 | 3.1 | ↓ | -0.9 | 4.4E-04 | 7.7E-02 |
| chr6:71943091-71943833 | 743  | 4.0 | 3.7 | 4.3 | ↓ | -0.7 | 3.0E-04 | 6.1E-02 |
| chr6:72493240-72493557 | 318  | 2.8 | 2.3 | 3.1 | ↓ | -0.9 | 3.8E-04 | 7.1E-02 |
| chr6:72547711-72547982 | 272  | 2.5 | 1.9 | 2.9 | ↓ | -1.0 | 3.0E-04 | 6.0E-02 |
| chr6:7263877-7265779   | 1903 | 7.2 | 7.3 | 7.1 | ↑ | 0.2  | 5.2E-04 | 8.5E-02 |
| chr6:7265919-7267064   | 1146 | 6.4 | 6.2 | 6.5 | ↓ | -0.3 | 1.2E-04 | 3.3E-02 |
| chr6:72873043-72873332 | 290  | 3.8 | 3.5 | 4.1 | ↓ | -0.6 | 6.0E-04 | 9.2E-02 |
| chr6:72982746-72983319 | 574  | 4.5 | 4.2 | 4.8 | ↓ | -0.6 | 1.4E-05 | 6.7E-03 |
| chr6:73147788-73148402 | 615  | 4.5 | 4.2 | 4.8 | ↓ | -0.5 | 8.9E-05 | 2.7E-02 |
| chr6:7322012-7323943   | 1932 | 7.2 | 7.3 | 7.1 | ↑ | 0.2  | 9.9E-05 | 2.9E-02 |
| chr6:7324059-7326045   | 1987 | 6.6 | 6.8 | 6.4 | ↑ | 0.3  | 8.2E-05 | 2.6E-02 |
| chr6:7326084-7326629   | 546  | 5.2 | 5.0 | 5.4 | ↓ | -0.4 | 2.4E-05 | 1.0E-02 |
| chr6:7362845-7363746   | 902  | 5.0 | 5.3 | 4.8 | ↑ | 0.5  | 4.0E-04 | 7.3E-02 |
| chr6:7387008-7387451   | 444  | 3.3 | 2.9 | 3.7 | ↓ | -0.8 | 1.2E-04 | 3.2E-02 |
| chr6:74019683-74020033 | 351  | 2.8 | 3.2 | 2.3 | ↑ | 0.8  | 5.9E-04 | 9.1E-02 |
| chr6:74341626-74341998 | 373  | 3.2 | 3.6 | 2.7 | ↑ | 0.9  | 1.0E-04 | 2.9E-02 |
| chr6:74721490-74722066 | 577  | 4.2 | 4.5 | 3.9 | ↑ | 0.6  | 3.6E-04 | 6.9E-02 |
| chr6:74724535-74725185 | 651  | 4.6 | 4.8 | 4.3 | ↑ | 0.5  | 1.7E-04 | 4.1E-02 |
| chr6:74750406-74751230 | 825  | 4.8 | 5.1 | 4.5 | ↑ | 0.6  | 7.4E-07 | 7.2E-04 |
| chr6:74758936-74759625 | 690  | 4.4 | 4.7 | 3.9 | ↑ | 0.9  | 1.2E-07 | 1.6E-04 |
| chr6:74760127-74760549 | 423  | 3.3 | 2.6 | 3.8 | ↓ | -1.2 | 1.0E-07 | 1.5E-04 |
| chr6:74772900-74774158 | 1259 | 4.6 | 4.8 | 4.3 | ↑ | 0.5  | 5.3E-05 | 1.9E-02 |
| chr6:74850485-74851024 | 540  | 3.7 | 4.0 | 3.4 | ↑ | 0.6  | 5.3E-04 | 8.6E-02 |
| chr6:75517651-75518796 | 1146 | 4.5 | 4.2 | 4.7 | ↓ | -0.6 | 2.7E-04 | 5.7E-02 |
| chr6:75889213-75890080 | 868  | 5.4 | 5.3 | 5.6 | ↓ | -0.3 | 6.0E-04 | 9.2E-02 |
| chr6:76677624-76678225 | 602  | 3.9 | 3.4 | 4.2 | ↓ | -0.8 | 5.8E-05 | 2.0E-02 |
| chr6:7677607-7679094   | 1488 | 5.7 | 5.5 | 5.9 | ↓ | -0.4 | 1.0E-05 | 5.4E-03 |
| chr6:76783005-76783580 | 576  | 4.1 | 4.5 | 3.6 | ↑ | 0.8  | 3.4E-07 | 3.8E-04 |
| chr6:7680217-7681029   | 813  | 5.0 | 4.6 | 5.3 | ↓ | -0.7 | 3.2E-08 | 6.6E-05 |
| chr6:78141206-78143167 | 1962 | 5.5 | 5.2 | 5.7 | ↓ | -0.4 | 1.7E-06 | 1.3E-03 |
| chr6:78313590-78314704 | 1115 | 5.4 | 5.1 | 5.6 | ↓ | -0.5 | 5.9E-07 | 5.8E-04 |
| chr6:79917664-79918500 | 837  | 5.0 | 5.4 | 4.5 | ↑ | 1.0  | 1.0E-09 | 3.6E-06 |
| chr6:80052371-80052846 | 476  | 5.1 | 4.7 | 5.4 | ↓ | -0.7 | 2.4E-09 | 7.2E-06 |
| chr6:80134077-80134437 | 361  | 3.7 | 3.4 | 4.0 | ↓ | -0.6 | 2.2E-04 | 5.0E-02 |
| chr6:80135210-80135862 | 653  | 4.8 | 4.5 | 5.1 | ↓ | -0.5 | 2.2E-06 | 1.6E-03 |
| chr6:80834633-80835035 | 403  | 3.8 | 3.3 | 4.1 | ↓ | -0.8 | 9.7E-05 | 2.9E-02 |
| chr6:81130099-81130542 | 444  | 3.9 | 4.2 | 3.6 | ↑ | 0.6  | 2.7E-04 | 5.8E-02 |
| chr6:81652660-81652858 | 199  | 1.8 | 2.3 | 1.0 | ↑ | 1.3  | 1.9E-04 | 4.6E-02 |
| chr6:83053500-83054390 | 891  | 5.6 | 5.4 | 5.7 | ↓ | -0.3 | 5.0E-04 | 8.3E-02 |
| chr6:83067567-83067998 | 432  | 3.2 | 2.8 | 3.6 | ↓ | -0.7 | 6.4E-04 | 9.5E-02 |
| chr6:83651247-83651510 | 264  | 2.1 | 1.4 | 2.6 | ↓ | -1.1 | 2.8E-04 | 5.8E-02 |
| chr6:8389173-8389670   | 498  | 4.5 | 4.3 | 4.7 | ↓ | -0.5 | 2.9E-04 | 6.0E-02 |
| chr6:84023313-84025048 | 1736 | 6.5 | 6.3 | 6.6 | ↓ | -0.2 | 2.3E-04 | 5.1E-02 |
| chr6:8503888-8505263   | 1376 | 5.1 | 4.8 | 5.4 | ↓ | -0.6 | 2.7E-05 | 1.1E-02 |

|                          |      |     |     |     |   |      |         |         |
|--------------------------|------|-----|-----|-----|---|------|---------|---------|
| chr6:8542782-8543175     | 394  | 3.5 | 3.1 | 3.8 | ↓ | -0.8 | 3.4E-05 | 1.3E-02 |
| chr6:8550278-8551577     | 1300 | 6.0 | 5.8 | 6.2 | ↓ | -0.4 | 1.1E-06 | 8.9E-04 |
| chr6:8570359-8570848     | 490  | 2.7 | 3.1 | 2.2 | ↑ | 1.0  | 2.8E-04 | 5.8E-02 |
| chr6:85808766-85809010   | 245  | 2.5 | 2.0 | 2.9 | ↓ | -0.9 | 5.1E-04 | 8.4E-02 |
| chr6:86094343-86094749   | 407  | 3.5 | 3.1 | 3.8 | ↓ | -0.7 | 3.4E-04 | 6.6E-02 |
| chr6:86122536-86124808   | 2273 | 5.7 | 5.6 | 5.9 | ↓ | -0.3 | 5.5E-04 | 8.8E-02 |
| chr6:86253615-86253935   | 321  | 2.5 | 1.9 | 2.9 | ↓ | -1.1 | 7.9E-05 | 2.5E-02 |
| chr6:86802612-86803819   | 1208 | 6.2 | 6.1 | 6.4 | ↓ | -0.3 | 3.8E-06 | 2.4E-03 |
| chr6:87015177-87015830   | 654  | 4.1 | 3.7 | 4.4 | ↓ | -0.7 | 2.7E-05 | 1.1E-02 |
| chr6:87186044-87186440   | 397  | 4.6 | 4.3 | 4.8 | ↓ | -0.5 | 3.7E-04 | 7.0E-02 |
| chr6:8762717-8763748     | 1032 | 5.6 | 5.4 | 5.8 | ↓ | -0.4 | 3.1E-04 | 6.1E-02 |
| chr6:88106123-88106386   | 264  | 2.3 | 1.6 | 2.7 | ↓ | -1.1 | 2.0E-04 | 4.7E-02 |
| chr6:88130324-88130612   | 289  | 2.3 | 1.7 | 2.7 | ↓ | -1.0 | 4.5E-04 | 7.9E-02 |
| chr6:88304434-88304791   | 358  | 2.5 | 1.9 | 2.9 | ↓ | -1.0 | 5.2E-04 | 8.5E-02 |
| chr6:8946394-8947760     | 1367 | 5.8 | 5.7 | 6.0 | ↓ | -0.3 | 9.4E-05 | 2.9E-02 |
| chr6:89935976-89937038   | 1063 | 4.6 | 4.9 | 4.3 | ↑ | 0.6  | 6.8E-04 | 9.9E-02 |
| chr6:90251534-90252167   | 634  | 3.1 | 3.5 | 2.7 | ↑ | 0.8  | 2.4E-04 | 5.2E-02 |
| chr6:90255301-90256069   | 769  | 4.3 | 4.0 | 4.6 | ↓ | -0.7 | 1.3E-05 | 6.3E-03 |
| chr6:90441339-90441685   | 347  | 2.6 | 2.1 | 3.1 | ↓ | -1.0 | 1.0E-04 | 3.0E-02 |
| chr6:90733751-90734131   | 381  | 2.8 | 2.3 | 3.2 | ↓ | -0.9 | 3.0E-04 | 6.1E-02 |
| chr6:91303703-91303915   | 213  | 1.7 | 2.2 | 0.9 | ↑ | 1.4  | 9.9E-05 | 2.9E-02 |
| chr6:91353952-91354710   | 759  | 3.6 | 2.8 | 4.1 | ↓ | -1.4 | 2.9E-11 | 1.8E-07 |
| chr6:918869-920676       | 1808 | 6.2 | 6.0 | 6.4 | ↓ | -0.4 | 5.2E-06 | 3.1E-03 |
| chr6:92049092-92049390   | 299  | 2.5 | 1.9 | 2.9 | ↓ | -1.1 | 7.2E-05 | 2.3E-02 |
| chr6:92453073-92453647   | 575  | 3.6 | 3.9 | 3.2 | ↑ | 0.7  | 8.9E-05 | 2.7E-02 |
| chr6:92456489-92457252   | 764  | 5.0 | 5.2 | 4.7 | ↑ | 0.5  | 1.5E-05 | 7.3E-03 |
| chr6:9316174-9316717     | 544  | 4.4 | 4.0 | 4.6 | ↓ | -0.6 | 2.3E-05 | 9.8E-03 |
| chr6:9321899-9322822     | 924  | 6.7 | 6.5 | 6.9 | ↓ | -0.3 | 1.7E-06 | 1.3E-03 |
| chr6:94269421-94269755   | 335  | 2.0 | 1.3 | 2.5 | ↓ | -1.2 | 1.1E-04 | 3.2E-02 |
| chr6:94337641-94337969   | 329  | 3.4 | 2.8 | 3.8 | ↓ | -1.0 | 9.3E-07 | 8.4E-04 |
| chr6:9434301-9435909     | 1609 | 5.7 | 5.5 | 5.8 | ↓ | -0.3 | 4.3E-04 | 7.7E-02 |
| chr6:94353457-94353858   | 402  | 4.6 | 4.4 | 4.8 | ↓ | -0.4 | 3.1E-04 | 6.1E-02 |
| chr6:94529811-94530054   | 244  | 2.8 | 3.2 | 2.2 | ↑ | 0.9  | 2.4E-04 | 5.3E-02 |
| chr6:9490676-9490998     | 323  | 2.7 | 3.0 | 2.2 | ↑ | 0.8  | 5.9E-04 | 9.1E-02 |
| chr6:950232-950522       | 291  | 4.3 | 4.6 | 4.1 | ↑ | 0.5  | 6.1E-04 | 9.2E-02 |
| chr6:96536836-96537595   | 760  | 4.1 | 3.9 | 4.4 | ↓ | -0.5 | 6.2E-04 | 9.3E-02 |
| chr6:98534030-98534892   | 863  | 4.3 | 3.1 | 4.9 | ↓ | -1.8 | 1.1E-22 | 3.3E-18 |
| chr6:9964352-9965234     | 883  | 4.3 | 3.9 | 4.6 | ↓ | -0.7 | 1.1E-06 | 9.3E-04 |
| chr6:99837068-99837425   | 358  | 2.8 | 3.2 | 2.4 | ↑ | 0.8  | 5.3E-04 | 8.6E-02 |
| chr6:99933729-99934276   | 548  | 3.6 | 3.9 | 3.3 | ↑ | 0.7  | 1.9E-04 | 4.5E-02 |
| chr7:101276713-101277029 | 317  | 2.7 | 2.1 | 3.1 | ↓ | -1.1 | 1.5E-05 | 5.7E-03 |
| chr7:101720275-101720626 | 352  | 3.1 | 2.7 | 3.5 | ↓ | -0.9 | 5.3E-04 | 7.2E-02 |
| chr7:102111010-102111591 | 582  | 5.3 | 4.9 | 5.7 | ↓ | -0.8 | 6.0E-08 | 7.1E-05 |
| chr7:102416929-102417310 | 382  | 3.6 | 3.3 | 3.9 | ↓ | -0.7 | 3.7E-04 | 5.8E-02 |
| chr7:102682137-102683653 | 1517 | 6.1 | 5.9 | 6.3 | ↓ | -0.4 | 2.1E-07 | 1.9E-04 |
| chr7:103112818-103113334 | 517  | 5.6 | 5.3 | 5.7 | ↓ | -0.4 | 4.9E-04 | 6.9E-02 |
| chr7:1032848-1033975     | 1128 | 5.7 | 5.3 | 5.9 | ↓ | -0.7 | 8.2E-05 | 2.0E-02 |



|                          |      |     |     |     |   |      |         |         |
|--------------------------|------|-----|-----|-----|---|------|---------|---------|
| chr7:103799369-103799589 | 221  | 1.8 | 2.4 | 1.0 | ↑ | 1.3  | 8.7E-05 | 2.1E-02 |
| chr7:104607467-104607910 | 444  | 3.0 | 2.5 | 3.3 | ↓ | -0.8 | 6.0E-04 | 7.8E-02 |
| chr7:104696640-104697227 | 588  | 4.2 | 3.3 | 4.7 | ↓ | -1.4 | 1.1E-14 | 6.6E-11 |
| chr7:105230324-105231193 | 870  | 4.3 | 4.0 | 4.5 | ↓ | -0.6 | 2.8E-04 | 4.8E-02 |
| chr7:105591594-105592943 | 1350 | 5.8 | 5.5 | 6.0 | ↓ | -0.5 | 2.4E-04 | 4.4E-02 |
| chr7:105626257-105626520 | 264  | 2.3 | 1.8 | 2.7 | ↓ | -0.9 | 7.7E-04 | 9.0E-02 |
| chr7:105892331-105892792 | 462  | 2.6 | 1.9 | 3.1 | ↓ | -1.2 | 2.1E-06 | 1.1E-03 |
| chr7:106003867-106004240 | 374  | 4.2 | 3.9 | 4.4 | ↓ | -0.5 | 4.2E-04 | 6.3E-02 |
| chr7:106029404-106029637 | 234  | 1.9 | 1.0 | 2.4 | ↓ | -1.4 | 4.4E-05 | 1.3E-02 |
| chr7:106035088-106035380 | 293  | 2.5 | 3.0 | 1.6 | ↑ | 1.4  | 7.6E-07 | 5.5E-04 |
| chr7:106035763-106036449 | 687  | 4.1 | 3.5 | 4.4 | ↓ | -0.9 | 1.1E-06 | 6.8E-04 |
| chr7:106257121-106257445 | 325  | 3.3 | 2.9 | 3.6 | ↓ | -0.7 | 6.9E-04 | 8.5E-02 |
| chr7:10698169-10698562   | 394  | 2.4 | 1.7 | 2.8 | ↓ | -1.1 | 5.4E-05 | 1.5E-02 |
| chr7:106990957-106992061 | 1105 | 4.7 | 5.0 | 4.2 | ↑ | 0.8  | 3.7E-06 | 1.8E-03 |
| chr7:107156867-107157231 | 365  | 2.6 | 3.1 | 1.9 | ↑ | 1.2  | 4.5E-06 | 2.1E-03 |
| chr7:107157886-107160436 | 2551 | 6.6 | 6.7 | 6.4 | ↑ | 0.3  | 5.7E-05 | 1.5E-02 |
| chr7:107203319-107204528 | 1210 | 4.3 | 4.7 | 3.9 | ↑ | 0.8  | 2.3E-06 | 1.2E-03 |
| chr7:10721923-10722961   | 1039 | 5.7 | 5.3 | 5.9 | ↓ | -0.6 | 1.7E-08 | 2.2E-05 |
| chr7:107289082-107289481 | 400  | 3.1 | 3.5 | 2.6 | ↑ | 0.8  | 3.0E-04 | 5.1E-02 |
| chr7:107545536-107545873 | 338  | 2.7 | 3.1 | 2.0 | ↑ | 1.1  | 8.5E-06 | 3.6E-03 |
| chr7:107561465-107561954 | 490  | 3.4 | 3.8 | 2.9 | ↑ | 0.9  | 5.2E-06 | 2.4E-03 |
| chr7:107693709-107694051 | 343  | 2.7 | 3.1 | 2.1 | ↑ | 1.0  | 4.4E-05 | 1.3E-02 |
| chr7:107730049-107730479 | 431  | 2.6 | 3.0 | 2.1 | ↑ | 0.9  | 6.5E-04 | 8.1E-02 |
| chr7:107788041-107788437 | 397  | 2.7 | 2.2 | 3.1 | ↓ | -0.9 | 7.2E-04 | 8.7E-02 |
| chr7:107828447-107829392 | 946  | 5.2 | 5.5 | 4.9 | ↑ | 0.6  | 3.6E-05 | 1.1E-02 |
| chr7:108019658-108019856 | 199  | 2.1 | 2.6 | 1.2 | ↑ | 1.4  | 6.8E-06 | 3.0E-03 |
| chr7:108478626-108478978 | 353  | 2.4 | 2.8 | 1.8 | ↑ | 1.0  | 4.0E-04 | 6.2E-02 |
| chr7:1087092-1087636     | 545  | 4.2 | 3.9 | 4.5 | ↓ | -0.6 | 5.0E-04 | 7.0E-02 |
| chr7:10941847-10942223   | 377  | 2.5 | 1.9 | 3.0 | ↓ | -1.1 | 2.8E-05 | 9.1E-03 |
| chr7:109442146-109442471 | 326  | 3.4 | 3.6 | 3.0 | ↑ | 0.7  | 5.2E-04 | 7.2E-02 |
| chr7:110031632-110032109 | 478  | 3.5 | 3.1 | 3.8 | ↓ | -0.7 | 5.2E-04 | 7.1E-02 |
| chr7:110034527-110035104 | 578  | 3.6 | 2.8 | 4.2 | ↓ | -1.4 | 9.5E-14 | 5.2E-10 |
| chr7:110035292-110035504 | 213  | 1.8 | 1.1 | 2.3 | ↓ | -1.2 | 2.3E-04 | 4.4E-02 |
| chr7:110036410-110036798 | 389  | 3.6 | 3.0 | 4.1 | ↓ | -1.0 | 2.8E-06 | 1.4E-03 |
| chr7:110037511-110039565 | 2055 | 6.7 | 6.4 | 6.9 | ↓ | -0.5 | 5.9E-07 | 4.5E-04 |
| chr7:110040032-110040758 | 727  | 4.6 | 4.2 | 4.8 | ↓ | -0.6 | 5.4E-06 | 2.5E-03 |
| chr7:110040782-110043257 | 2476 | 6.3 | 5.8 | 6.6 | ↓ | -0.8 | 3.4E-09 | 5.5E-06 |
| chr7:110043299-110043969 | 671  | 4.3 | 3.9 | 4.6 | ↓ | -0.7 | 8.0E-06 | 3.4E-03 |
| chr7:110044029-110044502 | 474  | 3.0 | 2.3 | 3.5 | ↓ | -1.1 | 4.5E-07 | 3.7E-04 |
| chr7:110230390-110231257 | 868  | 5.5 | 5.3 | 5.7 | ↓ | -0.4 | 7.3E-04 | 8.7E-02 |
| chr7:110232124-110232442 | 319  | 2.6 | 2.2 | 3.0 | ↓ | -0.8 | 7.5E-04 | 8.9E-02 |
| chr7:11130464-11131901   | 1438 | 5.4 | 5.2 | 5.6 | ↓ | -0.3 | 4.4E-04 | 6.6E-02 |
| chr7:11229483-11230399   | 917  | 5.4 | 5.1 | 5.6 | ↓ | -0.5 | 2.1E-04 | 4.1E-02 |
| chr7:11280895-11281271   | 377  | 3.5 | 3.0 | 3.9 | ↓ | -0.9 | 9.1E-06 | 3.8E-03 |
| chr7:113055944-113056524 | 581  | 3.3 | 3.6 | 2.9 | ↑ | 0.7  | 7.9E-04 | 9.2E-02 |
| chr7:113267222-113267534 | 313  | 2.7 | 2.1 | 3.1 | ↓ | -1.1 | 1.9E-05 | 6.9E-03 |
| chr7:113268140-113268366 | 227  | 2.1 | 1.0 | 2.7 | ↓ | -1.6 | 5.0E-07 | 4.0E-04 |

|                          |      |     |     |     |   |      |         |         |
|--------------------------|------|-----|-----|-----|---|------|---------|---------|
| chr7:113268751-113269377 | 627  | 3.9 | 3.5 | 4.1 | ↓ | -0.6 | 3.8E-04 | 5.9E-02 |
| chr7:11332890-11333132   | 243  | 2.0 | 1.3 | 2.4 | ↓ | -1.1 | 6.3E-04 | 8.0E-02 |
| chr7:113402789-113403452 | 664  | 3.1 | 2.6 | 3.5 | ↓ | -0.9 | 6.5E-05 | 1.7E-02 |
| chr7:113428560-113429555 | 996  | 5.0 | 5.4 | 4.5 | ↑ | 0.9  | 1.7E-05 | 6.1E-03 |
| chr7:113431889-113432650 | 762  | 4.2 | 4.5 | 3.8 | ↑ | 0.7  | 1.6E-05 | 5.9E-03 |
| chr7:113551105-113551309 | 205  | 1.6 | 2.2 | 0.7 | ↑ | 1.5  | 4.7E-05 | 1.4E-02 |
| chr7:113623915-113624190 | 276  | 3.2 | 3.6 | 2.7 | ↑ | 0.9  | 5.6E-05 | 1.5E-02 |
| chr7:113796139-113796479 | 341  | 2.7 | 3.1 | 2.1 | ↑ | 0.9  | 4.9E-04 | 6.9E-02 |
| chr7:113898175-113898545 | 371  | 2.2 | 2.6 | 1.6 | ↑ | 1.0  | 5.3E-04 | 7.2E-02 |
| chr7:114130654-114131303 | 650  | 3.2 | 3.6 | 2.8 | ↑ | 0.7  | 3.6E-04 | 5.7E-02 |
| chr7:114136626-114136928 | 303  | 3.4 | 3.9 | 2.8 | ↑ | 1.0  | 1.7E-06 | 9.4E-04 |
| chr7:114139506-114140933 | 1428 | 6.0 | 6.2 | 5.6 | ↑ | 0.6  | 1.1E-05 | 4.5E-03 |
| chr7:114158490-114158693 | 204  | 1.5 | 2.1 | 0.7 | ↑ | 1.3  | 4.6E-04 | 6.8E-02 |
| chr7:114231520-114231977 | 458  | 3.3 | 3.7 | 2.8 | ↑ | 0.9  | 1.3E-05 | 5.0E-03 |
| chr7:11439355-11440219   | 865  | 4.0 | 3.5 | 4.4 | ↓ | -0.9 | 2.4E-09 | 4.0E-06 |
| chr7:11453447-11454023   | 577  | 3.9 | 3.4 | 4.2 | ↓ | -0.7 | 1.8E-04 | 3.6E-02 |
| chr7:11490083-11492291   | 2209 | 6.1 | 5.8 | 6.3 | ↓ | -0.5 | 1.9E-07 | 1.8E-04 |
| chr7:115091868-115092191 | 324  | 1.8 | 0.8 | 2.3 | ↓ | -1.5 | 7.0E-05 | 1.8E-02 |
| chr7:115301037-115301412 | 376  | 1.9 | 2.5 | 0.8 | ↑ | 1.6  | 1.4E-06 | 8.3E-04 |
| chr7:11569955-11570591   | 637  | 4.4 | 4.8 | 4.0 | ↑ | 0.8  | 9.4E-07 | 6.5E-04 |
| chr7:11601407-11602429   | 1023 | 6.0 | 5.9 | 6.2 | ↓ | -0.3 | 1.7E-05 | 6.1E-03 |
| chr7:116184556-116184981 | 426  | 2.8 | 2.3 | 3.2 | ↓ | -0.8 | 3.2E-04 | 5.3E-02 |
| chr7:11651972-11652651   | 680  | 4.4 | 4.1 | 4.7 | ↓ | -0.6 | 4.4E-04 | 6.6E-02 |
| chr7:117753493-117753721 | 229  | 1.8 | 2.3 | 1.1 | ↑ | 1.2  | 7.4E-04 | 8.8E-02 |
| chr7:117770007-117770276 | 270  | 2.2 | 1.7 | 2.7 | ↓ | -1.0 | 7.2E-04 | 8.7E-02 |
| chr7:118104718-118104952 | 235  | 2.5 | 1.8 | 2.9 | ↓ | -1.2 | 2.3E-05 | 7.9E-03 |
| chr7:118187808-118188518 | 711  | 4.4 | 4.1 | 4.6 | ↓ | -0.4 | 8.8E-04 | 9.9E-02 |
| chr7:118259586-118259941 | 356  | 3.4 | 3.0 | 3.7 | ↓ | -0.7 | 3.8E-04 | 5.9E-02 |
| chr7:118569402-118569800 | 399  | 2.8 | 2.2 | 3.2 | ↓ | -0.9 | 2.3E-04 | 4.3E-02 |
| chr7:118942643-118942981 | 339  | 2.8 | 2.3 | 3.2 | ↓ | -0.9 | 2.6E-04 | 4.7E-02 |
| chr7:119694002-119694236 | 235  | 2.0 | 2.5 | 1.4 | ↑ | 1.1  | 6.4E-04 | 8.0E-02 |
| chr7:120208887-120209196 | 310  | 3.1 | 2.7 | 3.4 | ↓ | -0.7 | 7.0E-04 | 8.6E-02 |
| chr7:12030128-12030293   | 166  | 1.8 | 2.3 | 1.1 | ↑ | 1.2  | 4.0E-04 | 6.2E-02 |
| chr7:120362077-120362962 | 886  | 5.4 | 4.9 | 5.7 | ↓ | -0.7 | 1.8E-07 | 1.7E-04 |
| chr7:120457548-120457992 | 445  | 4.3 | 3.7 | 4.7 | ↓ | -1.0 | 1.2E-09 | 2.3E-06 |
| chr7:120491687-120492210 | 524  | 3.0 | 2.6 | 3.4 | ↓ | -0.8 | 8.9E-04 | 9.9E-02 |
| chr7:120789209-120789742 | 534  | 5.2 | 5.0 | 5.4 | ↓ | -0.4 | 4.7E-04 | 6.8E-02 |
| chr7:12080874-12081436   | 563  | 3.0 | 2.5 | 3.4 | ↓ | -0.9 | 1.2E-04 | 2.7E-02 |
| chr7:121024362-121025676 | 1315 | 6.2 | 5.9 | 6.5 | ↓ | -0.7 | 1.2E-07 | 1.2E-04 |
| chr7:121540119-121540341 | 223  | 2.7 | 3.1 | 2.0 | ↑ | 1.1  | 2.8E-04 | 4.8E-02 |
| chr7:12155741-12156126   | 386  | 2.8 | 2.0 | 3.3 | ↓ | -1.3 | 1.7E-06 | 9.4E-04 |
| chr7:121675634-121676148 | 515  | 4.9 | 4.6 | 5.1 | ↓ | -0.4 | 4.4E-04 | 6.6E-02 |
| chr7:121891774-121892282 | 509  | 4.3 | 4.0 | 4.5 | ↓ | -0.5 | 4.7E-04 | 6.8E-02 |
| chr7:121899723-121899989 | 267  | 2.7 | 2.2 | 3.0 | ↓ | -0.9 | 5.6E-04 | 7.4E-02 |
| chr7:122138940-122139702 | 763  | 4.4 | 4.1 | 4.6 | ↓ | -0.5 | 2.7E-04 | 4.8E-02 |
| chr7:122914410-122914666 | 257  | 2.0 | 1.0 | 2.5 | ↓ | -1.5 | 4.6E-06 | 2.2E-03 |
| chr7:123331023-123331574 | 552  | 5.0 | 4.6 | 5.3 | ↓ | -0.7 | 1.6E-10 | 4.5E-07 |

|                          |      |     |     |     |   |      |         |         |
|--------------------------|------|-----|-----|-----|---|------|---------|---------|
| chr7:123353533-123354260 | 728  | 5.1 | 4.8 | 5.4 | ↓ | -0.6 | 1.2E-06 | 7.6E-04 |
| chr7:123473503-123474277 | 775  | 5.0 | 4.5 | 5.4 | ↓ | -0.9 | 9.4E-08 | 1.0E-04 |
| chr7:123478585-123479697 | 1113 | 5.6 | 5.8 | 5.5 | ↑ | 0.3  | 8.5E-04 | 9.7E-02 |
| chr7:123565413-123566885 | 1473 | 5.3 | 4.9 | 5.5 | ↓ | -0.6 | 6.1E-08 | 7.1E-05 |
| chr7:123567670-123568801 | 1132 | 6.5 | 6.3 | 6.7 | ↓ | -0.4 | 4.5E-09 | 7.0E-06 |
| chr7:123589267-123589619 | 353  | 3.9 | 3.6 | 4.2 | ↓ | -0.7 | 1.3E-04 | 2.9E-02 |
| chr7:123632328-123632569 | 242  | 2.4 | 2.8 | 1.9 | ↑ | 0.9  | 5.2E-04 | 7.1E-02 |
| chr7:123686388-123688134 | 1747 | 5.8 | 6.0 | 5.6 | ↑ | 0.4  | 5.2E-07 | 4.1E-04 |
| chr7:123697346-123698385 | 1040 | 4.9 | 4.6 | 5.1 | ↓ | -0.5 | 5.2E-05 | 1.5E-02 |
| chr7:123928441-123929101 | 661  | 3.6 | 3.2 | 4.0 | ↓ | -0.8 | 6.3E-05 | 1.7E-02 |
| chr7:123976295-123976624 | 330  | 2.8 | 2.1 | 3.2 | ↓ | -1.1 | 1.0E-05 | 4.2E-03 |
| chr7:123982697-123983358 | 662  | 4.3 | 3.9 | 4.6 | ↓ | -0.6 | 2.4E-04 | 4.4E-02 |
| chr7:124148458-124150216 | 1759 | 6.8 | 6.6 | 6.9 | ↓ | -0.3 | 8.4E-04 | 9.6E-02 |
| chr7:124242238-124242845 | 608  | 4.0 | 3.6 | 4.3 | ↓ | -0.7 | 2.0E-04 | 3.9E-02 |
| chr7:124446712-124447523 | 812  | 4.9 | 4.7 | 5.1 | ↓ | -0.4 | 7.2E-04 | 8.7E-02 |
| chr7:124577503-124578121 | 619  | 3.3 | 2.9 | 3.6 | ↓ | -0.7 | 2.8E-04 | 4.8E-02 |
| chr7:125161613-125162127 | 515  | 4.1 | 3.7 | 4.3 | ↓ | -0.6 | 2.0E-04 | 3.9E-02 |
| chr7:125611451-125611848 | 398  | 3.3 | 2.8 | 3.7 | ↓ | -0.9 | 1.1E-04 | 2.5E-02 |
| chr7:125730634-125731162 | 529  | 4.1 | 3.7 | 4.4 | ↓ | -0.7 | 4.2E-07 | 3.5E-04 |
| chr7:125923734-125925247 | 1514 | 5.7 | 5.3 | 5.9 | ↓ | -0.6 | 4.4E-11 | 1.3E-07 |
| chr7:126062657-126062944 | 288  | 2.7 | 3.2 | 1.8 | ↑ | 1.4  | 4.9E-08 | 6.0E-05 |
| chr7:126548511-126548823 | 313  | 2.5 | 1.7 | 3.0 | ↓ | -1.3 | 1.2E-06 | 7.6E-04 |
| chr7:127058381-127058937 | 557  | 3.7 | 3.2 | 4.0 | ↓ | -0.8 | 1.4E-04 | 3.0E-02 |
| chr7:127134529-127135016 | 488  | 4.2 | 3.9 | 4.4 | ↓ | -0.5 | 6.3E-04 | 8.0E-02 |
| chr7:127473000-127473355 | 356  | 2.4 | 1.9 | 2.8 | ↓ | -0.9 | 8.6E-04 | 9.7E-02 |
| chr7:127565304-127565851 | 548  | 4.2 | 3.5 | 4.6 | ↓ | -1.2 | 1.2E-12 | 4.5E-09 |
| chr7:127896867-127897964 | 1098 | 4.9 | 4.7 | 5.1 | ↓ | -0.4 | 2.8E-04 | 4.8E-02 |
| chr7:127906828-127908140 | 1313 | 5.7 | 5.4 | 5.9 | ↓ | -0.5 | 8.8E-05 | 2.1E-02 |
| chr7:128627933-128628256 | 324  | 1.8 | 2.3 | 1.2 | ↑ | 1.1  | 4.7E-04 | 6.8E-02 |
| chr7:128682114-128683368 | 1255 | 6.3 | 6.4 | 6.2 | ↑ | 0.2  | 5.5E-04 | 7.4E-02 |
| chr7:12872887-12873324   | 438  | 3.0 | 3.3 | 2.5 | ↑ | 0.8  | 6.5E-04 | 8.1E-02 |
| chr7:128876679-128880455 | 3777 | 7.8 | 7.6 | 7.9 | ↓ | -0.2 | 3.3E-05 | 1.1E-02 |
| chr7:128943894-128944505 | 612  | 5.8 | 5.6 | 5.9 | ↓ | -0.3 | 3.0E-04 | 5.1E-02 |
| chr7:129242595-129242792 | 198  | 2.0 | 1.2 | 2.5 | ↓ | -1.3 | 5.8E-05 | 1.6E-02 |
| chr7:129590230-129590545 | 316  | 3.4 | 3.0 | 3.7 | ↓ | -0.7 | 7.7E-04 | 9.0E-02 |
| chr7:12995974-12996374   | 401  | 4.7 | 4.3 | 5.0 | ↓ | -0.7 | 1.2E-04 | 2.8E-02 |
| chr7:130104778-130104995 | 218  | 2.1 | 1.5 | 2.6 | ↓ | -1.1 | 2.2E-04 | 4.1E-02 |
| chr7:130272970-130277155 | 4186 | 7.6 | 7.4 | 7.7 | ↓ | -0.2 | 8.4E-07 | 5.8E-04 |
| chr7:130395365-130396684 | 1320 | 6.0 | 5.7 | 6.2 | ↓ | -0.5 | 1.3E-06 | 7.9E-04 |
| chr7:130401467-130402011 | 545  | 5.4 | 5.1 | 5.6 | ↓ | -0.5 | 9.9E-07 | 6.6E-04 |
| chr7:130537331-130537850 | 520  | 3.5 | 3.1 | 3.8 | ↓ | -0.7 | 1.9E-04 | 3.8E-02 |
| chr7:13098520-13099285   | 766  | 4.4 | 4.0 | 4.8 | ↓ | -0.8 | 5.7E-06 | 2.6E-03 |
| chr7:13121446-13122019   | 574  | 3.3 | 3.6 | 2.9 | ↑ | 0.7  | 3.1E-04 | 5.2E-02 |
| chr7:132032409-132033545 | 1137 | 5.0 | 4.8 | 5.2 | ↓ | -0.4 | 2.5E-04 | 4.6E-02 |
| chr7:132033586-132034319 | 734  | 4.9 | 4.6 | 5.1 | ↓ | -0.5 | 1.2E-05 | 4.6E-03 |
| chr7:132392344-132393346 | 1003 | 4.4 | 4.1 | 4.7 | ↓ | -0.6 | 1.2E-04 | 2.8E-02 |
| chr7:132495560-132497823 | 2264 | 6.5 | 6.4 | 6.6 | ↓ | -0.2 | 3.4E-04 | 5.5E-02 |

|                          |      |     |     |     |   |      |         |         |
|--------------------------|------|-----|-----|-----|---|------|---------|---------|
| chr7:133966941-133967678 | 738  | 4.6 | 4.3 | 4.8 | ↓ | -0.5 | 2.8E-04 | 4.8E-02 |
| chr7:134045112-134046345 | 1234 | 5.9 | 5.6 | 6.1 | ↓ | -0.4 | 7.9E-05 | 2.0E-02 |
| chr7:1367064-1368393     | 1330 | 5.3 | 4.8 | 5.6 | ↓ | -0.8 | 1.1E-08 | 1.5E-05 |
| chr7:1369105-1371465     | 2361 | 6.3 | 5.9 | 6.7 | ↓ | -0.8 | 1.3E-08 | 1.7E-05 |
| chr7:1385776-1387222     | 1447 | 5.6 | 5.3 | 5.8 | ↓ | -0.5 | 3.4E-04 | 5.5E-02 |
| chr7:14294894-14295391   | 498  | 3.0 | 3.4 | 2.5 | ↑ | 0.9  | 4.9E-04 | 6.9E-02 |
| chr7:14406152-14406813   | 662  | 3.3 | 3.6 | 2.9 | ↑ | 0.7  | 5.0E-04 | 7.0E-02 |
| chr7:14422519-14422838   | 320  | 2.8 | 3.2 | 2.2 | ↑ | 1.0  | 5.9E-04 | 7.7E-02 |
| chr7:14463396-14463675   | 280  | 1.9 | 2.3 | 1.2 | ↑ | 1.1  | 4.7E-04 | 6.8E-02 |
| chr7:1555188-1556599     | 1412 | 7.0 | 6.8 | 7.2 | ↓ | -0.4 | 1.8E-06 | 9.7E-04 |
| chr7:1563788-1567898     | 4111 | 7.9 | 7.7 | 8.0 | ↓ | -0.3 | 1.5E-04 | 3.2E-02 |
| chr7:15732155-15732409   | 255  | 2.1 | 1.5 | 2.6 | ↓ | -1.1 | 4.4E-04 | 6.6E-02 |
| chr7:15733145-15733575   | 431  | 2.7 | 1.8 | 3.3 | ↓ | -1.4 | 1.7E-07 | 1.6E-04 |
| chr7:16090516-16091029   | 514  | 3.9 | 3.4 | 4.4 | ↓ | -1.0 | 7.3E-08 | 8.2E-05 |
| chr7:1631136-1632256     | 1121 | 5.5 | 5.2 | 5.8 | ↓ | -0.6 | 1.2E-09 | 2.3E-06 |
| chr7:1704809-1706918     | 2110 | 7.2 | 7.0 | 7.4 | ↓ | -0.4 | 2.5E-05 | 8.5E-03 |
| chr7:17443362-17443730   | 369  | 3.4 | 3.0 | 3.7 | ↓ | -0.7 | 3.2E-04 | 5.3E-02 |
| chr7:17883072-17883715   | 644  | 3.2 | 2.8 | 3.5 | ↓ | -0.7 | 8.5E-04 | 9.7E-02 |
| chr7:18084271-18084800   | 530  | 4.0 | 3.7 | 4.3 | ↓ | -0.7 | 7.3E-04 | 8.8E-02 |
| chr7:18204652-18205761   | 1110 | 4.6 | 4.8 | 4.2 | ↑ | 0.6  | 1.9E-04 | 3.8E-02 |
| chr7:18209048-18209260   | 213  | 2.5 | 3.0 | 1.8 | ↑ | 1.2  | 1.5E-05 | 5.6E-03 |
| chr7:18415192-18415534   | 343  | 3.1 | 3.5 | 2.6 | ↑ | 0.9  | 5.4E-05 | 1.5E-02 |
| chr7:18832065-18832308   | 244  | 2.1 | 2.5 | 1.4 | ↑ | 1.1  | 4.1E-04 | 6.2E-02 |
| chr7:18988181-18988523   | 343  | 2.3 | 2.7 | 1.7 | ↑ | 1.0  | 2.8E-04 | 4.8E-02 |
| chr7:2108941-2111517     | 2577 | 7.8 | 7.7 | 7.8 | ↓ | -0.2 | 7.6E-04 | 9.0E-02 |
| chr7:2132976-2133661     | 686  | 5.8 | 5.6 | 6.0 | ↓ | -0.5 | 2.0E-06 | 1.1E-03 |
| chr7:21400338-21400627   | 290  | 3.8 | 3.5 | 4.0 | ↓ | -0.6 | 6.1E-04 | 7.8E-02 |
| chr7:220701-223087       | 2387 | 7.0 | 6.8 | 7.1 | ↓ | -0.4 | 5.1E-07 | 4.0E-04 |
| chr7:22399206-22399624   | 419  | 3.4 | 2.8 | 3.9 | ↓ | -1.1 | 1.3E-06 | 7.9E-04 |
| chr7:22401296-22401591   | 296  | 1.5 | 2.0 | 0.8 | ↑ | 1.3  | 5.5E-04 | 7.4E-02 |
| chr7:224942-225988       | 1047 | 5.8 | 5.6 | 6.0 | ↓ | -0.4 | 8.6E-04 | 9.7E-02 |
| chr7:22735-25379         | 2645 | 7.0 | 6.9 | 7.1 | ↓ | -0.2 | 8.5E-05 | 2.1E-02 |
| chr7:228244-229461       | 1218 | 5.5 | 5.3 | 5.6 | ↓ | -0.3 | 4.9E-04 | 6.9E-02 |
| chr7:232217-234966       | 2750 | 6.9 | 6.6 | 7.1 | ↓ | -0.4 | 2.3E-09 | 4.0E-06 |
| chr7:2353812-2354655     | 844  | 3.9 | 3.4 | 4.2 | ↓ | -0.8 | 2.6E-04 | 4.7E-02 |
| chr7:24398784-24399223   | 440  | 3.1 | 2.5 | 3.5 | ↓ | -0.9 | 5.2E-05 | 1.5E-02 |
| chr7:253571-255670       | 2100 | 6.5 | 6.4 | 6.7 | ↓ | -0.2 | 4.6E-04 | 6.8E-02 |
| chr7:2576254-2577730     | 1477 | 6.3 | 6.2 | 6.5 | ↓ | -0.3 | 2.7E-05 | 8.8E-03 |
| chr7:2676856-2678474     | 1619 | 6.1 | 5.9 | 6.3 | ↓ | -0.4 | 7.0E-06 | 3.1E-03 |
| chr7:2683906-2685885     | 1980 | 6.5 | 6.3 | 6.7 | ↓ | -0.4 | 2.1E-05 | 7.2E-03 |
| chr7:2686011-2686534     | 524  | 2.8 | 2.2 | 3.2 | ↓ | -0.9 | 1.8E-04 | 3.6E-02 |
| chr7:27337989-27338323   | 335  | 2.4 | 1.7 | 2.8 | ↓ | -1.2 | 4.7E-05 | 1.4E-02 |
| chr7:28004578-28006837   | 2260 | 6.3 | 6.1 | 6.5 | ↓ | -0.4 | 4.1E-05 | 1.3E-02 |
| chr7:28076488-28076938   | 451  | 2.8 | 2.3 | 3.1 | ↓ | -0.8 | 6.5E-04 | 8.1E-02 |
| chr7:29186606-29187754   | 1149 | 4.2 | 4.5 | 4.0 | ↑ | 0.5  | 6.8E-04 | 8.4E-02 |
| chr7:29188204-29188678   | 475  | 3.0 | 3.4 | 2.5 | ↑ | 0.9  | 1.9E-04 | 3.8E-02 |
| chr7:299916-300642       | 727  | 5.5 | 5.3 | 5.6 | ↓ | -0.4 | 2.7E-04 | 4.8E-02 |

|                        |      |     |     |     |   |      |         |         |
|------------------------|------|-----|-----|-----|---|------|---------|---------|
| chr7:31191599-31191987 | 389  | 2.4 | 2.8 | 1.8 | ↑ | 1.0  | 2.7E-04 | 4.8E-02 |
| chr7:31195614-31196396 | 783  | 4.3 | 4.6 | 3.8 | ↑ | 0.9  | 1.3E-07 | 1.3E-04 |
| chr7:31200054-31200285 | 232  | 1.7 | 2.3 | 0.8 | ↑ | 1.5  | 3.2E-05 | 1.0E-02 |
| chr7:31233286-31233549 | 264  | 2.4 | 2.8 | 1.9 | ↑ | 0.9  | 5.6E-04 | 7.4E-02 |
| chr7:31908548-31908830 | 283  | 2.5 | 1.9 | 2.8 | ↓ | -0.9 | 7.5E-04 | 8.9E-02 |
| chr7:32317851-32318201 | 351  | 3.6 | 3.3 | 3.9 | ↓ | -0.6 | 5.8E-04 | 7.6E-02 |
| chr7:33481499-33481831 | 333  | 2.7 | 3.1 | 2.1 | ↑ | 0.9  | 1.2E-04 | 2.8E-02 |
| chr7:33661338-33662862 | 1525 | 5.1 | 4.5 | 5.4 | ↓ | -0.9 | 2.5E-10 | 6.0E-07 |
| chr7:33674257-33674860 | 604  | 5.7 | 5.6 | 5.9 | ↓ | -0.4 | 1.0E-04 | 2.5E-02 |
| chr7:33919375-33919724 | 350  | 3.8 | 3.4 | 4.2 | ↓ | -0.8 | 1.6E-04 | 3.3E-02 |
| chr7:34180610-34181265 | 656  | 5.8 | 5.6 | 6.0 | ↓ | -0.4 | 5.6E-04 | 7.4E-02 |
| chr7:34657296-34658090 | 795  | 5.4 | 5.0 | 5.7 | ↓ | -0.6 | 8.8E-05 | 2.1E-02 |
| chr7:34669183-34670317 | 1135 | 5.4 | 5.2 | 5.7 | ↓ | -0.5 | 6.0E-06 | 2.7E-03 |
| chr7:34841377-34841921 | 545  | 3.5 | 3.1 | 3.8 | ↓ | -0.7 | 1.5E-04 | 3.2E-02 |
| chr7:34950129-34950366 | 238  | 1.8 | 2.3 | 0.9 | ↑ | 1.3  | 1.3E-04 | 2.8E-02 |
| chr7:36223982-36225900 | 1919 | 6.8 | 6.6 | 7.0 | ↓ | -0.4 | 1.1E-09 | 2.3E-06 |
| chr7:36518675-36519194 | 520  | 4.6 | 4.3 | 4.8 | ↓ | -0.5 | 3.6E-05 | 1.1E-02 |
| chr7:36534749-36535671 | 923  | 4.3 | 4.0 | 4.5 | ↓ | -0.5 | 2.2E-04 | 4.2E-02 |
| chr7:37474726-37475111 | 386  | 2.7 | 2.1 | 3.1 | ↓ | -1.0 | 7.4E-05 | 1.9E-02 |
| chr7:38031742-38032000 | 259  | 2.7 | 2.0 | 3.2 | ↓ | -1.1 | 2.1E-04 | 4.1E-02 |
| chr7:38171034-38171384 | 351  | 3.1 | 3.5 | 2.6 | ↑ | 0.9  | 1.5E-05 | 5.6E-03 |
| chr7:38996913-38997288 | 376  | 2.4 | 1.7 | 2.8 | ↓ | -1.1 | 5.6E-05 | 1.5E-02 |
| chr7:38997949-39001072 | 3124 | 6.5 | 6.1 | 6.9 | ↓ | -0.8 | 5.8E-10 | 1.3E-06 |
| chr7:39002297-39004102 | 1806 | 5.7 | 5.2 | 6.1 | ↓ | -0.9 | 3.0E-13 | 1.3E-09 |
| chr7:39007075-39008149 | 1075 | 5.5 | 5.3 | 5.7 | ↓ | -0.5 | 1.0E-05 | 4.0E-03 |
| chr7:39128685-39129209 | 525  | 2.8 | 2.3 | 3.2 | ↓ | -0.9 | 1.2E-04 | 2.8E-02 |
| chr7:39480841-39481121 | 281  | 2.1 | 1.2 | 2.7 | ↓ | -1.5 | 1.2E-06 | 7.6E-04 |
| chr7:39568026-39568446 | 421  | 3.1 | 2.6 | 3.5 | ↓ | -0.8 | 4.9E-04 | 6.9E-02 |
| chr7:39568578-39569274 | 697  | 4.2 | 3.9 | 4.5 | ↓ | -0.6 | 3.1E-04 | 5.2E-02 |
| chr7:39601241-39601568 | 328  | 2.5 | 1.9 | 3.0 | ↓ | -1.0 | 6.2E-04 | 8.0E-02 |
| chr7:39663135-39663717 | 583  | 3.4 | 2.9 | 3.8 | ↓ | -1.0 | 4.4E-06 | 2.1E-03 |
| chr7:39697889-39698240 | 352  | 4.5 | 4.2 | 4.7 | ↓ | -0.5 | 3.7E-04 | 5.8E-02 |
| chr7:39720616-39721016 | 401  | 3.0 | 2.6 | 3.3 | ↓ | -0.8 | 5.0E-04 | 7.0E-02 |
| chr7:39947553-39948441 | 889  | 5.4 | 5.2 | 5.6 | ↓ | -0.4 | 4.0E-04 | 6.2E-02 |
| chr7:39974027-39974487 | 461  | 2.9 | 2.4 | 3.3 | ↓ | -0.9 | 8.4E-05 | 2.1E-02 |
| chr7:40049129-40049523 | 395  | 3.0 | 2.6 | 3.4 | ↓ | -0.8 | 2.1E-04 | 4.1E-02 |
| chr7:40367797-40368127 | 331  | 2.2 | 2.6 | 1.5 | ↑ | 1.1  | 1.8E-04 | 3.6E-02 |
| chr7:4045662-4046196   | 535  | 4.7 | 4.4 | 4.9 | ↓ | -0.5 | 6.6E-04 | 8.2E-02 |
| chr7:4053725-4054361   | 637  | 3.5 | 3.8 | 3.1 | ↑ | 0.7  | 1.4E-04 | 3.0E-02 |
| chr7:40690453-40691902 | 1450 | 5.1 | 4.9 | 5.3 | ↓ | -0.4 | 3.8E-04 | 5.9E-02 |
| chr7:41351738-41352038 | 301  | 2.0 | 1.4 | 2.5 | ↓ | -1.1 | 4.2E-04 | 6.4E-02 |
| chr7:41863600-41864336 | 737  | 3.4 | 3.8 | 2.8 | ↑ | 1.0  | 2.5E-06 | 1.3E-03 |
| chr7:41897926-41899364 | 1439 | 6.3 | 6.6 | 5.9 | ↑ | 0.7  | 7.9E-09 | 1.1E-05 |
| chr7:42038839-42039472 | 634  | 3.6 | 3.2 | 3.9 | ↓ | -0.7 | 4.2E-04 | 6.4E-02 |
| chr7:42100229-42100481 | 253  | 2.0 | 2.4 | 1.3 | ↑ | 1.1  | 4.1E-04 | 6.3E-02 |
| chr7:42193036-42194044 | 1009 | 4.3 | 4.0 | 4.5 | ↓ | -0.5 | 3.1E-04 | 5.2E-02 |
| chr7:42997583-42997997 | 415  | 3.5 | 3.8 | 3.1 | ↑ | 0.6  | 8.2E-04 | 9.4E-02 |

|                        |      |     |     |     |   |      |         |         |
|------------------------|------|-----|-----|-----|---|------|---------|---------|
| chr7:43151145-43151433 | 289  | 1.8 | 2.3 | 1.1 | ↑ | 1.2  | 3.4E-04 | 5.5E-02 |
| chr7:43179287-43179751 | 465  | 2.2 | 2.6 | 1.6 | ↑ | 1.0  | 6.1E-04 | 7.8E-02 |
| chr7:43344237-43344714 | 478  | 3.4 | 2.9 | 3.7 | ↓ | -0.9 | 4.0E-05 | 1.2E-02 |
| chr7:43630250-43630915 | 666  | 3.6 | 3.9 | 3.2 | ↑ | 0.7  | 1.9E-04 | 3.8E-02 |
| chr7:43697265-43697699 | 435  | 3.5 | 3.1 | 3.8 | ↓ | -0.7 | 5.6E-04 | 7.4E-02 |
| chr7:43764210-43765592 | 1383 | 5.4 | 5.5 | 5.2 | ↑ | 0.3  | 2.0E-04 | 3.9E-02 |
| chr7:44069177-44070571 | 1395 | 6.1 | 6.2 | 6.0 | ↑ | 0.2  | 7.8E-04 | 9.1E-02 |
| chr7:44617885-44618499 | 615  | 3.6 | 4.0 | 3.0 | ↑ | 1.0  | 3.6E-06 | 1.8E-03 |
| chr7:45092531-45092897 | 367  | 2.5 | 2.9 | 1.8 | ↑ | 1.2  | 2.7E-05 | 9.0E-03 |
| chr7:45389809-45391447 | 1639 | 5.5 | 5.8 | 5.3 | ↑ | 0.5  | 8.6E-05 | 2.1E-02 |
| chr7:45446918-45447839 | 922  | 4.6 | 4.8 | 4.3 | ↑ | 0.5  | 2.7E-04 | 4.8E-02 |
| chr7:45500561-45502138 | 1578 | 6.4 | 6.2 | 6.6 | ↓ | -0.4 | 3.3E-04 | 5.4E-02 |
| chr7:4579467-4580014   | 548  | 3.3 | 2.9 | 3.6 | ↓ | -0.7 | 6.5E-04 | 8.1E-02 |
| chr7:4580107-4582780   | 2674 | 6.8 | 6.6 | 6.9 | ↓ | -0.3 | 1.9E-06 | 1.0E-03 |
| chr7:4606143-4607271   | 1129 | 5.2 | 5.3 | 5.0 | ↑ | 0.4  | 4.0E-04 | 6.2E-02 |
| chr7:46402578-46403304 | 727  | 4.7 | 4.4 | 4.9 | ↓ | -0.5 | 5.8E-06 | 2.6E-03 |
| chr7:46403648-46404110 | 463  | 3.6 | 3.1 | 4.0 | ↓ | -0.9 | 1.4E-06 | 8.1E-04 |
| chr7:46434737-46436860 | 2124 | 5.4 | 5.2 | 5.6 | ↓ | -0.4 | 2.7E-05 | 9.0E-03 |
| chr7:46821820-46822205 | 386  | 4.2 | 3.9 | 4.5 | ↓ | -0.6 | 1.3E-04 | 2.9E-02 |
| chr7:46850438-46850867 | 430  | 2.4 | 1.8 | 2.8 | ↓ | -1.0 | 2.8E-04 | 4.9E-02 |
| chr7:46996106-46996598 | 493  | 3.4 | 3.0 | 3.7 | ↓ | -0.7 | 3.9E-04 | 6.0E-02 |
| chr7:46999813-47000803 | 991  | 4.9 | 4.6 | 5.1 | ↓ | -0.5 | 5.3E-05 | 1.5E-02 |
| chr7:47000873-47001465 | 593  | 3.4 | 2.9 | 3.7 | ↓ | -0.8 | 5.2E-05 | 1.5E-02 |
| chr7:47069040-47069682 | 643  | 3.8 | 3.3 | 4.2 | ↓ | -0.9 | 1.8E-06 | 9.7E-04 |
| chr7:47205532-47205887 | 356  | 4.0 | 3.6 | 4.3 | ↓ | -0.7 | 2.3E-04 | 4.3E-02 |
| chr7:48298778-48300013 | 1236 | 4.3 | 4.1 | 4.6 | ↓ | -0.5 | 7.1E-04 | 8.6E-02 |
| chr7:48371316-48371536 | 221  | 2.0 | 1.2 | 2.5 | ↓ | -1.3 | 5.3E-05 | 1.5E-02 |
| chr7:48393250-48394044 | 795  | 3.4 | 2.8 | 3.8 | ↓ | -1.0 | 1.2E-06 | 7.6E-04 |
| chr7:48395027-48395737 | 711  | 4.2 | 3.6 | 4.6 | ↓ | -1.0 | 1.8E-10 | 4.7E-07 |
| chr7:48397322-48398195 | 874  | 4.5 | 4.1 | 4.8 | ↓ | -0.8 | 3.8E-07 | 3.2E-04 |
| chr7:48399078-48402439 | 3362 | 7.2 | 6.9 | 7.4 | ↓ | -0.5 | 1.5E-13 | 7.4E-10 |
| chr7:48408602-48409762 | 1161 | 5.3 | 5.0 | 5.5 | ↓ | -0.5 | 1.4E-05 | 5.2E-03 |
| chr7:48514878-48515296 | 419  | 2.9 | 3.4 | 2.3 | ↑ | 1.2  | 7.5E-07 | 5.5E-04 |
| chr7:49635082-49635478 | 397  | 4.7 | 4.5 | 4.9 | ↓ | -0.4 | 2.3E-04 | 4.3E-02 |
| chr7:4969473-4970228   | 756  | 4.3 | 4.6 | 3.9 | ↑ | 0.7  | 4.5E-05 | 1.3E-02 |
| chr7:50063123-50063323 | 201  | 2.0 | 2.5 | 1.3 | ↑ | 1.2  | 3.1E-04 | 5.2E-02 |
| chr7:5010815-5011121   | 307  | 2.4 | 2.8 | 1.9 | ↑ | 1.0  | 5.9E-04 | 7.6E-02 |
| chr7:50874965-50875247 | 283  | 2.6 | 2.0 | 2.9 | ↓ | -0.9 | 5.2E-04 | 7.1E-02 |
| chr7:52287430-52287654 | 225  | 2.5 | 1.9 | 2.9 | ↓ | -1.0 | 3.2E-04 | 5.3E-02 |
| chr7:5232234-5234768   | 2535 | 6.2 | 6.4 | 6.1 | ↑ | 0.3  | 5.9E-05 | 1.6E-02 |
| chr7:52856733-52857183 | 451  | 2.8 | 3.2 | 2.1 | ↑ | 1.0  | 2.0E-04 | 3.9E-02 |
| chr7:53143442-53144896 | 1455 | 5.0 | 4.7 | 5.3 | ↓ | -0.6 | 9.9E-05 | 2.4E-02 |
| chr7:53156865-53157616 | 752  | 3.6 | 2.9 | 4.0 | ↓ | -1.1 | 7.9E-09 | 1.1E-05 |
| chr7:53374104-53374370 | 267  | 2.5 | 2.9 | 2.0 | ↑ | 0.9  | 6.6E-04 | 8.2E-02 |
| chr7:53408259-53408857 | 599  | 4.0 | 3.7 | 4.3 | ↓ | -0.6 | 8.0E-04 | 9.2E-02 |
| chr7:53869900-53870970 | 1071 | 4.8 | 4.4 | 5.1 | ↓ | -0.7 | 2.0E-05 | 7.0E-03 |
| chr7:53946787-53946993 | 207  | 2.1 | 2.6 | 1.5 | ↑ | 1.1  | 2.2E-04 | 4.2E-02 |

|                        |      |     |     |     |   |      |         |         |
|------------------------|------|-----|-----|-----|---|------|---------|---------|
| chr7:53992398-53992736 | 339  | 2.8 | 2.2 | 3.2 | ↓ | -1.1 | 2.5E-05 | 8.5E-03 |
| chr7:54212358-54213195 | 838  | 4.1 | 4.4 | 3.7 | ↑ | 0.7  | 1.2E-04 | 2.8E-02 |
| chr7:54841614-54842254 | 641  | 3.7 | 4.0 | 3.3 | ↑ | 0.8  | 4.8E-05 | 1.4E-02 |
| chr7:54909640-54910101 | 462  | 4.0 | 3.5 | 4.4 | ↓ | -0.9 | 1.3E-06 | 7.9E-04 |
| chr7:5494005-5494487   | 483  | 2.8 | 2.4 | 3.2 | ↓ | -0.8 | 5.0E-04 | 7.0E-02 |
| chr7:55368315-55370018 | 1704 | 6.3 | 6.1 | 6.4 | ↓ | -0.3 | 2.7E-04 | 4.8E-02 |
| chr7:55574663-55574923 | 261  | 2.2 | 1.3 | 2.7 | ↓ | -1.4 | 1.5E-05 | 5.6E-03 |
| chr7:55889215-55889831 | 617  | 3.5 | 3.1 | 3.8 | ↓ | -0.8 | 7.2E-04 | 8.7E-02 |
| chr7:56482030-56482211 | 182  | 1.7 | 0.9 | 2.3 | ↓ | -1.3 | 1.3E-04 | 2.9E-02 |
| chr7:56578347-56578722 | 376  | 3.2 | 3.6 | 2.9 | ↑ | 0.7  | 5.6E-04 | 7.4E-02 |
| chr7:56586503-56587207 | 705  | 4.6 | 4.9 | 4.4 | ↑ | 0.5  | 3.6E-04 | 5.7E-02 |
| chr7:56736920-56737375 | 456  | 3.5 | 3.9 | 3.0 | ↑ | 0.8  | 2.0E-05 | 6.9E-03 |
| chr7:56857334-56857879 | 546  | 2.5 | 2.9 | 1.9 | ↑ | 1.0  | 3.2E-04 | 5.3E-02 |
| chr7:56888162-56888494 | 333  | 3.5 | 3.1 | 3.8 | ↓ | -0.7 | 1.4E-04 | 3.0E-02 |
| chr7:57098280-57098776 | 497  | 4.1 | 3.8 | 4.3 | ↓ | -0.5 | 8.2E-04 | 9.4E-02 |
| chr7:57171096-57171535 | 440  | 4.7 | 4.4 | 4.9 | ↓ | -0.5 | 1.2E-04 | 2.8E-02 |
| chr7:57640736-57640981 | 246  | 2.4 | 1.8 | 2.8 | ↓ | -1.0 | 4.9E-04 | 6.9E-02 |
| chr7:58190185-58190750 | 566  | 3.6 | 3.2 | 3.9 | ↓ | -0.7 | 6.1E-05 | 1.6E-02 |
| chr7:58316910-58317494 | 585  | 3.0 | 2.2 | 3.5 | ↓ | -1.3 | 4.2E-06 | 2.0E-03 |
| chr7:58517050-58517235 | 186  | 1.8 | 1.0 | 2.4 | ↓ | -1.4 | 7.5E-05 | 1.9E-02 |
| chr7:58678525-58679046 | 522  | 5.0 | 4.8 | 5.2 | ↓ | -0.4 | 4.8E-04 | 6.8E-02 |
| chr7:58818074-58821360 | 3287 | 7.0 | 6.8 | 7.1 | ↓ | -0.2 | 3.6E-05 | 1.1E-02 |
| chr7:59312250-59312428 | 179  | 1.4 | 1.9 | 0.5 | ↑ | 1.4  | 3.2E-04 | 5.3E-02 |
| chr7:5945622-5945803   | 182  | 1.5 | 0.7 | 2.0 | ↓ | -1.3 | 4.5E-04 | 6.7E-02 |
| chr7:60027530-60027887 | 358  | 2.3 | 1.8 | 2.7 | ↓ | -1.0 | 5.2E-04 | 7.1E-02 |
| chr7:60238338-60238659 | 322  | 3.6 | 3.3 | 3.9 | ↓ | -0.6 | 7.9E-04 | 9.2E-02 |
| chr7:60570030-60570464 | 435  | 5.4 | 5.2 | 5.5 | ↓ | -0.4 | 6.1E-04 | 7.8E-02 |
| chr7:60800825-60801142 | 318  | 3.7 | 3.3 | 4.1 | ↓ | -0.7 | 5.0E-05 | 1.4E-02 |
| chr7:61542339-61542568 | 230  | 2.4 | 1.6 | 3.0 | ↓ | -1.3 | 6.5E-07 | 4.9E-04 |
| chr7:61542692-61543032 | 341  | 3.7 | 3.0 | 4.1 | ↓ | -1.1 | 1.2E-07 | 1.2E-04 |
| chr7:61545868-61546234 | 367  | 3.2 | 2.5 | 3.7 | ↓ | -1.2 | 1.2E-07 | 1.2E-04 |
| chr7:61916287-61916647 | 361  | 2.0 | 1.4 | 2.5 | ↓ | -1.1 | 6.6E-04 | 8.2E-02 |
| chr7:63872159-63872384 | 226  | 1.9 | 2.4 | 1.2 | ↑ | 1.2  | 4.8E-04 | 6.8E-02 |
| chr7:6420501-6420973   | 473  | 3.2 | 2.7 | 3.5 | ↓ | -0.8 | 6.7E-04 | 8.2E-02 |
| chr7:64899565-64900887 | 1323 | 4.5 | 4.8 | 4.1 | ↑ | 0.7  | 3.5E-06 | 1.8E-03 |
| chr7:64924834-64925102 | 269  | 1.6 | 2.2 | 0.8 | ↑ | 1.4  | 1.3E-04 | 2.8E-02 |
| chr7:64984806-64985231 | 426  | 2.9 | 3.4 | 2.1 | ↑ | 1.2  | 9.0E-06 | 3.7E-03 |
| chr7:6501570-6502042   | 473  | 5.3 | 5.0 | 5.5 | ↓ | -0.5 | 7.6E-04 | 8.9E-02 |
| chr7:65199644-65199891 | 248  | 2.2 | 2.7 | 1.6 | ↑ | 1.1  | 1.6E-04 | 3.3E-02 |
| chr7:65426637-65427069 | 433  | 3.9 | 4.2 | 3.3 | ↑ | 0.9  | 2.3E-06 | 1.2E-03 |
| chr7:66522123-66522570 | 448  | 3.2 | 2.7 | 3.6 | ↓ | -0.9 | 1.3E-04 | 2.9E-02 |
| chr7:66594563-66595065 | 503  | 3.1 | 2.6 | 3.4 | ↓ | -0.9 | 1.9E-04 | 3.8E-02 |
| chr7:66598228-66598556 | 329  | 2.4 | 1.7 | 2.9 | ↓ | -1.2 | 2.2E-05 | 7.5E-03 |
| chr7:66796380-66796950 | 571  | 3.4 | 2.9 | 3.7 | ↓ | -0.8 | 1.7E-04 | 3.5E-02 |
| chr7:67736596-67736826 | 231  | 2.4 | 1.6 | 2.8 | ↓ | -1.2 | 1.3E-05 | 4.9E-03 |
| chr7:68074593-68074841 | 249  | 2.4 | 1.8 | 2.8 | ↓ | -1.0 | 7.1E-04 | 8.6E-02 |
| chr7:6878081-6878386   | 306  | 2.6 | 1.8 | 3.1 | ↓ | -1.3 | 7.2E-07 | 5.4E-04 |

|                        |      |     |     |     |   |      |         |         |
|------------------------|------|-----|-----|-----|---|------|---------|---------|
| chr7:68880-69616       | 737  | 5.5 | 5.4 | 5.7 | ↓ | -0.3 | 5.8E-04 | 7.6E-02 |
| chr7:69634243-69634641 | 399  | 3.0 | 3.5 | 2.3 | ↑ | 1.2  | 2.3E-07 | 2.0E-04 |
| chr7:69730532-69730730 | 199  | 1.9 | 2.3 | 1.3 | ↑ | 1.1  | 7.0E-04 | 8.6E-02 |
| chr7:70018206-70019949 | 1744 | 6.5 | 6.6 | 6.4 | ↑ | 0.3  | 8.0E-05 | 2.0E-02 |
| chr7:7005129-7005588   | 460  | 3.0 | 2.5 | 3.4 | ↓ | -0.8 | 5.9E-04 | 7.7E-02 |
| chr7:7019167-7019481   | 315  | 2.2 | 1.3 | 2.7 | ↓ | -1.4 | 5.8E-06 | 2.6E-03 |
| chr7:70469087-70469393 | 307  | 2.1 | 2.6 | 1.5 | ↑ | 1.1  | 7.7E-04 | 9.0E-02 |
| chr7:70647794-70648108 | 315  | 3.4 | 3.0 | 3.7 | ↓ | -0.7 | 3.5E-04 | 5.6E-02 |
| chr7:70666341-70667030 | 690  | 3.8 | 4.2 | 3.3 | ↑ | 0.8  | 4.3E-05 | 1.3E-02 |
| chr7:70668133-70668543 | 411  | 3.2 | 3.7 | 2.5 | ↑ | 1.2  | 2.1E-07 | 1.9E-04 |
| chr7:70668590-70669811 | 1222 | 5.0 | 5.7 | 3.8 | ↑ | 1.9  | 2.7E-21 | 6.6E-17 |
| chr7:70675211-70675473 | 263  | 2.9 | 3.5 | 1.9 | ↑ | 1.5  | 9.1E-10 | 1.9E-06 |
| chr7:70676401-70676615 | 215  | 2.4 | 3.0 | 1.5 | ↑ | 1.5  | 7.9E-07 | 5.6E-04 |
| chr7:70677656-70678397 | 742  | 4.1 | 4.4 | 3.8 | ↑ | 0.6  | 1.9E-05 | 6.9E-03 |
| chr7:70678658-70678915 | 258  | 2.1 | 2.6 | 1.4 | ↑ | 1.2  | 1.3E-04 | 2.8E-02 |
| chr7:70680259-70680451 | 193  | 1.7 | 2.2 | 1.0 | ↑ | 1.2  | 8.1E-04 | 9.4E-02 |
| chr7:70682199-70683391 | 1193 | 5.7 | 6.4 | 4.5 | ↑ | 1.9  | 1.1E-19 | 1.3E-15 |
| chr7:70683424-70684769 | 1346 | 5.3 | 6.0 | 4.1 | ↑ | 1.9  | 6.5E-39 | 3.2E-34 |
| chr7:70686097-70686945 | 849  | 4.1 | 4.7 | 3.1 | ↑ | 1.5  | 1.9E-17 | 1.5E-13 |
| chr7:70686964-70688585 | 1622 | 6.3 | 6.5 | 6.0 | ↑ | 0.6  | 1.9E-09 | 3.3E-06 |
| chr7:70689301-70690003 | 703  | 3.9 | 4.5 | 2.8 | ↑ | 1.7  | 5.9E-12 | 2.1E-08 |
| chr7:70697132-70697719 | 588  | 2.7 | 3.1 | 2.2 | ↑ | 0.9  | 2.8E-04 | 4.8E-02 |
| chr7:70700128-70700767 | 640  | 3.5 | 4.2 | 2.3 | ↑ | 1.9  | 4.8E-16 | 3.3E-12 |
| chr7:70702104-70702730 | 627  | 3.2 | 3.6 | 2.8 | ↑ | 0.8  | 1.8E-04 | 3.7E-02 |
| chr7:70703456-70703982 | 527  | 3.6 | 4.0 | 3.1 | ↑ | 0.9  | 9.6E-07 | 6.5E-04 |
| chr7:70754565-70754846 | 282  | 2.3 | 2.8 | 1.7 | ↑ | 1.1  | 1.0E-04 | 2.5E-02 |
| chr7:70903072-70903435 | 364  | 3.3 | 2.8 | 3.7 | ↓ | -0.9 | 3.5E-05 | 1.1E-02 |
| chr7:71095615-71096017 | 403  | 2.6 | 3.0 | 2.1 | ↑ | 0.9  | 4.7E-04 | 6.8E-02 |
| chr7:71775467-71776192 | 726  | 4.4 | 4.2 | 4.7 | ↓ | -0.5 | 1.7E-04 | 3.5E-02 |
| chr7:72349992-72350542 | 551  | 2.7 | 3.1 | 2.2 | ↑ | 0.9  | 2.6E-04 | 4.7E-02 |
| chr7:736108-740739     | 4632 | 8.0 | 7.9 | 8.1 | ↓ | -0.2 | 1.6E-04 | 3.3E-02 |
| chr7:7450151-7450471   | 321  | 3.0 | 2.5 | 3.3 | ↓ | -0.8 | 6.1E-04 | 7.8E-02 |
| chr7:7612796-7613905   | 1110 | 5.6 | 5.4 | 5.7 | ↓ | -0.3 | 7.0E-04 | 8.6E-02 |
| chr7:7672471-7672706   | 236  | 1.9 | 1.2 | 2.4 | ↓ | -1.2 | 4.5E-04 | 6.6E-02 |
| chr7:78883362-78884051 | 690  | 3.8 | 3.4 | 4.1 | ↓ | -0.7 | 4.3E-05 | 1.3E-02 |
| chr7:78886084-78886439 | 356  | 2.9 | 2.3 | 3.4 | ↓ | -1.1 | 9.2E-06 | 3.8E-03 |
| chr7:79106903-79107102 | 200  | 2.3 | 1.6 | 2.7 | ↓ | -1.2 | 6.7E-05 | 1.7E-02 |
| chr7:79570797-79571107 | 311  | 3.6 | 3.9 | 3.3 | ↑ | 0.7  | 3.2E-04 | 5.2E-02 |
| chr7:79851080-79851303 | 224  | 2.1 | 1.4 | 2.5 | ↓ | -1.1 | 5.1E-04 | 7.0E-02 |
| chr7:79896638-79897113 | 476  | 2.9 | 2.2 | 3.3 | ↓ | -1.1 | 1.3E-04 | 2.9E-02 |
| chr7:80250168-80251713 | 1546 | 5.5 | 5.3 | 5.8 | ↓ | -0.5 | 3.1E-04 | 5.2E-02 |
| chr7:80255116-80255382 | 267  | 2.0 | 2.4 | 1.4 | ↑ | 1.1  | 5.5E-04 | 7.4E-02 |
| chr7:80816004-80816285 | 282  | 3.2 | 2.5 | 3.7 | ↓ | -1.2 | 2.9E-08 | 3.7E-05 |
| chr7:81322908-81323632 | 725  | 6.5 | 6.3 | 6.6 | ↓ | -0.3 | 9.9E-05 | 2.4E-02 |
| chr7:81439627-81439916 | 290  | 3.0 | 3.4 | 2.4 | ↑ | 1.0  | 1.2E-04 | 2.8E-02 |
| chr7:82830337-82830770 | 434  | 3.5 | 3.1 | 3.8 | ↓ | -0.7 | 5.6E-04 | 7.4E-02 |
| chr7:8297099-8297636   | 538  | 4.2 | 3.8 | 4.5 | ↓ | -0.7 | 8.4E-05 | 2.1E-02 |



|                        |      |     |     |     |   |      |         |         |
|------------------------|------|-----|-----|-----|---|------|---------|---------|
| chr7:8301163-8301390   | 228  | 1.9 | 1.1 | 2.4 | ↓ | -1.2 | 1.1E-04 | 2.6E-02 |
| chr7:83439633-83440045 | 413  | 2.8 | 1.7 | 3.4 | ↓ | -1.7 | 4.3E-11 | 1.3E-07 |
| chr7:83440616-83441028 | 413  | 2.7 | 1.0 | 3.5 | ↓ | -2.5 | 5.9E-18 | 5.8E-14 |
| chr7:84163017-84163260 | 244  | 1.7 | 1.0 | 2.2 | ↓ | -1.2 | 8.8E-04 | 9.9E-02 |
| chr7:86541956-86542442 | 487  | 3.5 | 3.1 | 3.9 | ↓ | -0.8 | 7.9E-04 | 9.2E-02 |
| chr7:86648521-86648818 | 298  | 2.4 | 2.8 | 1.9 | ↑ | 0.9  | 7.8E-04 | 9.1E-02 |
| chr7:87082424-87082827 | 404  | 2.8 | 2.3 | 3.1 | ↓ | -0.8 | 5.3E-04 | 7.2E-02 |
| chr7:877257-879163     | 1907 | 6.0 | 5.9 | 6.2 | ↓ | -0.3 | 5.5E-04 | 7.4E-02 |
| chr7:87837469-87838251 | 783  | 4.0 | 3.5 | 4.3 | ↓ | -0.8 | 6.2E-06 | 2.8E-03 |
| chr7:88308087-88308341 | 255  | 2.3 | 1.6 | 2.8 | ↓ | -1.3 | 2.0E-05 | 7.0E-03 |
| chr7:88362518-88363171 | 654  | 3.9 | 3.5 | 4.2 | ↓ | -0.7 | 1.5E-04 | 3.1E-02 |
| chr7:88904-89795       | 892  | 5.7 | 5.4 | 5.9 | ↓ | -0.5 | 2.7E-08 | 3.4E-05 |
| chr7:88944815-88945520 | 706  | 3.3 | 3.9 | 2.4 | ↑ | 1.5  | 4.2E-07 | 3.5E-04 |
| chr7:88946567-88946973 | 407  | 2.5 | 2.9 | 1.9 | ↑ | 1.0  | 8.5E-04 | 9.7E-02 |
| chr7:88947104-88948713 | 1610 | 5.3 | 5.8 | 4.6 | ↑ | 1.2  | 1.0E-12 | 4.1E-09 |
| chr7:88948770-88949332 | 563  | 3.5 | 3.9 | 2.9 | ↑ | 1.0  | 1.0E-06 | 6.8E-04 |
| chr7:88951007-88951843 | 837  | 5.0 | 5.2 | 4.7 | ↑ | 0.6  | 6.6E-05 | 1.7E-02 |
| chr7:88960433-88962591 | 2159 | 5.3 | 5.0 | 5.6 | ↓ | -0.7 | 5.7E-09 | 8.7E-06 |
| chr7:88963505-88964166 | 662  | 4.1 | 3.8 | 4.4 | ↓ | -0.6 | 3.7E-05 | 1.2E-02 |
| chr7:88974981-88975449 | 469  | 3.4 | 3.9 | 2.5 | ↑ | 1.4  | 6.3E-10 | 1.4E-06 |
| chr7:88975502-88976275 | 774  | 3.6 | 4.3 | 2.3 | ↑ | 2.0  | 1.2E-20 | 2.0E-16 |
| chr7:89074938-89075206 | 269  | 3.4 | 3.0 | 3.7 | ↓ | -0.7 | 2.7E-04 | 4.8E-02 |
| chr7:8956747-8958236   | 1490 | 5.7 | 5.5 | 5.8 | ↓ | -0.3 | 3.6E-04 | 5.7E-02 |
| chr7:89760239-89760589 | 351  | 2.5 | 2.9 | 1.8 | ↑ | 1.1  | 5.4E-05 | 1.5E-02 |
| chr7:89799744-89800276 | 533  | 3.8 | 3.5 | 4.1 | ↓ | -0.6 | 5.6E-04 | 7.4E-02 |
| chr7:89808472-89808925 | 454  | 3.8 | 4.1 | 3.4 | ↑ | 0.7  | 5.5E-04 | 7.4E-02 |
| chr7:89889959-89890358 | 400  | 3.6 | 3.9 | 3.2 | ↑ | 0.7  | 1.4E-04 | 3.0E-02 |
| chr7:9042170-9042624   | 455  | 3.1 | 2.7 | 3.4 | ↓ | -0.7 | 6.7E-04 | 8.3E-02 |
| chr7:9045544-9046549   | 1006 | 5.3 | 5.1 | 5.4 | ↓ | -0.4 | 1.3E-04 | 2.8E-02 |
| chr7:90517283-90517591 | 309  | 3.4 | 2.9 | 3.7 | ↓ | -0.8 | 1.7E-04 | 3.5E-02 |
| chr7:90750697-90751043 | 347  | 3.7 | 3.4 | 4.0 | ↓ | -0.7 | 2.5E-04 | 4.6E-02 |
| chr7:9100937-9101488   | 552  | 3.6 | 3.1 | 3.9 | ↓ | -0.9 | 4.1E-05 | 1.3E-02 |
| chr7:91138687-91138968 | 282  | 2.3 | 2.8 | 1.7 | ↑ | 1.1  | 3.3E-04 | 5.3E-02 |
| chr7:91295723-91296497 | 775  | 4.7 | 4.4 | 4.9 | ↓ | -0.5 | 2.2E-04 | 4.2E-02 |
| chr7:9154385-9154824   | 440  | 3.1 | 2.5 | 3.5 | ↓ | -0.9 | 1.8E-04 | 3.6E-02 |
| chr7:91841629-91842416 | 788  | 3.8 | 4.1 | 3.4 | ↑ | 0.7  | 2.9E-05 | 9.5E-03 |
| chr7:92327614-92328101 | 488  | 3.2 | 3.5 | 2.7 | ↑ | 0.9  | 4.2E-05 | 1.3E-02 |
| chr7:9244929-9245573   | 645  | 5.0 | 4.7 | 5.2 | ↓ | -0.5 | 2.5E-04 | 4.6E-02 |
| chr7:9358452-9359229   | 778  | 4.2 | 3.8 | 4.5 | ↓ | -0.7 | 8.8E-06 | 3.7E-03 |
| chr7:93915982-93916236 | 255  | 2.1 | 1.5 | 2.5 | ↓ | -1.1 | 4.6E-04 | 6.8E-02 |
| chr7:93917267-93917687 | 421  | 4.1 | 3.8 | 4.4 | ↓ | -0.6 | 1.6E-05 | 6.0E-03 |
| chr7:95321179-95321413 | 235  | 2.9 | 2.3 | 3.3 | ↓ | -1.0 | 1.9E-05 | 6.9E-03 |
| chr7:96230540-96230876 | 337  | 2.7 | 1.9 | 3.2 | ↓ | -1.3 | 9.2E-08 | 9.9E-05 |
| chr7:96372928-96373199 | 272  | 2.1 | 1.4 | 2.6 | ↓ | -1.1 | 2.9E-04 | 4.9E-02 |
| chr7:98308604-98309108 | 505  | 3.2 | 3.5 | 2.8 | ↑ | 0.7  | 7.4E-04 | 8.8E-02 |
| chr7:98523822-98524713 | 892  | 5.0 | 5.2 | 4.7 | ↑ | 0.6  | 7.7E-06 | 3.3E-03 |
| chr7:98604515-98605719 | 1205 | 4.5 | 4.0 | 4.9 | ↓ | -0.9 | 7.8E-08 | 8.7E-05 |

|                          |      |     |     |     |   |      |         |         |
|--------------------------|------|-----|-----|-----|---|------|---------|---------|
| chr7:98606439-98607521   | 1083 | 5.4 | 5.0 | 5.8 | ↓ | -0.8 | 1.0E-11 | 3.3E-08 |
| chr7:98611466-98612932   | 1467 | 6.5 | 6.3 | 6.6 | ↓ | -0.3 | 4.6E-04 | 6.8E-02 |
| chr7:98780975-98781806   | 832  | 4.9 | 4.7 | 5.1 | ↓ | -0.4 | 8.7E-04 | 9.8E-02 |
| chr7:9882651-9883230     | 580  | 4.1 | 3.6 | 4.4 | ↓ | -0.8 | 1.7E-06 | 9.4E-04 |
| chr7:99743357-99744418   | 1062 | 4.3 | 4.6 | 4.0 | ↑ | 0.6  | 3.6E-04 | 5.7E-02 |
| chr7:99877461-99877772   | 312  | 2.6 | 3.0 | 2.1 | ↑ | 0.9  | 2.1E-04 | 4.0E-02 |
| chr8:10341478-10341776   | 299  | 2.2 | 1.6 | 2.7 | ↓ | -1.1 | 1.7E-04 | 3.9E-02 |
| chr8:103466439-103467096 | 658  | 3.9 | 3.5 | 4.2 | ↓ | -0.7 | 4.3E-04 | 7.0E-02 |
| chr8:103530299-103530707 | 409  | 2.9 | 2.4 | 3.2 | ↓ | -0.8 | 3.4E-04 | 6.1E-02 |
| chr8:103639669-103640114 | 446  | 2.8 | 2.3 | 3.2 | ↓ | -0.9 | 4.0E-04 | 6.7E-02 |
| chr8:103641626-103642106 | 481  | 2.5 | 1.5 | 3.1 | ↓ | -1.6 | 1.1E-08 | 1.4E-05 |
| chr8:103643254-103644304 | 1051 | 4.2 | 3.6 | 4.6 | ↓ | -1.0 | 2.6E-09 | 4.0E-06 |
| chr8:103645981-103647253 | 1273 | 5.1 | 4.4 | 5.5 | ↓ | -1.1 | 5.1E-20 | 2.9E-16 |
| chr8:103647507-103647985 | 479  | 2.3 | 1.5 | 2.8 | ↓ | -1.3 | 1.0E-05 | 5.0E-03 |
| chr8:103648394-103649009 | 616  | 2.6 | 1.7 | 3.1 | ↓ | -1.4 | 2.0E-07 | 1.9E-04 |
| chr8:103650915-103651914 | 1000 | 4.8 | 4.5 | 5.0 | ↓ | -0.5 | 5.5E-04 | 8.1E-02 |
| chr8:103720131-103720686 | 556  | 3.0 | 2.4 | 3.4 | ↓ | -1.0 | 7.7E-06 | 3.9E-03 |
| chr8:105060262-105061513 | 1252 | 4.3 | 3.9 | 4.6 | ↓ | -0.7 | 2.1E-04 | 4.4E-02 |
| chr8:106588425-106588781 | 357  | 2.8 | 2.3 | 3.2 | ↓ | -0.9 | 8.4E-05 | 2.3E-02 |
| chr8:107151022-107151461 | 440  | 2.4 | 1.5 | 3.0 | ↓ | -1.5 | 3.2E-07 | 2.8E-04 |
| chr8:107170438-107171116 | 679  | 4.0 | 3.7 | 4.3 | ↓ | -0.6 | 7.6E-04 | 9.9E-02 |
| chr8:107182224-107182582 | 359  | 2.3 | 1.6 | 2.8 | ↓ | -1.2 | 1.2E-05 | 5.3E-03 |
| chr8:107279159-107279517 | 359  | 2.4 | 2.9 | 1.6 | ↑ | 1.2  | 1.1E-05 | 5.1E-03 |
| chr8:107329099-107329700 | 602  | 2.8 | 3.2 | 2.3 | ↑ | 0.9  | 1.6E-04 | 3.6E-02 |
| chr8:10740451-10741404   | 954  | 3.8 | 3.5 | 4.1 | ↓ | -0.6 | 3.6E-04 | 6.3E-02 |
| chr8:107445518-107446186 | 669  | 3.0 | 3.5 | 2.4 | ↑ | 1.1  | 1.2E-06 | 8.3E-04 |
| chr8:107661420-107661745 | 326  | 2.4 | 2.9 | 1.5 | ↑ | 1.4  | 6.1E-07 | 4.5E-04 |
| chr8:107669934-107671169 | 1236 | 4.4 | 4.7 | 4.1 | ↑ | 0.6  | 5.9E-04 | 8.7E-02 |
| chr8:107713450-107713753 | 304  | 2.0 | 2.5 | 1.2 | ↑ | 1.3  | 1.3E-04 | 3.2E-02 |
| chr8:107797006-107797436 | 431  | 2.4 | 2.8 | 1.9 | ↑ | 0.9  | 7.2E-04 | 9.6E-02 |
| chr8:107856584-107857147 | 564  | 3.2 | 3.6 | 2.6 | ↑ | 1.0  | 6.6E-05 | 1.9E-02 |
| chr8:108218355-108218908 | 554  | 3.3 | 2.8 | 3.6 | ↓ | -0.9 | 3.4E-05 | 1.2E-02 |
| chr8:108307874-108308740 | 867  | 3.7 | 4.0 | 3.4 | ↑ | 0.6  | 5.0E-04 | 7.7E-02 |
| chr8:108309471-108309867 | 397  | 2.6 | 3.0 | 2.1 | ↑ | 0.9  | 4.4E-04 | 7.1E-02 |
| chr8:108413591-108414050 | 460  | 2.9 | 3.2 | 2.4 | ↑ | 0.8  | 6.5E-04 | 9.0E-02 |
| chr8:108414103-108414913 | 811  | 4.9 | 5.2 | 4.5 | ↑ | 0.7  | 1.2E-05 | 5.5E-03 |
| chr8:112318027-112318680 | 654  | 3.7 | 3.2 | 4.0 | ↓ | -0.7 | 7.4E-05 | 2.1E-02 |
| chr8:112404193-112405659 | 1467 | 4.8 | 4.2 | 5.2 | ↓ | -1.0 | 1.5E-10 | 2.9E-07 |
| chr8:112406066-112406590 | 525  | 2.6 | 2.0 | 3.0 | ↓ | -1.1 | 3.6E-05 | 1.2E-02 |
| chr8:112408978-112409321 | 344  | 1.8 | 1.1 | 2.3 | ↓ | -1.2 | 3.6E-04 | 6.2E-02 |
| chr8:114429377-114429823 | 447  | 2.0 | 2.4 | 1.3 | ↑ | 1.2  | 5.1E-04 | 7.8E-02 |
| chr8:115096761-115096965 | 205  | 1.6 | 0.7 | 2.1 | ↓ | -1.4 | 1.3E-04 | 3.2E-02 |
| chr8:115965146-115965663 | 518  | 3.0 | 3.3 | 2.5 | ↑ | 0.8  | 6.1E-04 | 8.8E-02 |
| chr8:116567418-116567773 | 356  | 2.6 | 2.0 | 3.1 | ↓ | -1.0 | 4.0E-05 | 1.3E-02 |
| chr8:116721249-116721551 | 303  | 2.7 | 2.0 | 3.1 | ↓ | -1.1 | 1.8E-05 | 7.2E-03 |
| chr8:116785606-116786578 | 973  | 3.8 | 3.4 | 4.1 | ↓ | -0.6 | 3.2E-04 | 5.8E-02 |
| chr8:117346713-117347246 | 534  | 3.9 | 4.3 | 3.5 | ↑ | 0.7  | 5.9E-05 | 1.7E-02 |

|                          |      |     |     |     |   |      |         |         |
|--------------------------|------|-----|-----|-----|---|------|---------|---------|
| chr8:117859526-117859873 | 348  | 3.5 | 3.0 | 3.9 | ↓ | -1.0 | 3.3E-06 | 2.1E-03 |
| chr8:119638101-119638487 | 387  | 2.4 | 2.8 | 1.8 | ↑ | 1.0  | 6.0E-04 | 8.8E-02 |
| chr8:119909380-119913356 | 3977 | 6.3 | 7.0 | 4.9 | ↑ | 2.1  | 9.1E-24 | 1.1E-19 |
| chr8:119913677-119914112 | 436  | 2.3 | 2.8 | 1.5 | ↑ | 1.3  | 9.6E-06 | 4.8E-03 |
| chr8:119914134-119914526 | 393  | 2.1 | 2.7 | 0.8 | ↑ | 2.0  | 6.4E-09 | 9.3E-06 |
| chr8:119914573-119915904 | 1332 | 4.5 | 5.2 | 3.1 | ↑ | 2.1  | 1.3E-28 | 4.5E-24 |
| chr8:119918692-119919119 | 428  | 2.2 | 2.7 | 1.3 | ↑ | 1.4  | 4.1E-06 | 2.5E-03 |
| chr8:119921081-119922011 | 931  | 3.0 | 3.6 | 1.8 | ↑ | 1.8  | 3.3E-13 | 1.1E-09 |
| chr8:119922140-119922911 | 772  | 3.9 | 4.6 | 2.5 | ↑ | 2.1  | 7.0E-27 | 1.2E-22 |
| chr8:119923238-119925564 | 2327 | 6.2 | 6.8 | 4.9 | ↑ | 1.9  | 1.7E-23 | 1.5E-19 |
| chr8:119927387-119928645 | 1259 | 4.3 | 5.0 | 3.1 | ↑ | 1.9  | 1.2E-18 | 6.0E-15 |
| chr8:119928836-119929444 | 609  | 2.6 | 3.1 | 1.7 | ↑ | 1.5  | 2.4E-07 | 2.2E-04 |
| chr8:119931928-119932853 | 926  | 3.6 | 4.2 | 2.6 | ↑ | 1.6  | 1.1E-12 | 2.6E-09 |
| chr8:120643851-120644276 | 426  | 2.5 | 2.9 | 1.9 | ↑ | 1.0  | 8.6E-05 | 2.3E-02 |
| chr8:121797067-121797596 | 530  | 3.8 | 3.3 | 4.2 | ↓ | -0.9 | 5.6E-07 | 4.3E-04 |
| chr8:122189965-122190493 | 529  | 5.3 | 4.7 | 5.8 | ↓ | -1.1 | 1.7E-12 | 3.7E-09 |
| chr8:122208197-122210072 | 1876 | 6.3 | 6.1 | 6.4 | ↓ | -0.3 | 1.3E-04 | 3.2E-02 |
| chr8:122435660-122436075 | 416  | 2.6 | 3.0 | 2.1 | ↑ | 0.9  | 5.8E-04 | 8.6E-02 |
| chr8:123573185-123573495 | 311  | 2.3 | 2.7 | 1.8 | ↑ | 0.9  | 6.4E-04 | 9.0E-02 |
| chr8:12452081-12452639   | 559  | 3.5 | 3.1 | 3.8 | ↓ | -0.6 | 7.2E-04 | 9.6E-02 |
| chr8:125499301-125499621 | 321  | 2.5 | 1.9 | 3.0 | ↓ | -1.0 | 1.0E-04 | 2.6E-02 |
| chr8:12617080-12617416   | 337  | 2.4 | 1.8 | 2.9 | ↓ | -1.2 | 1.5E-04 | 3.6E-02 |
| chr8:128043511-128044158 | 648  | 2.8 | 2.1 | 3.2 | ↓ | -1.1 | 2.1E-05 | 7.9E-03 |
| chr8:128845027-128845728 | 702  | 3.4 | 3.0 | 3.8 | ↓ | -0.7 | 2.3E-04 | 4.7E-02 |
| chr8:129865815-129866771 | 957  | 5.8 | 5.4 | 6.1 | ↓ | -0.7 | 5.4E-13 | 1.5E-09 |
| chr8:130889139-130889506 | 368  | 3.0 | 2.6 | 3.4 | ↓ | -0.8 | 1.9E-04 | 4.2E-02 |
| chr8:130924501-130924939 | 439  | 2.8 | 3.2 | 2.1 | ↑ | 1.2  | 2.1E-05 | 8.0E-03 |
| chr8:131829071-131829893 | 823  | 3.9 | 3.6 | 4.2 | ↓ | -0.6 | 4.7E-04 | 7.4E-02 |
| chr8:13356589-13357011   | 423  | 3.1 | 3.6 | 2.3 | ↑ | 1.3  | 4.1E-08 | 4.6E-05 |
| chr8:133596341-133597016 | 676  | 3.6 | 3.9 | 3.2 | ↑ | 0.7  | 6.1E-04 | 8.8E-02 |
| chr8:133702599-133702882 | 284  | 2.2 | 2.7 | 1.4 | ↑ | 1.3  | 6.3E-05 | 1.8E-02 |
| chr8:133956235-133956564 | 330  | 2.2 | 1.4 | 2.6 | ↓ | -1.2 | 1.1E-04 | 2.9E-02 |
| chr8:133958627-133959671 | 1045 | 3.4 | 2.9 | 3.8 | ↓ | -0.9 | 6.0E-06 | 3.2E-03 |
| chr8:134458505-134459955 | 1451 | 4.6 | 4.8 | 4.4 | ↑ | 0.5  | 2.7E-04 | 5.1E-02 |
| chr8:135352513-135353003 | 491  | 3.1 | 2.4 | 3.6 | ↓ | -1.3 | 1.4E-07 | 1.4E-04 |
| chr8:135545705-135546027 | 323  | 2.4 | 2.8 | 1.7 | ↑ | 1.0  | 5.3E-04 | 8.0E-02 |
| chr8:136289528-136290362 | 835  | 3.4 | 3.9 | 2.8 | ↑ | 1.0  | 1.1E-05 | 5.1E-03 |
| chr8:138063743-138064304 | 562  | 2.4 | 2.9 | 1.9 | ↑ | 1.0  | 4.8E-04 | 7.5E-02 |
| chr8:138750198-138750937 | 740  | 3.2 | 2.7 | 3.5 | ↓ | -0.8 | 3.6E-04 | 6.3E-02 |
| chr8:139306940-139307452 | 513  | 2.5 | 2.9 | 1.9 | ↑ | 1.0  | 2.8E-04 | 5.3E-02 |
| chr8:139343775-139344104 | 330  | 2.2 | 2.7 | 1.6 | ↑ | 1.1  | 3.9E-04 | 6.6E-02 |
| chr8:140634127-140634891 | 765  | 2.4 | 2.8 | 1.8 | ↑ | 1.0  | 3.9E-04 | 6.6E-02 |
| chr8:141052634-141053102 | 469  | 3.0 | 2.4 | 3.4 | ↓ | -1.1 | 6.6E-06 | 3.5E-03 |
| chr8:141535057-141535698 | 642  | 3.4 | 3.8 | 3.0 | ↑ | 0.7  | 8.2E-05 | 2.2E-02 |
| chr8:141537317-141537837 | 521  | 3.3 | 3.7 | 2.6 | ↑ | 1.1  | 1.8E-04 | 4.0E-02 |
| chr8:141547756-141548265 | 510  | 2.9 | 3.3 | 2.4 | ↑ | 1.0  | 6.6E-05 | 1.9E-02 |
| chr8:141634520-141635023 | 504  | 2.8 | 3.1 | 2.3 | ↑ | 0.8  | 5.1E-04 | 7.7E-02 |

|                          |      |     |     |     |   |      |         |         |
|--------------------------|------|-----|-----|-----|---|------|---------|---------|
| chr8:141649222-141649580 | 359  | 2.1 | 2.5 | 1.5 | ↑ | 1.0  | 6.0E-04 | 8.8E-02 |
| chr8:141658857-141659556 | 700  | 3.6 | 3.9 | 3.1 | ↑ | 0.8  | 3.8E-04 | 6.5E-02 |
| chr8:141819517-141819792 | 276  | 1.9 | 0.9 | 2.5 | ↓ | -1.6 | 1.8E-05 | 7.3E-03 |
| chr8:142304769-142305733 | 965  | 4.1 | 3.6 | 4.5 | ↓ | -0.8 | 1.8E-06 | 1.2E-03 |
| chr8:142307861-142309296 | 1436 | 4.7 | 4.4 | 5.0 | ↓ | -0.6 | 5.3E-07 | 4.1E-04 |
| chr8:142344110-142344703 | 594  | 3.3 | 2.9 | 3.7 | ↓ | -0.8 | 2.7E-05 | 9.6E-03 |
| chr8:142693376-142693735 | 360  | 1.9 | 1.2 | 2.4 | ↓ | -1.2 | 1.5E-04 | 3.6E-02 |
| chr8:143215002-143215969 | 968  | 5.2 | 4.9 | 5.4 | ↓ | -0.5 | 5.7E-05 | 1.7E-02 |
| chr8:143320422-143321877 | 1456 | 5.5 | 5.3 | 5.7 | ↓ | -0.4 | 6.5E-04 | 9.0E-02 |
| chr8:143677657-143678235 | 579  | 3.8 | 3.3 | 4.1 | ↓ | -0.8 | 1.3E-05 | 5.6E-03 |
| chr8:144198663-144199533 | 871  | 3.7 | 3.3 | 4.0 | ↓ | -0.7 | 2.3E-04 | 4.8E-02 |
| chr8:144914386-144915741 | 1356 | 5.2 | 4.9 | 5.5 | ↓ | -0.5 | 1.3E-05 | 5.6E-03 |
| chr8:145350121-145350963 | 843  | 4.3 | 4.0 | 4.6 | ↓ | -0.7 | 2.3E-04 | 4.7E-02 |
| chr8:145839476-145840541 | 1066 | 4.4 | 4.1 | 4.6 | ↓ | -0.5 | 4.9E-04 | 7.6E-02 |
| chr8:145893404-145894372 | 969  | 5.8 | 5.6 | 6.1 | ↓ | -0.5 | 5.3E-04 | 8.0E-02 |
| chr8:145913523-145916640 | 3118 | 6.9 | 6.8 | 7.1 | ↓ | -0.2 | 1.2E-04 | 2.9E-02 |
| chr8:145992252-145993462 | 1211 | 6.1 | 5.9 | 6.3 | ↓ | -0.3 | 2.9E-04 | 5.5E-02 |
| chr8:146108422-146109183 | 762  | 4.0 | 3.6 | 4.3 | ↓ | -0.7 | 1.4E-05 | 5.9E-03 |
| chr8:146179096-146180471 | 1376 | 5.2 | 4.8 | 5.4 | ↓ | -0.6 | 4.4E-05 | 1.4E-02 |
| chr8:146224623-146226774 | 2152 | 7.1 | 7.0 | 7.2 | ↓ | -0.3 | 1.9E-04 | 4.2E-02 |
| chr8:146583665-146584413 | 749  | 5.6 | 5.4 | 5.8 | ↓ | -0.4 | 1.5E-04 | 3.5E-02 |
| chr8:146647957-146648208 | 252  | 2.5 | 2.9 | 1.9 | ↑ | 1.0  | 7.1E-04 | 9.6E-02 |
| chr8:146736553-146737805 | 1253 | 6.1 | 6.0 | 6.3 | ↓ | -0.3 | 6.7E-04 | 9.1E-02 |
| chr8:146999656-146999980 | 325  | 3.2 | 2.8 | 3.5 | ↓ | -0.7 | 6.3E-04 | 8.9E-02 |
| chr8:147165658-147166035 | 378  | 1.8 | 2.3 | 1.1 | ↑ | 1.2  | 3.5E-04 | 6.2E-02 |
| chr8:147374817-147375606 | 790  | 5.2 | 5.0 | 5.5 | ↓ | -0.5 | 3.3E-07 | 2.9E-04 |
| chr8:147515659-147516162 | 504  | 3.1 | 2.6 | 3.5 | ↓ | -0.9 | 2.5E-05 | 9.3E-03 |
| chr8:147525471-147526073 | 603  | 3.9 | 3.5 | 4.1 | ↓ | -0.6 | 6.3E-04 | 8.9E-02 |
| chr8:147529721-147530224 | 504  | 5.4 | 5.1 | 5.7 | ↓ | -0.5 | 1.3E-05 | 5.5E-03 |
| chr8:147609985-147611006 | 1022 | 4.7 | 4.3 | 5.0 | ↓ | -0.7 | 2.3E-07 | 2.2E-04 |
| chr8:14856759-14857160   | 402  | 2.7 | 3.2 | 2.1 | ↑ | 1.1  | 7.0E-05 | 2.0E-02 |
| chr8:14897080-14898309   | 1230 | 3.8 | 4.1 | 3.3 | ↑ | 0.8  | 7.9E-05 | 2.2E-02 |
| chr8:14935361-14936049   | 689  | 3.7 | 4.0 | 3.4 | ↑ | 0.6  | 4.3E-04 | 6.9E-02 |
| chr8:14957441-14957882   | 442  | 2.6 | 3.0 | 1.8 | ↑ | 1.2  | 4.2E-06 | 2.5E-03 |
| chr8:15000304-15001327   | 1024 | 3.7 | 2.8 | 4.2 | ↓ | -1.4 | 5.9E-13 | 1.5E-09 |
| chr8:15151013-15151279   | 267  | 1.6 | 2.2 | 0.8 | ↑ | 1.3  | 2.7E-04 | 5.1E-02 |
| chr8:15491679-15492244   | 566  | 3.4 | 2.7 | 3.8 | ↓ | -1.1 | 3.6E-08 | 4.2E-05 |
| chr8:15705043-15705426   | 384  | 2.3 | 2.7 | 1.7 | ↑ | 1.1  | 2.6E-04 | 5.0E-02 |
| chr8:16720913-16721360   | 448  | 3.0 | 3.4 | 2.6 | ↑ | 0.8  | 6.4E-04 | 9.0E-02 |
| chr8:16978949-16979261   | 313  | 1.7 | 2.3 | 0.6 | ↑ | 1.7  | 3.3E-05 | 1.1E-02 |
| chr8:1704648-1708306     | 3659 | 6.9 | 6.8 | 7.0 | ↓ | -0.3 | 1.9E-04 | 4.2E-02 |
| chr8:1719411-1720029     | 619  | 4.9 | 4.7 | 5.1 | ↓ | -0.4 | 2.5E-04 | 4.9E-02 |
| chr8:18282626-18283173   | 548  | 4.4 | 3.7 | 4.8 | ↓ | -1.2 | 5.3E-13 | 1.5E-09 |
| chr8:18623267-18625589   | 2323 | 5.8 | 5.2 | 6.2 | ↓ | -0.9 | 5.4E-23 | 3.7E-19 |
| chr8:18686418-18686849   | 432  | 3.6 | 2.8 | 4.2 | ↓ | -1.4 | 1.8E-13 | 6.2E-10 |
| chr8:18824281-18825609   | 1329 | 5.7 | 5.3 | 6.0 | ↓ | -0.7 | 1.1E-10 | 2.3E-07 |
| chr8:18959766-18960622   | 857  | 3.9 | 3.4 | 4.3 | ↓ | -0.9 | 4.6E-07 | 3.8E-04 |

|                        |      |     |     |     |   |      |         |         |
|------------------------|------|-----|-----|-----|---|------|---------|---------|
| chr8:19508693-19509302 | 610  | 3.4 | 3.0 | 3.8 | ↓ | -0.7 | 4.1E-04 | 6.8E-02 |
| chr8:19876072-19876799 | 728  | 3.9 | 3.6 | 4.2 | ↓ | -0.6 | 1.6E-04 | 3.8E-02 |
| chr8:19981541-19981927 | 387  | 2.3 | 1.3 | 2.9 | ↓ | -1.5 | 5.1E-07 | 4.1E-04 |
| chr8:19991181-19992216 | 1036 | 4.4 | 4.7 | 4.0 | ↑ | 0.6  | 3.4E-05 | 1.1E-02 |
| chr8:20364547-20365963 | 1417 | 5.8 | 5.6 | 5.9 | ↓ | -0.3 | 4.4E-04 | 7.1E-02 |
| chr8:20453584-20453909 | 326  | 2.6 | 3.0 | 2.1 | ↑ | 0.9  | 5.9E-04 | 8.7E-02 |
| chr8:20562747-20563292 | 546  | 2.8 | 2.2 | 3.3 | ↓ | -1.0 | 1.0E-04 | 2.6E-02 |
| chr8:20565295-20566122 | 828  | 5.0 | 4.7 | 5.2 | ↓ | -0.5 | 2.6E-04 | 5.1E-02 |
| chr8:20641350-20641691 | 342  | 2.9 | 2.2 | 3.3 | ↓ | -1.1 | 1.1E-05 | 5.1E-03 |
| chr8:21109712-21111424 | 1713 | 5.1 | 4.8 | 5.3 | ↓ | -0.5 | 3.9E-05 | 1.3E-02 |
| chr8:24324018-24325163 | 1146 | 4.9 | 4.0 | 5.5 | ↓ | -1.4 | 1.3E-16 | 5.8E-13 |
| chr8:24367878-24368410 | 533  | 4.2 | 3.6 | 4.7 | ↓ | -1.0 | 1.0E-07 | 1.1E-04 |
| chr8:24436851-24437555 | 705  | 3.4 | 3.0 | 3.8 | ↓ | -0.8 | 3.0E-04 | 5.5E-02 |
| chr8:25263083-25263411 | 329  | 2.4 | 1.7 | 2.9 | ↓ | -1.3 | 4.1E-06 | 2.5E-03 |
| chr8:2670849-2671245   | 397  | 2.1 | 1.4 | 2.6 | ↓ | -1.2 | 8.0E-05 | 2.2E-02 |
| chr8:2679584-2680122   | 539  | 3.4 | 2.9 | 3.8 | ↓ | -0.9 | 1.1E-05 | 5.1E-03 |
| chr8:29313294-29313733 | 440  | 2.6 | 3.0 | 2.0 | ↑ | 1.0  | 4.2E-05 | 1.3E-02 |
| chr8:30013641-30013996 | 356  | 2.0 | 1.3 | 2.5 | ↓ | -1.1 | 3.5E-04 | 6.2E-02 |
| chr8:30133849-30134319 | 471  | 2.8 | 2.2 | 3.2 | ↓ | -1.0 | 9.8E-05 | 2.5E-02 |
| chr8:30210170-30211930 | 1761 | 4.5 | 4.9 | 4.1 | ↑ | 0.8  | 9.2E-09 | 1.2E-05 |
| chr8:30212028-30212595 | 568  | 2.9 | 3.5 | 2.0 | ↑ | 1.5  | 4.9E-07 | 4.0E-04 |
| chr8:30298221-30299050 | 830  | 3.8 | 4.1 | 3.4 | ↑ | 0.7  | 7.2E-04 | 9.6E-02 |
| chr8:30396718-30397005 | 288  | 2.0 | 2.5 | 1.3 | ↑ | 1.2  | 2.0E-04 | 4.3E-02 |
| chr8:3089226-3090464   | 1239 | 5.0 | 4.7 | 5.2 | ↓ | -0.5 | 1.9E-04 | 4.2E-02 |
| chr8:31209799-31210665 | 867  | 3.3 | 3.7 | 2.8 | ↑ | 0.9  | 9.4E-06 | 4.7E-03 |
| chr8:31266730-31267056 | 327  | 2.3 | 1.6 | 2.7 | ↓ | -1.1 | 1.6E-04 | 3.6E-02 |
| chr8:32191722-32192075 | 354  | 2.9 | 2.3 | 3.3 | ↓ | -1.0 | 4.9E-05 | 1.5E-02 |
| chr8:32280484-32280910 | 427  | 1.9 | 2.3 | 1.2 | ↑ | 1.2  | 3.1E-04 | 5.6E-02 |
| chr8:32608394-32608897 | 504  | 3.0 | 3.4 | 2.4 | ↑ | 1.0  | 5.3E-05 | 1.6E-02 |
| chr8:32992466-32992748 | 283  | 1.9 | 2.4 | 1.1 | ↑ | 1.3  | 5.8E-05 | 1.7E-02 |
| chr8:33326083-33327212 | 1130 | 5.2 | 4.6 | 5.6 | ↓ | -1.0 | 3.9E-15 | 1.5E-11 |
| chr8:34112326-34112783 | 458  | 3.2 | 2.6 | 3.6 | ↓ | -1.0 | 5.4E-05 | 1.6E-02 |
| chr8:3538552-3543122   | 4571 | 7.7 | 7.6 | 7.8 | ↓ | -0.2 | 2.4E-05 | 9.0E-03 |
| chr8:36135810-36136163 | 354  | 3.3 | 3.7 | 2.9 | ↑ | 0.7  | 1.6E-04 | 3.6E-02 |
| chr8:3639102-3642367   | 3266 | 7.4 | 7.3 | 7.6 | ↓ | -0.3 | 2.0E-07 | 1.9E-04 |
| chr8:3659088-3660888   | 1801 | 6.0 | 5.8 | 6.2 | ↓ | -0.4 | 3.3E-06 | 2.1E-03 |
| chr8:3691197-3692232   | 1036 | 5.3 | 5.1 | 5.4 | ↓ | -0.4 | 6.5E-04 | 9.0E-02 |
| chr8:3697243-3698522   | 1280 | 4.8 | 4.6 | 5.0 | ↓ | -0.4 | 3.0E-04 | 5.5E-02 |
| chr8:3782532-3785397   | 2866 | 7.1 | 7.0 | 7.2 | ↓ | -0.2 | 6.0E-04 | 8.7E-02 |
| chr8:3842705-3844034   | 1330 | 5.5 | 5.3 | 5.7 | ↓ | -0.3 | 7.2E-04 | 9.6E-02 |
| chr8:39670014-39670469 | 456  | 3.0 | 3.4 | 2.5 | ↑ | 0.8  | 2.4E-04 | 4.9E-02 |
| chr8:3973166-3973645   | 480  | 3.5 | 3.1 | 3.8 | ↓ | -0.7 | 5.1E-04 | 7.7E-02 |
| chr8:39757249-39757647 | 399  | 2.7 | 2.1 | 3.2 | ↓ | -1.0 | 4.6E-05 | 1.5E-02 |
| chr8:3996191-4000594   | 4404 | 7.9 | 7.8 | 8.0 | ↓ | -0.2 | 3.9E-10 | 7.1E-07 |
| chr8:40578382-40579058 | 677  | 3.1 | 2.7 | 3.5 | ↓ | -0.7 | 4.7E-04 | 7.5E-02 |
| chr8:41173602-41174075 | 474  | 2.1 | 2.6 | 1.4 | ↑ | 1.2  | 2.1E-04 | 4.4E-02 |
| chr8:41256424-41257051 | 628  | 2.8 | 2.2 | 3.3 | ↓ | -1.0 | 2.1E-05 | 7.9E-03 |

|                        |      |     |     |     |   |      |         |         |
|------------------------|------|-----|-----|-----|---|------|---------|---------|
| chr8:41327380-41328066 | 687  | 3.5 | 3.8 | 3.1 | ↑ | 0.7  | 4.8E-04 | 7.5E-02 |
| chr8:41606579-41607332 | 754  | 3.1 | 2.7 | 3.5 | ↓ | -0.8 | 3.2E-04 | 5.8E-02 |
| chr8:4210200-4215047   | 4848 | 7.6 | 7.5 | 7.7 | ↓ | -0.2 | 5.0E-06 | 2.8E-03 |
| chr8:42923290-42924231 | 942  | 5.4 | 5.2 | 5.6 | ↓ | -0.3 | 2.2E-04 | 4.7E-02 |
| chr8:43019623-43021251 | 1629 | 4.8 | 5.0 | 4.6 | ↑ | 0.4  | 1.3E-04 | 3.2E-02 |
| chr8:43123743-43124273 | 531  | 4.2 | 3.9 | 4.4 | ↓ | -0.6 | 7.5E-05 | 2.1E-02 |
| chr8:4316855-4319706   | 2852 | 7.0 | 7.2 | 6.7 | ↑ | 0.5  | 2.8E-06 | 1.9E-03 |
| chr8:43918441-43919012 | 572  | 3.0 | 3.4 | 2.3 | ↑ | 1.1  | 5.3E-06 | 2.9E-03 |
| chr8:4488508-4488940   | 433  | 2.1 | 2.6 | 1.5 | ↑ | 1.1  | 5.0E-04 | 7.7E-02 |
| chr8:4501781-4502470   | 690  | 4.2 | 3.8 | 4.5 | ↓ | -0.7 | 1.0E-05 | 5.1E-03 |
| chr8:45026324-45026585 | 262  | 2.0 | 1.4 | 2.5 | ↓ | -1.1 | 6.1E-04 | 8.8E-02 |
| chr8:45891873-45892252 | 380  | 2.4 | 2.9 | 1.8 | ↑ | 1.1  | 3.5E-05 | 1.2E-02 |
| chr8:45983728-45984236 | 509  | 3.1 | 2.5 | 3.5 | ↓ | -0.9 | 2.7E-05 | 9.7E-03 |
| chr8:4628336-4628667   | 332  | 1.9 | 2.3 | 1.2 | ↑ | 1.2  | 4.0E-04 | 6.7E-02 |
| chr8:46484388-46485340 | 953  | 3.8 | 4.0 | 3.4 | ↑ | 0.6  | 6.1E-04 | 8.8E-02 |
| chr8:46868454-46868876 | 423  | 2.1 | 1.3 | 2.7 | ↓ | -1.4 | 6.4E-06 | 3.4E-03 |
| chr8:46892466-46893014 | 549  | 3.3 | 2.8 | 3.6 | ↓ | -0.8 | 1.0E-04 | 2.6E-02 |
| chr8:46905460-46905909 | 450  | 3.5 | 2.8 | 3.9 | ↓ | -1.1 | 3.2E-08 | 3.8E-05 |
| chr8:47029558-47030129 | 572  | 3.7 | 3.0 | 4.2 | ↓ | -1.2 | 4.5E-10 | 7.9E-07 |
| chr8:47042660-47043233 | 574  | 3.2 | 2.7 | 3.6 | ↓ | -0.9 | 3.4E-05 | 1.1E-02 |
| chr8:47101262-47101647 | 386  | 3.3 | 2.7 | 3.8 | ↓ | -1.0 | 2.6E-05 | 9.3E-03 |
| chr8:47150063-47150331 | 269  | 1.8 | 1.0 | 2.3 | ↓ | -1.2 | 4.2E-04 | 6.9E-02 |
| chr8:47757855-47758562 | 708  | 4.2 | 3.9 | 4.5 | ↓ | -0.6 | 5.1E-05 | 1.6E-02 |
| chr8:47764464-47765437 | 974  | 4.2 | 3.9 | 4.5 | ↓ | -0.6 | 2.4E-04 | 4.8E-02 |
| chr8:49338684-49338946 | 263  | 1.8 | 2.3 | 1.1 | ↑ | 1.2  | 5.2E-04 | 7.8E-02 |
| chr8:49983100-49983451 | 352  | 3.3 | 3.6 | 2.9 | ↑ | 0.7  | 7.2E-04 | 9.6E-02 |
| chr8:50105873-50106318 | 446  | 3.8 | 3.3 | 4.2 | ↓ | -0.9 | 1.9E-05 | 7.5E-03 |
| chr8:51108776-51109301 | 526  | 2.3 | 2.7 | 1.8 | ↑ | 0.9  | 7.5E-04 | 9.9E-02 |
| chr8:5190454-5191366   | 913  | 5.4 | 5.2 | 5.5 | ↓ | -0.4 | 2.1E-04 | 4.5E-02 |
| chr8:5227897-5228695   | 799  | 3.5 | 3.1 | 3.9 | ↓ | -0.8 | 1.2E-04 | 3.1E-02 |
| chr8:5731823-5733428   | 1606 | 5.5 | 5.2 | 5.7 | ↓ | -0.5 | 3.0E-08 | 3.8E-05 |
| chr8:5733577-5734073   | 497  | 4.8 | 4.4 | 5.0 | ↓ | -0.6 | 1.5E-05 | 5.9E-03 |
| chr8:57629573-57630056 | 484  | 2.7 | 2.1 | 3.2 | ↓ | -1.0 | 5.0E-05 | 1.5E-02 |
| chr8:58425419-58425875 | 457  | 3.0 | 2.3 | 3.4 | ↓ | -1.1 | 4.4E-06 | 2.6E-03 |
| chr8:58467652-58468082 | 431  | 4.3 | 4.0 | 4.5 | ↓ | -0.6 | 2.6E-04 | 5.0E-02 |
| chr8:589346-591516     | 2171 | 7.0 | 6.8 | 7.1 | ↓ | -0.3 | 8.2E-08 | 9.0E-05 |
| chr8:6064158-6069229   | 5072 | 7.4 | 7.3 | 7.5 | ↓ | -0.2 | 3.6E-05 | 1.2E-02 |
| chr8:61269470-61269890 | 421  | 2.6 | 3.0 | 2.1 | ↑ | 1.0  | 4.0E-04 | 6.7E-02 |
| chr8:6243925-6244520   | 596  | 3.3 | 2.9 | 3.7 | ↓ | -0.8 | 2.4E-04 | 4.9E-02 |
| chr8:6273966-6274350   | 385  | 2.9 | 2.4 | 3.2 | ↓ | -0.8 | 7.6E-04 | 9.9E-02 |
| chr8:63947843-63948434 | 592  | 4.0 | 3.5 | 4.3 | ↓ | -0.8 | 1.4E-05 | 5.9E-03 |
| chr8:71029609-71030067 | 459  | 3.0 | 2.5 | 3.4 | ↓ | -0.8 | 2.3E-04 | 4.7E-02 |
| chr8:71440855-71441232 | 378  | 2.2 | 1.6 | 2.7 | ↓ | -1.1 | 2.4E-04 | 4.9E-02 |
| chr8:72672745-72673132 | 388  | 2.8 | 2.3 | 3.2 | ↓ | -0.8 | 4.2E-04 | 6.9E-02 |
| chr8:74074955-74077166 | 2212 | 5.2 | 5.0 | 5.4 | ↓ | -0.4 | 2.6E-04 | 5.0E-02 |
| chr8:74185051-74187103 | 2053 | 4.9 | 4.3 | 5.3 | ↓ | -1.0 | 8.4E-09 | 1.2E-05 |
| chr8:74187894-74188430 | 537  | 2.7 | 2.2 | 3.2 | ↓ | -1.0 | 2.8E-04 | 5.4E-02 |

|                          |      |     |     |     |   |      |         |         |
|--------------------------|------|-----|-----|-----|---|------|---------|---------|
| chr8:74763092-74764007   | 916  | 4.6 | 4.3 | 4.9 | ↓ | -0.6 | 4.8E-06 | 2.7E-03 |
| chr8:74845483-74846302   | 820  | 5.2 | 5.0 | 5.3 | ↓ | -0.3 | 7.3E-04 | 9.7E-02 |
| chr8:76067420-76067786   | 367  | 2.2 | 2.6 | 1.5 | ↑ | 1.1  | 4.5E-04 | 7.1E-02 |
| chr8:76203474-76203971   | 498  | 5.2 | 5.0 | 5.5 | ↓ | -0.5 | 1.4E-05 | 5.9E-03 |
| chr8:76429240-76430144   | 905  | 4.8 | 4.4 | 5.1 | ↓ | -0.7 | 4.4E-06 | 2.6E-03 |
| chr8:76476405-76477406   | 1002 | 4.3 | 4.0 | 4.6 | ↓ | -0.6 | 6.6E-04 | 9.0E-02 |
| chr8:76749135-76749509   | 375  | 3.2 | 2.7 | 3.5 | ↓ | -0.8 | 3.9E-04 | 6.6E-02 |
| chr8:77989215-77989825   | 611  | 2.5 | 2.9 | 1.9 | ↑ | 1.0  | 2.5E-04 | 4.9E-02 |
| chr8:79148367-79150010   | 1644 | 6.2 | 6.0 | 6.4 | ↓ | -0.4 | 3.7E-04 | 6.4E-02 |
| chr8:80471297-80471974   | 678  | 3.5 | 3.8 | 3.1 | ↑ | 0.8  | 6.5E-04 | 9.0E-02 |
| chr8:80674992-80676280   | 1289 | 5.9 | 6.1 | 5.6 | ↑ | 0.6  | 1.5E-09 | 2.4E-06 |
| chr8:80715855-80716413   | 559  | 2.9 | 2.2 | 3.3 | ↓ | -1.1 | 1.4E-06 | 9.4E-04 |
| chr8:80953615-80954052   | 438  | 2.6 | 3.1 | 2.0 | ↑ | 1.0  | 1.0E-04 | 2.6E-02 |
| chr8:81250151-81251101   | 951  | 5.6 | 5.3 | 5.8 | ↓ | -0.5 | 1.3E-04 | 3.2E-02 |
| chr8:81512509-81512925   | 417  | 2.6 | 2.0 | 3.0 | ↓ | -0.9 | 3.0E-04 | 5.5E-02 |
| chr8:81575613-81576076   | 464  | 3.1 | 2.6 | 3.5 | ↓ | -0.9 | 9.4E-05 | 2.5E-02 |
| chr8:82713459-82714640   | 1182 | 5.0 | 5.2 | 4.8 | ↑ | 0.4  | 2.3E-04 | 4.7E-02 |
| chr8:83721003-83721707   | 705  | 3.6 | 3.2 | 3.9 | ↓ | -0.7 | 2.1E-05 | 7.9E-03 |
| chr8:8386735-8387086     | 352  | 2.3 | 1.5 | 2.8 | ↓ | -1.2 | 2.3E-05 | 8.5E-03 |
| chr8:839342-839862       | 521  | 3.7 | 3.3 | 4.0 | ↓ | -0.7 | 9.6E-05 | 2.5E-02 |
| chr8:84166933-84167283   | 351  | 1.9 | 1.2 | 2.3 | ↓ | -1.2 | 4.9E-04 | 7.6E-02 |
| chr8:84610007-84610379   | 373  | 2.1 | 1.4 | 2.5 | ↓ | -1.1 | 3.0E-04 | 5.6E-02 |
| chr8:84614775-84615638   | 864  | 4.7 | 4.2 | 5.0 | ↓ | -0.8 | 8.7E-07 | 6.2E-04 |
| chr8:85977966-85978783   | 818  | 4.2 | 4.5 | 3.8 | ↑ | 0.7  | 3.0E-04 | 5.5E-02 |
| chr8:88046611-88046864   | 254  | 2.3 | 2.7 | 1.6 | ↑ | 1.1  | 7.7E-04 | 1.0E-01 |
| chr8:89042585-89043457   | 873  | 3.7 | 4.0 | 3.3 | ↑ | 0.7  | 2.0E-04 | 4.4E-02 |
| chr8:89045592-89046322   | 731  | 3.5 | 4.0 | 2.7 | ↑ | 1.3  | 6.9E-10 | 1.1E-06 |
| chr8:89051137-89051560   | 424  | 2.2 | 2.7 | 1.2 | ↑ | 1.5  | 8.3E-07 | 6.0E-04 |
| chr8:89250884-89251338   | 455  | 3.7 | 3.4 | 4.0 | ↓ | -0.6 | 7.6E-04 | 9.9E-02 |
| chr8:90727014-90727612   | 599  | 3.1 | 2.6 | 3.5 | ↓ | -0.9 | 5.2E-05 | 1.6E-02 |
| chr8:90731548-90732885   | 1338 | 4.8 | 4.5 | 5.1 | ↓ | -0.7 | 4.6E-07 | 3.8E-04 |
| chr8:90734620-90734954   | 335  | 1.7 | 0.7 | 2.3 | ↓ | -1.6 | 3.2E-05 | 1.1E-02 |
| chr8:9123971-9124212     | 242  | 1.7 | 1.0 | 2.2 | ↓ | -1.3 | 3.1E-04 | 5.7E-02 |
| chr8:91561882-91562169   | 288  | 2.0 | 1.3 | 2.4 | ↓ | -1.1 | 4.3E-04 | 6.9E-02 |
| chr8:91568270-91569152   | 883  | 4.7 | 4.5 | 4.9 | ↓ | -0.4 | 6.3E-04 | 8.9E-02 |
| chr8:92150437-92150826   | 390  | 3.0 | 2.6 | 3.4 | ↓ | -0.7 | 6.6E-04 | 9.0E-02 |
| chr8:94480021-94480434   | 414  | 2.5 | 1.9 | 2.8 | ↓ | -0.9 | 4.6E-04 | 7.3E-02 |
| chr8:96672474-96673171   | 698  | 3.7 | 3.2 | 4.0 | ↓ | -0.8 | 4.7E-06 | 2.7E-03 |
| chr8:99687695-99687992   | 298  | 2.4 | 1.9 | 2.8 | ↓ | -1.0 | 3.6E-04 | 6.2E-02 |
| chr9:100486949-100487741 | 793  | 4.6 | 5.0 | 4.2 | ↑ | 0.8  | 1.6E-04 | 3.9E-02 |
| chr9:10056530-10057826   | 1297 | 5.5 | 5.7 | 5.3 | ↑ | 0.4  | 2.1E-05 | 9.1E-03 |
| chr9:100856901-100857701 | 801  | 3.7 | 3.3 | 4.1 | ↓ | -0.8 | 2.3E-06 | 1.6E-03 |
| chr9:101097706-101097917 | 212  | 1.6 | 0.8 | 2.1 | ↓ | -1.2 | 5.0E-04 | 8.3E-02 |
| chr9:103307732-103308342 | 611  | 3.2 | 3.7 | 2.5 | ↑ | 1.2  | 1.3E-06 | 1.0E-03 |
| chr9:103309919-103310213 | 295  | 2.4 | 3.1 | 0.9 | ↑ | 2.2  | 4.9E-12 | 2.1E-08 |
| chr9:105205792-105206022 | 231  | 1.9 | 1.1 | 2.4 | ↓ | -1.2 | 2.7E-04 | 5.6E-02 |
| chr9:10812000-10812720   | 721  | 4.6 | 4.2 | 4.8 | ↓ | -0.6 | 9.3E-06 | 5.1E-03 |

|                          |      |     |     |     |   |      |         |         |
|--------------------------|------|-----|-----|-----|---|------|---------|---------|
| chr9:10875864-10879129   | 3266 | 7.4 | 7.3 | 7.5 | ↓ | -0.2 | 6.4E-04 | 9.6E-02 |
| chr9:109110642-109110969 | 328  | 1.6 | 0.5 | 2.2 | ↓ | -1.7 | 7.8E-06 | 4.5E-03 |
| chr9:109111466-109111864 | 399  | 2.4 | 1.8 | 2.9 | ↓ | -1.1 | 1.6E-04 | 3.9E-02 |
| chr9:11034514-11034865   | 352  | 3.0 | 2.5 | 3.4 | ↓ | -0.9 | 3.9E-05 | 1.4E-02 |
| chr9:11174675-11175141   | 467  | 3.2 | 2.5 | 3.6 | ↓ | -1.2 | 4.6E-08 | 6.7E-05 |
| chr9:112491586-112491888 | 303  | 2.5 | 2.9 | 1.9 | ↑ | 1.0  | 3.3E-04 | 6.3E-02 |
| chr9:113109596-113110370 | 775  | 5.3 | 5.1 | 5.6 | ↓ | -0.5 | 9.5E-07 | 7.7E-04 |
| chr9:11361059-11361548   | 490  | 3.8 | 4.1 | 3.5 | ↑ | 0.6  | 2.7E-04 | 5.5E-02 |
| chr9:114112258-114112785 | 528  | 4.0 | 4.2 | 3.7 | ↑ | 0.6  | 2.3E-04 | 4.9E-02 |
| chr9:114595528-114596235 | 708  | 5.0 | 4.6 | 5.3 | ↓ | -0.7 | 1.4E-06 | 1.0E-03 |
| chr9:114599053-114599447 | 395  | 3.2 | 2.8 | 3.5 | ↓ | -0.7 | 6.7E-04 | 9.8E-02 |
| chr9:11461154-11461621   | 468  | 3.0 | 3.3 | 2.4 | ↑ | 0.9  | 8.8E-05 | 2.5E-02 |
| chr9:11473495-11474148   | 654  | 3.4 | 2.9 | 3.8 | ↓ | -0.9 | 2.3E-05 | 9.8E-03 |
| chr9:116320889-116321286 | 398  | 4.5 | 4.8 | 4.2 | ↑ | 0.5  | 3.9E-05 | 1.4E-02 |
| chr9:116807573-116807898 | 326  | 3.1 | 2.7 | 3.5 | ↓ | -0.8 | 4.5E-04 | 7.8E-02 |
| chr9:11841433-11842899   | 1467 | 5.3 | 5.5 | 5.0 | ↑ | 0.5  | 8.9E-05 | 2.5E-02 |
| chr9:118449048-118449557 | 510  | 4.1 | 3.8 | 4.4 | ↓ | -0.6 | 6.7E-04 | 9.8E-02 |
| chr9:118963238-118963677 | 440  | 4.2 | 3.8 | 4.5 | ↓ | -0.7 | 1.2E-05 | 5.9E-03 |
| chr9:120343085-120343899 | 815  | 3.7 | 3.3 | 4.1 | ↓ | -0.8 | 1.2E-05 | 5.9E-03 |
| chr9:120903364-120903847 | 484  | 4.1 | 3.8 | 4.4 | ↓ | -0.6 | 1.6E-04 | 3.9E-02 |
| chr9:12355027-12355621   | 595  | 2.6 | 3.0 | 2.0 | ↑ | 1.0  | 2.6E-04 | 5.5E-02 |
| chr9:124209-126598       | 2390 | 7.3 | 7.4 | 7.2 | ↑ | 0.2  | 2.3E-04 | 5.0E-02 |
| chr9:125211980-125212281 | 302  | 3.0 | 2.4 | 3.4 | ↓ | -1.0 | 4.0E-05 | 1.5E-02 |
| chr9:125600715-125600956 | 242  | 1.8 | 2.3 | 1.1 | ↑ | 1.2  | 5.7E-04 | 9.0E-02 |
| chr9:125775864-125776139 | 276  | 2.9 | 2.3 | 3.3 | ↓ | -1.0 | 2.1E-04 | 4.8E-02 |
| chr9:126103102-126103429 | 328  | 2.8 | 2.0 | 3.3 | ↓ | -1.3 | 2.5E-07 | 2.5E-04 |
| chr9:126105203-126105786 | 584  | 2.9 | 2.0 | 3.4 | ↓ | -1.4 | 7.6E-09 | 1.4E-05 |
| chr9:126313750-126314171 | 422  | 2.9 | 2.2 | 3.4 | ↓ | -1.2 | 9.7E-07 | 7.8E-04 |
| chr9:12759646-12760025   | 380  | 2.6 | 3.0 | 1.8 | ↑ | 1.2  | 9.2E-06 | 5.1E-03 |
| chr9:128047631-128047957 | 327  | 2.0 | 2.4 | 1.4 | ↑ | 1.1  | 6.5E-04 | 9.7E-02 |
| chr9:129013888-129014350 | 463  | 3.1 | 3.5 | 2.6 | ↑ | 0.9  | 3.5E-05 | 1.3E-02 |
| chr9:129107073-129107720 | 648  | 3.4 | 2.9 | 3.7 | ↓ | -0.8 | 6.6E-05 | 2.1E-02 |
| chr9:129256678-129257540 | 863  | 3.7 | 3.3 | 4.0 | ↓ | -0.8 | 2.4E-04 | 5.0E-02 |
| chr9:130036665-130036969 | 305  | 2.1 | 2.5 | 1.4 | ↑ | 1.1  | 5.7E-04 | 9.0E-02 |
| chr9:130093430-130093983 | 554  | 2.9 | 2.1 | 3.4 | ↓ | -1.4 | 1.3E-08 | 2.2E-05 |
| chr9:130149712-130150543 | 832  | 4.0 | 4.3 | 3.7 | ↑ | 0.6  | 4.4E-04 | 7.6E-02 |
| chr9:131503834-131504236 | 403  | 2.7 | 3.0 | 2.2 | ↑ | 0.9  | 5.2E-04 | 8.7E-02 |
| chr9:131983308-131983782 | 475  | 2.6 | 3.0 | 1.9 | ↑ | 1.1  | 3.6E-05 | 1.4E-02 |
| chr9:132534810-132535437 | 628  | 3.4 | 2.7 | 3.9 | ↓ | -1.1 | 4.7E-06 | 2.9E-03 |
| chr9:132688604-132688913 | 310  | 2.6 | 2.0 | 3.1 | ↓ | -1.0 | 2.2E-04 | 4.8E-02 |
| chr9:132692603-132693956 | 1354 | 4.5 | 4.1 | 4.8 | ↓ | -0.7 | 1.2E-05 | 6.1E-03 |
| chr9:132735199-132735538 | 340  | 2.8 | 2.2 | 3.2 | ↓ | -1.0 | 3.0E-05 | 1.2E-02 |
| chr9:132851266-132851616 | 351  | 3.3 | 2.8 | 3.7 | ↓ | -0.8 | 3.3E-04 | 6.4E-02 |
| chr9:133594768-133595121 | 354  | 3.0 | 2.4 | 3.3 | ↓ | -0.9 | 1.9E-04 | 4.5E-02 |
| chr9:134014803-134016931 | 2129 | 6.0 | 6.2 | 5.8 | ↑ | 0.4  | 6.1E-04 | 9.3E-02 |
| chr9:135106522-135107121 | 600  | 5.0 | 4.7 | 5.3 | ↓ | -0.6 | 1.4E-07 | 1.4E-04 |
| chr9:13545282-13545891   | 610  | 5.5 | 5.6 | 5.3 | ↑ | 0.3  | 2.1E-04 | 4.8E-02 |



|                          |      |     |     |     |   |      |         |         |
|--------------------------|------|-----|-----|-----|---|------|---------|---------|
| chr9:135470364-135471380 | 1017 | 5.3 | 5.5 | 5.1 | ↑ | 0.4  | 4.3E-04 | 7.5E-02 |
| chr9:135707852-135708368 | 517  | 3.0 | 2.5 | 3.4 | ↓ | -0.8 | 4.1E-04 | 7.3E-02 |
| chr9:135900144-135900816 | 673  | 3.0 | 3.4 | 2.4 | ↑ | 1.0  | 4.4E-05 | 1.5E-02 |
| chr9:136565395-136566500 | 1106 | 4.8 | 4.6 | 5.1 | ↓ | -0.5 | 6.5E-06 | 3.9E-03 |
| chr9:137339333-137340055 | 723  | 3.1 | 2.5 | 3.6 | ↓ | -1.0 | 3.1E-05 | 1.2E-02 |
| chr9:137478568-137478917 | 350  | 2.8 | 2.1 | 3.2 | ↓ | -1.1 | 1.1E-05 | 5.7E-03 |
| chr9:137767130-137767661 | 532  | 3.6 | 3.3 | 3.9 | ↓ | -0.7 | 3.4E-04 | 6.5E-02 |
| chr9:139011948-139012215 | 268  | 1.7 | 2.2 | 0.9 | ↑ | 1.3  | 2.2E-04 | 4.8E-02 |
| chr9:140419845-140420164 | 320  | 1.8 | 0.9 | 2.4 | ↓ | -1.5 | 2.0E-05 | 9.0E-03 |
| chr9:141992617-141993116 | 500  | 2.6 | 2.0 | 3.0 | ↓ | -0.9 | 2.8E-04 | 5.7E-02 |
| chr9:142133565-142134617 | 1053 | 5.2 | 5.4 | 4.9 | ↑ | 0.4  | 9.6E-05 | 2.6E-02 |
| chr9:142134644-142135375 | 732  | 3.6 | 3.9 | 3.3 | ↑ | 0.6  | 2.2E-04 | 4.8E-02 |
| chr9:142174373-142175405 | 1033 | 4.8 | 5.0 | 4.5 | ↑ | 0.4  | 3.7E-04 | 6.9E-02 |
| chr9:142192634-142193911 | 1278 | 6.3 | 6.1 | 6.4 | ↓ | -0.3 | 1.9E-04 | 4.5E-02 |
| chr9:142684952-142685346 | 395  | 3.7 | 4.1 | 3.2 | ↑ | 0.9  | 1.1E-06 | 8.3E-04 |
| chr9:142744007-142745781 | 1775 | 5.5 | 5.3 | 5.6 | ↓ | -0.3 | 4.1E-04 | 7.4E-02 |
| chr9:143436746-143437353 | 608  | 3.5 | 2.8 | 3.9 | ↓ | -1.1 | 2.6E-08 | 4.0E-05 |
| chr9:143443056-143444069 | 1014 | 4.7 | 4.4 | 4.9 | ↓ | -0.5 | 3.2E-04 | 6.2E-02 |
| chr9:144309460-144309971 | 512  | 3.2 | 3.5 | 2.8 | ↑ | 0.7  | 3.1E-04 | 6.0E-02 |
| chr9:14532642-14534357   | 1716 | 5.7 | 5.5 | 5.9 | ↓ | -0.4 | 5.6E-05 | 1.8E-02 |
| chr9:145479464-145482140 | 2677 | 5.9 | 5.7 | 6.1 | ↓ | -0.3 | 1.2E-04 | 3.1E-02 |
| chr9:145631431-145631888 | 458  | 2.6 | 3.0 | 2.1 | ↑ | 0.9  | 6.7E-04 | 9.8E-02 |
| chr9:145727669-145731599 | 3931 | 7.3 | 7.4 | 7.2 | ↑ | 0.2  | 6.9E-05 | 2.1E-02 |
| chr9:145731732-145732262 | 531  | 3.8 | 3.5 | 4.1 | ↓ | -0.7 | 2.1E-04 | 4.7E-02 |
| chr9:146403053-146403663 | 611  | 4.2 | 3.9 | 4.5 | ↓ | -0.6 | 2.5E-05 | 1.0E-02 |
| chr9:146458753-146460090 | 1338 | 5.7 | 5.5 | 5.9 | ↓ | -0.4 | 1.0E-04 | 2.7E-02 |
| chr9:146516962-146517914 | 953  | 4.3 | 4.0 | 4.6 | ↓ | -0.6 | 9.6E-06 | 5.1E-03 |
| chr9:146530722-146531949 | 1228 | 6.0 | 5.8 | 6.2 | ↓ | -0.4 | 8.6E-07 | 7.4E-04 |
| chr9:146917268-146918204 | 937  | 4.4 | 3.9 | 4.7 | ↓ | -0.9 | 7.9E-07 | 7.0E-04 |
| chr9:146998817-146999425 | 609  | 5.3 | 4.8 | 5.6 | ↓ | -0.8 | 9.2E-11 | 2.7E-07 |
| chr9:147043471-147044129 | 659  | 4.7 | 4.3 | 5.0 | ↓ | -0.6 | 1.2E-07 | 1.3E-04 |
| chr9:147583089-147583922 | 834  | 3.4 | 3.1 | 3.7 | ↓ | -0.7 | 4.7E-04 | 8.0E-02 |
| chr9:147660997-147661794 | 798  | 3.8 | 3.2 | 4.3 | ↓ | -1.1 | 2.1E-11 | 7.1E-08 |
| chr9:147754715-147756421 | 1707 | 6.2 | 6.0 | 6.4 | ↓ | -0.4 | 6.8E-10 | 1.8E-06 |
| chr9:148348505-148352900 | 4396 | 7.6 | 7.7 | 7.5 | ↑ | 0.2  | 7.1E-04 | 1.0E-01 |
| chr9:148356070-148356550 | 481  | 2.9 | 2.3 | 3.3 | ↓ | -1.0 | 8.7E-05 | 2.5E-02 |
| chr9:148524629-148525679 | 1051 | 4.6 | 4.2 | 4.8 | ↓ | -0.6 | 5.3E-04 | 8.7E-02 |
| chr9:14861852-14862547   | 696  | 3.8 | 3.4 | 4.1 | ↓ | -0.8 | 1.6E-04 | 3.9E-02 |
| chr9:148813315-148814930 | 1616 | 7.1 | 7.0 | 7.2 | ↓ | -0.2 | 2.4E-04 | 5.0E-02 |
| chr9:148833903-148834497 | 595  | 4.8 | 4.3 | 5.2 | ↓ | -0.9 | 2.2E-07 | 2.2E-04 |
| chr9:148895413-148896162 | 750  | 3.8 | 3.4 | 4.1 | ↓ | -0.7 | 3.0E-04 | 5.9E-02 |
| chr9:149047272-149048639 | 1368 | 5.5 | 5.3 | 5.7 | ↓ | -0.4 | 4.2E-06 | 2.6E-03 |
| chr9:14994679-14995172   | 494  | 3.0 | 2.5 | 3.4 | ↓ | -0.9 | 4.5E-05 | 1.5E-02 |
| chr9:15060453-15061080   | 628  | 4.0 | 3.6 | 4.3 | ↓ | -0.7 | 1.4E-05 | 6.6E-03 |
| chr9:150745707-150747361 | 1655 | 6.7 | 6.6 | 6.8 | ↓ | -0.3 | 2.5E-05 | 1.0E-02 |
| chr9:151691278-151692278 | 1001 | 4.8 | 4.5 | 5.0 | ↓ | -0.5 | 3.7E-05 | 1.4E-02 |
| chr9:151739667-151740572 | 906  | 5.1 | 4.9 | 5.3 | ↓ | -0.4 | 3.7E-04 | 6.8E-02 |

|                          |      |     |     |     |   |      |         |         |
|--------------------------|------|-----|-----|-----|---|------|---------|---------|
| chr9:152225567-152226295 | 729  | 4.0 | 3.2 | 4.4 | ↓ | -1.2 | 3.2E-11 | 1.0E-07 |
| chr9:152249044-152249460 | 417  | 3.0 | 2.4 | 3.4 | ↓ | -1.0 | 1.9E-05 | 8.5E-03 |
| chr9:152434878-152435527 | 650  | 3.8 | 3.4 | 4.1 | ↓ | -0.8 | 2.1E-05 | 9.1E-03 |
| chr9:152537962-152538252 | 291  | 3.3 | 2.9 | 3.7 | ↓ | -0.8 | 5.4E-04 | 8.8E-02 |
| chr9:1526088-1527353     | 1266 | 6.2 | 6.0 | 6.3 | ↓ | -0.2 | 4.9E-04 | 8.3E-02 |
| chr9:152789539-152790470 | 932  | 4.4 | 4.0 | 4.7 | ↓ | -0.8 | 4.4E-05 | 1.5E-02 |
| chr9:152806671-152808118 | 1448 | 5.4 | 5.1 | 5.6 | ↓ | -0.4 | 1.0E-04 | 2.8E-02 |
| chr9:152893408-152894089 | 682  | 4.4 | 4.1 | 4.7 | ↓ | -0.6 | 1.3E-04 | 3.3E-02 |
| chr9:153163153-153164107 | 955  | 4.9 | 4.6 | 5.1 | ↓ | -0.4 | 3.9E-04 | 7.1E-02 |
| chr9:153374678-153376217 | 1540 | 5.2 | 5.4 | 5.0 | ↑ | 0.4  | 2.7E-04 | 5.5E-02 |
| chr9:153607483-153607811 | 329  | 2.4 | 1.3 | 3.0 | ↓ | -1.6 | 5.7E-08 | 7.8E-05 |
| chr9:153611282-153611815 | 534  | 2.8 | 3.2 | 2.2 | ↑ | 1.0  | 1.6E-05 | 7.6E-03 |
| chr9:18030571-18030941   | 371  | 2.2 | 1.6 | 2.6 | ↓ | -1.0 | 4.6E-04 | 7.9E-02 |
| chr9:19496382-19497331   | 950  | 5.3 | 4.9 | 5.5 | ↓ | -0.6 | 6.7E-05 | 2.1E-02 |
| chr9:22527755-22528222   | 468  | 3.8 | 3.4 | 4.1 | ↓ | -0.7 | 2.3E-04 | 5.0E-02 |
| chr9:22652955-22653362   | 408  | 4.0 | 3.4 | 4.3 | ↓ | -0.9 | 7.8E-05 | 2.3E-02 |
| chr9:22904399-22905165   | 767  | 3.5 | 3.1 | 3.9 | ↓ | -0.7 | 6.2E-05 | 2.0E-02 |
| chr9:22992892-22994108   | 1217 | 6.6 | 6.2 | 6.8 | ↓ | -0.6 | 2.2E-08 | 3.5E-05 |
| chr9:24333949-24334495   | 547  | 3.7 | 3.3 | 4.1 | ↓ | -0.8 | 9.1E-05 | 2.5E-02 |
| chr9:25400379-25401788   | 1410 | 4.8 | 4.3 | 5.2 | ↓ | -0.9 | 6.8E-08 | 8.8E-05 |
| chr9:25463835-25464782   | 948  | 5.2 | 5.0 | 5.3 | ↓ | -0.4 | 2.1E-04 | 4.8E-02 |
| chr9:25766042-25766326   | 285  | 2.3 | 1.4 | 2.8 | ↓ | -1.4 | 8.7E-07 | 7.4E-04 |
| chr9:26014084-26014319   | 236  | 1.8 | 2.3 | 1.0 | ↑ | 1.3  | 2.4E-04 | 5.1E-02 |
| chr9:2622084-2622916     | 833  | 4.3 | 3.8 | 4.7 | ↓ | -0.9 | 7.9E-08 | 9.7E-05 |
| chr9:27425943-27426382   | 440  | 3.2 | 2.8 | 3.5 | ↓ | -0.7 | 4.8E-04 | 8.2E-02 |
| chr9:27534024-27534364   | 341  | 1.9 | 2.4 | 1.1 | ↑ | 1.4  | 7.2E-05 | 2.2E-02 |
| chr9:2770382-2771105     | 724  | 3.9 | 3.6 | 4.2 | ↓ | -0.6 | 3.2E-04 | 6.2E-02 |
| chr9:28636255-28637648   | 1394 | 5.5 | 5.7 | 5.3 | ↑ | 0.3  | 5.5E-04 | 8.8E-02 |
| chr9:2887846-2888363     | 518  | 4.2 | 3.7 | 4.5 | ↓ | -0.8 | 7.6E-08 | 9.6E-05 |
| chr9:29513207-29513785   | 579  | 4.6 | 4.3 | 4.8 | ↓ | -0.5 | 1.3E-04 | 3.3E-02 |
| chr9:29708233-29710351   | 2119 | 5.7 | 5.5 | 5.8 | ↓ | -0.3 | 6.7E-04 | 9.8E-02 |
| chr9:2978680-2979657     | 978  | 4.5 | 4.0 | 4.9 | ↓ | -0.9 | 1.5E-09 | 3.5E-06 |
| chr9:30333654-30334926   | 1273 | 5.1 | 5.3 | 4.9 | ↑ | 0.4  | 3.2E-05 | 1.2E-02 |
| chr9:30574794-30575019   | 226  | 2.0 | 1.3 | 2.4 | ↓ | -1.1 | 7.0E-04 | 9.9E-02 |
| chr9:31030878-31031262   | 385  | 2.7 | 2.0 | 3.2 | ↓ | -1.2 | 3.2E-06 | 2.1E-03 |
| chr9:31387104-31387885   | 782  | 5.1 | 5.0 | 5.3 | ↓ | -0.4 | 5.5E-04 | 8.8E-02 |
| chr9:31711550-31711928   | 379  | 2.3 | 2.7 | 1.7 | ↑ | 1.0  | 3.8E-04 | 6.9E-02 |
| chr9:32686510-32686895   | 386  | 3.7 | 2.8 | 4.2 | ↓ | -1.5 | 2.1E-12 | 1.2E-08 |
| chr9:35688465-35689946   | 1482 | 4.9 | 4.6 | 5.2 | ↓ | -0.6 | 4.5E-06 | 2.8E-03 |
| chr9:36304904-36305530   | 627  | 3.5 | 3.1 | 3.8 | ↓ | -0.7 | 8.6E-05 | 2.5E-02 |
| chr9:36361386-36361658   | 273  | 2.4 | 1.6 | 2.9 | ↓ | -1.3 | 4.3E-05 | 1.5E-02 |
| chr9:36574603-36575011   | 409  | 2.3 | 1.6 | 2.8 | ↓ | -1.2 | 7.0E-05 | 2.1E-02 |
| chr9:36577840-36578438   | 599  | 3.3 | 2.5 | 3.8 | ↓ | -1.3 | 4.4E-09 | 8.5E-06 |
| chr9:36579162-36579667   | 506  | 3.9 | 3.4 | 4.3 | ↓ | -0.9 | 3.4E-07 | 3.3E-04 |
| chr9:36703516-36703904   | 389  | 3.9 | 3.4 | 4.2 | ↓ | -0.8 | 9.5E-06 | 5.1E-03 |
| chr9:37236185-37237227   | 1043 | 4.6 | 4.3 | 4.9 | ↓ | -0.6 | 4.1E-05 | 1.5E-02 |
| chr9:37240739-37241615   | 877  | 4.5 | 4.2 | 4.7 | ↓ | -0.5 | 6.0E-04 | 9.3E-02 |

|                        |      |     |     |     |   |      |         |         |
|------------------------|------|-----|-----|-----|---|------|---------|---------|
| chr9:37482204-37483480 | 1277 | 3.7 | 3.3 | 4.1 | ↓ | -0.9 | 3.7E-04 | 6.9E-02 |
| chr9:386209-390281     | 4073 | 8.5 | 8.4 | 8.6 | ↓ | -0.2 | 8.7E-06 | 4.9E-03 |
| chr9:38691625-38692018 | 394  | 3.3 | 2.5 | 3.8 | ↓ | -1.3 | 3.8E-09 | 8.1E-06 |
| chr9:38836368-38837203 | 836  | 4.2 | 3.6 | 4.6 | ↓ | -1.0 | 8.8E-08 | 1.0E-04 |
| chr9:41134619-41135120 | 502  | 3.2 | 2.7 | 3.5 | ↓ | -0.8 | 7.0E-04 | 9.9E-02 |
| chr9:42361564-42361938 | 375  | 2.3 | 1.7 | 2.7 | ↓ | -1.0 | 4.7E-04 | 8.0E-02 |
| chr9:44484700-44485147 | 448  | 4.7 | 4.5 | 4.9 | ↓ | -0.4 | 6.8E-04 | 9.8E-02 |
| chr9:45429924-45430251 | 328  | 2.2 | 2.6 | 1.6 | ↑ | 1.0  | 6.3E-04 | 9.6E-02 |
| chr9:45741323-45741841 | 519  | 3.3 | 2.8 | 3.6 | ↓ | -0.8 | 6.7E-05 | 2.1E-02 |
| chr9:45814830-45815651 | 822  | 5.2 | 5.0 | 5.4 | ↓ | -0.4 | 1.3E-04 | 3.3E-02 |
| chr9:45835189-45835663 | 475  | 3.8 | 3.4 | 4.1 | ↓ | -0.7 | 3.5E-04 | 6.5E-02 |
| chr9:45886501-45887944 | 1444 | 5.7 | 5.5 | 5.9 | ↓ | -0.4 | 1.1E-04 | 2.8E-02 |
| chr9:46155237-46155947 | 711  | 4.5 | 4.2 | 4.7 | ↓ | -0.6 | 3.0E-04 | 5.9E-02 |
| chr9:46156490-46156863 | 374  | 2.7 | 3.1 | 2.0 | ↑ | 1.1  | 2.4E-05 | 1.0E-02 |
| chr9:46518750-46521075 | 2326 | 6.2 | 6.0 | 6.4 | ↓ | -0.4 | 5.1E-05 | 1.7E-02 |
| chr9:46999865-47001457 | 1593 | 6.2 | 5.9 | 6.4 | ↓ | -0.5 | 7.7E-06 | 4.5E-03 |
| chr9:47148867-47149159 | 293  | 2.4 | 1.8 | 2.8 | ↓ | -0.9 | 6.6E-04 | 9.8E-02 |
| chr9:47270473-47271089 | 617  | 3.0 | 2.5 | 3.3 | ↓ | -0.8 | 5.3E-04 | 8.7E-02 |
| chr9:47482264-47483330 | 1067 | 5.6 | 5.4 | 5.8 | ↓ | -0.4 | 2.3E-05 | 9.9E-03 |
| chr9:47711957-47712836 | 880  | 4.6 | 4.1 | 4.9 | ↓ | -0.8 | 6.0E-07 | 5.5E-04 |
| chr9:47722457-47722754 | 298  | 1.8 | 2.3 | 1.1 | ↑ | 1.3  | 1.2E-04 | 3.1E-02 |
| chr9:47901656-47902069 | 414  | 3.5 | 3.0 | 3.8 | ↓ | -0.9 | 5.4E-05 | 1.8E-02 |
| chr9:48077042-48078127 | 1086 | 5.7 | 5.6 | 5.9 | ↓ | -0.3 | 2.6E-04 | 5.5E-02 |
| chr9:48144956-48145628 | 673  | 3.4 | 3.0 | 3.7 | ↓ | -0.8 | 2.0E-04 | 4.6E-02 |
| chr9:48196311-48197438 | 1128 | 5.6 | 5.4 | 5.8 | ↓ | -0.4 | 1.0E-04 | 2.8E-02 |
| chr9:48210865-48212476 | 1612 | 6.0 | 5.8 | 6.2 | ↓ | -0.3 | 2.0E-04 | 4.7E-02 |
| chr9:48780853-48781550 | 698  | 3.4 | 3.8 | 3.0 | ↑ | 0.8  | 5.6E-05 | 1.8E-02 |
| chr9:48875975-48876367 | 393  | 2.1 | 2.6 | 1.5 | ↑ | 1.1  | 4.3E-04 | 7.6E-02 |
| chr9:50136401-50136968 | 568  | 3.8 | 3.4 | 4.1 | ↓ | -0.7 | 2.9E-05 | 1.2E-02 |
| chr9:50221483-50222060 | 578  | 2.8 | 3.2 | 2.4 | ↑ | 0.9  | 2.9E-04 | 5.8E-02 |
| chr9:50280760-50281965 | 1206 | 4.9 | 4.7 | 5.1 | ↓ | -0.4 | 3.0E-04 | 5.9E-02 |
| chr9:50306131-50307126 | 996  | 4.7 | 4.4 | 4.9 | ↓ | -0.5 | 9.5E-06 | 5.1E-03 |
| chr9:50307350-50308224 | 875  | 4.1 | 3.3 | 4.6 | ↓ | -1.3 | 4.9E-13 | 3.1E-09 |
| chr9:50309902-50312085 | 2184 | 5.7 | 4.8 | 6.2 | ↓ | -1.4 | 6.6E-56 | 2.9E-51 |
| chr9:50312125-50312636 | 512  | 2.9 | 2.3 | 3.3 | ↓ | -1.0 | 4.8E-05 | 1.6E-02 |
| chr9:50312892-50314245 | 1354 | 5.3 | 4.8 | 5.7 | ↓ | -0.9 | 2.9E-15 | 4.2E-11 |
| chr9:50315701-50316533 | 833  | 3.6 | 3.2 | 4.0 | ↓ | -0.8 | 2.5E-05 | 1.0E-02 |
| chr9:50376048-50376991 | 944  | 4.4 | 4.1 | 4.7 | ↓ | -0.6 | 8.4E-05 | 2.4E-02 |
| chr9:50494544-50495526 | 983  | 4.4 | 4.2 | 4.6 | ↓ | -0.4 | 5.8E-04 | 9.0E-02 |
| chr9:51153572-51154125 | 554  | 3.1 | 2.7 | 3.5 | ↓ | -0.8 | 1.6E-04 | 3.9E-02 |
| chr9:5148875-5149558   | 684  | 3.8 | 3.5 | 4.1 | ↓ | -0.6 | 1.5E-04 | 3.7E-02 |
| chr9:51853171-51854527 | 1357 | 5.3 | 5.0 | 5.6 | ↓ | -0.6 | 5.3E-08 | 7.6E-05 |
| chr9:52231045-52232101 | 1057 | 4.6 | 4.2 | 5.0 | ↓ | -0.8 | 7.5E-10 | 1.8E-06 |
| chr9:52392323-52393894 | 1572 | 5.9 | 6.0 | 5.7 | ↑ | 0.4  | 2.2E-04 | 4.8E-02 |
| chr9:52431338-52431851 | 514  | 3.6 | 3.9 | 3.3 | ↑ | 0.7  | 1.3E-04 | 3.3E-02 |
| chr9:52473456-52473721 | 266  | 2.5 | 1.9 | 2.9 | ↓ | -0.9 | 5.7E-04 | 9.0E-02 |
| chr9:52473867-52475152 | 1286 | 4.8 | 5.0 | 4.6 | ↑ | 0.5  | 5.9E-05 | 1.9E-02 |

|                        |      |     |     |     |   |      |         |         |
|------------------------|------|-----|-----|-----|---|------|---------|---------|
| chr9:52481277-52481613 | 337  | 2.5 | 2.9 | 1.8 | ↑ | 1.1  | 2.7E-04 | 5.6E-02 |
| chr9:52589444-52589961 | 518  | 2.5 | 2.9 | 1.9 | ↑ | 1.0  | 6.1E-04 | 9.3E-02 |
| chr9:52744473-52745542 | 1070 | 3.9 | 4.2 | 3.5 | ↑ | 0.6  | 5.4E-04 | 8.8E-02 |
| chr9:52748722-52750096 | 1375 | 4.8 | 5.0 | 4.6 | ↑ | 0.4  | 2.7E-04 | 5.6E-02 |
| chr9:52812615-52813316 | 702  | 4.0 | 4.4 | 3.6 | ↑ | 0.8  | 3.0E-06 | 2.0E-03 |
| chr9:52863584-52864034 | 451  | 3.8 | 3.4 | 4.1 | ↓ | -0.7 | 1.5E-04 | 3.7E-02 |
| chr9:52971901-52972414 | 514  | 2.5 | 2.9 | 2.0 | ↑ | 0.9  | 4.4E-04 | 7.6E-02 |
| chr9:53002947-53003410 | 464  | 2.9 | 3.4 | 2.2 | ↑ | 1.2  | 1.8E-05 | 8.5E-03 |
| chr9:53102997-53103622 | 626  | 3.4 | 3.7 | 3.0 | ↑ | 0.7  | 6.2E-04 | 9.5E-02 |
| chr9:53113020-53115165 | 2146 | 5.6 | 5.8 | 5.4 | ↑ | 0.4  | 5.4E-04 | 8.8E-02 |
| chr9:53236923-53237501 | 579  | 3.1 | 3.4 | 2.6 | ↑ | 0.8  | 5.5E-04 | 8.8E-02 |
| chr9:53241088-53241756 | 669  | 3.5 | 3.8 | 3.1 | ↑ | 0.7  | 6.9E-04 | 9.9E-02 |
| chr9:53416820-53417196 | 377  | 2.9 | 3.2 | 2.4 | ↑ | 0.9  | 4.5E-04 | 7.8E-02 |
| chr9:5395921-5396301   | 381  | 3.6 | 3.9 | 3.2 | ↑ | 0.7  | 8.3E-05 | 2.4E-02 |
| chr9:54263882-54264325 | 444  | 3.9 | 3.4 | 4.4 | ↓ | -1.0 | 3.1E-10 | 8.6E-07 |
| chr9:54332904-54333251 | 348  | 2.7 | 2.1 | 3.1 | ↓ | -1.0 | 4.3E-04 | 7.5E-02 |
| chr9:545839-546718     | 880  | 5.1 | 4.8 | 5.4 | ↓ | -0.5 | 1.3E-05 | 6.5E-03 |
| chr9:54793365-54793720 | 356  | 2.9 | 2.2 | 3.5 | ↓ | -1.3 | 1.3E-07 | 1.4E-04 |
| chr9:54977607-54978115 | 509  | 3.8 | 4.1 | 3.4 | ↑ | 0.7  | 6.4E-04 | 9.7E-02 |
| chr9:55701396-55701996 | 601  | 5.2 | 4.8 | 5.5 | ↓ | -0.6 | 6.9E-07 | 6.2E-04 |
| chr9:57872485-57873841 | 1357 | 3.8 | 2.6 | 4.5 | ↓ | -1.9 | 8.8E-09 | 1.5E-05 |
| chr9:57873846-57874504 | 659  | 3.0 | 1.8 | 3.6 | ↓ | -1.8 | 4.2E-09 | 8.5E-06 |
| chr9:57875725-57876367 | 643  | 3.3 | 2.7 | 3.7 | ↓ | -1.0 | 2.7E-06 | 1.8E-03 |
| chr9:57877140-57877434 | 295  | 2.3 | 1.7 | 2.7 | ↓ | -1.1 | 2.2E-04 | 4.8E-02 |
| chr9:57921526-57923193 | 1668 | 5.5 | 5.0 | 5.9 | ↓ | -0.8 | 6.6E-12 | 2.6E-08 |
| chr9:58067300-58067942 | 643  | 3.3 | 2.5 | 3.9 | ↓ | -1.4 | 1.2E-06 | 9.0E-04 |
| chr9:58070017-58071190 | 1174 | 3.7 | 3.1 | 4.1 | ↓ | -0.9 | 1.6E-05 | 7.7E-03 |
| chr9:58084077-58084699 | 623  | 3.9 | 3.6 | 4.2 | ↓ | -0.5 | 4.7E-04 | 8.0E-02 |
| chr9:58096005-58097048 | 1044 | 4.1 | 3.7 | 4.3 | ↓ | -0.6 | 1.6E-04 | 3.9E-02 |
| chr9:58114153-58115209 | 1057 | 4.1 | 3.7 | 4.4 | ↓ | -0.7 | 4.4E-06 | 2.8E-03 |
| chr9:58772493-58774036 | 1544 | 5.2 | 5.0 | 5.4 | ↓ | -0.4 | 3.5E-04 | 6.5E-02 |
| chr9:59039568-59039938 | 371  | 2.7 | 2.2 | 3.1 | ↓ | -0.9 | 3.0E-04 | 5.9E-02 |
| chr9:59112768-59113506 | 739  | 3.4 | 2.9 | 3.7 | ↓ | -0.8 | 3.1E-04 | 6.0E-02 |
| chr9:59385566-59385934 | 369  | 1.9 | 1.3 | 2.4 | ↓ | -1.1 | 6.8E-04 | 9.8E-02 |
| chr9:5968571-5968978   | 408  | 4.2 | 3.7 | 4.5 | ↓ | -0.8 | 3.0E-07 | 2.9E-04 |
| chr9:59912160-59912507 | 348  | 2.6 | 2.1 | 3.0 | ↓ | -0.9 | 6.7E-04 | 9.8E-02 |
| chr9:60264501-60265448 | 948  | 4.6 | 4.8 | 4.3 | ↑ | 0.5  | 4.9E-05 | 1.7E-02 |
| chr9:60483698-60484794 | 1097 | 5.1 | 4.7 | 5.3 | ↓ | -0.6 | 5.0E-05 | 1.7E-02 |
| chr9:60920594-60921089 | 496  | 3.9 | 4.2 | 3.6 | ↑ | 0.6  | 3.0E-04 | 5.9E-02 |
| chr9:61249095-61250184 | 1090 | 5.7 | 5.5 | 5.9 | ↓ | -0.4 | 5.8E-04 | 9.0E-02 |
| chr9:61389369-61389795 | 427  | 3.1 | 2.6 | 3.5 | ↓ | -0.9 | 6.3E-05 | 2.0E-02 |
| chr9:62597190-62597850 | 661  | 3.4 | 3.0 | 3.8 | ↓ | -0.8 | 4.0E-04 | 7.3E-02 |
| chr9:62726015-62726818 | 804  | 4.4 | 4.1 | 4.6 | ↓ | -0.6 | 2.6E-05 | 1.0E-02 |
| chr9:63399115-63399391 | 277  | 1.8 | 1.0 | 2.4 | ↓ | -1.4 | 2.0E-05 | 9.0E-03 |
| chr9:63478291-63479743 | 1453 | 4.8 | 4.2 | 5.2 | ↓ | -1.0 | 1.6E-09 | 3.5E-06 |
| chr9:63485393-63486114 | 722  | 3.2 | 2.7 | 3.7 | ↓ | -1.0 | 8.9E-07 | 7.4E-04 |
| chr9:63538896-63540654 | 1759 | 6.4 | 6.5 | 6.3 | ↑ | 0.3  | 2.0E-04 | 4.6E-02 |

|                        |      |     |     |     |   |      |         |         |
|------------------------|------|-----|-----|-----|---|------|---------|---------|
| chr9:63583715-63584835 | 1121 | 6.3 | 5.8 | 6.6 | ↓ | -0.8 | 2.1E-14 | 1.9E-10 |
| chr9:63586679-63587044 | 366  | 2.3 | 1.3 | 2.8 | ↓ | -1.5 | 2.5E-06 | 1.7E-03 |
| chr9:63587330-63588249 | 920  | 3.8 | 3.3 | 4.1 | ↓ | -0.8 | 3.5E-05 | 1.3E-02 |
| chr9:63687666-63688075 | 410  | 3.9 | 3.6 | 4.2 | ↓ | -0.6 | 6.0E-04 | 9.3E-02 |
| chr9:63800394-63800706 | 313  | 2.3 | 2.8 | 1.7 | ↑ | 1.0  | 3.7E-04 | 6.9E-02 |
| chr9:64228067-64228801 | 735  | 5.0 | 4.8 | 5.2 | ↓ | -0.5 | 2.1E-04 | 4.8E-02 |
| chr9:64243213-64243743 | 531  | 4.3 | 3.9 | 4.6 | ↓ | -0.6 | 2.0E-05 | 9.0E-03 |
| chr9:65890946-65891442 | 497  | 2.5 | 1.9 | 3.0 | ↓ | -1.1 | 4.1E-05 | 1.5E-02 |
| chr9:66487488-66488073 | 586  | 2.9 | 3.4 | 2.4 | ↑ | 1.0  | 7.9E-05 | 2.3E-02 |
| chr9:66733170-66733665 | 496  | 4.0 | 3.3 | 4.4 | ↓ | -1.1 | 1.3E-07 | 1.4E-04 |
| chr9:66921856-66922267 | 412  | 4.8 | 4.5 | 5.1 | ↓ | -0.6 | 2.5E-06 | 1.7E-03 |
| chr9:67120347-67121673 | 1327 | 4.5 | 4.7 | 4.3 | ↑ | 0.4  | 3.9E-04 | 7.1E-02 |
| chr9:67746787-67747305 | 519  | 3.8 | 3.3 | 4.1 | ↓ | -0.9 | 1.6E-05 | 7.6E-03 |
| chr9:6825970-6826433   | 464  | 4.2 | 3.8 | 4.5 | ↓ | -0.7 | 9.0E-06 | 5.0E-03 |
| chr9:683875-684630     | 756  | 4.2 | 3.9 | 4.5 | ↓ | -0.6 | 7.5E-05 | 2.2E-02 |
| chr9:70541681-70542617 | 937  | 4.7 | 4.2 | 5.0 | ↓ | -0.8 | 5.9E-08 | 7.9E-05 |
| chr9:70959168-70959420 | 253  | 1.9 | 2.4 | 1.1 | ↑ | 1.3  | 1.1E-04 | 2.8E-02 |
| chr9:70960607-70961019 | 413  | 3.1 | 3.5 | 2.7 | ↑ | 0.7  | 6.8E-04 | 9.8E-02 |
| chr9:71373317-71373857 | 541  | 4.0 | 3.5 | 4.3 | ↓ | -0.8 | 2.0E-06 | 1.4E-03 |
| chr9:7142705-7143287   | 583  | 4.8 | 5.0 | 4.6 | ↑ | 0.4  | 6.1E-04 | 9.3E-02 |
| chr9:71451275-71452527 | 1253 | 4.0 | 4.2 | 3.6 | ↑ | 0.6  | 3.4E-04 | 6.5E-02 |
| chr9:71705540-71706227 | 688  | 5.0 | 4.7 | 5.2 | ↓ | -0.5 | 6.9E-04 | 9.9E-02 |
| chr9:71855374-71856684 | 1311 | 4.8 | 4.5 | 5.1 | ↓ | -0.6 | 3.3E-06 | 2.1E-03 |
| chr9:719069-719588     | 520  | 3.0 | 2.6 | 3.3 | ↓ | -0.8 | 4.6E-04 | 8.0E-02 |
| chr9:72768734-72769071 | 338  | 2.2 | 2.6 | 1.6 | ↑ | 1.0  | 4.9E-04 | 8.3E-02 |
| chr9:73117751-73118004 | 254  | 2.6 | 3.0 | 2.0 | ↑ | 1.0  | 2.1E-04 | 4.7E-02 |
| chr9:73333418-73333942 | 525  | 3.2 | 2.7 | 3.5 | ↓ | -0.7 | 3.7E-04 | 6.9E-02 |
| chr9:73594049-73594315 | 267  | 2.2 | 1.6 | 2.7 | ↓ | -1.1 | 2.8E-04 | 5.7E-02 |
| chr9:73932201-73933813 | 1613 | 5.7 | 5.4 | 6.0 | ↓ | -0.5 | 1.3E-05 | 6.2E-03 |
| chr9:75409035-75409303 | 269  | 1.9 | 1.2 | 2.3 | ↓ | -1.2 | 3.8E-04 | 6.9E-02 |
| chr9:75614210-75614759 | 550  | 5.6 | 5.4 | 5.8 | ↓ | -0.4 | 7.1E-05 | 2.1E-02 |
| chr9:77005133-77005666 | 534  | 2.7 | 2.0 | 3.2 | ↓ | -1.2 | 9.6E-05 | 2.6E-02 |
| chr9:77272064-77272583 | 520  | 3.7 | 3.3 | 4.0 | ↓ | -0.7 | 5.0E-04 | 8.3E-02 |
| chr9:7766265-7766744   | 480  | 3.9 | 3.3 | 4.3 | ↓ | -1.0 | 2.4E-08 | 3.7E-05 |
| chr9:78310859-78311151 | 293  | 3.1 | 2.7 | 3.5 | ↓ | -0.8 | 1.2E-04 | 3.1E-02 |
| chr9:78317782-78318644 | 863  | 3.4 | 3.7 | 3.0 | ↑ | 0.7  | 6.9E-04 | 9.9E-02 |
| chr9:7997843-7998447   | 605  | 4.1 | 3.8 | 4.4 | ↓ | -0.5 | 6.6E-04 | 9.8E-02 |
| chr9:80651755-80652273 | 519  | 3.7 | 3.2 | 4.0 | ↓ | -0.7 | 7.4E-05 | 2.2E-02 |
| chr9:81481141-81481435 | 295  | 2.4 | 2.9 | 1.7 | ↑ | 1.1  | 2.4E-05 | 1.0E-02 |
| chr9:82861789-82862613 | 825  | 3.7 | 3.2 | 4.0 | ↓ | -0.7 | 1.8E-04 | 4.2E-02 |
| chr9:8358485-8358849   | 365  | 3.9 | 4.2 | 3.4 | ↑ | 0.9  | 1.1E-07 | 1.2E-04 |
| chr9:84775382-84775800 | 419  | 4.2 | 4.5 | 3.9 | ↑ | 0.6  | 6.7E-05 | 2.1E-02 |
| chr9:84977364-84977878 | 515  | 3.0 | 2.3 | 3.5 | ↓ | -1.2 | 1.6E-06 | 1.2E-03 |
| chr9:85498509-85498757 | 249  | 1.8 | 2.2 | 1.0 | ↑ | 1.2  | 4.7E-04 | 8.0E-02 |
| chr9:86172785-86173167 | 383  | 4.1 | 3.7 | 4.3 | ↓ | -0.6 | 5.7E-04 | 9.0E-02 |
| chr9:86203244-86203659 | 416  | 2.0 | 2.5 | 1.3 | ↑ | 1.2  | 2.4E-04 | 5.2E-02 |
| chr9:86235703-86236191 | 489  | 2.9 | 3.3 | 2.5 | ↑ | 0.8  | 6.3E-04 | 9.6E-02 |

|                          |      |     |     |     |   |          |         |         |
|--------------------------|------|-----|-----|-----|---|----------|---------|---------|
| chr9:87544733-87545288   | 556  | 2.9 | 2.3 | 3.3 | ↓ | -1.0     | 2.3E-05 | 1.0E-02 |
| chr9:87546652-87547256   | 605  | 4.0 | 3.3 | 4.5 | ↓ | -1.3     | 1.1E-14 | 1.2E-10 |
| chr9:87547349-87547695   | 347  | 1.8 | 1.1 | 2.3 | ↓ | -1.2     | 1.7E-04 | 4.1E-02 |
| chr9:87883082-87883299   | 218  | 2.2 | 1.4 | 2.6 | ↓ | -1.2     | 9.3E-05 | 2.6E-02 |
| chr9:8872440-8873507     | 1068 | 4.9 | 4.6 | 5.1 | ↓ | -0.4     | 2.0E-04 | 4.7E-02 |
| chr9:89217643-89218141   | 499  | 3.1 | 2.4 | 3.6 | ↓ | -1.2     | 2.6E-06 | 1.8E-03 |
| chr9:89218323-89218631   | 309  | 2.5 | 1.1 | 3.3 | ↓ | -2.2     | 3.0E-14 | 2.2E-10 |
| chr9:93822353-93822829   | 477  | 2.9 | 2.5 | 3.2 | ↓ | -0.8     | 6.7E-04 | 9.8E-02 |
| chr9:94501923-94502247   | 325  | 2.4 | 1.7 | 2.9 | ↓ | -1.2     | 2.4E-05 | 1.0E-02 |
| chr9:94663633-94664340   | 708  | 2.9 | 2.4 | 3.3 | ↓ | -0.9     | 9.9E-05 | 2.7E-02 |
| chr9:9502421-9502905     | 485  | 3.5 | 3.8 | 3.1 | ↑ | 0.7      | 2.7E-04 | 5.5E-02 |
| chr9:95552669-95553008   | 340  | 1.7 | 2.1 | 0.9 | ↑ | 1.2      | 4.9E-04 | 8.3E-02 |
| chr9:95602226-95602612   | 387  | 1.9 | 2.4 | 1.2 | ↑ | 1.1      | 5.4E-04 | 8.8E-02 |
| chr9:95975382-95976022   | 641  | 3.2 | 3.6 | 2.8 | ↑ | 0.8      | 6.4E-04 | 9.6E-02 |
| chr9:97319815-97320688   | 874  | 3.6 | 4.1 | 2.9 | ↑ | 1.2      | 1.9E-11 | 7.1E-08 |
| chr9:97322598-97323407   | 810  | 4.2 | 4.7 | 3.5 | ↑ | 1.2      | 2.4E-12 | 1.2E-08 |
| chr9:97324253-97324915   | 663  | 3.5 | 4.1 | 2.1 | ↑ | 2.0      | 2.7E-17 | 5.9E-13 |
| chr9:97325838-97326198   | 361  | 2.5 | 2.9 | 1.9 | ↑ | 1.0      | 8.8E-05 | 2.5E-02 |
| chr9:97330184-97331311   | 1128 | 4.7 | 5.1 | 4.2 | ↑ | 1.0      | 5.3E-07 | 4.9E-04 |
| chr9:97548309-97548523   | 215  | 2.0 | 2.5 | 1.4 | ↑ | 1.1      | 5.5E-04 | 8.8E-02 |
| chr9:99364605-99364911   | 307  | 1.8 | 1.0 | 2.3 | ↓ | -1.3     | 1.9E-04 | 4.5E-02 |
| chr9:99367479-99368185   | 707  | 3.2 | 2.7 | 3.6 | ↓ | -0.9     | 7.8E-06 | 4.5E-03 |
| chrX:124797716-124798226 | 511  | 3.4 | 2.4 | 3.9 | ↓ | 1.460355 | 2.6E-06 | 1.9E-02 |
| chrX:122007584-122008404 | 821  | 3.5 | 2.9 | 4.0 | ↓ | 1.114052 | 1.9E-05 | 6.7E-02 |
| chrX:142168950-142171433 | 2484 | 5.8 | 5.5 | 6.0 | ↓ | 0.483541 | 4.2E-05 | 7.7E-02 |
