# Supplementary material for: Arterial endothelial methylome: differential DNA methylation in athero-susceptible disturbed flow regions in vivo
Source: PubMed Central journal article supplement (PMC4492093; doi:10.1186/s12864-015-1656-4), 2015-07-07
Supplement: 12864_2015_1656_MOESM5_ESM.pdf [file 12864_2015_1656_MOESM5_ESM.pdf]

**Supplementary Table 2b. M-AA vs F-AA DMR (FDR<0.1)**

| DMR                       | Close Emsembl Genes                        | Human           | Conc | Conc_ | Conc_ | Fold,<br>log2<br>(M/F) | p-value | FDR     |         |
|---------------------------|--------------------------------------------|-----------------|------|-------|-------|------------------------|---------|---------|---------|
|                           |                                            | Homolog<br>Gene |      | M     | F     |                        |         |         |         |
| chr10:17454148-17454499   |                                            |                 | 3.5  | 2.5   | 4.1   | ↓                      | -1.6    | 9.3E-06 | 6.1E-02 |
| chr10:221144-221681       |                                            |                 | 4.0  | 4.5   | 3.3   | ↑                      | 1.2     | 1.5E-05 | 7.3E-02 |
| chr10:58058325-58058772   |                                            |                 | 4.0  | 3.1   | 4.5   | ↓                      | -1.4    | 7.0E-07 | 1.4E-02 |
| chr10:60343312-60343638   |                                            |                 | 3.8  | 4.4   | 2.5   | ↑                      | 2.0     | 1.9E-06 | 1.9E-02 |
| chr11:25393502-25394275   |                                            |                 | 3.8  | 3.0   | 4.4   | ↓                      | -1.4    | 1.3E-06 | 3.5E-03 |
| chr11:25403726-25404312   |                                            |                 | 3.2  | 2.0   | 3.8   | ↓                      | -1.8    | 4.6E-06 | 9.1E-03 |
| chr11:3144847-3145100     |                                            |                 | 2.9  | 1.9   | 3.5   | ↓                      | -1.6    | 5.7E-05 | 6.4E-02 |
| chr11:3441950-3442496     |                                            |                 | 3.4  | 3.9   | 2.7   | ↑                      | 1.3     | 1.0E-04 | 8.6E-02 |
| chr11:5155092-5155566     |                                            |                 | 3.5  | 2.7   | 4.0   | ↓                      | -1.3    | 7.4E-05 | 7.3E-02 |
| chr11:59146749-59147040   |                                            |                 | 3.2  | 2.2   | 3.8   | ↓                      | -1.6    | 5.4E-05 | 6.4E-02 |
| chr11:71154839-71155313   |                                            |                 | 3.5  | 1.7   | 4.3   | ↓                      | -2.5    | 2.0E-08 | 3.1E-04 |
| chr11:74429343-74430107   |                                            |                 | 3.8  | 3.0   | 4.3   | ↓                      | -1.3    | 6.1E-05 | 6.4E-02 |
| chr11:74829071-74829672   |                                            |                 | 4.4  | 4.8   | 3.9   | ↑                      | 0.9     | 8.1E-05 | 7.5E-02 |
| chr11:81332880-81333422   |                                            |                 | 4.6  | 5.0   | 4.0   | ↑                      | 0.9     | 3.2E-05 | 4.6E-02 |
| chr11:81576451-81577438   |                                            |                 | 5.8  | 5.4   | 6.1   | ↓                      | -0.7    | 1.2E-04 | 9.4E-02 |
| chr11:81699641-81699962   |                                            |                 | 3.4  | 3.9   | 2.6   | ↑                      | 1.3     | 8.8E-05 | 7.7E-02 |
| chr11:82068819-82069302   |                                            |                 | 4.8  | 5.2   | 4.2   | ↑                      | 0.9     | 1.8E-05 | 3.2E-02 |
| chr11:82141341-82141612   |                                            |                 | 2.8  | 1.3   | 3.5   | ↓                      | -2.2    | 5.8E-07 | 2.3E-03 |
| chr11:82217764-82218478   | ENSSSCG00000009537                         | FAM155A         | 3.8  | 4.5   | 2.4   | ↑                      | 2.1     | 2.5E-06 | 5.6E-03 |
| chr11:82423796-82424351   |                                            |                 | 4.7  | 5.3   | 3.8   | ↑                      | 1.5     | 5.4E-07 | 2.3E-03 |
| chr11:82526273-82526624   |                                            |                 | 3.9  | 4.6   | 2.6   | ↑                      | 1.9     | 3.6E-07 | 2.3E-03 |
| chr11:82528350-82529340   |                                            |                 | 5.4  | 5.7   | 4.9   | ↑                      | 0.8     | 7.9E-07 | 2.5E-03 |
| chr11:82531122-82531428   |                                            |                 | 3.1  | 2.2   | 3.7   | ↓                      | -1.5    | 4.4E-05 | 5.8E-02 |
| chr11:83105607-83106118   |                                            |                 | 3.7  | 4.2   | 2.9   | ↑                      | 1.3     | 2.9E-05 | 4.5E-02 |
| chr12:3750542-3750856     |                                            |                 | 3.4  | 2.3   | 4.0   | ↓                      | -1.6    | 4.4E-06 | 3.2E-02 |
| chr12:57044581-57045239   |                                            |                 | 4.8  | 5.2   | 4.2   | ↑                      | 1.1     | 1.3E-07 | 1.4E-03 |
| chr12:7936005-7936548     |                                            |                 | 4.6  | 3.4   | 5.2   | ↓                      | -1.7    | 3.3E-12 | 7.2E-08 |
| chr13:142601491-142601880 |                                            |                 | 3.8  | 4.3   | 3.0   | ↑                      | 1.3     | 9.6E-06 | 6.9E-02 |
| chr13:213684551-213685031 |                                            |                 | 3.4  | 2.1   | 4.1   | ↓                      | -2.0    | 7.6E-08 | 1.6E-03 |
| chr13:36988236-36988590   | ENSSSCG00000011422;<br>ENSSSCG00000011419  |                 | 2.8  | 1.5   | 3.5   | ↓                      | -2.0    | 7.7E-06 | 6.9E-02 |
| chr14:114236258-114236768 |                                            |                 | 6.2  | 7.1   | 3.0   | ↑                      | 4.1     | 1.6E-79 | 4.3E-75 |
| chr14:120817949-120818348 |                                            |                 | 2.8  | 3.5   | 1.4   | ↑                      | 2.0     | 8.9E-06 | 6.0E-02 |
| chr14:21680664-21682103   |                                            |                 | 5.3  | 5.8   | 4.5   | ↑                      | 1.3     | 9.8E-12 | 1.3E-07 |
| chr14:23562327-23562600   |                                            |                 | 3.2  | 1.8   | 3.9   | ↓                      | -2.1    | 1.0E-07 | 9.2E-04 |
| chr15:143502213-143503063 |                                            |                 | 5.2  | 5.9   | 3.7   | ↑                      | 2.2     | 4.6E-06 | 1.7E-02 |
| chr15:146079987-146081418 |                                            |                 | 5.0  | 4.5   | 5.4   | ↓                      | -0.9    | 2.9E-06 | 1.5E-02 |
| chr15:152326613-152327679 | ENSSSCG00000018694;<br>ENSSSCG000000025228 | TRAF3IP1        | 5.7  | 5.1   | 6.1   | ↓                      | -1.0    | 1.2E-05 | 3.6E-02 |
| chr15:36158422-36159294   | ENSSSCG00000015742                         | TMEM177         | 4.0  | 4.6   | 3.1   | ↑                      | 1.4     | 2.3E-06 | 1.5E-02 |
| chr15:92659464-92659882   |                                            |                 | 4.1  | 3.2   | 4.6   | ↓                      | -1.4    | 1.1E-07 | 1.6E-03 |
| chr17:12247638-12248606   |                                            |                 | 5.6  | 6.1   | 4.7   | ↑                      | 1.4     | 3.8E-18 | 5.7E-14 |
| chr17:13394687-13394972   |                                            |                 | 3.4  | 3.9   | 2.5   | ↑                      | 1.4     | 1.9E-05 | 9.4E-02 |
| chr17:9918703-9919284     |                                            |                 | 3.6  | 2.6   | 4.2   | ↓                      | -1.6    | 1.4E-05 | 9.4E-02 |
| chr18:15295476-15295879   |                                            |                 | 3.7  | 4.3   | 2.7   | ↑                      | 1.6     | 1.2E-06 | 9.3E-03 |
| chr18:46378573-46378995   |                                            |                 | 3.3  | 2.2   | 4.0   | ↓                      | -1.7    | 3.5E-06 | 1.2E-02 |
| chr18:56028165-56028716   |                                            |                 | 4.0  | 3.2   | 4.5   | ↓                      | -1.3    | 3.1E-06 | 1.2E-02 |
| chr18:57403083-57403702   |                                            |                 | 3.8  | 2.8   | 4.4   | ↓                      | -1.5    | 1.7E-06 | 9.3E-03 |
| chr18:57588741-57589554   |                                            |                 | 4.2  | 3.6   | 4.7   | ↓                      | -1.1    | 2.0E-05 | 5.5E-02 |
| chr18:5948850-5949516     |                                            |                 | 4.4  | 5.0   | 3.4   | ↑                      | 1.7     | 6.0E-08 | 9.8E-04 |
| chr2:158290250-158290666  | ENSSSCG00000014445                         |                 | 3.1  | 3.8   | 1.7   | ↑                      | 2.1     | 2.5E-07 | 3.5E-03 |
| chr2:18074-19445          |                                            |                 | 6.3  | 6.5   | 5.9   | ↑                      | 0.6     | 2.8E-07 | 3.5E-03 |
| chr3:1352629-1352906      |                                            |                 | 3.1  | 3.7   | 1.8   | ↑                      | 1.9     | 5.0E-07 | 7.8E-03 |
| chr3:1355858-1356151      |                                            |                 | 2.8  | 3.5   | 1.6   | ↑                      | 1.9     | 3.3E-06 | 2.0E-02 |

|                          |                    |        |     |     |     |   |      |         |         |
|--------------------------|--------------------|--------|-----|-----|-----|---|------|---------|---------|
| chr3:139836732-139837125 | ENSSSCG00000024285 | DLG4   | 4.0 | 4.4 | 3.3 | ↑ | 1.2  | 1.1E-05 | 4.3E-02 |
| chr3:24435795-24436648   |                    |        | 4.6 | 4.0 | 5.0 | ↓ | -1.0 | 7.1E-06 | 3.1E-02 |
| chr3:36871089-36871382   |                    |        | 3.4 | 4.1 | 2.0 | ↑ | 2.1  | 1.1E-09 | 3.3E-05 |
| chr3:48428171-48428915   |                    |        | 4.3 | 3.5 | 4.8 | ↓ | -1.3 | 1.8E-06 | 1.4E-02 |
| chr3:54694697-54695003   |                    |        | 3.8 | 4.3 | 3.1 | ↑ | 1.3  | 3.2E-05 | 9.9E-02 |
| chr3:55513002-55513473   |                    |        | 4.0 | 3.2 | 4.6 | ↓ | -1.3 | 1.4E-06 | 1.4E-02 |
| chr3:56000336-56000742   |                    |        | 3.7 | 4.2 | 2.9 | ↑ | 1.3  | 1.6E-05 | 5.5E-02 |
| chr3:72888096-72888362   |                    |        | 3.1 | 3.7 | 2.0 | ↑ | 1.7  | 6.4E-06 | 3.1E-02 |
| chr4:114334801-114335150 |                    |        | 4.0 | 4.5 | 3.4 | ↑ | 1.1  | 1.6E-05 | 9.8E-02 |
| chr4:116214260-116214917 |                    |        | 7.0 | 8.0 | 3.2 | ↑ | 4.7  | 3.7E-88 | 9.1E-84 |
| chr4:42310963-42311625   |                    |        | 3.9 | 3.1 | 4.4 | ↓ | -1.3 | 1.4E-05 | 9.8E-02 |
| chr4:42848379-42849055   |                    |        | 4.2 | 4.7 | 3.4 | ↑ | 1.3  | 4.8E-06 | 5.9E-02 |
| chr5:2027909-2028675     |                    |        | 4.6 | 5.0 | 4.1 | ↑ | 1.0  | 1.3E-05 | 4.8E-02 |
| chr5:20665705-20666161   | ENSSSCG00000026482 |        | 3.6 | 2.8 | 4.1 | ↓ | -1.3 | 3.0E-05 | 9.7E-02 |
| chr5:21589985-21590443   |                    |        | 2.8 | 3.5 | 1.4 | ↑ | 2.1  | 1.4E-06 | 1.4E-02 |
| chr5:34074807-34076488   | ENSSSCG00000019414 | U1     | 5.4 | 4.9 | 5.8 | ↓ | -0.9 | 7.8E-07 | 1.4E-02 |
| chr5:67329424-67329790   |                    |        | 3.0 | 1.8 | 3.7 | ↓ | -1.8 | 1.1E-05 | 4.8E-02 |
| chr5:89657816-89658203   |                    |        | 3.7 | 2.9 | 4.2 | ↓ | -1.4 | 8.2E-06 | 4.8E-02 |
| chr6:30368331-30368557   |                    |        | 3.2 | 3.8 | 2.1 | ↑ | 1.7  | 7.0E-06 | 8.6E-02 |
| chr6:33915416-33915717   |                    |        | 3.8 | 4.3 | 2.9 | ↑ | 1.3  | 2.9E-06 | 5.3E-02 |
| chr6:34366891-34367163   |                    |        | 2.7 | 3.4 | 1.5 | ↑ | 1.9  | 1.1E-05 | 9.7E-02 |
| chr6:8798684-8799000     |                    |        | 3.3 | 1.7 | 4.0 | ↓ | -2.3 | 4.8E-09 | 1.8E-04 |
| chr7:24018404-24019537   | ENSSSCG00000001203 | ZNF193 | 4.6 | 3.8 | 5.2 | ↓ | -1.4 | 3.7E-08 | 5.1E-04 |
| chr7:47784400-47784675   |                    |        | 3.4 | 2.4 | 4.0 | ↓ | -1.6 | 4.3E-06 | 2.9E-02 |
| chr7:4996785-4997110     |                    |        | 3.4 | 4.1 | 2.1 | ↑ | 1.9  | 2.4E-08 | 5.1E-04 |
| chr7:74318862-74319526   |                    |        | 4.1 | 3.3 | 4.7 | ↓ | -1.4 | 2.8E-07 | 2.6E-03 |
| chr7:74327191-74327819   |                    |        | 3.8 | 2.9 | 4.4 | ↓ | -1.5 | 6.4E-06 | 3.5E-02 |
| chr8:10415714-10416338   |                    |        | 4.6 | 5.0 | 4.1 | ↑ | 0.9  | 3.3E-05 | 9.9E-02 |
| chr8:109402612-109403065 | ENSSSCG00000009093 | BBS7   | 3.1 | 3.8 | 2.0 | ↑ | 1.7  | 5.1E-06 | 9.4E-02 |
| chr8:145501645-145503243 |                    |        | 6.2 | 6.5 | 5.9 | ↑ | 0.5  | 1.9E-05 | 9.9E-02 |
| chr8:145967200-145968110 |                    |        | 4.5 | 4.9 | 3.8 | ↑ | 1.1  | 1.8E-05 | 9.9E-02 |
| chr8:77151721-77152250   |                    |        | 4.7 | 5.1 | 4.2 | ↑ | 0.9  | 2.2E-05 | 9.9E-02 |
| chr8:92568983-92569378   |                    |        | 4.1 | 4.6 | 3.5 | ↑ | 1.1  | 3.1E-05 | 9.9E-02 |
| chr9:146398689-146399163 | ENSSSCG00000015611 |        | 4.3 | 3.5 | 4.8 | ↓ | -1.2 | 3.1E-06 | 3.7E-02 |
| chr9:43233727-43234688   |                    |        | 4.8 | 4.0 | 5.3 | ↓ | -1.2 | 4.6E-08 | 1.1E-03 |
