# Supplementary material for: Arterial endothelial methylome: differential DNA methylation in athero-susceptible disturbed flow regions in vivo
Source: PubMed Central journal article supplement (PMC4492093; doi:10.1186/s12864-015-1656-4), 2015-07-07
Supplement: 12864_2015_1656_MOESM6_ESM.pdf [file 12864_2015_1656_MOESM6_ESM.pdf]

**Supplementary Table 3. Primers for qPCR analysis**

|    | <b>Swine Genes</b> | <b>Primers</b>                                           | <b>Amplicon Size (bp)</b> |
|----|--------------------|----------------------------------------------------------|---------------------------|
| 1  | ARHGAP25           | F. CAGGAGCTGCGAAAGGAAATAC<br>R. AGGCTGCAGACTTCTTCTCTC    | 145                       |
| 2  | HOXA1              | F.CCCTGGCCACGTATAATAACTC<br>R.AAATGTCTGCGCTGGAGAAG       | 101                       |
| 3  | HOXA2              | F.CCCTGTGCTGATACATTTT<br>R.GGAATGGTCTGCTCAAAAGG          | 93                        |
| 4  | HOXA3              | F.ACCGTGGCCAAACAAATC<br>R.GGTGGGCTCTTGTCACCTG            | 110                       |
| 5  | HOXA4              | F.ATGACCATGAGCTCGTTTTTG<br>R.CTGTGCTGCGCTACTCC           | 80                        |
| 6  | HOXA5              | F. CAGATCTACCCCTGGATGCG<br>R.TAGCGGTTGAAGTGGA ACTCC      | 134                       |
| 7  | HOXA6              | F.ATGCAGCGGATGAACTCC<br>R.AGGTAGCGGTTGAAGTGGAAC          | 122                       |
| 8  | HOXA7              | F.GCCAATTTCCGCATTTATCC<br>R.GTTGAAGTGGA ACTCCTTCTCC      | 114                       |
| 9  | HOXA10             | F.GAGAAGCCAGCTCTCCCTTG<br>R.GTCTGGTGCTTGGTGTAGGG         | 130                       |
| 10 | HOXA11             | F.CTTGCGGCCCAATGACATAC<br>R.TTGACTTGACGGTTCGGTGAG        | 84                        |
| 11 | HOXA13             | F.CCAAATGTACTGCCCAAAG<br>R.TAAGGGACGCGCTTCTTTC           | 126                       |
| 12 | HOXB5              | F. GATGAGGAAGCTTCACATCAGC<br>R. GCGGTTGAAGTGGA ACTCCTTTC | 115                       |
| 13 | HOXD4              | F.TCCGTGCGAGGAATATTTGC<br>R.GAAGGTCTGCTCACTAAAGTCG       | 133                       |
| 14 | UBB                | F.TGAGGGGTGGCTGCTAATTC<br>R.TGGCTAGAGTGCAGAGTAATGC       | 73                        |
| 15 | PECAM1             | F.CCTCGCCCATTTCTACCACTTT<br>R.CAGACTCCACCTCCTCGCTCAG     | 237                       |
| 16 | GAPDH              | F.CCTGTGACTTCAACAGTGACAC<br>R. CCCTGTTGCTGTAGCCAAATTC    | 123                       |
