# Supplementary material for: Arterial endothelial methylome: differential DNA methylation in athero-susceptible disturbed flow regions in vivo
Source: PubMed Central journal article supplement (PMC4492093; doi:10.1186/s12864-015-1656-4), 2015-07-07
Supplement: 12864_2015_1656_MOESM7_ESM.pdf [file 12864_2015_1656_MOESM7_ESM.pdf]

**Supplementary Table 4. Primers for MSP analysis of swine gene promoter methylation.**

| Swine Genes            | Methylation Primers                                   | Genomic DNA Sequence                                                                                                                                                                                                                    |
|------------------------|-------------------------------------------------------|-----------------------------------------------------------------------------------------------------------------------------------------------------------------------------------------------------------------------------------------|
| 1 ARHGAP25, (-27/+104) | F. GTTTAGTTTGGTTGGCGC<br>R. ACGACCATCTACTCACCGAT      | GCCCAGCCTGGCTGGCGCGCAGCGCTCCTTGGCCCTTCG<br>CTGCCACTGCTCACGTCCCCGGTCAGCTCGCTTGTCTGT<br>CCCTCTCCACAGCTCGGTCAAGGAGCGTGATGACCGGTGA<br>GCAGATGGCCGC                                                                                          |
| 2 ATF4, (-7072/-6918)  | F. TTTTAGGAATCGAATTTGAGTC<br>R. AATCGTATAACCTCTATCGCC | TTTCAGGAATCGAACCTGAGCCGAGCAGTGACAACACCG<br>GATCCTTAACCTGCTGATCCAGCAGGGAAGTCTCAAATG<br>CCGTCTTTGGTTGTGTGATGTCTGTCCCTTCTCCAGA<br>CACTGAGCTCCTTGGCGACAGAGGCCACACGACC                                                                       |
| 3 HOXA5, (-1694/-1479) | F. GTTTTCGGTCGTTTTTGTTC<br>R. TCTTCCACTTCATACGACGA    | GCTCCCGGCCGTTTCTGCCCGCAGGTGCTGTGTACGGGA<br>GTCACGGGGCCGAGGCCGCCAGACCTACACCCGCTACC<br>AGACGCTGGAGCTGGAGAAGGAGTTCCACTTCAACCGCTA<br>CCTGACGGGGCCCGCCGCATCAGATCGCAACCGCGCT<br>CTGCCTCACCAGCGCCAGATCAAGATCTGGTTCAGAAAC<br>CGCCGCATGAAGTGAAGA |
| 4 HOXB5, (-1238/-1082) | F. TACGTGGTTTGATTTTCGTC<br>R. CTACCGACAACCTCGCATT     | CACGTGGCCTGATCTCCGCCGGCCTTGGCCCGCTCATG<br>GCCTAAATTGGGGCCACCGGGTATCTATTTCTTTGCCTGAA<br>GCTAAAGGCTCCAGGCACCCCTTTCTGCCTCAAGCAGTAG<br>CTCAGCATCAAGTAGGGGAATGCGAAGCTGCCGGCAG                                                                |
| 5 HOXD4, (+173/+345)   | F. GTGAGTAGATTTTCGGAGGC<br>R. CTAAC TACAAACCCGAACGC   | GTGAGCAGACCTTCGGAGGCGGGCCCGGGCCAGGCT<br>CGGCCTGCCACGCGGAGTACAGGGCCAGAACCCAGCG<br>GCCCCGGCGGCACTACGGTGCCCCGGGAGAGCCGTGCC<br>CGGCACCCCGGCGCCCGCCCGCACCCGCTGCCCGGC<br>GCCCCGGCCTGCAGCCAG                                                   |
| 6 mir10a, (-219/-45)   | F. CGTGTTTTTTTGC GGAATC,<br>R. TCGCGTTCTTCTTTAAAAT    | CGTGTCCCTTTGCGGAACCGGCTGCTTCTGTTTCTAAGAGA<br>AGAGAAAAGAGAGTTGAAACCCTTGAATCCCAAGATGGAC<br>CCACAGCGCTTTTCTGTTCCAGAGCGCAACCTAGAA<br>CAAAACGAAATAAAACCAAGCACTCAAACCCACCCCAA<br>GGAAGAACGCGA                                                 |
| 7 UBB, (-432/-328)     | F. GGGAAGGTGGGAAAGAGGTAG<br>R. AGCATTGAAATTCCCGTTGGG  | GGGAAGGTGGGAAAGAGGTAGTATAGCCGGGCTTCTGGA<br>AACCTTGTCCGAATCCTGACGTGGAGAGGGTGTGCACCC<br>CACCTCCAACGGGAATTTCAATGCT                                                                                                                         |
